# Supplementary material
Source: MDPI journal article supplement (https://www.mdpi.com/2076-3263/13/6/170)
Supplement: s1 [file s1]

Archive with 7 entries (7 files):
- File S1-Ilmenite 1.xlsx
- File S2 - Ilmenite 2.xlsx
- File S3 - Leached ilm 1.xlsx
- File S4 - Leached ilm 2.xlsx
- File S5 -Pseudorutile 1.xlsx
- File S6 - Pseudorutile 2.xlsx
- Titles Of Files S1-S6.pdf
