# Supplementary material
Source: MDPI journal article supplement (https://www.mdpi.com/2076-3263/13/6/170)
Supplement: s1 [file s1 › File S1-Ilmenite 1.xlsx]

## Sheet: Direct Assessment of CLO 1
CLO1
Student #	Max	1	2	3	4	5	6	7	8	9	10	11	12	13	14	15	16	17	18	19	20	21	22	23	24	25	26	27	28	29	30	31	32	33	34	Average
AT1: Quiz 1	10	10	10	8	8	10																														9.2
AT2:Q1 Mid-Term Exam	10	7	10	10	10	10	6	10																												9
AT3
AT4
AT5
AT6
AT7
AT8
AT9
AT10
AT11
AT12
AT13
AT14
AT15
AT16
AT17
AT18
AT19
AT20
Student #		1	2	3	4	5	6	7	8	9	10	11	12	13	14	15	16	17	18	19	20	21	22	23	24	25	26	27	28	29	30	31	32	33	34
Target		0.7	0.7	0.7	0.7	0.7	0.7	0.7	0.7	0.7	0.7	0.7	0.7	0.7	0.7	0.7	0.7	0.7	0.7	0.7	0.7	0.7	0.7	0.7	0.7	0.7	0.7	0.7	0.7	0.7	0.7	0.7	0.7	0.7	0.7
Average AT1		0.92	0.92	0.92	0.92	0.92	0.92	0.92	0.92	0.92	0.92	0.92	0.92	0.92	0.92	0.92	0.92	0.92	0.92	0.92	0.92	0.92	0.92	0.92	0.92	0.92	0.92	0.92	0.92	0.92	0.92	0.92	0.92	0.92	0.92
Average AT2		0.9	0.9	0.9	0.9	0.9	0.9	0.9	0.9	0.9	0.9	0.9	0.9	0.9	0.9	0.9	0.9	0.9	0.9	0.9	0.9	0.9	0.9	0.9	0.9	0.9	0.9	0.9	0.9	0.9	0.9	0.9	0.9	0.9	0.9
AT1: Quiz 1		1	1	0.8	0.8	1	0	0
AT2:Q1 Mid-Term Exam		0.7	1	1	1	1	0.6	1
																								Number of students achieving CLO
																								5
																								6

## Sheet: Direct Assessment of CLO 2
CLO1
Student #	Max	1	2	3	4	5	6	7	8	9	10	11	12	13	14	15	16	17	18	19	20	21	22	23	24	25	26	27	28	29	30	31	32	33	34	Average
AT1: Quiz 1	10	10	10	8	6	9																														8.6
AT2:Q1 Mid-Term Exam	10	9	10	4	6	8	10	8																												7.85714
AT3
AT4
AT5
AT6
AT7
AT8
AT9
AT10
AT11
AT12
AT13
AT14
AT15
AT16
AT17
AT18
AT19
AT20
Student #		1	2	3	4	5	6	7	8	9	10	11	12	13	14	15	16	17	18	19	20	21	22	23	24	25	26	27	28	29	30	31	32	33	34
Target		0.7	0.7	0.7	0.7	0.7	0.7	0.7	0.7	0.7	0.7	0.7	0.7	0.7	0.7	0.7	0.7	0.7	0.7	0.7	0.7	0.7	0.7	0.7	0.7	0.7	0.7	0.7	0.7	0.7	0.7	0.7	0.7	0.7	0.7
Average AT1		0.86	0.86	0.86	0.86	0.86	0.86	0.86	0.86	0.86	0.86	0.86	0.86	0.86	0.86	0.86	0.86	0.86	0.86	0.86	0.86	0.86	0.86	0.86	0.86	0.86	0.86	0.86	0.86	0.86	0.86	0.86	0.86	0.86	0.86
Average AT2		0.785714	0.785714	0.785714	0.785714	0.785714	0.785714	0.785714	0.785714	0.785714	0.785714	0.785714	0.785714	0.785714	0.785714	0.785714	0.785714	0.785714	0.785714	0.785714	0.785714	0.785714	0.785714	0.785714	0.785714	0.785714	0.785714	0.785714	0.785714	0.785714	0.785714	0.785714	0.785714	0.785714	0.785714
AT1: Quiz 1		1	1	0.8	0.6	0.9	0	0
AT2:Q1 Mid-Term Exam		0.9	1	0.4	0.6	0.8	1	0.8
																								Number of students achieving CLO
																								4
																								5

## Sheet: Direct Assessment of CLO 3
CLO1
Student #	Max	1	2	3	4	5	6	7	8	9	10	11	12	13	14	15	16	17	18	19	20	21	22	23	24	25	26	27	28	29	30	31	32	33	34	Average
AT1: Quiz 2	10	9	10	9	9	9	8	10																												9.14286
AT2:Q1 Mid-Term Exam	10	9	10	5	9	6	10	8																												8.14286
AT3
AT4
AT5
AT6
AT7
AT8
AT9
AT10
AT11
AT12
AT13
AT14
AT15
AT16
AT17
AT18
AT19
AT20
Student #		1	2	3	4	5	6	7	8	9	10	11	12	13	14	15	16	17	18	19	20	21	22	23	24	25	26	27	28	29	30	31	32	33	34
Target		0.7	0.7	0.7	0.7	0.7	0.7	0.7	0.7	0.7	0.7	0.7	0.7	0.7	0.7	0.7	0.7	0.7	0.7	0.7	0.7	0.7	0.7	0.7	0.7	0.7	0.7	0.7	0.7	0.7	0.7	0.7	0.7	0.7	0.7
Average AT1		0.914286	0.914286	0.914286	0.914286	0.914286	0.914286	0.914286	0.914286	0.914286	0.914286	0.914286	0.914286	0.914286	0.914286	0.914286	0.914286	0.914286	0.914286	0.914286	0.914286	0.914286	0.914286	0.914286	0.914286	0.914286	0.914286	0.914286	0.914286	0.914286	0.914286	0.914286	0.914286	0.914286	0.914286
Average AT2		0.814286	0.814286	0.814286	0.814286	0.814286	0.814286	0.814286	0.814286	0.814286	0.814286	0.814286	0.814286	0.814286	0.814286	0.814286	0.814286	0.814286	0.814286	0.814286	0.814286	0.814286	0.814286	0.814286	0.814286	0.814286	0.814286	0.814286	0.814286	0.814286	0.814286	0.814286	0.814286	0.814286	0.814286
AT1: Quiz 2		0.9	1	0.9	0.9	0.9	0.8	1
AT2:Q1 Mid-Term Exam		0.9	1	0.5	0.9	0.6	1	0.8
																								Number of students achieving CLO
																								7
																								5

## Sheet: Direct Assessment of CLO 4
CLO1
Student #	Max	1	2	3	4	5	6	7	8	9	10	11	12	13	14	15	16	17	18	19	20	21	22	23	24	25	26	27	28	29	30	31	32	33	34	Average
AT1: Quiz 3	10	5	10	10	10	10	10	10																												9.28571
AT2:Q2 Mid-Term Exam	10	7	8	7	8	7	8	7																												7.42857
AT3
AT4
AT5
AT6
AT7
AT8
AT9
AT10
AT11
AT12
AT13
AT14
AT15
AT16
AT17
AT18
AT19
AT20
Student #		1	2	3	4	5	6	7	8	9	10	11	12	13	14	15	16	17	18	19	20	21	22	23	24	25	26	27	28	29	30	31	32	33	34
Target		0.7	0.7	0.7	0.7	0.7	0.7	0.7	0.7	0.7	0.7	0.7	0.7	0.7	0.7	0.7	0.7	0.7	0.7	0.7	0.7	0.7	0.7	0.7	0.7	0.7	0.7	0.7	0.7	0.7	0.7	0.7	0.7	0.7	0.7
Average AT1		0.928571	0.928571	0.928571	0.928571	0.928571	0.928571	0.928571	0.928571	0.928571	0.928571	0.928571	0.928571	0.928571	0.928571	0.928571	0.928571	0.928571	0.928571	0.928571	0.928571	0.928571	0.928571	0.928571	0.928571	0.928571	0.928571	0.928571	0.928571	0.928571	0.928571	0.928571	0.928571	0.928571	0.928571
Average AT2		0.742857	0.742857	0.742857	0.742857	0.742857	0.742857	0.742857	0.742857	0.742857	0.742857	0.742857	0.742857	0.742857	0.742857	0.742857	0.742857	0.742857	0.742857	0.742857	0.742857	0.742857	0.742857	0.742857	0.742857	0.742857	0.742857	0.742857	0.742857	0.742857	0.742857	0.742857	0.742857	0.742857	0.742857
AT1: Quiz 3		0.5	1	1	1	1	1	1
AT2:Q2 Mid-Term Exam		0.7	0.8	0.7	0.8	0.7	0.8	0.7
																								Number of students achieving CLO
																								6
																								7

## Sheet: Direct Assessment of CLO 5
CLO1
Student #	Max	1	2	3	4	5	6	7	8	9	10	11	12	13	14	15	16	17	18	19	20	21	22	23	24	25	26	27	28	29	30	31	32	33	34	Average
AT1: Quiz 5	10	10	8	10	10	9	6	7																												8.57143
AT2:Q3 Mid-Term Exam	6	6	1	2	3	1	5	0																												2.57143
AT3
AT4
AT5
AT6
AT7
AT8
AT9
AT10
AT11
AT12
AT13
AT14
AT15
AT16
AT17
AT18
AT19
AT20
Student #		1	2	3	4	5	6	7	8	9	10	11	12	13	14	15	16	17	18	19	20	21	22	23	24	25	26	27	28	29	30	31	32	33	34
Target		0.7	0.7	0.7	0.7	0.7	0.7	0.7	0.7	0.7	0.7	0.7	0.7	0.7	0.7	0.7	0.7	0.7	0.7	0.7	0.7	0.7	0.7	0.7	0.7	0.7	0.7	0.7	0.7	0.7	0.7	0.7	0.7	0.7	0.7
Average AT1		0.857143	0.857143	0.857143	0.857143	0.857143	0.857143	0.857143	0.857143	0.857143	0.857143	0.857143	0.857143	0.857143	0.857143	0.857143	0.857143	0.857143	0.857143	0.857143	0.857143	0.857143	0.857143	0.857143	0.857143	0.857143	0.857143	0.857143	0.857143	0.857143	0.857143	0.857143	0.857143	0.857143	0.857143
Average AT2		0.428571	0.428571	0.428571	0.428571	0.428571	0.428571	0.428571	0.428571	0.428571	0.428571	0.428571	0.428571	0.428571	0.428571	0.428571	0.428571	0.428571	0.428571	0.428571	0.428571	0.428571	0.428571	0.428571	0.428571	0.428571	0.428571	0.428571	0.428571	0.428571	0.428571	0.428571	0.428571	0.428571	0.428571
AT1: Quiz 5		1	0.8	1	1	0.9	0.6	0.7
AT2:Q3 Mid-Term Exam		1	0.166667	0.333333	0.5	0.166667	0.833333	0
																								Number of students achieving CLO
																								6
																								2

## Sheet: Direct Assessment of CLO 6
CLO1
Student #	Max	1	2	3	4	5	6	7	8	9	10	11	12	13	14	15	16	17	18	19	20	21	22	23	24	25	26	27	28	29	30	31	32	33	34	Average
AT1: Quiz 6	10	9	10	8	7	9	10	8																												8.71429
AT2:HW 10	10	9	10	9	9	9	9	9																												9.14286
AT3
AT4
AT5
AT6
AT7
AT8
AT9
AT10
AT11
AT12
AT13
AT14
AT15
AT16
AT17
AT18
AT19
AT20
Student #		1	2	3	4	5	6	7	8	9	10	11	12	13	14	15	16	17	18	19	20	21	22	23	24	25	26	27	28	29	30	31	32	33	34
Target		0.7	0.7	0.7	0.7	0.7	0.7	0.7	0.7	0.7	0.7	0.7	0.7	0.7	0.7	0.7	0.7	0.7	0.7	0.7	0.7	0.7	0.7	0.7	0.7	0.7	0.7	0.7	0.7	0.7	0.7	0.7	0.7	0.7	0.7
Average AT1		0.871429	0.871429	0.871429	0.871429	0.871429	0.871429	0.871429	0.871429	0.871429	0.871429	0.871429	0.871429	0.871429	0.871429	0.871429	0.871429	0.871429	0.871429	0.871429	0.871429	0.871429	0.871429	0.871429	0.871429	0.871429	0.871429	0.871429	0.871429	0.871429	0.871429	0.871429	0.871429	0.871429	0.871429
Average AT2		0.914286	0.914286	0.914286	0.914286	0.914286	0.914286	0.914286	0.914286	0.914286	0.914286	0.914286	0.914286	0.914286	0.914286	0.914286	0.914286	0.914286	0.914286	0.914286	0.914286	0.914286	0.914286	0.914286	0.914286	0.914286	0.914286	0.914286	0.914286	0.914286	0.914286	0.914286	0.914286	0.914286	0.914286
AT1: Quiz 6		0.9	1	0.8	0.7	0.9	1	0.8
AT2:HW10		0.9	1	0.9	0.9	0.9	0.9	0.9
																								Number of students achieving CLO
																								7
																								7

## Sheet: Direct Assessment of CLO 7
CLO1
Student #	Max	1	2	3	4	5	6	7	8	9	10	11	12	13	14	15	16	17	18	19	20	21	22	23	24	25	26	27	28	29	30	31	32	33	34	Average
AT1: HW 11	10	10	9	9	9	9	9	9																												9.14286
AT2:Q5 Final-Exam	6	4	3	0	3	3	3	0																												2.28571
AT3
AT4
AT5
AT6
AT7
AT8
AT9
AT10
AT11
AT12
AT13
AT14
AT15
AT16
AT17
AT18
AT19
AT20
Student #		1	2	3	4	5	6	7	8	9	10	11	12	13	14	15	16	17	18	19	20	21	22	23	24	25	26	27	28	29	30	31	32	33	34
Target		0.6	0.6	0.6	0.6	0.6	0.6	0.6	0.6	0.6	0.6	0.6	0.6	0.6	0.6	0.6	0.6	0.6	0.6	0.6	0.6	0.6	0.6	0.6	0.6	0.6	0.6	0.6	0.6	0.6	0.6	0.6	0.6	0.6	0.6
Average AT1		0.914286	0.914286	0.914286	0.914286	0.914286	0.914286	0.914286	0.914286	0.914286	0.914286	0.914286	0.914286	0.914286	0.914286	0.914286	0.914286	0.914286	0.914286	0.914286	0.914286	0.914286	0.914286	0.914286	0.914286	0.914286	0.914286	0.914286	0.914286	0.914286	0.914286	0.914286	0.914286	0.914286	0.914286
Average AT2		0.380952	0.380952	0.380952	0.380952	0.380952	0.380952	0.380952	0.380952	0.380952	0.380952	0.380952	0.380952	0.380952	0.380952	0.380952	0.380952	0.380952	0.380952	0.380952	0.380952	0.380952	0.380952	0.380952	0.380952	0.380952	0.380952	0.380952	0.380952	0.380952	0.380952	0.380952	0.380952	0.380952	0.380952
AT1: HW 11		1	0.9	0.9	0.9	0.9	0.9	0.9
AT2:Q5 Final Term Exam		0.666667	0.5	0	0.5	0.5	0.5	0
																								Number of students achieving CLO
																								7
																								1

## Sheet: Indirect Assessment
STUDENT COURSE EXIT SURVEY FOR CLOs -SCORE (1 - 5)
Student #	1	2	3	4	5	6	7	8	9	10	11	12	13	14	15	16	17	18	19	20	21	22	23	24	25	26	27	28	29	30	Average
CLO1	3	4	4	5	5	5																									4.33333
CLO2	5	5	4	4	4	3																									4.16667
CLO3	5	5	5	5	5	4																									4.83333
CLO4	5	5	5	4	3	3																									4.16667
CLO5	5	5	5	5	4	3																									4.5
CLO6	5	5	5	5	4	4																									4.66667
CLO7	5	5	5	4	4	4																									4.5
CLO8
CLO9
CLO10
CLO11
CLO12
CLO13
CLO14
CLO15
CLO16
CLO17
CLO18
CLO19
CLO20
Target	3	3	3	3	3	3	3	3	3	3	3	3	3	3	3	3	3	3	3	3	3	3	3	3	3	3	3	3	3	3	3
Average of CLO 1	4.33333	4.33333	4.33333	4.33333	4.33333	4.33333
Average CLO 2	4.16667	4.16667	4.16667	4.16667	4.16667	4.16667
Average CLO 3	4.83333	4.83333	4.83333	4.83333	4.83333	4.83333
Average CLO 4	4.16667	4.16667	4.16667	4.16667	4.16667	4.16667
Average CLO 5	4.5	4.5	4.5	4.5	4.5	4.5
Average CLO 6	4.66667	4.66667	4.66667	4.66667	4.66667	4.66667
Average CLO 7	4.5	4.5	4.5	4.5	4.5	4.5

## Sheet: Grade
Oxides	wt%	Mol wt	Mol Prop	cations	Anions	No Cations	Cations Norm	No Anions	Anions Norm
SiO2	0	60.085	0	1	2	0	0	0	0
MgO	0.65	40.311	0.0161246	1	1	0.0161246	0.0265914	0.0161246	0.0265914
MnO	0.33	70.937	0.00465202	1	1	0.00465202	0.00767172	0.00465202	0.00767172
CaO	0	56.079	0	1	1	0	0	0	0
ZnO	0	81.41	0	1	1	0	0	0	0
FeO	45.96	71.846	0.639702	1	1	0.639702	1.05494	0.639702	1.05494
Al2O3	0	101.962	0	2	3	0	0	0	0
V2O3	0.39	149.88	0.00260208	2	3	0.00520416	0.00858228	0.00780624	0.0128734
Cr2O3	0	152	0	2	3	0	0	0	0
Na2O	0	61.979	0	2	1	0	0	0	0
K2O	0	94.203	0	2	1	0	0	0	0
TiO2	45.96	79.87	0.575435	1	2	0.575435	0.94896	1.15087	1.89792
O factor	1.64912
Ferric	0.137043
New Fe	1.03085
Ferrous	0.893805
FeO%	39.85
Fe2O3%	6.78822
Mollec Form											Fe ferrous	Fe ferric	Other cations	Ti	O
											0.893805	0.137043	0.0428454	0.927285	3
					2/S		S
Total	93.29				0.97716	1.24112	2.04675	1.81915	3
Total	93.9682
