# Supplementary material
Source: MDPI journal article supplement (https://www.mdpi.com/2076-3263/13/6/170)
Supplement: s1 [file s1 › File S2 - Ilmenite 2.xlsx]

## Sheet: Direct Assessment of CLO 1
CLO1
Student #	Max	1	2	3	4	5	6	7	8	9	10	11	12	13	14	15	16	17	18	19	20	21	22	23	24	25	26	27	28	29	30	31	32	33	34	Average
AT1: Quiz 1	10	10	10	8	8	10																														9.2
AT2:Q1 Mid-Term Exam	10	7	10	10	10	10	6	10																												9
AT3
AT4
AT5
AT6
AT7
AT8
AT9
AT10
AT11
AT12
AT13
AT14
AT15
AT16
AT17
AT18
AT19
AT20
Student #		1	2	3	4	5	6	7	8	9	10	11	12	13	14	15	16	17	18	19	20	21	22	23	24	25	26	27	28	29	30	31	32	33	34
Target		0.7	0.7	0.7	0.7	0.7	0.7	0.7	0.7	0.7	0.7	0.7	0.7	0.7	0.7	0.7	0.7	0.7	0.7	0.7	0.7	0.7	0.7	0.7	0.7	0.7	0.7	0.7	0.7	0.7	0.7	0.7	0.7	0.7	0.7
Average AT1		0.92	0.92	0.92	0.92	0.92	0.92	0.92	0.92	0.92	0.92	0.92	0.92	0.92	0.92	0.92	0.92	0.92	0.92	0.92	0.92	0.92	0.92	0.92	0.92	0.92	0.92	0.92	0.92	0.92	0.92	0.92	0.92	0.92	0.92
Average AT2		0.9	0.9	0.9	0.9	0.9	0.9	0.9	0.9	0.9	0.9	0.9	0.9	0.9	0.9	0.9	0.9	0.9	0.9	0.9	0.9	0.9	0.9	0.9	0.9	0.9	0.9	0.9	0.9	0.9	0.9	0.9	0.9	0.9	0.9
AT1: Quiz 1		1	1	0.8	0.8	1	0	0
AT2:Q1 Mid-Term Exam		0.7	1	1	1	1	0.6	1
																								Number of students achieving CLO
																								5
																								6

## Sheet: Direct Assessment of CLO 2
CLO1
Student #	Max	1	2	3	4	5	6	7	8	9	10	11	12	13	14	15	16	17	18	19	20	21	22	23	24	25	26	27	28	29	30	31	32	33	34	Average
AT1: Quiz 1	10	10	10	8	6	9																														8.6
AT2:Q1 Mid-Term Exam	10	9	10	4	6	8	10	8																												7.85714
AT3
AT4
AT5
AT6
AT7
AT8
AT9
AT10
AT11
AT12
AT13
AT14
AT15
AT16
AT17
AT18
AT19
AT20
Student #		1	2	3	4	5	6	7	8	9	10	11	12	13	14	15	16	17	18	19	20	21	22	23	24	25	26	27	28	29	30	31	32	33	34
Target		0.7	0.7	0.7	0.7	0.7	0.7	0.7	0.7	0.7	0.7	0.7	0.7	0.7	0.7	0.7	0.7	0.7	0.7	0.7	0.7	0.7	0.7	0.7	0.7	0.7	0.7	0.7	0.7	0.7	0.7	0.7	0.7	0.7	0.7
Average AT1		0.86	0.86	0.86	0.86	0.86	0.86	0.86	0.86	0.86	0.86	0.86	0.86	0.86	0.86	0.86	0.86	0.86	0.86	0.86	0.86	0.86	0.86	0.86	0.86	0.86	0.86	0.86	0.86	0.86	0.86	0.86	0.86	0.86	0.86
Average AT2		0.785714	0.785714	0.785714	0.785714	0.785714	0.785714	0.785714	0.785714	0.785714	0.785714	0.785714	0.785714	0.785714	0.785714	0.785714	0.785714	0.785714	0.785714	0.785714	0.785714	0.785714	0.785714	0.785714	0.785714	0.785714	0.785714	0.785714	0.785714	0.785714	0.785714	0.785714	0.785714	0.785714	0.785714
AT1: Quiz 1		1	1	0.8	0.6	0.9	0	0
AT2:Q1 Mid-Term Exam		0.9	1	0.4	0.6	0.8	1	0.8
																								Number of students achieving CLO
																								4
																								5

## Sheet: Direct Assessment of CLO 3
CLO1
Student #	Max	1	2	3	4	5	6	7	8	9	10	11	12	13	14	15	16	17	18	19	20	21	22	23	24	25	26	27	28	29	30	31	32	33	34	Average
AT1: Quiz 2	10	9	10	9	9	9	8	10																												9.14286
AT2:Q1 Mid-Term Exam	10	9	10	5	9	6	10	8																												8.14286
AT3
AT4
AT5
AT6
AT7
AT8
AT9
AT10
AT11
AT12
AT13
AT14
AT15
AT16
AT17
AT18
AT19
AT20
Student #		1	2	3	4	5	6	7	8	9	10	11	12	13	14	15	16	17	18	19	20	21	22	23	24	25	26	27	28	29	30	31	32	33	34
Target		0.7	0.7	0.7	0.7	0.7	0.7	0.7	0.7	0.7	0.7	0.7	0.7	0.7	0.7	0.7	0.7	0.7	0.7	0.7	0.7	0.7	0.7	0.7	0.7	0.7	0.7	0.7	0.7	0.7	0.7	0.7	0.7	0.7	0.7
Average AT1		0.914286	0.914286	0.914286	0.914286	0.914286	0.914286	0.914286	0.914286	0.914286	0.914286	0.914286	0.914286	0.914286	0.914286	0.914286	0.914286	0.914286	0.914286	0.914286	0.914286	0.914286	0.914286	0.914286	0.914286	0.914286	0.914286	0.914286	0.914286	0.914286	0.914286	0.914286	0.914286	0.914286	0.914286
Average AT2		0.814286	0.814286	0.814286	0.814286	0.814286	0.814286	0.814286	0.814286	0.814286	0.814286	0.814286	0.814286	0.814286	0.814286	0.814286	0.814286	0.814286	0.814286	0.814286	0.814286	0.814286	0.814286	0.814286	0.814286	0.814286	0.814286	0.814286	0.814286	0.814286	0.814286	0.814286	0.814286	0.814286	0.814286
AT1: Quiz 2		0.9	1	0.9	0.9	0.9	0.8	1
AT2:Q1 Mid-Term Exam		0.9	1	0.5	0.9	0.6	1	0.8
																								Number of students achieving CLO
																								7
																								5

## Sheet: Direct Assessment of CLO 4
CLO1
Student #	Max	1	2	3	4	5	6	7	8	9	10	11	12	13	14	15	16	17	18	19	20	21	22	23	24	25	26	27	28	29	30	31	32	33	34	Average
AT1: Quiz 3	10	5	10	10	10	10	10	10																												9.28571
AT2:Q2 Mid-Term Exam	10	7	8	7	8	7	8	7																												7.42857
AT3
AT4
AT5
AT6
AT7
AT8
AT9
AT10
AT11
AT12
AT13
AT14
AT15
AT16
AT17
AT18
AT19
AT20
Student #		1	2	3	4	5	6	7	8	9	10	11	12	13	14	15	16	17	18	19	20	21	22	23	24	25	26	27	28	29	30	31	32	33	34
Target		0.7	0.7	0.7	0.7	0.7	0.7	0.7	0.7	0.7	0.7	0.7	0.7	0.7	0.7	0.7	0.7	0.7	0.7	0.7	0.7	0.7	0.7	0.7	0.7	0.7	0.7	0.7	0.7	0.7	0.7	0.7	0.7	0.7	0.7
Average AT1		0.928571	0.928571	0.928571	0.928571	0.928571	0.928571	0.928571	0.928571	0.928571	0.928571	0.928571	0.928571	0.928571	0.928571	0.928571	0.928571	0.928571	0.928571	0.928571	0.928571	0.928571	0.928571	0.928571	0.928571	0.928571	0.928571	0.928571	0.928571	0.928571	0.928571	0.928571	0.928571	0.928571	0.928571
Average AT2		0.742857	0.742857	0.742857	0.742857	0.742857	0.742857	0.742857	0.742857	0.742857	0.742857	0.742857	0.742857	0.742857	0.742857	0.742857	0.742857	0.742857	0.742857	0.742857	0.742857	0.742857	0.742857	0.742857	0.742857	0.742857	0.742857	0.742857	0.742857	0.742857	0.742857	0.742857	0.742857	0.742857	0.742857
AT1: Quiz 3		0.5	1	1	1	1	1	1
AT2:Q2 Mid-Term Exam		0.7	0.8	0.7	0.8	0.7	0.8	0.7
																								Number of students achieving CLO
																								6
																								7

## Sheet: Direct Assessment of CLO 5
CLO1
Student #	Max	1	2	3	4	5	6	7	8	9	10	11	12	13	14	15	16	17	18	19	20	21	22	23	24	25	26	27	28	29	30	31	32	33	34	Average
AT1: Quiz 5	10	10	8	10	10	9	6	7																												8.57143
AT2:Q3 Mid-Term Exam	6	6	1	2	3	1	5	0																												2.57143
AT3
AT4
AT5
AT6
AT7
AT8
AT9
AT10
AT11
AT12
AT13
AT14
AT15
AT16
AT17
AT18
AT19
AT20
Student #		1	2	3	4	5	6	7	8	9	10	11	12	13	14	15	16	17	18	19	20	21	22	23	24	25	26	27	28	29	30	31	32	33	34
Target		0.7	0.7	0.7	0.7	0.7	0.7	0.7	0.7	0.7	0.7	0.7	0.7	0.7	0.7	0.7	0.7	0.7	0.7	0.7	0.7	0.7	0.7	0.7	0.7	0.7	0.7	0.7	0.7	0.7	0.7	0.7	0.7	0.7	0.7
Average AT1		0.857143	0.857143	0.857143	0.857143	0.857143	0.857143	0.857143	0.857143	0.857143	0.857143	0.857143	0.857143	0.857143	0.857143	0.857143	0.857143	0.857143	0.857143	0.857143	0.857143	0.857143	0.857143	0.857143	0.857143	0.857143	0.857143	0.857143	0.857143	0.857143	0.857143	0.857143	0.857143	0.857143	0.857143
Average AT2		0.428571	0.428571	0.428571	0.428571	0.428571	0.428571	0.428571	0.428571	0.428571	0.428571	0.428571	0.428571	0.428571	0.428571	0.428571	0.428571	0.428571	0.428571	0.428571	0.428571	0.428571	0.428571	0.428571	0.428571	0.428571	0.428571	0.428571	0.428571	0.428571	0.428571	0.428571	0.428571	0.428571	0.428571
AT1: Quiz 5		1	0.8	1	1	0.9	0.6	0.7
AT2:Q3 Mid-Term Exam		1	0.166667	0.333333	0.5	0.166667	0.833333	0
																								Number of students achieving CLO
																								6
																								2

## Sheet: Direct Assessment of CLO 6
CLO1
Student #	Max	1	2	3	4	5	6	7	8	9	10	11	12	13	14	15	16	17	18	19	20	21	22	23	24	25	26	27	28	29	30	31	32	33	34	Average
AT1: Quiz 6	10	9	10	8	7	9	10	8																												8.71429
AT2:HW 10	10	9	10	9	9	9	9	9																												9.14286
AT3
AT4
AT5
AT6
AT7
AT8
AT9
AT10
AT11
AT12
AT13
AT14
AT15
AT16
AT17
AT18
AT19
AT20
Student #		1	2	3	4	5	6	7	8	9	10	11	12	13	14	15	16	17	18	19	20	21	22	23	24	25	26	27	28	29	30	31	32	33	34
Target		0.7	0.7	0.7	0.7	0.7	0.7	0.7	0.7	0.7	0.7	0.7	0.7	0.7	0.7	0.7	0.7	0.7	0.7	0.7	0.7	0.7	0.7	0.7	0.7	0.7	0.7	0.7	0.7	0.7	0.7	0.7	0.7	0.7	0.7
Average AT1		0.871429	0.871429	0.871429	0.871429	0.871429	0.871429	0.871429	0.871429	0.871429	0.871429	0.871429	0.871429	0.871429	0.871429	0.871429	0.871429	0.871429	0.871429	0.871429	0.871429	0.871429	0.871429	0.871429	0.871429	0.871429	0.871429	0.871429	0.871429	0.871429	0.871429	0.871429	0.871429	0.871429	0.871429
Average AT2		0.914286	0.914286	0.914286	0.914286	0.914286	0.914286	0.914286	0.914286	0.914286	0.914286	0.914286	0.914286	0.914286	0.914286	0.914286	0.914286	0.914286	0.914286	0.914286	0.914286	0.914286	0.914286	0.914286	0.914286	0.914286	0.914286	0.914286	0.914286	0.914286	0.914286	0.914286	0.914286	0.914286	0.914286
AT1: Quiz 6		0.9	1	0.8	0.7	0.9	1	0.8
AT2:HW10		0.9	1	0.9	0.9	0.9	0.9	0.9
																								Number of students achieving CLO
																								7
																								7

## Sheet: Direct Assessment of CLO 7
CLO1
Student #	Max	1	2	3	4	5	6	7	8	9	10	11	12	13	14	15	16	17	18	19	20	21	22	23	24	25	26	27	28	29	30	31	32	33	34	Average
AT1: HW 11	10	10	9	9	9	9	9	9																												9.14286
AT2:Q5 Final-Exam	6	4	3	0	3	3	3	0																												2.28571
AT3
AT4
AT5
AT6
AT7
AT8
AT9
AT10
AT11
AT12
AT13
AT14
AT15
AT16
AT17
AT18
AT19
AT20
Student #		1	2	3	4	5	6	7	8	9	10	11	12	13	14	15	16	17	18	19	20	21	22	23	24	25	26	27	28	29	30	31	32	33	34
Target		0.6	0.6	0.6	0.6	0.6	0.6	0.6	0.6	0.6	0.6	0.6	0.6	0.6	0.6	0.6	0.6	0.6	0.6	0.6	0.6	0.6	0.6	0.6	0.6	0.6	0.6	0.6	0.6	0.6	0.6	0.6	0.6	0.6	0.6
Average AT1		0.914286	0.914286	0.914286	0.914286	0.914286	0.914286	0.914286	0.914286	0.914286	0.914286	0.914286	0.914286	0.914286	0.914286	0.914286	0.914286	0.914286	0.914286	0.914286	0.914286	0.914286	0.914286	0.914286	0.914286	0.914286	0.914286	0.914286	0.914286	0.914286	0.914286	0.914286	0.914286	0.914286	0.914286
Average AT2		0.380952	0.380952	0.380952	0.380952	0.380952	0.380952	0.380952	0.380952	0.380952	0.380952	0.380952	0.380952	0.380952	0.380952	0.380952	0.380952	0.380952	0.380952	0.380952	0.380952	0.380952	0.380952	0.380952	0.380952	0.380952	0.380952	0.380952	0.380952	0.380952	0.380952	0.380952	0.380952	0.380952	0.380952
AT1: HW 11		1	0.9	0.9	0.9	0.9	0.9	0.9
AT2:Q5 Final Term Exam		0.666667	0.5	0	0.5	0.5	0.5	0
																								Number of students achieving CLO
																								7
																								1

## Sheet: Indirect Assessment
STUDENT COURSE EXIT SURVEY FOR CLOs -SCORE (1 - 5)
Student #	1	2	3	4	5	6	7	8	9	10	11	12	13	14	15	16	17	18	19	20	21	22	23	24	25	26	27	28	29	30	Average
CLO1	3	4	4	5	5	5																									4.33333
CLO2	5	5	4	4	4	3																									4.16667
CLO3	5	5	5	5	5	4																									4.83333
CLO4	5	5	5	4	3	3																									4.16667
CLO5	5	5	5	5	4	3																									4.5
CLO6	5	5	5	5	4	4																									4.66667
CLO7	5	5	5	4	4	4																									4.5
CLO8
CLO9
CLO10
CLO11
CLO12
CLO13
CLO14
CLO15
CLO16
CLO17
CLO18
CLO19
CLO20
Target	3	3	3	3	3	3	3	3	3	3	3	3	3	3	3	3	3	3	3	3	3	3	3	3	3	3	3	3	3	3	3
Average of CLO 1	4.33333	4.33333	4.33333	4.33333	4.33333	4.33333
Average CLO 2	4.16667	4.16667	4.16667	4.16667	4.16667	4.16667
Average CLO 3	4.83333	4.83333	4.83333	4.83333	4.83333	4.83333
Average CLO 4	4.16667	4.16667	4.16667	4.16667	4.16667	4.16667
Average CLO 5	4.5	4.5	4.5	4.5	4.5	4.5
Average CLO 6	4.66667	4.66667	4.66667	4.66667	4.66667	4.66667
Average CLO 7	4.5	4.5	4.5	4.5	4.5	4.5

## Sheet: Grade
No	Oxides	SiO2	MgO	MnO	CaO	ZnO	FeO	Al2O3	V2O3	Cr2O3	Na2O	K2O	TiO2		New total	Total		Mol wt													cations													Charge
1	wt%	0	0.04	2.33	0	0.02	46.2	0	0.01	0.02	0	0	49.56		98.6313	98.18		60.085	40.311	70.937	56.079	81.41	71.85	101.962	149.88	152	61.979	94.203	79.87		1	1	1	1	1	1	2	2	2	2	2	1		4	2	2	2	2	2
2	wt%	0	0.65	0.33	0	0	45.96	0	0.39	0	0	0	45.96		93.968	93.29		60.085	40.311	70.937	56.079	81.41	71.85	101.962	149.88	152	61.979	94.203	79.87		1	1	1	1	1	1	2	2	2	2	2	1		4	2	2	2	2	2
3	wt%	0	0.638	0.331	0	0.029	45.486	0	0.5	0	0	0	46.151		93.7419	93.135		60.085	40.311	70.937	56.079	81.41	71.85	101.962	149.88	152	61.979	94.203	79.87		1	1	1	1	1	1	2	2	2	2	2	1		4	2	2	2	2	2
4	wt%	0	0.643	0.328	0.006	0	45.769	0	0.459	0.013	0	0	46.534		94.3507	93.752		60.085	40.311	70.937	56.079	81.41	71.85	101.962	149.88	152	61.979	94.203	79.87		1	1	1	1	1	1	2	2	2	2	2	1		4	2	2	2	2	2
5	wt%	0	0.562	0.254	0.004	0.029	45.657	0	0.525	0	0	0	46.659		94.242	93.69		60.085	40.311	70.937	56.079	81.41	71.85	101.962	149.88	152	61.979	94.203	79.87		1	1	1	1	1	1	2	2	2	2	2	1		4	2	2	2	2	2
6	wt%	0	0.663	0.364	0.021	0.01	45.93	0	0.388	0.009	0	0	46.841		94.823	94.226		60.085	40.311	70.937	56.079	81.41	71.85	101.962	149.88	152	61.979	94.203	79.87		1	1	1	1	1	1	2	2	2	2	2	1		4	2	2	2	2	2
7	wt%	0	0.529	0.328	0	0.029	45.363	0	0.527	0.053	0	0	47.058		94.3677	93.887		60.085	40.311	70.937	56.079	81.41	71.85	101.962	149.88	152	61.979	94.203	79.87		1	1	1	1	1	1	2	2	2	2	2	1		4	2	2	2	2	2
8	wt%	0	0.625	0.25	0.007	0.097	45.688	0	0.449	0	0	0	47.66		95.2506	94.776		60.085	40.311	70.937	56.079	81.41	71.85	101.962	149.88	152	61.979	94.203	79.87		1	1	1	1	1	1	2	2	2	2	2	1		4	2	2	2	2	2
9	wt%	0	0.423	0.227	0.006	0.11	44.943	0	0.455	0	0	0	48.087		94.5588	94.251		60.085	40.311	70.937	56.079	81.41	71.85	101.962	149.88	152	61.979	94.203	79.87		1	1	1	1	1	1	2	2	2	2	2	1		4	2	2	2	2	2
10	wt%	0	0.613	0.386	0	0.066	44.836	0	0.493	0.003	0	0	51.502		97.9043	97.899		60.085	40.311	70.937	56.079	81.41	71.85	101.962	149.88	152	61.979	94.203	79.87		1	1	1	1	1	1	2	2	2	2	2	1		4	2	2	2	2	2
11	wt%	18.819	0.698	0.455	0.256	0.05	39.6107	0.06	0.358	0.082	0	0	40.171		98.6779	100.56		60.085	40.311	70.937	56.079	81.41	71.85	101.962	149.88	152	61.979	94.203	79.87		1	1	1	1	1	1	2	2	2	2	2	1		4	2	2	2	2	2
12	wt%	0	0.86	0.57	0.32	0.06	48.72	0.07	0.44	0.1	0	0	49.41		101.31	100.55		60.085	40.311	70.937	56.079	81.41	71.85	101.962	149.88	152	61.979	94.203	79.87		1	1	1	1	1	1	2	2	2	2	2	1		4	2	2	2	2	2
13	wt%	0	1.192	0.602	0	0.032	47.6749	0.025	0.421	0.007	0	0	50.334		100.86	100.288		60.085	40.311	70.937	56.079	81.41	71.85	101.962	149.88	152	61.979	94.203	79.87		1	1	1	1	1	1	2	2	2	2	2	1		4	2	2	2	2	2
14	wt%	0	1.187	0.673	0.011	0	48.0042	0.009	0.416	0	0	0	50.599		101.487	100.899		60.085	40.311	70.937	56.079	81.41	71.85	101.962	149.88	152	61.979	94.203	79.87		1	1	1	1	1	1	2	2	2	2	2	1		4	2	2	2	2	2
15	wt%	0	1.162	0.569	0.01	0	48.1527	0	0.452	0	0	0	50.824		101.735	101.17		60.085	40.311	70.937	56.079	81.41	71.85	101.962	149.88	152	61.979	94.203	79.87		1	1	1	1	1	1	2	2	2	2	2	1		4	2	2	2	2	2
16	wt%	0	1.257	0.594	0.024	0	47.1755	0.021	0.447	0	0	0	50.903		100.894	100.421		60.085	40.311	70.937	56.079	81.41	71.85	101.962	149.88	152	61.979	94.203	79.87		1	1	1	1	1	1	2	2	2	2	2	1		4	2	2	2	2	2
17	wt%	0	1.124	0.518	0.031	0.142	46.127	0.004	0.45	0.01	0	0	48.608		97.5793	97.014		60.085	40.311	70.937	56.079	81.41	71.85	101.962	149.88	152	61.979	94.203	79.87		1	1	1	1	1	1	2	2	2	2	2	1		4	2	2	2	2	2
18	wt%	0	1.131	0.42	0.01	0.016	46.298	0	0.483	0.022	0	0	48.576		97.5185	96.956		60.085	40.311	70.937	56.079	81.41	71.85	101.962	149.88	152	61.979	94.203	79.87		1	1	1	1	1	1	2	2	2	2	2	1		4	2	2	2	2	2
19	wt%	0	1.177	0.427	0.004	0	45.737	0.006	0.403	0	0	0	48.973		97.1951	96.727		60.085	40.311	70.937	56.079	81.41	71.85	101.962	149.88	152	61.979	94.203	79.87		1	1	1	1	1	1	2	2	2	2	2	1		4	2	2	2	2	2
20	wt%	0	1.172	0.476	0.014	0.072	46.002	0	0.447	0.041	0	0	48.968		97.703	97.192		60.085	40.311	70.937	56.079	81.41	71.85	101.962	149.88	152	61.979	94.203	79.87		1	1	1	1	1	1	2	2	2	2	2	1		4	2	2	2	2	2
21	wt%	0.004	1.132	0.466	0.042	0.036	45.548	0	0.459	0.031	0	0	49		97.1663	96.718		60.085	40.311	70.937	56.079	81.41	71.85	101.962	149.88	152	61.979	94.203	79.87		1	1	1	1	1	1	2	2	2	2	2	1		4	2	2	2	2	2
22	wt%	0.017	1.111	0.497	0.003	0.06	45.911	0.017	0.402	0.018	0	0	49.021		97.5379	97.057		60.085	40.311	70.937	56.079	81.41	71.85	101.962	149.88	152	61.979	94.203	79.87		1	1	1	1	1	1	2	2	2	2	2	1		4	2	2	2	2	2
23	wt%	0	1.157	0.402	0	0	45.406	0	0.399	0.037	0	0	49.085		96.8988	96.486		60.085	40.311	70.937	56.079	81.41	71.85	101.962	149.88	152	61.979	94.203	79.87		1	1	1	1	1	1	2	2	2	2	2	1		4	2	2	2	2	2
24	wt%	0	1.22	0.44	0.011	0	45.576	0.002	0.444	0.02	0	0	49.168		97.3227	96.881		60.085	40.311	70.937	56.079	81.41	71.85	101.962	149.88	152	61.979	94.203	79.87		1	1	1	1	1	1	2	2	2	2	2	1		4	2	2	2	2	2
25	wt%	0	1.061	0.461	0	0	45.513	0	0.452	0.047	0	0	49.222		97.1547	96.756		60.085	40.311	70.937	56.079	81.41	71.85	101.962	149.88	152	61.979	94.203	79.87		1	1	1	1	1	1	2	2	2	2	2	1		4	2	2	2	2	2
26	wt%	0	1.205	0.473	0	0.046	46.223	0	0.393	0	0	0	49.42		98.2521	97.76		60.085	40.311	70.937	56.079	81.41	71.85	101.962	149.88	152	61.979	94.203	79.87		1	1	1	1	1	1	2	2	2	2	2	1		4	2	2	2	2	2
27	wt%	0	1.19	0.531	0.017	0.032	45.449	0	0.377	0.012	0	0	49.462		97.4765	97.07		60.085	40.311	70.937	56.079	81.41	71.85	101.962	149.88	152	61.979	94.203	79.87		1	1	1	1	1	1	2	2	2	2	2	1		4	2	2	2	2	2
28	wt%	0	1.25	0.457	0.004	0.014	45.474	0.009	0.455	0.026	0	0	49.677		97.7538	97.366		60.085	40.311	70.937	56.079	81.41	71.85	101.962	149.88	152	61.979	94.203	79.87		1	1	1	1	1	1	2	2	2	2	2	1		4	2	2	2	2	2
29	wt%	0	1.338	0.436	0	0.01	42.314	0.006	0.468	0.023	0	0	50.778		95.3142	95.373		60.085	40.311	70.937	56.079	81.41	71.85	101.962	149.88	152	61.979	94.203	79.87		1	1	1	1	1	1	2	2	2	2	2	1		4	2	2	2	2	2
30	wt%	0.03	0.987	0.443	0.035	0.055	39.747	0.006	0.374	0.035	0	0	50.883		92.1775	92.595		60.085	40.311	70.937	56.079	81.41	71.85	101.962	149.88	152	61.979	94.203	79.87		1	1	1	1	1	1	2	2	2	2	2	1		4	2	2	2	2	2
31	wt%	0	1.401	0.622	0.003	0.088	47.6336	0.028	0.371	0.003	0	0	50.484		101.236	100.634		60.085	40.311	70.937	56.079	81.41	71.85	101.962	149.88	152	61.979	94.203	79.87		1	1	1	1	1	1	2	2	2	2	2	1		4	2	2	2	2	2
32	wt%	0	1.28	0.564	0.004	0.022	46.9696	0.004	0.465	0.032	0	0	50.598		100.419	99.9386		60.085	40.311	70.937	56.079	81.41	71.85	101.962	149.88	152	61.979	94.203	79.87		1	1	1	1	1	1	2	2	2	2	2	1		4	2	2	2	2	2
33	wt%	0	1.298	0.544	0.006	0.042	47.065	0.011	0.446	0.032	0	0	50.644		100.578	100.088		60.085	40.311	70.937	56.079	81.41	71.85	101.962	149.88	152	61.979	94.203	79.87		1	1	1	1	1	1	2	2	2	2	2	1		4	2	2	2	2	2
34	wt%	0	1.313	0.555	0.028	0	47.3763	0.036	0.424	0.019	0	0	50.91		101.163	100.661		60.085	40.311	70.937	56.079	81.41	71.85	101.962	149.88	152	61.979	94.203	79.87		1	1	1	1	1	1	2	2	2	2	2	1		4	2	2	2	2	2
35	wt%	0	1.25	0.516	0	0.147	46.8553	0	0.443	0.01	0	0	51.001		100.65	100.222		60.085	40.311	70.937	56.079	81.41	71.85	101.962	149.88	152	61.979	94.203	79.87		1	1	1	1	1	1	2	2	2	2	2	1		4	2	2	2	2	2
36	wt%	0	1.363	0.643	0.013	0.121	46.7365	0	0.377	0.085	0	0	51.051		100.835	100.39		60.085	40.311	70.937	56.079	81.41	71.85	101.962	149.88	152	61.979	94.203	79.87		1	1	1	1	1	1	2	2	2	2	2	1		4	2	2	2	2	2
37	wt%	0	1.318	0.54	0.007	0.02	47.7335	0.008	0.408	0.031	0	0	51.333		101.896	101.398		60.085	40.311	70.937	56.079	81.41	71.85	101.962	149.88	152	61.979	94.203	79.87		1	1	1	1	1	1	2	2	2	2	2	1		4	2	2	2	2	2
38	wt%	0	1.317	0.43	0	0.062	45.341	0.026	0.466	0	0	0	49.237		97.3103	96.879		60.085	40.311	70.937	56.079	81.41	71.85	101.962	149.88	152	61.979	94.203	79.87		1	1	1	1	1	1	2	2	2	2	2	1		4	2	2	2	2	2
39	wt%	0	1.411	0.493	0	0.078	44.839	0	0.525	0	0	0	49.405		97.1371	96.751		60.085	40.311	70.937	56.079	81.41	71.85	101.962	149.88	152	61.979	94.203	79.87		1	1	1	1	1	1	2	2	2	2	2	1		4	2	2	2	2	2
40	wt%	0	1.403	0.447	0	0.052	44.916	0.023	0.509	0.015	0	0	49.415		97.1643	96.78		60.085	40.311	70.937	56.079	81.41	71.85	101.962	149.88	152	61.979	94.203	79.87		1	1	1	1	1	1	2	2	2	2	2	1		4	2	2	2	2	2
41	wt%	0	1.373	0.47	0.02	0.059	44.938	0.03	0.468	0.007	0	0	49.442		97.1912	96.807		60.085	40.311	70.937	56.079	81.41	71.85	101.962	149.88	152	61.979	94.203	79.87		1	1	1	1	1	1	2	2	2	2	2	1		4	2	2	2	2	2
42	wt%	0	1.399	0.451	0.014	0.046	45.477	0.04	0.437	0.003	0	0	49.93		98.1932	97.797		60.085	40.311	70.937	56.079	81.41	71.85	101.962	149.88	152	61.979	94.203	79.87		1	1	1	1	1	1	2	2	2	2	2	1		4	2	2	2	2	2
43	wt%	0.06	0.642	0.471	0.011	0	46.439	0	0.422	0	0	0	45.772		94.5748	93.817		60.085	40.311	70.937	56.079	81.41	71.85	101.962	149.88	152	61.979	94.203	79.87		1	1	1	1	1	1	2	2	2	2	2	1		4	2	2	2	2	2
44	wt%	0	1.244	0.418	0.017	0.07	46.843	0.053	0.475	0.006	0	0	48.826		98.5785	97.952		60.085	40.311	70.937	56.079	81.41	71.85	101.962	149.88	152	61.979	94.203	79.87		1	1	1	1	1	1	2	2	2	2	2	1		4	2	2	2	2	2
45	wt%	0	1.212	0.43	0.021	0	47.194	0.036	0.455	0	0	0	48.885		98.8813	98.233		60.085	40.311	70.937	56.079	81.41	71.85	101.962	149.88	152	61.979	94.203	79.87		1	1	1	1	1	1	2	2	2	2	2	1		4	2	2	2	2	2
46	wt%	0	1.282	0.442	0	0	46.406	0.017	0.419	0	0	0	49.011		98.1374	97.577		60.085	40.311	70.937	56.079	81.41	71.85	101.962	149.88	152	61.979	94.203	79.87		1	1	1	1	1	1	2	2	2	2	2	1		4	2	2	2	2	2
47	wt%	0.006	1.323	0.532	0	0.024	46.181	0.015	0.472	0.028	0	0	49.4		98.4974	97.981		60.085	40.311	70.937	56.079	81.41	71.85	101.962	149.88	152	61.979	94.203	79.87		1	1	1	1	1	1	2	2	2	2	2	1		4	2	2	2	2	2
48	wt%	0	1.282	0.483	0	0.036	46.306	0.021	0.391	0.053	0	0	49.744		98.8003	98.316		60.085	40.311	70.937	56.079	81.41	71.85	101.962	149.88	152	61.979	94.203	79.87		1	1	1	1	1	1	2	2	2	2	2	1		4	2	2	2	2	2
49	wt%	0.068	1.06	0.42	0.024	0.04	41.66	0.021	0.413	0.034	0	0	46.287		90.2846	90.027		60.085	40.311	70.937	56.079	81.41	71.85	101.962	149.88	152	61.979	94.203	79.87		1	1	1	1	1	1	2	2	2	2	2	1		4	2	2	2	2	2
50	wt%	0	1.632	0.542	0.015	0.102	45.595	0	0.527	0.01	0	0	49.278		98.2374	97.701		60.085	40.311	70.937	56.079	81.41	71.85	101.962	149.88	152	61.979	94.203	79.87		1	1	1	1	1	1	2	2	2	2	2	1		4	2	2	2	2	2
51	wt%	0	1.648	0.487	0.013	0.03	45.671	0.019	0.54	0.016	0	0	49.45		98.3913	97.874		60.085	40.311	70.937	56.079	81.41	71.85	101.962	149.88	152	61.979	94.203	79.87		1	1	1	1	1	1	2	2	2	2	2	1		4	2	2	2	2	2
52	wt%	0	1.61	0.475	0	0.124	45.318	0.025	0.519	0.02	0	0	49.839		98.3678	97.93		60.085	40.311	70.937	56.079	81.41	71.85	101.962	149.88	152	61.979	94.203	79.87		1	1	1	1	1	1	2	2	2	2	2	1		4	2	2	2	2	2
53	wt%	0	1.622	0.582	0	0.02	45.306	0.025	0.502	0.004	0	0	49.872		98.3703	97.933		60.085	40.311	70.937	56.079	81.41	71.85	101.962	149.88	152	61.979	94.203	79.87		1	1	1	1	1	1	2	2	2	2	2	1		4	2	2	2	2	2
54	wt%	0	1.65	0.527	0.028	0.154	45.436	0.04	0.533	0.039	0	0	49.92		98.7904	98.327		60.085	40.311	70.937	56.079	81.41	71.85	101.962	149.88	152	61.979	94.203	79.87		1	1	1	1	1	1	2	2	2	2	2	1		4	2	2	2	2	2
55	wt%	0	1.587	0.466	0.024	0.056	45.702	0.034	0.474	0.007	0	0	49.997		98.8028	98.347		60.085	40.311	70.937	56.079	81.41	71.85	101.962	149.88	152	61.979	94.203	79.87		1	1	1	1	1	1	2	2	2	2	2	1		4	2	2	2	2	2
56	wt%	0	1.544	0.529	0.017	0	45.118	0.074	0.493	0	0	0	50.122		98.2676	97.897		60.085	40.311	70.937	56.079	81.41	71.85	101.962	149.88	152	61.979	94.203	79.87		1	1	1	1	1	1	2	2	2	2	2	1		4	2	2	2	2	2
57	wt%	1.286	0.237	1.05	0.108	0.082	31.443	1.179	0.435	0.058	0	0	57.95		91.5493	93.828		60.085	40.311	70.937	56.079	81.41	71.85	101.962	149.88	152	61.979	94.203	79.87		1	1	1	1	1	1	2	2	2	2	2	1		4	2	2	2	2	2
58	wt%	0	3.009	0.511	0.006	0.141	43.848	0.127	0.446	0.029	0	0	49.417		98.1341	97.534		60.085	40.311	70.937	56.079	81.41	71.85	101.962	149.88	152	61.979	94.203	79.87		1	1	1	1	1	1	2	2	2	2	2	1		4	2	2	2	2	2
59	wt%	0	3.074	0.533	0.025	0.01	43.886	0.091	0.511	0.038	0	0	49.899		98.6284	98.067		60.085	40.311	70.937	56.079	81.41	71.85	101.962	149.88	152	61.979	94.203	79.87		1	1	1	1	1	1	2	2	2	2	2	1		4	2	2	2	2	2
60	wt%	0.002	3.389	1.006	0.021	0.016	50.6721	0.221	0.327	0.099	0	0	41.485		99.5082	97.2381		60.085	40.311	70.937	56.079	81.41	71.85	101.962	149.88	152	61.979	94.203	79.87		1	1	1	1	1	1	2	2	2	2	2	1		4	2	2	2	2	2
61	wt%	0	3.389	0.997	0.011	0.046	50.943	0.214	0.275	0	0	0	41.722		99.8742	97.597		60.085	40.311	70.937	56.079	81.41	71.85	101.962	149.88	152	61.979	94.203	79.87		1	1	1	1	1	1	2	2	2	2	2	1		4	2	2	2	2	2
62	wt%	0	3.495	1.023	0.022	0.106	50.6946	0.251	0.306	0.013	0	0	41.74		99.9298	97.6506		60.085	40.311	70.937	56.079	81.41	71.85	101.962	149.88	152	61.979	94.203	79.87		1	1	1	1	1	1	2	2	2	2	2	1		4	2	2	2	2	2
63	wt%	0	3.479	1.051	0.015	0.088	50.6784	0.246	0.29	0.029	0	0	41.887		100.023	97.7634		60.085	40.311	70.937	56.079	81.41	71.85	101.962	149.88	152	61.979	94.203	79.87		1	1	1	1	1	1	2	2	2	2	2	1		4	2	2	2	2	2
64	wt%	0	3.502	1.048	0.013	0.108	50.8368	0.229	0.355	0	0	0	41.994		100.358	98.0858		60.085	40.311	70.937	56.079	81.41	71.85	101.962	149.88	152	61.979	94.203	79.87		1	1	1	1	1	1	2	2	2	2	2	1		4	2	2	2	2	2
65	wt%	0	3.567	1.003	0	0.086	50.6784	0.232	0.227	0.101	0	0	42.061		100.208	97.9554		60.085	40.311	70.937	56.079	81.41	71.85	101.962	149.88	152	61.979	94.203	79.87		1	1	1	1	1	1	2	2	2	2	2	1		4	2	2	2	2	2
66	wt%	0	3.384	1.07	0	0.06	50.9187	0.195	0.252	0	0	0	42.084		100.209	97.9637		60.085	40.311	70.937	56.079	81.41	71.85	101.962	149.88	152	61.979	94.203	79.87		1	1	1	1	1	1	2	2	2	2	2	1		4	2	2	2	2	2
67	wt%	0	4.046	0.544	0.027	0.097	44.449	0.276	0.609	0.083	0	0	49.448		100.45	99.579		60.085	40.311	70.937	56.079	81.41	71.85	101.962	149.88	152	61.979	94.203	79.87		1	1	1	1	1	1	2	2	2	2	2	1		4	2	2	2	2	2
68	wt%	0	3.814	0.462	0.02	0.006	44.4958	0.206	0.639	0.063	0	0	50.241		100.679	99.9468		60.085	40.311	70.937	56.079	81.41	71.85	101.962	149.88	152	61.979	94.203	79.87		1	1	1	1	1	1	2	2	2	2	2	1		4	2	2	2	2	2
69	wt%	0	4.034	0.578	0.007	0.077	45.0564	0.234	0.611	0.11	0	0	50.291		101.85	100.998		60.085	40.311	70.937	56.079	81.41	71.85	101.962	149.88	152	61.979	94.203	79.87		1	1	1	1	1	1	2	2	2	2	2	1		4	2	2	2	2	2
70	wt%	0	4.377	0.351	0	0	49.4403	0.181	0.465	0.193	0	0	42.85		99.9719	97.8573		60.085	40.311	70.937	56.079	81.41	71.85	101.962	149.88	152	61.979	94.203	79.87		1	1	1	1	1	1	2	2	2	2	2	1		4	2	2	2	2	2
71	wt%	0	4.505	0.367	0.013	0.036	49.7562	0.257	0.502	0.114	0	0	42.881		100.61	98.4312		60.085	40.311	70.937	56.079	81.41	71.85	101.962	149.88	152	61.979	94.203	79.87		1	1	1	1	1	1	2	2	2	2	2	1		4	2	2	2	2	2
72	wt%	0	4.621	0.373	0	0	49.4547	0.195	0.494	0.167	0	0	42.923		100.387	98.2277		60.085	40.311	70.937	56.079	81.41	71.85	101.962	149.88	152	61.979	94.203	79.87		1	1	1	1	1	1	2	2	2	2	2	1		4	2	2	2	2	2
73	wt%	0	4.649	0.372	0	0.115	49.7085	0.223	0.474	0.167	0	0	42.935		100.847	98.6435		60.085	40.311	70.937	56.079	81.41	71.85	101.962	149.88	152	61.979	94.203	79.87		1	1	1	1	1	1	2	2	2	2	2	1		4	2	2	2	2	2
74	wt%	0	4.449	0.399	0.006	0.004	49.5357	0.193	0.505	0.165	0	0	43.01		100.397	98.2667		60.085	40.311	70.937	56.079	81.41	71.85	101.962	149.88	152	61.979	94.203	79.87		1	1	1	1	1	1	2	2	2	2	2	1		4	2	2	2	2	2
75	wt%	0	4.46	0.347	0.014	0.202	49.21	0.21	0.462	0.145	0	0	43.13		100.279	98.18		60.085	40.311	70.937	56.079	81.41	71.85	101.962	149.88	152	61.979	94.203	79.87		1	1	1	1	1	1	2	2	2	2	2	1		4	2	2	2	2	2
76	wt%	0	5.458	0.338	0.008	0.132	43.428	0.435	0.596	1.079	0	0	44.651		97.6188	96.125		60.085	40.311	70.937	56.079	81.41	71.85	101.962	149.88	152	61.979	94.203	79.87		1	1	1	1	1	1	2	2	2	2	2	1		4	2	2	2	2	2
77	wt%	0	5.414	0.372	0	0.006	43.398	0.446	0.589	1.035	0	0	44.656		97.3876	95.916		60.085	40.311	70.937	56.079	81.41	71.85	101.962	149.88	152	61.979	94.203	79.87		1	1	1	1	1	1	2	2	2	2	2	1		4	2	2	2	2	2
78	wt%	0	5.533	0.411	0.015	0	43.655	0.442	0.575	1.045	0	0	44.716		97.9156	96.392		60.085	40.311	70.937	56.079	81.41	71.85	101.962	149.88	152	61.979	94.203	79.87		1	1	1	1	1	1	2	2	2	2	2	1		4	2	2	2	2	2
79	wt%	0	5.563	0.378	0.015	0.116	42.962	0.455	0.608	1.158	0	0	44.815		97.5204	96.07		60.085	40.311	70.937	56.079	81.41	71.85	101.962	149.88	152	61.979	94.203	79.87		1	1	1	1	1	1	2	2	2	2	2	1		4	2	2	2	2	2
80	wt%	0.013	5.453	0.416	0	0.126	43.488	0.391	0.503	1.21	0	0	44.896		97.9764	96.496		60.085	40.311	70.937	56.079	81.41	71.85	101.962	149.88	152	61.979	94.203	79.87		1	1	1	1	1	1	2	2	2	2	2	1		4	2	2	2	2	2
81	wt%	0.073	4.994	0.444	0	0.055	44.0675	0.572	0.462	0.262	0	0	46.648		98.8447	97.5775		60.085	40.311	70.937	56.079	81.41	71.85	101.962	149.88	152	61.979	94.203	79.87		1	1	1	1	1	1	2	2	2	2	2	1		4	2	2	2	2	2
82	wt%	0	6.011	0.408	0.006	0.022	44.1791	0.41	0.465	0.187	0	0	46.855		100.006	98.5431		60.085	40.311	70.937	56.079	81.41	71.85	101.962	149.88	152	61.979	94.203	79.87		1	1	1	1	1	1	2	2	2	2	2	1		4	2	2	2	2	2
83	wt%	0	6.602	0.476	0.008	0.153	43.2271	0.232	0.484	0.25	0	0	47.19		100.084	98.6221		60.085	40.311	70.937	56.079	81.41	71.85	101.962	149.88	152	61.979	94.203	79.87		1	1	1	1	1	1	2	2	2	2	2	1		4	2	2	2	2	2
84	wt%	0	4.656	0.418	0	0.022	43.8309	0.614	0.597	0.238	0	0	47.647		99.1007	98.0229		60.085	40.311	70.937	56.079	81.41	71.85	101.962	149.88	152	61.979	94.203	79.87		1	1	1	1	1	1	2	2	2	2	2	1		4	2	2	2	2	2
85	wt%	0.103	4.573	0.412	0.017	0.049	42.851	0.65	0.555	0.314	0	0	47.687		98.1503	97.211		60.085	40.311	70.937	56.079	81.41	71.85	101.962	149.88	152	61.979	94.203	79.87		1	1	1	1	1	1	2	2	2	2	2	1		4	2	2	2	2	2
86	wt%	1.001	0.056	0.395	0.125	0.062	41.841	0	0.324	0.041	0	0	50.099		93.5322	93.944		60.085	40.311	70.937	56.079	81.41	71.85	101.962	149.88	152	61.979	94.203	79.87		1	1	1	1	1	1	2	2	2	2	2	1		4	2	2	2	2	2
87	wt%	0	0.156	0.445	0.01	0.052	45.036	0	0.325	0.006	0	0	52.192		98.0968	98.222		60.085	40.311	70.937	56.079	81.41	71.85	101.962	149.88	152	61.979	94.203	79.87		1	1	1	1	1	1	2	2	2	2	2	1		4	2	2	2	2	2
88	wt%	0	0.146	0.44	0	0.096	45.531	0	0.313	0.025	0	0	52.272		98.7451	98.823		60.085	40.311	70.937	56.079	81.41	71.85	101.962	149.88	152	61.979	94.203	79.87		1	1	1	1	1	1	2	2	2	2	2	1		4	2	2	2	2	2
89	wt%	0	0.149	0.451	0	0.034	45.202	0	0.381	0.041	0	0	52.304		98.4402	98.562		60.085	40.311	70.937	56.079	81.41	71.85	101.962	149.88	152	61.979	94.203	79.87		1	1	1	1	1	1	2	2	2	2	2	1		4	2	2	2	2	2
90	wt%	0	0.121	0.496	0.017	0.056	45.215	0	0.328	0.05	0	0	52.312		98.4779	98.595		60.085	40.311	70.937	56.079	81.41	71.85	101.962	149.88	152	61.979	94.203	79.87		1	1	1	1	1	1	2	2	2	2	2	1		4	2	2	2	2	2
91	wt%	0	0.162	0.467	0.007	0.056	45.534	0	0.441	0.012	0	0	52.362		98.9577	99.041		60.085	40.311	70.937	56.079	81.41	71.85	101.962	149.88	152	61.979	94.203	79.87		1	1	1	1	1	1	2	2	2	2	2	1		4	2	2	2	2	2
92	wt%	0	0.131	0.478	0.02	0.126	45.653	0	0.394	0.019	0	0	52.606		99.3364	99.427		60.085	40.311	70.937	56.079	81.41	71.85	101.962	149.88	152	61.979	94.203	79.87		1	1	1	1	1	1	2	2	2	2	2	1		4	2	2	2	2	2
93	wt%	0	0.133	0.421	0.003	0.052	45.041	0	0.355	0.013	0	0	52.658		98.4966	98.676		60.085	40.311	70.937	56.079	81.41	71.85	101.962	149.88	152	61.979	94.203	79.87		1	1	1	1	1	1	2	2	2	2	2	1		4	2	2	2	2	2
94	wt%	0	0.144	0.514	0	0.036	44.529	0	0.388	0.075	0	0	52.678		98.1364	98.364		60.085	40.311	70.937	56.079	81.41	71.85	101.962	149.88	152	61.979	94.203	79.87		1	1	1	1	1	1	2	2	2	2	2	1		4	2	2	2	2	2
95	wt%	0.049	0.154	0.356	0.074	0	35.238	0.021	0.424	0.034	0	0	57.143		91.773	93.493		60.085	40.311	70.937	56.079	81.41	71.85	101.962	149.88	152	61.979	94.203	79.87		1	1	1	1	1	1	2	2	2	2	2	1		4	2	2	2	2	2
96	wt%	0	0.106	0.824	0.025	0	46.137	0	0.378	0	0	0	50.799		98.4349	98.269		60.085	40.311	70.937	56.079	81.41	71.85	101.962	149.88	152	61.979	94.203	79.87		1	1	1	1	1	1	2	2	2	2	2	1		4	2	2	2	2	2
97	wt%	0	0.063	0.87	0.021	0.044	46.025	0	0.39	0.038	0	0	50.831		98.4327	98.282		60.085	40.311	70.937	56.079	81.41	71.85	101.962	149.88	152	61.979	94.203	79.87		1	1	1	1	1	1	2	2	2	2	2	1		4	2	2	2	2	2
98	wt%	0.017	0.109	0.935	0.01	0.044	46.282	0	0.31	0.029	0	0	50.965		98.8794	98.701		60.085	40.311	70.937	56.079	81.41	71.85	101.962	149.88	152	61.979	94.203	79.87		1	1	1	1	1	1	2	2	2	2	2	1		4	2	2	2	2	2
99	wt%	0	0.076	0.824	0	0.05	45.495	0	0.465	0.016	0	0	51.113		98.0977	98.039		60.085	40.311	70.937	56.079	81.41	71.85	101.962	149.88	152	61.979	94.203	79.87		1	1	1	1	1	1	2	2	2	2	2	1		4	2	2	2	2	2
100	wt%	0	0.076	0.794	0.013	0	45.172	0	0.352	0.061	0	0	51.188		97.6649	97.656		60.085	40.311	70.937	56.079	81.41	71.85	101.962	149.88	152	61.979	94.203	79.87		1	1	1	1	1	1	2	2	2	2	2	1		4	2	2	2	2	2
101	wt%	0.199	0.036	0.873	0.018	0	45.536	0	0.409	0.023	0	0	51.318		98.4236	98.412		60.085	40.311	70.937	56.079	81.41	71.85	101.962	149.88	152	61.979	94.203	79.87		1	1	1	1	1	1	2	2	2	2	2	1		4	2	2	2	2	2
102	wt%	0.518	0.156	0.873	0.071	0	39.29	0	0.353	0.041	0	0	47.465		88.459	88.767		60.085	40.311	70.937	56.079	81.41	71.85	101.962	149.88	152	61.979	94.203	79.87		1	1	1	1	1	1	2	2	2	2	2	1		4	2	2	2	2	2
103	wt%	0.329	0.093	0.82	0.042	0.01	41.272	0	0.393	0	0	0	49.343		92.03	92.302		60.085	40.311	70.937	56.079	81.41	71.85	101.962	149.88	152	61.979	94.203	79.87		1	1	1	1	1	1	2	2	2	2	2	1		4	2	2	2	2	2
104	wt%	0.158	0.041	0.723	0.015	0.012	39.159	0	0.349	0.037	0	0	52.085		91.7965	92.579		60.085	40.311	70.937	56.079	81.41	71.85	101.962	149.88	152	61.979	94.203	79.87		1	1	1	1	1	1	2	2	2	2	2	1		4	2	2	2	2	2
105	wt%	0	0.136	1.276	0.006	0.085	43.554	0	0.415	0.004	0	0	52.561		97.8026	98.037		60.085	40.311	70.937	56.079	81.41	71.85	101.962	149.88	152	61.979	94.203	79.87		1	1	1	1	1	1	2	2	2	2	2	1		4	2	2	2	2	2
106	wt%	0	0.085	1.101	0.006	0.07	44.008	0	0.335	0	0	0	52.656		98.0363	98.261		60.085	40.311	70.937	56.079	81.41	71.85	101.962	149.88	152	61.979	94.203	79.87		1	1	1	1	1	1	2	2	2	2	2	1		4	2	2	2	2	2
107	wt%	0	0.09	1.234	0	0.076	44.737	0	0.322	0	0	0	52.764		99.0841	99.223		60.085	40.311	70.937	56.079	81.41	71.85	101.962	149.88	152	61.979	94.203	79.87		1	1	1	1	1	1	2	2	2	2	2	1		4	2	2	2	2	2
108	wt%	0	0.101	1.149	0.008	0.016	43.565	0	0.333	0.018	0	0	52.813		97.717	98.003		60.085	40.311	70.937	56.079	81.41	71.85	101.962	149.88	152	61.979	94.203	79.87		1	1	1	1	1	1	2	2	2	2	2	1		4	2	2	2	2	2
109	wt%	0	0.124	1.005	0	0.108	43.033	0	0.378	0.012	0	0	52.848		97.1557	97.508		60.085	40.311	70.937	56.079	81.41	71.85	101.962	149.88	152	61.979	94.203	79.87		1	1	1	1	1	1	2	2	2	2	2	1		4	2	2	2	2	2
110	wt%	0.009	0.114	1.005	0.011	0.052	43.609	0	0.36	0.026	0	0	52.886		97.7727	98.072		60.085	40.311	70.937	56.079	81.41	71.85	101.962	149.88	152	61.979	94.203	79.87		1	1	1	1	1	1	2	2	2	2	2	1		4	2	2	2	2	2
111	wt%	0	0.141	1.255	0	0	43.173	0	0.34	0	0	0	52.933		97.5176	97.842		60.085	40.311	70.937	56.079	81.41	71.85	101.962	149.88	152	61.979	94.203	79.87		1	1	1	1	1	1	2	2	2	2	2	1		4	2	2	2	2	2
112	wt%	0	0.128	1.175	0	0.141	43.891	0	0.341	0	0	0	52.955		98.3864	98.631		60.085	40.311	70.937	56.079	81.41	71.85	101.962	149.88	152	61.979	94.203	79.87		1	1	1	1	1	1	2	2	2	2	2	1		4	2	2	2	2	2
113	wt%	0	0.136	1.153	0	0.174	43.744	0	0.38	0.028	0	0	52.98		98.3339	98.595		60.085	40.311	70.937	56.079	81.41	71.85	101.962	149.88	152	61.979	94.203	79.87		1	1	1	1	1	1	2	2	2	2	2	1		4	2	2	2	2	2
114	wt%	0	0.153	1.143	0.001	0.095	42.878	0	0.443	0.026	0	0	53.033		97.4041	97.772		60.085	40.311	70.937	56.079	81.41	71.85	101.962	149.88	152	61.979	94.203	79.87		1	1	1	1	1	1	2	2	2	2	2	1		4	2	2	2	2	2
115	wt%	0	0.174	1.145	0.006	0.134	43.161	0	0.396	0	0	0	53.098		97.78	98.114		60.085	40.311	70.937	56.079	81.41	71.85	101.962	149.88	152	61.979	94.203	79.87		1	1	1	1	1	1	2	2	2	2	2	1		4	2	2	2	2	2
116	wt%	0	0.151	1.281	0.008	0.03	43.164	0	0.362	0.039	0	0	53.143		97.8406	98.178		60.085	40.311	70.937	56.079	81.41	71.85	101.962	149.88	152	61.979	94.203	79.87		1	1	1	1	1	1	2	2	2	2	2	1		4	2	2	2	2	2
117	wt%	0	0.148	1.264	0.015	0.03	42.909	0	0.387	0	0	0	53.211		97.59	97.964		60.085	40.311	70.937	56.079	81.41	71.85	101.962	149.88	152	61.979	94.203	79.87		1	1	1	1	1	1	2	2	2	2	2	1		4	2	2	2	2	2
118	wt%	0	0.338	1.604	0.055	0	45.747	0	0.344	0.013	0	0	48.494		97.0856	96.595		60.085	40.311	70.937	56.079	81.41	71.85	101.962	149.88	152	61.979	94.203	79.87		1	1	1	1	1	1	2	2	2	2	2	1		4	2	2	2	2	2
119	wt%	0	0.257	1.686	0.067	0.05	45.864	0	0.3	0	0	0	48.791		97.4887	97.015		60.085	40.311	70.937	56.079	81.41	71.85	101.962	149.88	152	61.979	94.203	79.87		1	1	1	1	1	1	2	2	2	2	2	1		4	2	2	2	2	2
120	wt%	0	0.385	1.592	0	0	46.191	0	0.337	0	0	0	48.998		97.9927	97.503		60.085	40.311	70.937	56.079	81.41	71.85	101.962	149.88	152	61.979	94.203	79.87		1	1	1	1	1	1	2	2	2	2	2	1		4	2	2	2	2	2
121	wt%	0	0.353	1.695	0.011	0.034	46.178	0	0.288	0	0	0	49.028		98.0824	97.587		60.085	40.311	70.937	56.079	81.41	71.85	101.962	149.88	152	61.979	94.203	79.87		1	1	1	1	1	1	2	2	2	2	2	1		4	2	2	2	2	2
122	wt%	0	0.375	1.494	0	0	46.3	0	0.374	0	0	0	49.125		98.1441	97.668		60.085	40.311	70.937	56.079	81.41	71.85	101.962	149.88	152	61.979	94.203	79.87		1	1	1	1	1	1	2	2	2	2	2	1		4	2	2	2	2	2
123	wt%	0	0.358	1.676	0.029	0.046	45.037	0	0.363	0	0	0	49.72		97.5312	97.229		60.085	40.311	70.937	56.079	81.41	71.85	101.962	149.88	152	61.979	94.203	79.87		1	1	1	1	1	1	2	2	2	2	2	1		4	2	2	2	2	2
124	wt%	0.819	3.001	3.135	0.052	0.059	43.835	0	0.313	0.01	0	0	41.365		94.1749	92.589		60.085	40.311	70.937	56.079	81.41	71.85	101.962	149.88	152	61.979	94.203	79.87		1	1	1	1	1	1	2	2	2	2	2	1		4	2	2	2	2	2
125	wt%	0	2.436	3.107	0.003	0.122	46.523	0	0.277	0	0	0	42.531		96.7598	94.999		60.085	40.311	70.937	56.079	81.41	71.85	101.962	149.88	152	61.979	94.203	79.87		1	1	1	1	1	1	2	2	2	2	2	1		4	2	2	2	2	2
126	wt%	0	2.482	3.271	0	0.245	46.499	0	0.319	0.001	0	0	42.538		97.1516	95.355		60.085	40.311	70.937	56.079	81.41	71.85	101.962	149.88	152	61.979	94.203	79.87		1	1	1	1	1	1	2	2	2	2	2	1		4	2	2	2	2	2
127	wt%	0	2.368	3.071	0	0.215	45.871	0.004	0.288	0.022	0	0	42.573		96.0874	94.412		60.085	40.311	70.937	56.079	81.41	71.85	101.962	149.88	152	61.979	94.203	79.87		1	1	1	1	1	1	2	2	2	2	2	1		4	2	2	2	2	2
128	wt%	0	2.369	3.459	0	0.056	46.619	0	0.334	0.003	0	0	42.611		97.2339	95.451		60.085	40.311	70.937	56.079	81.41	71.85	101.962	149.88	152	61.979	94.203	79.87		1	1	1	1	1	1	2	2	2	2	2	1		4	2	2	2	2	2
129	wt%	0	2.434	3.121	0.003	0.182	45.97	0	0.3	0.045	0	0	42.643		96.3933	94.698		60.085	40.311	70.937	56.079	81.41	71.85	101.962	149.88	152	61.979	94.203	79.87		1	1	1	1	1	1	2	2	2	2	2	1		4	2	2	2	2	2
130	wt%	0	2.515	3.268	0	0.182	46.713	0.019	0.319	0.023	0	0	42.753		97.5909	95.792		60.085	40.311	70.937	56.079	81.41	71.85	101.962	149.88	152	61.979	94.203	79.87		1	1	1	1	1	1	2	2	2	2	2	1		4	2	2	2	2	2
131	wt%	0	1.869	2.674	0	0.139	46.406	0	0.391	0	0	0	43.527		96.4947	95.006		60.085	40.311	70.937	56.079	81.41	71.85	101.962	149.88	152	61.979	94.203	79.87		1	1	1	1	1	1	2	2	2	2	2	1		4	2	2	2	2	2
132	wt%	2.392	0.187	5.417	0.153	0.151	39.95	0.093	0.49	0.06	0	0	42.761		92.1836	91.654		60.085	40.311	70.937	56.079	81.41	71.85	101.962	149.88	152	61.979	94.203	79.87		1	1	1	1	1	1	2	2	2	2	2	1		4	2	2	2	2	2
133	wt%	0.856	0.07	5.512	0.106	0.1	44.5867	0.032	0.499	0.089	0	0	45.143		97.9799	96.9937		60.085	40.311	70.937	56.079	81.41	71.85	101.962	149.88	152	61.979	94.203	79.87		1	1	1	1	1	1	2	2	2	2	2	1		4	2	2	2	2	2
134	wt%	0.501	0.159	5.884	0.087	0.006	39.1464	0.017	0.421	0.076	0	0	45.667		92.3891	91.9644		60.085	40.311	70.937	56.079	81.41	71.85	101.962	149.88	152	61.979	94.203	79.87		1	1	1	1	1	1	2	2	2	2	2	1		4	2	2	2	2	2
135	wt%	0.21	0.04	6.091	0.154	0.034	44.4724	0.055	0.405	0.022	0	0	46.119		98.6238	97.6024		60.085	40.311	70.937	56.079	81.41	71.85	101.962	149.88	152	61.979	94.203	79.87		1	1	1	1	1	1	2	2	2	2	2	1		4	2	2	2	2	2
136	wt%	0.421	0.101	6.089	0.083	0.082	39.2085	0.017	0.446	0.003	0	0	46.201		93.0588	92.6515		60.085	40.311	70.937	56.079	81.41	71.85	101.962	149.88	152	61.979	94.203	79.87		1	1	1	1	1	1	2	2	2	2	2	1		4	2	2	2	2	2
137	wt%	0	0.091	5.182	0.006	0.07	46.0642	0.051	0.478	0.023	0	0	47.09		100.075	99.0552		60.085	40.311	70.937	56.079	81.41	71.85	101.962	149.88	152	61.979	94.203	79.87		1	1	1	1	1	1	2	2	2	2	2	1		4	2	2	2	2	2
138	wt%	0	0.085	4.528	0	0.054	46.4187	0.091	0.522	0.047	0	0	47.148		99.8695	98.8937		60.085	40.311	70.937	56.079	81.41	71.85	101.962	149.88	152	61.979	94.203	79.87		1	1	1	1	1	1	2	2	2	2	2	1		4	2	2	2	2	2
139	wt%	0	0.111	4.519	0.013	0	46.2595	0.077	0.49	0.004	0	0	47.178		99.6072	98.6515		60.085	40.311	70.937	56.079	81.41	71.85	101.962	149.88	152	61.979	94.203	79.87		1	1	1	1	1	1	2	2	2	2	2	1		4	2	2	2	2	2
140	wt%	0.327	0.065	5.178	0.084	0.014	40.6491	0.009	0.441	0.02	0	0	47.43		94.558	94.2171		60.085	40.311	70.937	56.079	81.41	71.85	101.962	149.88	152	61.979	94.203	79.87		1	1	1	1	1	1	2	2	2	2	2	1		4	2	2	2	2	2
141	wt%	0.188	3.857	0.838	0.059	0.041	59.1025	1.3	0.666	2.498	0	0	25.526		98.9318	94.0755		60.085	40.311	70.937	56.079	81.41	71.85	101.962	149.88	152	61.979	94.203	79.87		1	1	1	1	1	1	2	2	2	2	2	1		4	2	2	2	2	2
142	wt%	0	3.731	0.638	0.01	0.106	50.6227	0.17	0.456	0.367	0	0	42.177		100.507	98.2777		60.085	40.311	70.937	56.079	81.41	71.85	101.962	149.88	152	61.979	94.203	79.87		1	1	1	1	1	1	2	2	2	2	2	1		4	2	2	2	2	2
143	wt%	0	3.371	0.55	0.004	0.116	50.1512	0.181	0.533	0.398	0	0	42.199		99.5969	97.5032		60.085	40.311	70.937	56.079	81.41	71.85	101.962	149.88	152	61.979	94.203	79.87		1	1	1	1	1	1	2	2	2	2	2	1		4	2	2	2	2	2
144	wt%	0.725	0.216	0.426	0.116	0.02	41.117	0.108	0.603	0.516	0	0	52.491		95.6734	96.338		60.085	40.311	70.937	56.079	81.41	71.85	101.962	149.88	152	61.979	94.203	79.87		1	1	1	1	1	1	2	2	2	2	2	1		4	2	2	2	2	2
145	wt%	0	2.041	0.3	0.01	0	30.0997	0.106	0.528	0.305	0	0	62.961		93.8438	96.3507		60.085	40.311	70.937	56.079	81.41	71.85	101.962	149.88	152	61.979	94.203	79.87		1	1	1	1	1	1	2	2	2	2	2	1		4	2	2	2	2	2
146	wt%	0	1.401	0.247	0.011	0.073	24.5065	0.072	0.562	0.316	0	0	70.259		93.4657	97.4475		60.085	40.311	70.937	56.079	81.41	71.85	101.962	149.88	152	61.979	94.203	79.87		1	1	1	1	1	1	2	2	2	2	2	1		4	2	2	2	2	2
147	wt%	0	0.811	0.2	0.041	0.021	19.3127	0.11	0.549	0.335	0	0	75.044		91.2648	96.4237		60.085	40.311	70.937	56.079	81.41	71.85	101.962	149.88	152	61.979	94.203	79.87		1	1	1	1	1	1	2	2	2	2	2	1		4	2	2	2	2	2
148	wt%	46.363	7.916	0.196	10.204	0.014	13.549	11.227	0.113	0.003	0	0	4.619		92.1335	94.204		60.085	40.311	70.937	56.079	81.41	71.85	101.962	149.88	152	61.979	94.203	79.87		1	1	1	1	1	1	2	2	2	2	2	1		4	2	2	2	2	2
149	wt%	0	5.143	0.673	0.024	0.044	53.323	0.408	0.368	0.205	0	0	32.78		96.7145	92.968		60.085	40.311	70.937	56.079	81.41	71.85	101.962	149.88	152	61.979	94.203	79.87		1	1	1	1	1	1	2	2	2	2	2	1		4	2	2	2	2	2
150	wt%	0	9.32	0.767	0.015	0.129	47.822	0.414	0.428	0.224	0	0	36.179		98.9385	95.298		60.085	40.311	70.937	56.079	81.41	71.85	101.962	149.88	152	61.979	94.203	79.87		1	1	1	1	1	1	2	2	2	2	2	1		4	2	2	2	2	2
151	wt%	0	8.977	0.613	0.017	0.022	45.392	0.359	0.444	0.205	0	0	38.881		97.9156	94.91		60.085	40.311	70.937	56.079	81.41	71.85	101.962	149.88	152	61.979	94.203	79.87		1	1	1	1	1	1	2	2	2	2	2	1		4	2	2	2	2	2
152	wt%	0	1.615	0.128	0.034	0.054	19.158	0.164	0.618	0.137	0	0	75.112		91.9903	97.02		60.085	40.311	70.937	56.079	81.41	71.85	101.962	149.88	152	61.979	94.203	79.87		1	1	1	1	1	1	2	2	2	2	2	1		4	2	2	2	2	2
153	wt%	0	0.524	0.093	0.06	0	7.31	0.021	0.753	0.086	0	0	88.547		89.4863	97.394		60.085	40.311	70.937	56.079	81.41	71.85	101.962	149.88	152	61.979	94.203	79.87		1	1	1	1	1	1	2	2	2	2	2	1		4	2	2	2	2	2
154	wt%	0	0.637	0.953	0.017	0.03	50.7738	0.268	0.558	0.348	0	0	44.738		99.73	98.3228		60.085	40.311	70.937	56.079	81.41	71.85	101.962	149.88	152	61.979	94.203	79.87		1	1	1	1	1	1	2	2	2	2	2	1		4	2	2	2	2	2
155	wt%	0	3.069	0.602	0.021	0.115	48.6404	0.272	0.611	0.338	0	0	46.111		101.263	99.7794		60.085	40.311	70.937	56.079	81.41	71.85	101.962	149.88	152	61.979	94.203	79.87		1	1	1	1	1	1	2	2	2	2	2	1		4	2	2	2	2	2
156	wt%	0	1.746	0.903	0	0.026	49.335	0.265	0.655	0.349	0	0	46.384		100.957	99.663		60.085	40.311	70.937	56.079	81.41	71.85	101.962	149.88	152	61.979	94.203	79.87		1	1	1	1	1	1	2	2	2	2	2	1		4	2	2	2	2	2
157	wt%	0	5.72	0.495	0.011	0.029	45.24	0.276	0.581	0.38	0	0	46.76		101.036	99.492		60.085	40.311	70.937	56.079	81.41	71.85	101.962	149.88	152	61.979	94.203	79.87		1	1	1	1	1	1	2	2	2	2	2	1		4	2	2	2	2	2
158	wt%	0.045	0.141	0.385	0.018	0.009	23.1684	0.251	0.833	0.44	0	0	70.924		91.7727	96.2144		60.085	40.311	70.937	56.079	81.41	71.85	101.962	149.88	152	61.979	94.203	79.87		1	1	1	1	1	1	2	2	2	2	2	1		4	2	2	2	2	2
159	wt%	0	5.589	0.559	0	0	45.5855	0.248	0.647	0.438	0	0	47.278		101.852	100.345		60.085	40.311	70.937	56.079	81.41	71.85	101.962	149.88	152	61.979	94.203	79.87		1	1	1	1	1	1	2	2	2	2	2	1		4	2	2	2	2	2
160	wt%	0	0.728	0.28	0.014	0.034	19.5224	0.202	0.749	0.212	0	0	75.439		91.9953	97.1804		60.085	40.311	70.937	56.079	81.41	71.85	101.962	149.88	152	61.979	94.203	79.87		1	1	1	1	1	1	2	2	2	2	2	1		4	2	2	2	2	2
161	wt%	0	3.845	0.554	0.003	0	53.958	0.104	0.637	0.057	0	0	35.16		97.6199	94.318		60.085	40.311	70.937	56.079	81.41	71.85	101.962	149.88	152	61.979	94.203	79.87		1	1	1	1	1	1	2	2	2	2	2	1		4	2	2	2	2	2
162	wt%	0	7.12	1.072	0	0.022	44.623	0.068	0.434	0.035	0	0	43.02		98.5828	96.394		60.085	40.311	70.937	56.079	81.41	71.85	101.962	149.88	152	61.979	94.203	79.87		1	1	1	1	1	1	2	2	2	2	2	1		4	2	2	2	2	2
163	wt%	0	1.469	0.332	0.006	0	25.22	0	0.596	0.041	0	0	68.187		92.1705	95.851		60.085	40.311	70.937	56.079	81.41	71.85	101.962	149.88	152	61.979	94.203	79.87		1	1	1	1	1	1	2	2	2	2	2	1		4	2	2	2	2	2
164	wt%	0	0.728	0.067	0	0.009	17.169	0.004	0.734	0.076	0	0	78.844		91.8163	97.631		60.085	40.311	70.937	56.079	81.41	71.85	101.962	149.88	152	61.979	94.203	79.87		1	1	1	1	1	1	2	2	2	2	2	1		4	2	2	2	2	2
165	wt%	0	0.018	0.056	0.008	0	1.23	0	0.641	0	0	0	96.283		88.7693	98.236		60.085	40.311	70.937	56.079	81.41	71.85	101.962	149.88	152	61.979	94.203	79.87		1	1	1	1	1	1	2	2	2	2	2	1		4	2	2	2	2	2
166	wt%	0.017	0.018	0.01	0	0.067	1.181	0	0.664	0.026	0	0	96.582		89.061	98.565		60.085	40.311	70.937	56.079	81.41	71.85	101.962	149.88	152	61.979	94.203	79.87		1	1	1	1	1	1	2	2	2	2	2	1		4	2	2	2	2	2
167	wt%	0	4.31	0.6	0	0	57.63	0.11	0	0.25	0	0	32.22		99.2198	95.12		60.085	40.311	70.937	56.079	81.41	71.85	101.962	149.88	152	61.979	94.203	79.87		1	1	1	1	1	1	2	2	2	2	2	1		4	2	2	2	2	2
168	wt%	0	4.68	0.63	0.02	0	56.05	0.19	0	0.28	0	0	32.86		98.6499	94.71		60.085	40.311	70.937	56.079	81.41	71.85	101.962	149.88	152	61.979	94.203	79.87		1	1	1	1	1	1	2	2	2	2	2	1		4	2	2	2	2	2
169	wt%	0	6.19	0.95	0.02	0	51.68	0.16	0	0.22	0	0	36.33		98.9931	95.55		60.085	40.311	70.937	56.079	81.41	71.85	101.962	149.88	152	61.979	94.203	79.87		1	1	1	1	1	1	2	2	2	2	2	1		4	2	2	2	2	2
170	wt%	0	3.04	0.4	0	0	52.34	0.11	0	0.21	0	0	39.16		97.8059	95.26		60.085	40.311	70.937	56.079	81.41	71.85	101.962	149.88	152	61.979	94.203	79.87		1	1	1	1	1	1	2	2	2	2	2	1		4	2	2	2	2	2
171	wt%	0	2.38	0.36	0.02	0	39.18	0.06	0	0.21	0	0	55.19		96.7522	97.4		60.085	40.311	70.937	56.079	81.41	71.85	101.962	149.88	152	61.979	94.203	79.87		1	1	1	1	1	1	2	2	2	2	2	1		4	2	2	2	2	2
172	wt%	0	1.61	0.27	0	0	28.79	0.03	0	0.15	0	0	66.14		93.9302	96.99		60.085	40.311	70.937	56.079	81.41	71.85	101.962	149.88	152	61.979	94.203	79.87		1	1	1	1	1	1	2	2	2	2	2	1		4	2	2	2	2	2
173	wt%	0	9.121	0.316	0.014	0.052	36.966	0.128	0.68	0.365	0	0	49.183		97.8643	96.825		60.085	40.311	70.937	56.079	81.41	71.85	101.962	149.88	152	61.979	94.203	79.87		1	1	1	1	1	1	2	2	2	2	2	1		4	2	2	2	2	2
174	wt%	0	9.778	0.411	0.006	0.068	36.532	0.14	0.683	0.311	0	0	49.945		98.9301	97.874		60.085	40.311	70.937	56.079	81.41	71.85	101.962	149.88	152	61.979	94.203	79.87		1	1	1	1	1	1	2	2	2	2	2	1		4	2	2	2	2	2
175	wt%	0	9.111	0.403	0.004	0.021	36.464	0.115	0.689	0.361	0	0	50.154		98.2119	97.322		60.085	40.311	70.937	56.079	81.41	71.85	101.962	149.88	152	61.979	94.203	79.87		1	1	1	1	1	1	2	2	2	2	2	1		4	2	2	2	2	2
176	wt%	0	9.804	0.407	0.015	0	35.289	0.081	0.584	0.27	0	0	51.08		98.3341	97.53		60.085	40.311	70.937	56.079	81.41	71.85	101.962	149.88	152	61.979	94.203	79.87		1	1	1	1	1	1	2	2	2	2	2	1		4	2	2	2	2	2
177	wt%	0	7.728	0.363	0	0.044	34.955	0.115	0.824	0.463	0	0	52.824		97.4954	97.316		60.085	40.311	70.937	56.079	81.41	71.85	101.962	149.88	152	61.979	94.203	79.87		1	1	1	1	1	1	2	2	2	2	2	1		4	2	2	2	2	2
178	wt%	0	11.953	0.496	0	0.127	31.934	0.07	0.474	0.199	0	0	53.001		98.9394	98.254		60.085	40.311	70.937	56.079	81.41	71.85	101.962	149.88	152	61.979	94.203	79.87		1	1	1	1	1	1	2	2	2	2	2	1		4	2	2	2	2	2
179	wt%	0	7.33	0.265	0.011	0	34.714	0.104	0.733	0.468	0	0	53.333		96.9673	96.958		60.085	40.311	70.937	56.079	81.41	71.85	101.962	149.88	152	61.979	94.203	79.87		1	1	1	1	1	1	2	2	2	2	2	1		4	2	2	2	2	2
180	wt%	0	7.667	0.274	0	0.021	34.247	0.125	0.63	0.311	0	0	53.795		97.0495	97.07		60.085	40.311	70.937	56.079	81.41	71.85	101.962	149.88	152	61.979	94.203	79.87		1	1	1	1	1	1	2	2	2	2	2	1		4	2	2	2	2	2
181	wt%	0	5.551	0.227	0.017	0.017	21.805	0.062	0.661	0.24	0	0	68.716		93.9826	97.296		60.085	40.311	70.937	56.079	81.41	71.85	101.962	149.88	152	61.979	94.203	79.87		1	1	1	1	1	1	2	2	2	2	2	1		4	2	2	2	2	2
182	wt%	0.019	4.774	0.17	0	0.024	20.622	0.042	0.775	0.279	0	0	71.234		94.0785	97.939		60.085	40.311	70.937	56.079	81.41	71.85	101.962	149.88	152	61.979	94.203	79.87		1	1	1	1	1	1	2	2	2	2	2	1		4	2	2	2	2	2
183	wt%	0.013	4.114	0.269	0.007	0.024	18.97	0.047	0.794	0.251	0	0	72.967		93.1214	97.456		60.085	40.311	70.937	56.079	81.41	71.85	101.962	149.88	152	61.979	94.203	79.87		1	1	1	1	1	1	2	2	2	2	2	1		4	2	2	2	2	2
184	wt%	0.006	4.062	0.244	0	0	18.452	0.057	0.8	0.247	0	0	73.726		93.1106	97.594		60.085	40.311	70.937	56.079	81.41	71.85	101.962	149.88	152	61.979	94.203	79.87		1	1	1	1	1	1	2	2	2	2	2	1		4	2	2	2	2	2
185	wt%	0	2.766	0.119	0.014	0.088	16.378	0.04	0.828	0.244	0	0	77.368		92.5087	97.845		60.085	40.311	70.937	56.079	81.41	71.85	101.962	149.88	152	61.979	94.203	79.87		1	1	1	1	1	1	2	2	2	2	2	1		4	2	2	2	2	2
186	wt%	0	3.571	0.155	0	0.026	15.686	0.04	0.755	0.191	0	0	77.723		92.8537	98.147		60.085	40.311	70.937	56.079	81.41	71.85	101.962	149.88	152	61.979	94.203	79.87		1	1	1	1	1	1	2	2	2	2	2	1		4	2	2	2	2	2
187	wt%	0	3.074	0.173	0.036	0.072	12.939	0.023	0.755	0.126	0	0	80.595		91.8213	97.793		60.085	40.311	70.937	56.079	81.41	71.85	101.962	149.88	152	61.979	94.203	79.87		1	1	1	1	1	1	2	2	2	2	2	1		4	2	2	2	2	2
188	wt%	0	0.033	3.617	0.062	0.071	47.09	0	0.63	0.015	0	0	44.765		97.469	96.283		60.085	40.311	70.937	56.079	81.41	71.85	101.962	149.88	152	61.979	94.203	79.87		1	1	1	1	1	1	2	2	2	2	2	1		4	2	2	2	2	2
189	wt%	0	0.083	3.418	0.05	0.139	43.677	0	0.618	0	0	0	48.92		97.2897	96.905		60.085	40.311	70.937	56.079	81.41	71.85	101.962	149.88	152	61.979	94.203	79.87		1	1	1	1	1	1	2	2	2	2	2	1		4	2	2	2	2	2
190	wt%	0	0.048	4.242	0.035	0.024	43.011	0	0.5	0.054	0	0	48.825		97.1316	96.739		60.085	40.311	70.937	56.079	81.41	71.85	101.962	149.88	152	61.979	94.203	79.87		1	1	1	1	1	1	2	2	2	2	2	1		4	2	2	2	2	2
191	wt%	0	0.051	4.114	0.137	0.08	42.674	0	0.49	0.004	0	0	49.091		96.9758	96.641		60.085	40.311	70.937	56.079	81.41	71.85	101.962	149.88	152	61.979	94.203	79.87		1	1	1	1	1	1	2	2	2	2	2	1		4	2	2	2	2	2
192	wt%	0	0.05	4.419	0.183	0.044	43.107	0	0.499	0.023	0	0	49.237		97.9674	97.562		60.085	40.311	70.937	56.079	81.41	71.85	101.962	149.88	152	61.979	94.203	79.87		1	1	1	1	1	1	2	2	2	2	2	1		4	2	2	2	2	2
193	wt%	0.436	0.093	4.013	0.368	0.098	41.054	0.042	0.552	0	0	0	49.325		96.0863	95.981		60.085	40.311	70.937	56.079	81.41	71.85	101.962	149.88	152	61.979	94.203	79.87		1	1	1	1	1	1	2	2	2	2	2	1		4	2	2	2	2	2
194	wt%	0	0.008	4.26	0.041	0	42.036	0	0.486	0.032	0	0	49.42		96.5006	96.283		60.085	40.311	70.937	56.079	81.41	71.85	101.962	149.88	152	61.979	94.203	79.87		1	1	1	1	1	1	2	2	2	2	2	1		4	2	2	2	2	2
195	wt%	0	0.068	4.425	0.066	0.098	42.032	0	0.527	0.031	0	0	49.468		96.9709	96.715		60.085	40.311	70.937	56.079	81.41	71.85	101.962	149.88	152	61.979	94.203	79.87		1	1	1	1	1	1	2	2	2	2	2	1		4	2	2	2	2	2
196	wt%	0.002	0.058	3.755	0.029	0.154	41.423	0	0.552	0.016	0	0	49.543		95.6355	95.532		60.085	40.311	70.937	56.079	81.41	71.85	101.962	149.88	152	61.979	94.203	79.87		1	1	1	1	1	1	2	2	2	2	2	1		4	2	2	2	2	2
197	wt%	0	0.005	3.972	0.031	0.138	43.506	0	0.505	0.099	0	0	49.618		98.2141	97.874		60.085	40.311	70.937	56.079	81.41	71.85	101.962	149.88	152	61.979	94.203	79.87		1	1	1	1	1	1	2	2	2	2	2	1		4	2	2	2	2	2
198	wt%	0	0	3.899	0.038	0.136	42.905	0	0.612	0.27	0	0	49.97		98.0598	97.83		60.085	40.311	70.937	56.079	81.41	71.85	101.962	149.88	152	61.979	94.203	79.87		1	1	1	1	1	1	2	2	2	2	2	1		4	2	2	2	2	2
199	wt%	0.141	0.101	3.676	0.123	0.098	39.423	0	0.53	0	0	0	50.392		94.2698	94.484		60.085	40.311	70.937	56.079	81.41	71.85	101.962	149.88	152	61.979	94.203	79.87		1	1	1	1	1	1	2	2	2	2	2	1		4	2	2	2	2	2
200	wt%	0.28	0.055	3.173	0.057	0	39.506	0.043	0.597	0.044	0	0	50.564		93.9937	94.319		60.085	40.311	70.937	56.079	81.41	71.85	101.962	149.88	152	61.979	94.203	79.87		1	1	1	1	1	1	2	2	2	2	2	1		4	2	2	2	2	2
201	wt%	0	0.071	0.097	0.032	0	23.306	0	1.078	0.061	0	0	71.873		91.9577	96.518		60.085	40.311	70.937	56.079	81.41	71.85	101.962	149.88	152	61.979	94.203	79.87		1	1	1	1	1	1	2	2	2	2	2	1		4	2	2	2	2	2
202	wt%	1.23	0.232	0.223	0.912	0.055	7.19	1.009	0.958	0.003	0	0	80.405		85.0291	92.217		60.085	40.311	70.937	56.079	81.41	71.85	101.962	149.88	152	61.979	94.203	79.87		1	1	1	1	1	1	2	2	2	2	2	1		4	2	2	2	2	2
203	wt%	1.84	0.4	0.194	1.167	0.04	6.067	1.436	1.008	0.039	0	0	81.202		85.9847	93.393		60.085	40.311	70.937	56.079	81.41	71.85	101.962	149.88	152	61.979	94.203	79.87		1	1	1	1	1	1	2	2	2	2	2	1		4	2	2	2	2	2
204	wt%	0.417	0.269	0.127	0.395	0.046	9.67	1.166	1.102	0.026	0	0	81.289		87.5362	94.507		60.085	40.311	70.937	56.079	81.41	71.85	101.962	149.88	152	61.979	94.203	79.87		1	1	1	1	1	1	2	2	2	2	2	1		4	2	2	2	2	2
205	wt%	0	0.086	0.032	0.035	0.032	12.126	0	0.877	0.053	0	0	83.229		89.534	96.47		60.085	40.311	70.937	56.079	81.41	71.85	101.962	149.88	152	61.979	94.203	79.87		1	1	1	1	1	1	2	2	2	2	2	1		4	2	2	2	2	2
206	wt%	1.393	0.282	0.17	0.991	0.002	4.052	1.183	1.068	0	0	0	83.586		84.8615	92.727		60.085	40.311	70.937	56.079	81.41	71.85	101.962	149.88	152	61.979	94.203	79.87		1	1	1	1	1	1	2	2	2	2	2	1		4	2	2	2	2	2
207	wt%	0.071	0.143	0.028	0.157	0	9.488	0.053	0.973	0.004	0	0	85.544		89.0166	96.461		60.085	40.311	70.937	56.079	81.41	71.85	101.962	149.88	152	61.979	94.203	79.87		1	1	1	1	1	1	2	2	2	2	2	1		4	2	2	2	2	2
208	wt%	0	0.058	0.054	0.157	0.015	9.233	0	0.87	0.022	0	0	86.438		89.282	96.847		60.085	40.311	70.937	56.079	81.41	71.85	101.962	149.88	152	61.979	94.203	79.87		1	1	1	1	1	1	2	2	2	2	2	1		4	2	2	2	2	2
209	wt%	0	0.096	0.041	0.018	0.037	9.632	0	0.892	0.045	0	0	86.693		89.8963	97.454		60.085	40.311	70.937	56.079	81.41	71.85	101.962	149.88	152	61.979	94.203	79.87		1	1	1	1	1	1	2	2	2	2	2	1		4	2	2	2	2	2
210	wt%	0.028	0.068	0.074	0.137	0.063	6.876	0.057	1.053	0.032	0	0	88.715		89.0514	97.103		60.085	40.311	70.937	56.079	81.41	71.85	101.962	149.88	152	61.979	94.203	79.87		1	1	1	1	1	1	2	2	2	2	2	1		4	2	2	2	2	2
211	wt%	0.064	0.09	0.039	0.113	0.031	6.565	0.011	0.955	0.009	0	0	88.979		88.7326	96.856		60.085	40.311	70.937	56.079	81.41	71.85	101.962	149.88	152	61.979	94.203	79.87		1	1	1	1	1	1	2	2	2	2	2	1		4	2	2	2	2	2
212	wt%	0	0.134	0.034	0.015	0	5.776	0	0.93	0.01	0	0	90.678		89.196	97.577		60.085	40.311	70.937	56.079	81.41	71.85	101.962	149.88	152	61.979	94.203	79.87		1	1	1	1	1	1	2	2	2	2	2	1		4	2	2	2	2	2
213	wt%	0.032	0.04	0.067	0.066	0	4.112	0	0.958	0.022	0	0	90.827		87.5316	96.124		60.085	40.311	70.937	56.079	81.41	71.85	101.962	149.88	152	61.979	94.203	79.87		1	1	1	1	1	1	2	2	2	2	2	1		4	2	2	2	2	2
214	wt%	0.086	0.036	0.103	0.102	0	5.096	0.153	1.055	0.092	0	0	91.16		89.3677	97.883		60.085	40.311	70.937	56.079	81.41	71.85	101.962	149.88	152	61.979	94.203	79.87		1	1	1	1	1	1	2	2	2	2	2	1		4	2	2	2	2	2
215	wt%	0	0.098	0.067	0.063	0.031	4.719	0	0.942	0	0	0	91.404		88.7597	97.324		60.085	40.311	70.937	56.079	81.41	71.85	101.962	149.88	152	61.979	94.203	79.87		1	1	1	1	1	1	2	2	2	2	2	1		4	2	2	2	2	2
216	wt%	0	0.025	0.059	0.076	0	4.784	0	1.03	0	0	0	92.263		89.5776	98.237		60.085	40.311	70.937	56.079	81.41	71.85	101.962	149.88	152	61.979	94.203	79.87		1	1	1	1	1	1	2	2	2	2	2	1		4	2	2	2	2	2
217	wt%	0	0.045	0.015	0.056	0	3.893	0	0.895	0.029	0	0	93.205		89.2818	98.138		60.085	40.311	70.937	56.079	81.41	71.85	101.962	149.88	152	61.979	94.203	79.87		1	1	1	1	1	1	2	2	2	2	2	1		4	2	2	2	2	2
218	wt%	0	0.02	0.063	0.039	0	3.363	0	0.927	0.05	0	0	93.594		89.1001	98.056		60.085	40.311	70.937	56.079	81.41	71.85	101.962	149.88	152	61.979	94.203	79.87		1	1	1	1	1	1	2	2	2	2	2	1		4	2	2	2	2	2
219	wt%	23.648	18.769	0.143	0.655	0.031	15.906	17.124	0.263	0.034	0	0	13.955		91.5868	90.528		60.085	40.311	70.937	56.079	81.41	71.85	101.962	149.88	152	61.979	94.203	79.87		1	1	1	1	1	1	2	2	2	2	2	1		4	2	2	2	2	2
220	wt%	7.235	0.821	0.364	1.207	0.041	16.437	2.589	0.714	0.132	0	0	41.554		68.1879	71.094		60.085	40.311	70.937	56.079	81.41	71.85	101.962	149.88	152	61.979	94.203	79.87		1	1	1	1	1	1	2	2	2	2	2	1		4	2	2	2	2	2
221	wt%	7.766	1.411	0.853	1.254	0.015	15.35	3.751	0.544	0.058	0	0	43.355		71.2557	74.357		60.085	40.311	70.937	56.079	81.41	71.85	101.962	149.88	152	61.979	94.203	79.87		1	1	1	1	1	1	2	2	2	2	2	1		4	2	2	2	2	2
222	wt%	1.02	0.239	1.024	0.749	0	18.475	0.727	0.569	0.481	0	0	46.776		67.5735	70.06		60.085	40.311	70.937	56.079	81.41	71.85	101.962	149.88	152	61.979	94.203	79.87		1	1	1	1	1	1	2	2	2	2	2	1		4	2	2	2	2	2
223	wt%	3.628	0.851	0.279	1.507	0	14.802	2.042	0.668	0.025	0	0	47.647		68.2668	71.449		60.085	40.311	70.937	56.079	81.41	71.85	101.962	149.88	152	61.979	94.203	79.87		1	1	1	1	1	1	2	2	2	2	2	1		4	2	2	2	2	2
224	wt%	7.704	0.678	0.32	3.499	0.116	9.946	2.224	0.569	0.079	0	0	50.955		71.7624	76.09		60.085	40.311	70.937	56.079	81.41	71.85	101.962	149.88	152	61.979	94.203	79.87		1	1	1	1	1	1	2	2	2	2	2	1		4	2	2	2	2	2
225	wt%	4.961	0.895	0.55	2.173	0	10.433	1.64	0.597	0.023	0	0	52.528		69.6024	73.8		60.085	40.311	70.937	56.079	81.41	71.85	101.962	149.88	152	61.979	94.203	79.87		1	1	1	1	1	1	2	2	2	2	2	1		4	2	2	2	2	2
226	wt%	7.286	1.001	0.177	0.63	0.027	5.686	3.641	0.705	0.009	0	0	56.14		69.6704	75.302		60.085	40.311	70.937	56.079	81.41	71.85	101.962	149.88	152	61.979	94.203	79.87		1	1	1	1	1	1	2	2	2	2	2	1		4	2	2	2	2	2
227	wt%	0	0.032	3.517	0.102	0.036	43.255	0	0.213	0.003	0	0	48.659		96.1793	95.817		60.085	40.311	70.937	56.079	81.41	71.85	101.962	149.88	152	61.979	94.203	79.87		1	1	1	1	1	1	2	2	2	2	2	1		4	2	2	2	2	2
228	wt%	0	0.056	5.002	0.017	0.014	41.351	0	0.324	0	0	0	49.457		96.4497	96.221		60.085	40.311	70.937	56.079	81.41	71.85	101.962	149.88	152	61.979	94.203	79.87		1	1	1	1	1	1	2	2	2	2	2	1		4	2	2	2	2	2
229	wt%	0	0.005	3.559	0	0.026	44.221	0	0.363	0	0	0	49.495		98.0389	97.669		60.085	40.311	70.937	56.079	81.41	71.85	101.962	149.88	152	61.979	94.203	79.87		1	1	1	1	1	1	2	2	2	2	2	1		4	2	2	2	2	2
230	wt%	0	0.02	3.284	0	0.128	43.913	0	0.285	0	0	0	49.535		97.4788	97.165		60.085	40.311	70.937	56.079	81.41	71.85	101.962	149.88	152	61.979	94.203	79.87		1	1	1	1	1	1	2	2	2	2	2	1		4	2	2	2	2	2
231	wt%	0	0.04	4.803	0.05	0.004	41.338	0	0.33	0.026	0	0	49.542		96.33	96.133		60.085	40.311	70.937	56.079	81.41	71.85	101.962	149.88	152	61.979	94.203	79.87		1	1	1	1	1	1	2	2	2	2	2	1		4	2	2	2	2	2
232	wt%	0	0.012	3.413	0.022	0.092	43.524	0	0.353	0	0	0	49.548		97.2458	96.964		60.085	40.311	70.937	56.079	81.41	71.85	101.962	149.88	152	61.979	94.203	79.87		1	1	1	1	1	1	2	2	2	2	2	1		4	2	2	2	2	2
233	wt%	0	0.002	4.4	0.098	0.05	42.184	0	0.282	0.023	0	0	50.109		97.3408	97.148		60.085	40.311	70.937	56.079	81.41	71.85	101.962	149.88	152	61.979	94.203	79.87		1	1	1	1	1	1	2	2	2	2	2	1		4	2	2	2	2	2
234	wt%	0.019	0.041	0.13	0.029	0	25.355	0.036	0.458	0.02	0	0	69.798		91.7551	95.886		60.085	40.311	70.937	56.079	81.41	71.85	101.962	149.88	152	61.979	94.203	79.87		1	1	1	1	1	1	2	2	2	2	2	1		4	2	2	2	2	2
235	wt%	0.197	0.151	0.232	0.231	0.012	16.282	0.45	0.455	0.023	0	0	72.098		84.8029	90.131		60.085	40.311	70.937	56.079	81.41	71.85	101.962	149.88	152	61.979	94.203	79.87		1	1	1	1	1	1	2	2	2	2	2	1		4	2	2	2	2	2
236	wt%	0	0.058	0.098	0.035	0	6.097	0.036	0.552	0.035	0	0	91.848		90.2918	98.759		60.085	40.311	70.937	56.079	81.41	71.85	101.962	149.88	152	61.979	94.203	79.87		1	1	1	1	1	1	2	2	2	2	2	1		4	2	2	2	2	2
237	wt%	0	0.032	0.052	0.043	0.08	5.341	0.015	0.665	0	0	0	93.466		90.98	99.694		60.085	40.311	70.937	56.079	81.41	71.85	101.962	149.88	152	61.979	94.203	79.87		1	1	1	1	1	1	2	2	2	2	2	1		4	2	2	2	2	2
238	wt%	3.089	2.3	0.4	0.123	0.065	42.045	0.591	0.544	0.037	0	0	39.594		89.6152	88.788		60.085	40.311	70.937	56.079	81.41	71.85	101.962	149.88	152	61.979	94.203	79.87		1	1	1	1	1	1	2	2	2	2	2	1		4	2	2	2	2	2
239	wt%	3.459	2.204	0.345	0.698	0.215	40.518	0.822	0.603	0.016	0	0	41.268		90.6608	90.148		60.085	40.311	70.937	56.079	81.41	71.85	101.962	149.88	152	61.979	94.203	79.87		1	1	1	1	1	1	2	2	2	2	2	1		4	2	2	2	2	2
240	wt%	1.816	2.336	0.434	0.164	0.065	40.888	0.918	0.603	0	0	0	41.737		89.6316	88.961		60.085	40.311	70.937	56.079	81.41	71.85	101.962	149.88	152	61.979	94.203	79.87		1	1	1	1	1	1	2	2	2	2	2	1		4	2	2	2	2	2
241	wt%	3.692	2.732	0.439	0.081	0.083	39.886	1.326	0.583	0.023	0	0	43.727		92.7525	92.572		60.085	40.311	70.937	56.079	81.41	71.85	101.962	149.88	152	61.979	94.203	79.87		1	1	1	1	1	1	2	2	2	2	2	1		4	2	2	2	2	2
242	wt%	0.116	2.328	0.334	0.022	0.02	42.51	0.059	0.505	0.057	0	0	47.133		93.584	93.084		60.085	40.311	70.937	56.079	81.41	71.85	101.962	149.88	152	61.979	94.203	79.87		1	1	1	1	1	1	2	2	2	2	2	1		4	2	2	2	2	2
243	wt%	0.171	2.422	0.404	0.024	0.03	44.274	0.098	0.55	0.029	0	0	47.43		96.1186	95.432		60.085	40.311	70.937	56.079	81.41	71.85	101.962	149.88	152	61.979	94.203	79.87		1	1	1	1	1	1	2	2	2	2	2	1		4	2	2	2	2	2
244	wt%	0	2.573	0.429	0.028	0.131	45.631	0.06	0.556	0.004	0	0	47.513		97.8198	96.925		60.085	40.311	70.937	56.079	81.41	71.85	101.962	149.88	152	61.979	94.203	79.87		1	1	1	1	1	1	2	2	2	2	2	1		4	2	2	2	2	2
245	wt%	0	2.537	0.413	0.02	0.085	45.365	0.042	0.621	0.031	0	0	47.819		97.7531	96.933		60.085	40.311	70.937	56.079	81.41	71.85	101.962	149.88	152	61.979	94.203	79.87		1	1	1	1	1	1	2	2	2	2	2	1		4	2	2	2	2	2
246	wt%	0	2.524	0.377	0.05	0.059	46.012	0.087	0.547	0	0	0	47.877		98.4143	97.533		60.085	40.311	70.937	56.079	81.41	71.85	101.962	149.88	152	61.979	94.203	79.87		1	1	1	1	1	1	2	2	2	2	2	1		4	2	2	2	2	2
247	wt%	0.145	2.114	0.376	0.021	0	41.832	0.045	0.538	0.019	0	0	47.885		93.2811	92.975		60.085	40.311	70.937	56.079	81.41	71.85	101.962	149.88	152	61.979	94.203	79.87		1	1	1	1	1	1	2	2	2	2	2	1		4	2	2	2	2	2
248	wt%	0	2.524	0.471	0.003	0.072	45.774	0.079	0.597	0.01	0	0	47.954		98.3363	97.484		60.085	40.311	70.937	56.079	81.41	71.85	101.962	149.88	152	61.979	94.203	79.87		1	1	1	1	1	1	2	2	2	2	2	1		4	2	2	2	2	2
249	wt%	0.103	2.245	0.373	0.049	0.032	42.26	0.07	0.559	0	0	0	48.781		94.7744	94.472		60.085	40.311	70.937	56.079	81.41	71.85	101.962	149.88	152	61.979	94.203	79.87		1	1	1	1	1	1	2	2	2	2	2	1		4	2	2	2	2	2
250	wt%	0.158	2.008	0.36	0.056	0.042	41.748	0.072	0.58	0.022	0	0	49.63		94.7831	94.676		60.085	40.311	70.937	56.079	81.41	71.85	101.962	149.88	152	61.979	94.203	79.87		1	1	1	1	1	1	2	2	2	2	2	1		4	2	2	2	2	2
251	wt%	0.019	1.255	0.514	0.004	0.418	68.3742	3.152	1.252	1.174	0	0	19.222		101.399	95.3842		60.085	40.311	70.937	56.079	81.41	71.85	101.962	149.88	152	61.979	94.203	79.87		1	1	1	1	1	1	2	2	2	2	2	1		4	2	2	2	2	2
252	wt%	0.017	1.511	0.443	0.027	0.346	66.6205	2.989	1.181	1.055	0	0	22.403		102.135	96.5925		60.085	40.311	70.937	56.079	81.41	71.85	101.962	149.88	152	61.979	94.203	79.87		1	1	1	1	1	1	2	2	2	2	2	1		4	2	2	2	2	2
253	wt%	0.116	4.608	0.489	0.057	0	42.267	0.079	0.511	0.076	0	0	48.322		97.3508	96.525		60.085	40.311	70.937	56.079	81.41	71.85	101.962	149.88	152	61.979	94.203	79.87		1	1	1	1	1	1	2	2	2	2	2	1		4	2	2	2	2	2
254	wt%	0.197	4.263	0.537	0.085	0.077	43.3774	0.121	0.486	0.101	0	0	48.661		98.7585	97.9054		60.085	40.311	70.937	56.079	81.41	71.85	101.962	149.88	152	61.979	94.203	79.87		1	1	1	1	1	1	2	2	2	2	2	1		4	2	2	2	2	2
255	wt%	0	3.661	0.558	0.025	0.061	44.5948	0.134	0.5	0.113	0	0	50.344		100.71	99.9908		60.085	40.311	70.937	56.079	81.41	71.85	101.962	149.88	152	61.979	94.203	79.87		1	1	1	1	1	1	2	2	2	2	2	1		4	2	2	2	2	2
256	wt%	0	3.593	0.608	0.018	0.083	44.0873	0.113	0.577	0.149	0	0	50.446		100.321	99.6743		60.085	40.311	70.937	56.079	81.41	71.85	101.962	149.88	152	61.979	94.203	79.87		1	1	1	1	1	1	2	2	2	2	2	1		4	2	2	2	2	2
257	wt%	0	3.542	0.616	0.029	0.006	44.5885	0.142	0.511	0.146	0	0	51.235		101.424	100.816		60.085	40.311	70.937	56.079	81.41	71.85	101.962	149.88	152	61.979	94.203	79.87		1	1	1	1	1	1	2	2	2	2	2	1		4	2	2	2	2	2
258	wt%	0	3.736	0.55	0.007	0	44.737	0.094	0.559	0.13	0	0	51.335		101.79	101.148		60.085	40.311	70.937	56.079	81.41	71.85	101.962	149.88	152	61.979	94.203	79.87		1	1	1	1	1	1	2	2	2	2	2	1		4	2	2	2	2	2
259	wt%	0	0.075	0.714	0	0	76.5994	0	0.471	0.064	0	0	19.115		103.727	97.0384		60.085	40.311	70.937	56.079	81.41	71.85	101.962	149.88	152	61.979	94.203	79.87		1	1	1	1	1	1	2	2	2	2	2	1		4	2	2	2	2	2
260	wt%	0	0.076	0.705	0	0	75.4099	0	0.437	0.069	0	0	20.942		104.013	97.6389		60.085	40.311	70.937	56.079	81.41	71.85	101.962	149.88	152	61.979	94.203	79.87		1	1	1	1	1	1	2	2	2	2	2	1		4	2	2	2	2	2
261	wt%	0	0.078	1.122	0.003	0.039	65.6478	0	0.447	0.037	0	0	30.878		102.601	98.2518		60.085	40.311	70.937	56.079	81.41	71.85	101.962	149.88	152	61.979	94.203	79.87		1	1	1	1	1	1	2	2	2	2	2	1		4	2	2	2	2	2
262	wt%	0	0.119	1.888	0.01	0	45.0267	0	0.349	0	0	0	51.915		99.359	99.3077		60.085	40.311	70.937	56.079	81.41	71.85	101.962	149.88	152	61.979	94.203	79.87		1	1	1	1	1	1	2	2	2	2	2	1		4	2	2	2	2	2
263	wt%	0	0.129	1.661	0	0.02	45.491	0	0.321	0	0	0	52.174		99.85	99.796		60.085	40.311	70.937	56.079	81.41	71.85	101.962	149.88	152	61.979	94.203	79.87		1	1	1	1	1	1	2	2	2	2	2	1		4	2	2	2	2	2
264	wt%	0	0.166	1.858	0.006	0.095	44.7595	0	0.419	0.01	0	0	52.202		99.5231	99.5155		60.085	40.311	70.937	56.079	81.41	71.85	101.962	149.88	152	61.979	94.203	79.87		1	1	1	1	1	1	2	2	2	2	2	1		4	2	2	2	2	2
265	wt%	0	0.148	1.853	0.031	0	45.2184	0	0.39	0	0	0	52.237		99.9226	99.8774		60.085	40.311	70.937	56.079	81.41	71.85	101.962	149.88	152	61.979	94.203	79.87		1	1	1	1	1	1	2	2	2	2	2	1		4	2	2	2	2	2
266	wt%	0	0.113	1.732	0	0	45.204	0	0.374	0.012	0	0	52.402		99.8392	99.837		60.085	40.311	70.937	56.079	81.41	71.85	101.962	149.88	152	61.979	94.203	79.87		1	1	1	1	1	1	2	2	2	2	2	1		4	2	2	2	2	2
267	wt%	0	0.048	0.318	0.004	0	78.776	0	0.39	0.118	0	0	10.262		97.6813	89.916		60.085	40.311	70.937	56.079	81.41	71.85	101.962	149.88	152	61.979	94.203	79.87		1	1	1	1	1	1	2	2	2	2	2	1		4	2	2	2	2	2
268	wt%	0	0.035	0.362	0.02	0.004	78.083	0	0.385	0.08	0	0	10.619		97.2457	89.588		60.085	40.311	70.937	56.079	81.41	71.85	101.962	149.88	152	61.979	94.203	79.87		1	1	1	1	1	1	2	2	2	2	2	1		4	2	2	2	2	2
269	wt%	0	0.055	0.538	0.007	0	75.914	0	0.358	0.102	0	0	13.069		97.2368	90.043		60.085	40.311	70.937	56.079	81.41	71.85	101.962	149.88	152	61.979	94.203	79.87		1	1	1	1	1	1	2	2	2	2	2	1		4	2	2	2	2	2
270	wt%	0	0.048	0.85	0.024	0.019	73.163	0	0.347	0.077	0	0	16.34		97.4678	90.868		60.085	40.311	70.937	56.079	81.41	71.85	101.962	149.88	152	61.979	94.203	79.87		1	1	1	1	1	1	2	2	2	2	2	1		4	2	2	2	2	2
271	wt%	0.877	0.23	3.423	0.073	0.046	39.158	0	0.327	0.023	0	0	49.6		93.4796	93.757		60.085	40.311	70.937	56.079	81.41	71.85	101.962	149.88	152	61.979	94.203	79.87		1	1	1	1	1	1	2	2	2	2	2	1		4	2	2	2	2	2
272	wt%	0	0.28	3.495	0	0.004	43.227	0	0.338	0.003	0	0	50.181		97.7641	97.528		60.085	40.311	70.937	56.079	81.41	71.85	101.962	149.88	152	61.979	94.203	79.87		1	1	1	1	1	1	2	2	2	2	2	1		4	2	2	2	2	2
273	wt%	0	0.325	3.57	0.015	0.016	42.826	0	0.343	0.026	0	0	50.531		97.8293	97.652		60.085	40.311	70.937	56.079	81.41	71.85	101.962	149.88	152	61.979	94.203	79.87		1	1	1	1	1	1	2	2	2	2	2	1		4	2	2	2	2	2
274	wt%	0	0.348	3.584	0.035	0.21	42.791	0	0.316	0.006	0	0	50.536		98.0269	97.826		60.085	40.311	70.937	56.079	81.41	71.85	101.962	149.88	152	61.979	94.203	79.87		1	1	1	1	1	1	2	2	2	2	2	1		4	2	2	2	2	2
275	wt%	0	0.322	3.662	0	0.056	43.111	0	0.284	0.012	0	0	50.566		98.23	98.013		60.085	40.311	70.937	56.079	81.41	71.85	101.962	149.88	152	61.979	94.203	79.87		1	1	1	1	1	1	2	2	2	2	2	1		4	2	2	2	2	2
276	wt%	0	0.244	3.694	0	0	42.387	0	0.333	0.069	0	0	51.293		98.0667	98.02		60.085	40.311	70.937	56.079	81.41	71.85	101.962	149.88	152	61.979	94.203	79.87		1	1	1	1	1	1	2	2	2	2	2	1		4	2	2	2	2	2
277	wt%	0	0.008	0.435	0	0.007	76.669	0	0.662	0.513	0	0	12.709		98.2954	91.003		60.085	40.311	70.937	56.079	81.41	71.85	101.962	149.88	152	61.979	94.203	79.87		1	1	1	1	1	1	2	2	2	2	2	1		4	2	2	2	2	2
278	wt%	0	0.051	0.493	0.011	0.139	76.302	0	0.563	0.441	0	0	12.725		98.0046	90.725		60.085	40.311	70.937	56.079	81.41	71.85	101.962	149.88	152	61.979	94.203	79.87		1	1	1	1	1	1	2	2	2	2	2	1		4	2	2	2	2	2
279	wt%	0	0.005	0.22	0.025	0	69.135	0	0.687	0.471	0	0	19.579		95.8702	90.122		60.085	40.311	70.937	56.079	81.41	71.85	101.962	149.88	152	61.979	94.203	79.87		1	1	1	1	1	1	2	2	2	2	2	1		4	2	2	2	2	2
280	wt%	0	0	0.061	0.031	0	59.609	0	0.633	0.478	0	0	32.001		96.2454	92.813		60.085	40.311	70.937	56.079	81.41	71.85	101.962	149.88	152	61.979	94.203	79.87		1	1	1	1	1	1	2	2	2	2	2	1		4	2	2	2	2	2
281	wt%	0.03	0.051	0.152	0.059	0.054	29.984	0	0.674	0.288	0	0	65.388		93.5158	96.68		60.085	40.311	70.937	56.079	81.41	71.85	101.962	149.88	152	61.979	94.203	79.87		1	1	1	1	1	1	2	2	2	2	2	1		4	2	2	2	2	2
282	wt%	0	0.063	0.183	0.034	0.036	20.136	0	0.596	0.108	0	0	72.534		88.7237	93.69		60.085	40.311	70.937	56.079	81.41	71.85	101.962	149.88	152	61.979	94.203	79.87		1	1	1	1	1	1	2	2	2	2	2	1		4	2	2	2	2	2
283	wt%	0	0.015	0.152	0.006	0	18.161	0	0.691	0.14	0	0	74.65		88.3977	93.815		60.085	40.311	70.937	56.079	81.41	71.85	101.962	149.88	152	61.979	94.203	79.87		1	1	1	1	1	1	2	2	2	2	2	1		4	2	2	2	2	2
284	wt%	0.019	0.017	0.187	0.02	0	18.204	0	0.6	0.016	0	0	76.255		89.749	95.318		60.085	40.311	70.937	56.079	81.41	71.85	101.962	149.88	152	61.979	94.203	79.87		1	1	1	1	1	1	2	2	2	2	2	1		4	2	2	2	2	2
285	wt%	0	0.036	0.087	0.013	0	5.365	0	0.865	0.089	0	0	93.434		91.1735	99.889		60.085	40.311	70.937	56.079	81.41	71.85	101.962	149.88	152	61.979	94.203	79.87		1	1	1	1	1	1	2	2	2	2	2	1		4	2	2	2	2	2
286	wt%	0.086	0	0.909	0.109	0	45.548	0.002	0.402	0.076	0	0	45.547		93.2931	92.679		60.085	40.311	70.937	56.079	81.41	71.85	101.962	149.88	152	61.979	94.203	79.87		1	1	1	1	1	1	2	2	2	2	2	1		4	2	2	2	2	2
287	wt%	0.047	0.109	6.215	0.056	0.106	43.806	0	0.341	0.076	0	0	46.291		98.0195	97.047		60.085	40.311	70.937	56.079	81.41	71.85	101.962	149.88	152	61.979	94.203	79.87		1	1	1	1	1	1	2	2	2	2	2	1		4	2	2	2	2	2
288	wt%	0	0.479	3.5	0.105	0.03	45.418	0	0.34	0.047	0	0	47.627		98.3378	97.546		60.085	40.311	70.937	56.079	81.41	71.85	101.962	149.88	152	61.979	94.203	79.87		1	1	1	1	1	1	2	2	2	2	2	1		4	2	2	2	2	2
289	wt%	0	0.471	4.186	0	0.082	44.11	0	0.406	0.054	0	0	48.269		98.2262	97.578		60.085	40.311	70.937	56.079	81.41	71.85	101.962	149.88	152	61.979	94.203	79.87		1	1	1	1	1	1	2	2	2	2	2	1		4	2	2	2	2	2
290	wt%	0	0.066	0.35	0.011	0	41.866	0	0.468	0.114	0	0	48.988		91.6724	91.863		60.085	40.311	70.937	56.079	81.41	71.85	101.962	149.88	152	61.979	94.203	79.87		1	1	1	1	1	1	2	2	2	2	2	1		4	2	2	2	2	2
291	wt%	0.015	0.335	2.198	0.05	0.032	38.349	0	0.456	0.158	0	0	51.277		92.3282	92.87		60.085	40.311	70.937	56.079	81.41	71.85	101.962	149.88	152	61.979	94.203	79.87		1	1	1	1	1	1	2	2	2	2	2	1		4	2	2	2	2	2
292	wt%	0	0.002	0.018	0.007	0.026	90.3342	0	0.154	0.026	0	0	5.813		105.833	96.3802		60.085	40.311	70.937	56.079	81.41	71.85	101.962	149.88	152	61.979	94.203	79.87		1	1	1	1	1	1	2	2	2	2	2	1		4	2	2	2	2	2
293	wt%	0.026	0.003	0.256	0.011	0.056	85.8702	0	0.134	0.066	0	0	7.901		103.099	94.3232		60.085	40.311	70.937	56.079	81.41	71.85	101.962	149.88	152	61.979	94.203	79.87		1	1	1	1	1	1	2	2	2	2	2	1		4	2	2	2	2	2
294	wt%	0	0.028	0.417	0.013	0.026	80.1969	0	0.387	0.058	0	0	12.989		101.777	94.1149		60.085	40.311	70.937	56.079	81.41	71.85	101.962	149.88	152	61.979	94.203	79.87		1	1	1	1	1	1	2	2	2	2	2	1		4	2	2	2	2	2
295	wt%	0	0.033	0.567	0	0	79.0559	0	0.428	0.123	0	0	13.656		101.345	93.8629		60.085	40.311	70.937	56.079	81.41	71.85	101.962	149.88	152	61.979	94.203	79.87		1	1	1	1	1	1	2	2	2	2	2	1		4	2	2	2	2	2
296	wt%	0	0.012	0.657	0	0.07	79.6174	0	0.488	0.101	0	0	13.693		102.192	94.6384		60.085	40.311	70.937	56.079	81.41	71.85	101.962	149.88	152	61.979	94.203	79.87		1	1	1	1	1	1	2	2	2	2	2	1		4	2	2	2	2	2
297	wt%	3.314	0.166	0.341	0.123	0.07	44.0225	0.023	0.446	0.102	0	0	40.111		89.2554	88.7185		60.085	40.311	70.937	56.079	81.41	71.85	101.962	149.88	152	61.979	94.203	79.87		1	1	1	1	1	1	2	2	2	2	2	1		4	2	2	2	2	2
298	wt%	0.036	0.09	6.639	0.085	0.014	42.7475	0	0.333	0.01	0	0	47.327		98.0736	97.2815		60.085	40.311	70.937	56.079	81.41	71.85	101.962	149.88	152	61.979	94.203	79.87		1	1	1	1	1	1	2	2	2	2	2	1		4	2	2	2	2	2
299	wt%	0	0.038	6.362	0.014	0.096	44.8099	0	0.369	0.019	0	0	48.458		101.035	100.166		60.085	40.311	70.937	56.079	81.41	71.85	101.962	149.88	152	61.979	94.203	79.87		1	1	1	1	1	1	2	2	2	2	2	1		4	2	2	2	2	2
300	wt%	0	0.002	0.307	0.034	0	37.0202	0	0.427	0.019	0	0	57.595		93.8021	95.4042		60.085	40.311	70.937	56.079	81.41	71.85	101.962	149.88	152	61.979	94.203	79.87		1	1	1	1	1	1	2	2	2	2	2	1		4	2	2	2	2	2
301	wt%	0	0.027	0.137	0.015	0.006	22.8238	0	0.555	0.042	0	0	74.811		93.5035	98.4168		60.085	40.311	70.937	56.079	81.41	71.85	101.962	149.88	152	61.979	94.203	79.87		1	1	1	1	1	1	2	2	2	2	2	1		4	2	2	2	2	2
302	wt%	0	0.023	0.027	0	0.047	12.4543	0	0.641	0.01	0	0	86.248		92.2327	99.4503		60.085	40.311	70.937	56.079	81.41	71.85	101.962	149.88	152	61.979	94.203	79.87		1	1	1	1	1	1	2	2	2	2	2	1		4	2	2	2	2	2
303	wt%	0	0	0	0.011	0	5.838	0	0.636	0	0	0	93.482		91.282	99.967		60.085	40.311	70.937	56.079	81.41	71.85	101.962	149.88	152	61.979	94.203	79.87		1	1	1	1	1	1	2	2	2	2	2	1		4	2	2	2	2	2
304	wt%	0.073	0	0.015	0.028	0	4.374	0	0.674	0.006	0	0	93.874		90.1518	99.044		60.085	40.311	70.937	56.079	81.41	71.85	101.962	149.88	152	61.979	94.203	79.87		1	1	1	1	1	1	2	2	2	2	2	1		4	2	2	2	2	2
305	wt%	0	0.053	0.445	0	0.026	79.16	0	0.39	0.053	0	0	11.504		99.3321	91.631		60.085	40.311	70.937	56.079	81.41	71.85	101.962	149.88	152	61.979	94.203	79.87		1	1	1	1	1	1	2	2	2	2	2	1		4	2	2	2	2	2
306	wt%	0	0.033	0.3	0.004	0	80.312	0	0.121	0.007	0	0	12.825		101.277	93.602		60.085	40.311	70.937	56.079	81.41	71.85	101.962	149.88	152	61.979	94.203	79.87		1	1	1	1	1	1	2	2	2	2	2	1		4	2	2	2	2	2
307	wt%	0	0	0.362	0.011	0.073	77.858	0	0.4	0.076	0	0	13.778		99.8739	92.558		60.085	40.311	70.937	56.079	81.41	71.85	101.962	149.88	152	61.979	94.203	79.87		1	1	1	1	1	1	2	2	2	2	2	1		4	2	2	2	2	2
308	wt%	0	0.144	1.881	0	0	66.771	0	0.096	0.041	0	0	23.119		97.395	92.052		60.085	40.311	70.937	56.079	81.41	71.85	101.962	149.88	152	61.979	94.203	79.87		1	1	1	1	1	1	2	2	2	2	2	1		4	2	2	2	2	2
309	wt%	0	0.166	1.85	0.015	0	66.194	0	0.2	0.06	0	0	23.843		97.5377	92.328		60.085	40.311	70.937	56.079	81.41	71.85	101.962	149.88	152	61.979	94.203	79.87		1	1	1	1	1	1	2	2	2	2	2	1		4	2	2	2	2	2
310	wt%	0	0.098	1.62	0.001	0	49.212	0	0.291	0.023	0	0	46.688		98.9352	97.933		60.085	40.311	70.937	56.079	81.41	71.85	101.962	149.88	152	61.979	94.203	79.87		1	1	1	1	1	1	2	2	2	2	2	1		4	2	2	2	2	2
311	wt%	0	0.118	1.504	0.008	0.016	49.511	0	0.281	0.016	0	0	47.063		99.5084	98.517		60.085	40.311	70.937	56.079	81.41	71.85	101.962	149.88	152	61.979	94.203	79.87		1	1	1	1	1	1	2	2	2	2	2	1		4	2	2	2	2	2
312	wt%	0	0.544	8.576	0.008	0.056	38.841	0	0.252	0.031	0	0	48.788		97.6141	97.096		60.085	40.311	70.937	56.079	81.41	71.85	101.962	149.88	152	61.979	94.203	79.87		1	1	1	1	1	1	2	2	2	2	2	1		4	2	2	2	2	2
313	wt%	0	0.06	0.142	0	0.067	32.635	0	0.365	0.004	0	0	59.82		90.7766	93.093		60.085	40.311	70.937	56.079	81.41	71.85	101.962	149.88	152	61.979	94.203	79.87		1	1	1	1	1	1	2	2	2	2	2	1		4	2	2	2	2	2
314	wt%	9.173	0.516	0.511	0.211	0.082	10.162	1.358	0.431	0	0	0	69.653		85.2498	92.097		60.085	40.311	70.937	56.079	81.41	71.85	101.962	149.88	152	61.979	94.203	79.87		1	1	1	1	1	1	2	2	2	2	2	1		4	2	2	2	2	2
315	wt%	0	0.085	0.043	0.017	0	78.456	0.127	0.677	0.104	0	0	12.408		99.4107	91.917		60.085	40.311	70.937	56.079	81.41	71.85	101.962	149.88	152	61.979	94.203	79.87		1	1	1	1	1	1	2	2	2	2	2	1		4	2	2	2	2	2
316	wt%	0	0.116	0.028	0	0	77.42	0.102	0.727	0.094	0	0	12.889		98.7087	91.376		60.085	40.311	70.937	56.079	81.41	71.85	101.962	149.88	152	61.979	94.203	79.87		1	1	1	1	1	1	2	2	2	2	2	1		4	2	2	2	2	2
317	wt%	0	0.695	0.369	0	0.077	50.937	0.008	0.388	0.026	0	0	45.137		98.9704	97.637		60.085	40.311	70.937	56.079	81.41	71.85	101.962	149.88	152	61.979	94.203	79.87		1	1	1	1	1	1	2	2	2	2	2	1		4	2	2	2	2	2
318	wt%	0	0.721	0.329	0	0.026	49.658	0	0.415	0.056	0	0	46.668		98.9072	97.873		60.085	40.311	70.937	56.079	81.41	71.85	101.962	149.88	152	61.979	94.203	79.87		1	1	1	1	1	1	2	2	2	2	2	1		4	2	2	2	2	2
319	wt%	0	0.744	0.341	0.007	0	48.656	0	0.402	0.013	0	0	47.348		98.3705	97.511		60.085	40.311	70.937	56.079	81.41	71.85	101.962	149.88	152	61.979	94.203	79.87		1	1	1	1	1	1	2	2	2	2	2	1		4	2	2	2	2	2
320	wt%	0	0.033	0.208	0.004	0	80.081	0	0.59	0.094	0	0	9.019		98.0479	90.029		60.085	40.311	70.937	56.079	81.41	71.85	101.962	149.88	152	61.979	94.203	79.87		1	1	1	1	1	1	2	2	2	2	2	1		4	2	2	2	2	2
321	wt%	0	0.032	0.139	0.011	0	79.785	0	0.614	0.05	0	0	9.805		98.3366	90.436		60.085	40.311	70.937	56.079	81.41	71.85	101.962	149.88	152	61.979	94.203	79.87		1	1	1	1	1	1	2	2	2	2	2	1		4	2	2	2	2	2
322	wt%	0	0.008	0.189	0.011	0.112	79.142	0	0.584	0.057	0	0	9.981		97.9075	90.084		60.085	40.311	70.937	56.079	81.41	71.85	101.962	149.88	152	61.979	94.203	79.87		1	1	1	1	1	1	2	2	2	2	2	1		4	2	2	2	2	2
323	wt%	0	0.051	0.191	0.001	0	78.47	0	0.505	0.079	0	0	11.843		98.6993	91.14		60.085	40.311	70.937	56.079	81.41	71.85	101.962	149.88	152	61.979	94.203	79.87		1	1	1	1	1	1	2	2	2	2	2	1		4	2	2	2	2	2
324	wt%	0	0.035	0.817	0	0	73.873	0	0.493	0.003	0	0	17.496		99.2686	92.717		60.085	40.311	70.937	56.079	81.41	71.85	101.962	149.88	152	61.979	94.203	79.87		1	1	1	1	1	1	2	2	2	2	2	1		4	2	2	2	2	2
325	wt%	0.002	0.234	0.165	0.022	0	32.799	0	0.45	0.056	0	0	57.45		89.1498	91.178		60.085	40.311	70.937	56.079	81.41	71.85	101.962	149.88	152	61.979	94.203	79.87		1	1	1	1	1	1	2	2	2	2	2	1		4	2	2	2	2	2
326	wt%	0	0.211	0.424	0.017	0.063	31.862	0	0.427	0.023	0	0	58.549		89.3643	91.576		60.085	40.311	70.937	56.079	81.41	71.85	101.962	149.88	152	61.979	94.203	79.87		1	1	1	1	1	1	2	2	2	2	2	1		4	2	2	2	2	2
327	wt%	0	0.337	0.181	0.027	0.015	21.058	0	0.519	0.01	0	0	71.878		89.2775	94.025		60.085	40.311	70.937	56.079	81.41	71.85	101.962	149.88	152	61.979	94.203	79.87		1	1	1	1	1	1	2	2	2	2	2	1		4	2	2	2	2	2
328	wt%	0	0.26	0.156	0	0	12.385	0	0.624	0.006	0	0	82.727		89.3411	96.158		60.085	40.311	70.937	56.079	81.41	71.85	101.962	149.88	152	61.979	94.203	79.87		1	1	1	1	1	1	2	2	2	2	2	1		4	2	2	2	2	2
329	wt%	0	0.179	1.648	0.021	0	51.634	0	0.391	0.054	0	0	42.625		98.2508	96.552		60.085	40.311	70.937	56.079	81.41	71.85	101.962	149.88	152	61.979	94.203	79.87		1	1	1	1	1	1	2	2	2	2	2	1		4	2	2	2	2	2
330	wt%	0	0.166	2.857	0.004	0.024	47.83	0	0.315	0.029	0	0	45.612		97.9486	96.837		60.085	40.311	70.937	56.079	81.41	71.85	101.962	149.88	152	61.979	94.203	79.87		1	1	1	1	1	1	2	2	2	2	2	1		4	2	2	2	2	2
331	wt%	0	0.219	1.862	0	0.02	48.592	0	0.434	0.031	0	0	46.775		98.9107	97.933		60.085	40.311	70.937	56.079	81.41	71.85	101.962	149.88	152	61.979	94.203	79.87		1	1	1	1	1	1	2	2	2	2	2	1		4	2	2	2	2	2
332	wt%	0	0.227	1.906	0.003	0.08	46.771	0	0.362	0.023	0	0	47.614		97.6906	96.986		60.085	40.311	70.937	56.079	81.41	71.85	101.962	149.88	152	61.979	94.203	79.87		1	1	1	1	1	1	2	2	2	2	2	1		4	2	2	2	2	2
333	wt%	0	0.186	1.941	0.011	0.096	46.574	0	0.403	0	0	0	48.599		98.3929	97.81		60.085	40.311	70.937	56.079	81.41	71.85	101.962	149.88	152	61.979	94.203	79.87		1	1	1	1	1	1	2	2	2	2	2	1		4	2	2	2	2	2
334	wt%	0	0.191	1.834	0.004	0.092	45.948	0	0.374	0.028	0	0	48.783		97.7366	97.254		60.085	40.311	70.937	56.079	81.41	71.85	101.962	149.88	152	61.979	94.203	79.87		1	1	1	1	1	1	2	2	2	2	2	1		4	2	2	2	2	2
335	wt%	0	0.167	1.972	0	0.138	45.701	0	0.41	0	0	0	49.375		98.1738	97.763		60.085	40.311	70.937	56.079	81.41	71.85	101.962	149.88	152	61.979	94.203	79.87		1	1	1	1	1	1	2	2	2	2	2	1		4	2	2	2	2	2
336	wt%	0	0.174	2.217	0	0	45.518	0	0.306	0.041	0	0	49.822		98.4392	98.078		60.085	40.311	70.937	56.079	81.41	71.85	101.962	149.88	152	61.979	94.203	79.87		1	1	1	1	1	1	2	2	2	2	2	1		4	2	2	2	2	2
337	wt%	30.673	0	0.124	28.5	0.007	1.259	0.852	0.39	0	0	0	37.67		95.8497	99.475		60.085	40.311	70.937	56.079	81.41	71.85	101.962	149.88	152	61.979	94.203	79.87		1	1	1	1	1	1	2	2	2	2	2	1		4	2	2	2	2	2
338	wt%	0	0.058	2.004	0.252	0	44.423	0	0.58	0	0	0	51.287		98.6864	98.604		60.085	40.311	70.937	56.079	81.41	71.85	101.962	149.88	152	61.979	94.203	79.87		1	1	1	1	1	1	2	2	2	2	2	1		4	2	2	2	2	2
339	wt%	0	0.013	0.151	0.05	0	81.865	0	0.527	0.061	0	0	8.335		99.2834	91.002		60.085	40.311	70.937	56.079	81.41	71.85	101.962	149.88	152	61.979	94.203	79.87		1	1	1	1	1	1	2	2	2	2	2	1		4	2	2	2	2	2
340	wt%	30.729	0	0.083	28.584	0	0.628	1.013	0.309	0	0	0	38.031		95.6448	99.377		60.085	40.311	70.937	56.079	81.41	71.85	101.962	149.88	152	61.979	94.203	79.87		1	1	1	1	1	1	2	2	2	2	2	1		4	2	2	2	2	2
341	wt%	30.761	0	0.145	28.822	0	0.992	0.93	0.26	0.037	0	0	38.291		96.5568	100.238		60.085	40.311	70.937	56.079	81.41	71.85	101.962	149.88	152	61.979	94.203	79.87		1	1	1	1	1	1	2	2	2	2	2	1		4	2	2	2	2	2
342	wt%	0	0.202	3.396	0.172	0	43.944	0	0.431	0.004	0	0	50.479		98.9115	98.628		60.085	40.311	70.937	56.079	81.41	71.85	101.962	149.88	152	61.979	94.203	79.87		1	1	1	1	1	1	2	2	2	2	2	1		4	2	2	2	2	2
343	wt%	30.113	0.002	0.067	28.413		0.98	0.831		0.228	0	0	38.773		95.6958	99.407		60.085	40.311	70.937	56.079	81.41	71.85	101.962	149.88	152	61.979	94.203	79.87		1	1	1	1	1	1	2	2	2	2	2	1		4	2	2	2	2	2
344	wt%	30.258	0	0.035	28.076		0.939	0.215		0.466	0	0	39.328		95.4747	99.317		60.085	40.311	70.937	56.079	81.41	71.85	101.962	149.88	152	61.979	94.203	79.87		1	1	1	1	1	1	2	2	2	2	2	1		4	2	2	2	2	2
345	wt%	30.38	0	0	28.501		0.278	0.62		0.158	0	0	39.712		95.7353	99.649		60.085	40.311	70.937	56.079	81.41	71.85	101.962	149.88	152	61.979	94.203	79.87		1	1	1	1	1	1	2	2	2	2	2	1		4	2	2	2	2	2
346	wt%	30.463	0	0	28.747		0.413	0.544		0.132	0	0	39.914		96.3181	100.213		60.085	40.311	70.937	56.079	81.41	71.85	101.962	149.88	152	61.979	94.203	79.87		1	1	1	1	1	1	2	2	2	2	2	1		4	2	2	2	2	2
347	wt%	30.149	0.002	0.005	28.535		0.542	0.563		0.227	0	0	39.934		96.0869	99.957		60.085	40.311	70.937	56.079	81.41	71.85	101.962	149.88	152	61.979	94.203	79.87		1	1	1	1	1	1	2	2	2	2	2	1		4	2	2	2	2	2
348	wt%	30.194	0.025	0	28.602		0.262	0.455		0.102	0	0	40.062		95.7956	99.702		60.085	40.311	70.937	56.079	81.41	71.85	101.962	149.88	152	61.979	94.203	79.87		1	1	1	1	1	1	2	2	2	2	2	1		4	2	2	2	2	2
349	wt%	30.275	0	0.037	28.742		0.26	0.763		0.091	0	0	40.099		96.365	100.267		60.085	40.311	70.937	56.079	81.41	71.85	101.962	149.88	152	61.979	94.203	79.87		1	1	1	1	1	1	2	2	2	2	2	1		4	2	2	2	2	2
350	wt%	0.351	0.169	8.681	0.802		34.885	0.004		0.045	0	0	53.101		97.6848	98.038		60.085	40.311	70.937	56.079	81.41	71.85	101.962	149.88	152	61.979	94.203	79.87		1	1	1	1	1	1	2	2	2	2	2	1		4	2	2	2	2	2
351	wt%	0.053	0.194	11.186	1.069		34.4	0		0.02	0	0	53.338		100.193	100.26		60.085	40.311	70.937	56.079	81.41	71.85	101.962	149.88	152	61.979	94.203	79.87		1	1	1	1	1	1	2	2	2	2	2	1		4	2	2	2	2	2
352	wt%	0.015	0.201	10.13	0.743		35.715	0		0.039	0	0	53.543		100.286	100.386		60.085	40.311	70.937	56.079	81.41	71.85	101.962	149.88	152	61.979	94.203	79.87		1	1	1	1	1	1	2	2	2	2	2	1		4	2	2	2	2	2
353	wt%	0.047	0.187	5.711	0.758		30.879	0		0.051	0	0	58.439		94.4448	96.072		60.085	40.311	70.937	56.079	81.41	71.85	101.962	149.88	152	61.979	94.203	79.87		1	1	1	1	1	1	2	2	2	2	2	1		4	2	2	2	2	2
354	wt%	0.081	0	0	0.003	0	88.8756	0	0.031	0.022	0	0	0.345		99.178	89.3576		60.085	40.311	70.937	56.079	81.41	71.85	101.962	149.88	152	61.979	94.203	79.87		1	1	1	1	1	1	2	2	2	2	2	1		4	2	2	2	2	2
355	wt%	0	0	0.057	0.008	0	88.8882	0	0.035	0.061	0	0	0.135		99.0448	89.1842		60.085	40.311	70.937	56.079	81.41	71.85	101.962	149.88	152	61.979	94.203	79.87		1	1	1	1	1	1	2	2	2	2	2	1		4	2	2	2	2	2
356	wt%	0	0.012	0.046	0.014	0.011	88.8918	0	0.063	0.004	0	0	0.225		99.1219	89.2668		60.085	40.311	70.937	56.079	81.41	71.85	101.962	149.88	152	61.979	94.203	79.87		1	1	1	1	1	1	2	2	2	2	2	1		4	2	2	2	2	2
357	wt%	0.101	0.023	0	0.008	0	89.2652	0	0.068	0.006	0	0	0.237		99.5853	89.7082		60.085	40.311	70.937	56.079	81.41	71.85	101.962	149.88	152	61.979	94.203	79.87		1	1	1	1	1	1	2	2	2	2	2	1		4	2	2	2	2	2
358	wt%	0	0.032	0.025	0.059	0	89.4119	0	0.034	0.06	0	0	0.259		99.7973	89.8809		60.085	40.311	70.937	56.079	81.41	71.85	101.962	149.88	152	61.979	94.203	79.87		1	1	1	1	1	1	2	2	2	2	2	1		4	2	2	2	2	2
359	wt%	0	0.003	0.067	0	0	91.2286	0	0.022	0.05	0	0	0.33		101.802	91.7006		60.085	40.311	70.937	56.079	81.41	71.85	101.962	149.88	152	61.979	94.203	79.87		1	1	1	1	1	1	2	2	2	2	2	1		4	2	2	2	2	2
360	wt%	0	0	0.031	0	0.054	87.739	0	0.2	0.001	0	0	0.167		97.9231	88.192		60.085	40.311	70.937	56.079	81.41	71.85	101.962	149.88	152	61.979	94.203	79.87		1	1	1	1	1	1	2	2	2	2	2	1		4	2	2	2	2	2
361	wt%	0	0	0	0	0.035	88.339	0.006	0.188	0.039	0	0	0.173		98.5718	88.78		60.085	40.311	70.937	56.079	81.41	71.85	101.962	149.88	152	61.979	94.203	79.87		1	1	1	1	1	1	2	2	2	2	2	1		4	2	2	2	2	2
362	wt%	0	0.008	0.028	0.017	0	88.534	0	0.179	0.038	0	0	0.42		99.0165	89.224		60.085	40.311	70.937	56.079	81.41	71.85	101.962	149.88	152	61.979	94.203	79.87		1	1	1	1	1	1	2	2	2	2	2	1		4	2	2	2	2	2
363	wt%	0	0	0.072	0	0	89.053	0	0.193	0.019	0	0	0.422		99.6098	89.759		60.085	40.311	70.937	56.079	81.41	71.85	101.962	149.88	152	61.979	94.203	79.87		1	1	1	1	1	1	2	2	2	2	2	1		4	2	2	2	2	2
364	wt%	0.019	0	0.039	0.024	0.035	90.027	0	0.197	0.028	0	0	0.345		100.681	90.714		60.085	40.311	70.937	56.079	81.41	71.85	101.962	149.88	152	61.979	94.203	79.87		1	1	1	1	1	1	2	2	2	2	2	1		4	2	2	2	2	2
365	wt%	0	0.088	0.223	0.018	0.071	80.697	0.059	0.281	0.124	0	0	8.288		98.0308	89.849		60.085	40.311	70.937	56.079	81.41	71.85	101.962	149.88	152	61.979	94.203	79.87		1	1	1	1	1	1	2	2	2	2	2	1		4	2	2	2	2	2
366	wt%	0	0.063	0.159	0.006	0.049	80.97	0.028	0.327	0.088	0	0	8.534		98.3955	90.224		60.085	40.311	70.937	56.079	81.41	71.85	101.962	149.88	152	61.979	94.203	79.87		1	1	1	1	1	1	2	2	2	2	2	1		4	2	2	2	2	2
367	wt%	0	0.093	0.275	0.003	0.067	80.687	0.045	0.328	0.095	0	0	8.607		98.3531	90.2		60.085	40.311	70.937	56.079	81.41	71.85	101.962	149.88	152	61.979	94.203	79.87		1	1	1	1	1	1	2	2	2	2	2	1		4	2	2	2	2	2
368	wt%	0	0.086	0.172	0.011	0.037	81.001	0.066	0.293	0.056	0	0	8.78		98.6579	90.502		60.085	40.311	70.937	56.079	81.41	71.85	101.962	149.88	152	61.979	94.203	79.87		1	1	1	1	1	1	2	2	2	2	2	1		4	2	2	2	2	2
369	wt%	0	0.088	0.201	0	0.045	80.382	0.06	0.275	0.051	0	0	9.151		98.3061	90.253		60.085	40.311	70.937	56.079	81.41	71.85	101.962	149.88	152	61.979	94.203	79.87		1	1	1	1	1	1	2	2	2	2	2	1		4	2	2	2	2	2
370	wt%	0.009	0.04	0.089	0	0.007	67.015	0.04	0.287	0.063	0	0	24.053		96.6573	91.603		60.085	40.311	70.937	56.079	81.41	71.85	101.962	149.88	152	61.979	94.203	79.87		1	1	1	1	1	1	2	2	2	2	2	1		4	2	2	2	2	2
371	wt%	0	0.012	0.11	0.01	0.004	66.362	0.021	0.365	0.089	0	0	24.902		96.7712	91.875		60.085	40.311	70.937	56.079	81.41	71.85	101.962	149.88	152	61.979	94.203	79.87		1	1	1	1	1	1	2	2	2	2	2	1		4	2	2	2	2	2
372	wt%	0	0.035	0.083	0	0	62.339	0.028	0.43	0.054	0	0	28.096		95.1954	91.065		60.085	40.311	70.937	56.079	81.41	71.85	101.962	149.88	152	61.979	94.203	79.87		1	1	1	1	1	1	2	2	2	2	2	1		4	2	2	2	2	2
373	wt%	0	0.005	0.068	0	0	60.868	0.019	0.441	0.088	0	0	29.284		94.6139	90.773		60.085	40.311	70.937	56.079	81.41	71.85	101.962	149.88	152	61.979	94.203	79.87		1	1	1	1	1	1	2	2	2	2	2	1		4	2	2	2	2	2
374	wt%	0	0.007	0.048	0.007	0.007	59.092	0.038	0.394	0.11	0	0	30.957		94.1365	90.66		60.085	40.311	70.937	56.079	81.41	71.85	101.962	149.88	152	61.979	94.203	79.87		1	1	1	1	1	1	2	2	2	2	2	1		4	2	2	2	2	2
375	wt%	0	0	0.08	0.008	0.014	55.154	0.036	0.388	0.082	0	0	35.163		93.5474	90.925		60.085	40.311	70.937	56.079	81.41	71.85	101.962	149.88	152	61.979	94.203	79.87		1	1	1	1	1	1	2	2	2	2	2	1		4	2	2	2	2	2
376	wt%	0	0	0.067	0	0.031	53.604	0.042	0.477	0.07	0	0	37.13		93.674	91.421		60.085	40.311	70.937	56.079	81.41	71.85	101.962	149.88	152	61.979	94.203	79.87		1	1	1	1	1	1	2	2	2	2	2	1		4	2	2	2	2	2
377	wt%	0	0.017	0.044	0.008	0	50.907	0.013	0.45	0.057	0	0	42.486		95.3997	93.982		60.085	40.311	70.937	56.079	81.41	71.85	101.962	149.88	152	61.979	94.203	79.87		1	1	1	1	1	1	2	2	2	2	2	1		4	2	2	2	2	2
378	wt%	0	0.012	0.017	0.013	0	46.279	0.023	0.471	0.079	0	0	45.725		93.1963	92.619		60.085	40.311	70.937	56.079	81.41	71.85	101.962	149.88	152	61.979	94.203	79.87		1	1	1	1	1	1	2	2	2	2	2	1		4	2	2	2	2	2
379	wt%	0	0.051	2.765	0.025	0.072	42.441	0	0.405	0.048	0	0	49.9		95.7668	95.707		60.085	40.311	70.937	56.079	81.41	71.85	101.962	149.88	152	61.979	94.203	79.87		1	1	1	1	1	1	2	2	2	2	2	1		4	2	2	2	2	2
380	wt%	0.034	0.07	2.879	0.003	0	43.093	0	0.371	0.025	0	0	49.874		96.4856	96.349		60.085	40.311	70.937	56.079	81.41	71.85	101.962	149.88	152	61.979	94.203	79.87		1	1	1	1	1	1	2	2	2	2	2	1		4	2	2	2	2	2
381	wt%	5.637	0.958	0.058	0.113	0	73.787	0.843	0.765	0.076	0	0	0.861		90.6663	83.098		60.085	40.311	70.937	56.079	81.41	71.85	101.962	149.88	152	61.979	94.203	79.87		1	1	1	1	1	1	2	2	2	2	2	1		4	2	2	2	2	2
382	wt%	0.203	0.046	0.019	0.039	0	79.319	0.023	0.739	0.083	0	0	0.967		90.1357	81.438		60.085	40.311	70.937	56.079	81.41	71.85	101.962	149.88	152	61.979	94.203	79.87		1	1	1	1	1	1	2	2	2	2	2	1		4	2	2	2	2	2
383	wt%	0.156	0.017	0.022	0.059	0.004	79.625	0.038	0.78	0.107	0	0	0.939		90.4855	81.747		60.085	40.311	70.937	56.079	81.41	71.85	101.962	149.88	152	61.979	94.203	79.87		1	1	1	1	1	1	2	2	2	2	2	1		4	2	2	2	2	2
384	wt%	0.156	0.035	0.035	0.071	0.065	79.727	0.074	0.719	0.051	0	0	1.218		90.8857	82.151		60.085	40.311	70.937	56.079	81.41	71.85	101.962	149.88	152	61.979	94.203	79.87		1	1	1	1	1	1	2	2	2	2	2	1		4	2	2	2	2	2
385	wt%	0.235	0.055	0	0.035	0	80.37	0.079	0.703	0.025	0	0	0.807		91.1342	82.309		60.085	40.311	70.937	56.079	81.41	71.85	101.962	149.88	152	61.979	94.203	79.87		1	1	1	1	1	1	2	2	2	2	2	1		4	2	2	2	2	2
386	wt%	0.308	0.056	0.063	0.07	0.026	80.841	0.085	0.781	0.025	0	0	0.806		91.9437	83.061		60.085	40.311	70.937	56.079	81.41	71.85	101.962	149.88	152	61.979	94.203	79.87		1	1	1	1	1	1	2	2	2	2	2	1		4	2	2	2	2	2
387	wt%	0.116	0.02	0.054	0.055	0	80.935	0.072	0.75	0.075	0	0	0.824		91.805	82.901		60.085	40.311	70.937	56.079	81.41	71.85	101.962	149.88	152	61.979	94.203	79.87		1	1	1	1	1	1	2	2	2	2	2	1		4	2	2	2	2	2
388	wt%	0.212	0.018	0.017	0.046	0.08	80.983	0.094	0.693	0.063	0	0	0.977		92.0663	83.183		60.085	40.311	70.937	56.079	81.41	71.85	101.962	149.88	152	61.979	94.203	79.87		1	1	1	1	1	1	2	2	2	2	2	1		4	2	2	2	2	2
389	wt%	0.214	0.007	0	0.064	0.039	81.182	0.042	0.689	0.038	0	0	1.116		92.2767	83.391		60.085	40.311	70.937	56.079	81.41	71.85	101.962	149.88	152	61.979	94.203	79.87		1	1	1	1	1	1	2	2	2	2	2	1		4	2	2	2	2	2
390	wt%	0.143	0.036	0.008	0.035	0	81.603	0.051	0.725	0.077	0	0	0.834		92.4807	83.512		60.085	40.311	70.937	56.079	81.41	71.85	101.962	149.88	152	61.979	94.203	79.87		1	1	1	1	1	1	2	2	2	2	2	1		4	2	2	2	2	2
391	wt%	0.201	0.036	0.081	0.06	0	81.834	0.053	0.744	0.082	0	0	0.906		92.9882	83.997		60.085	40.311	70.937	56.079	81.41	71.85	101.962	149.88	152	61.979	94.203	79.87		1	1	1	1	1	1	2	2	2	2	2	1		4	2	2	2	2	2
392	wt%	0.334	0.244	0.044	0.094	0	86.444	0.304	0.356	0.121	0	0	1.49		98.8998	89.431		60.085	40.311	70.937	56.079	81.41	71.85	101.962	149.88	152	61.979	94.203	79.87		1	1	1	1	1	1	2	2	2	2	2	1		4	2	2	2	2	2
393	wt%	0.004	0.008	0.066	0.042	0.138	87.043	0.013	0.305	0.025	0	0	1.223		98.4346	88.867		60.085	40.311	70.937	56.079	81.41	71.85	101.962	149.88	152	61.979	94.203	79.87		1	1	1	1	1	1	2	2	2	2	2	1		4	2	2	2	2	2
394	wt%	0.019	0.008	0.036	0.042	0.05	87.391	0.032	0.305	0.053	0	0	1.201		98.7315	89.137		60.085	40.311	70.937	56.079	81.41	71.85	101.962	149.88	152	61.979	94.203	79.87		1	1	1	1	1	1	2	2	2	2	2	1		4	2	2	2	2	2
395	wt%	0.024	0	0.065	0.039	0	87.563	0.025	0.337	0.06	0	0	0.994		98.7369	89.107		60.085	40.311	70.937	56.079	81.41	71.85	101.962	149.88	152	61.979	94.203	79.87		1	1	1	1	1	1	2	2	2	2	2	1		4	2	2	2	2	2
396	wt%	96.024	0.156	0	0.039	0.004	1.715	0.812	0.025	0	0	0	0.36		86.5805	99.135		60.085	40.311	70.937	56.079	81.41	71.85	101.962	149.88	152	61.979	94.203	79.87		1	1	1	1	1	1	2	2	2	2	2	1		4	2	2	2	2	2
397	wt%	0.319	0.025	0.218	54.494	0.668	2.329	0	0.035	0.05	0	0	0.108		66.2962	58.246		60.085	40.311	70.937	56.079	81.41	71.85	101.962	149.88	152	61.979	94.203	79.87		1	1	1	1	1	1	2	2	2	2	2	1		4	2	2	2	2	2
398	wt%	0.21	0	0.096	55.491	0.719	1.962	0	0.043	0.004	0	0	0.067		66.7482	58.592		60.085	40.311	70.937	56.079	81.41	71.85	101.962	149.88	152	61.979	94.203	79.87		1	1	1	1	1	1	2	2	2	2	2	1		4	2	2	2	2	2
399	wt%	6.655	0.492	0.031	0.147	0.007	78.0472	2.09	0.293	0.039	0	0	0.198		95.8818	87.9992		60.085	40.311	70.937	56.079	81.41	71.85	101.962	149.88	152	61.979	94.203	79.87		1	1	1	1	1	1	2	2	2	2	2	1		4	2	2	2	2	2
400	wt%	0.511	0.002	0	0.066	0.169	86.1573	0.076	0.272	0.038	0	0	0.565		97.3218	87.8563		60.085	40.311	70.937	56.079	81.41	71.85	101.962	149.88	152	61.979	94.203	79.87		1	1	1	1	1	1	2	2	2	2	2	1		4	2	2	2	2	2
401	wt%	0.381	0.05	0	0.028	0	88.9665	0.04	0.287	0.034	0	0	0.112		99.7259	89.8985		60.085	40.311	70.937	56.079	81.41	71.85	101.962	149.88	152	61.979	94.203	79.87		1	1	1	1	1	1	2	2	2	2	2	1		4	2	2	2	2	2
402	wt%	0.285	0.033	0.031	0	0.011	89.016	0	0.262	0.023	0	0	0.178		99.6752	89.839		60.085	40.311	70.937	56.079	81.41	71.85	101.962	149.88	152	61.979	94.203	79.87		1	1	1	1	1	1	2	2	2	2	2	1		4	2	2	2	2	2
403	wt%	0.8	0	0.022	0	0	89.1869	0.004	0.299	0.067	0	0	0.332		100.474	90.7109		60.085	40.311	70.937	56.079	81.41	71.85	101.962	149.88	152	61.979	94.203	79.87		1	1	1	1	1	1	2	2	2	2	2	1		4	2	2	2	2	2
404	wt%	0.12	0.01	0.054	0.022	0	89.6728	0	0.285	0.072	0	0	0.242		100.403	90.4778		60.085	40.311	70.937	56.079	81.41	71.85	101.962	149.88	152	61.979	94.203	79.87		1	1	1	1	1	1	2	2	2	2	2	1		4	2	2	2	2	2
405	wt%	0	0.005	0	0	0	94.0738	0	0.284	0.026	0	0	0.232		105.041	94.6208		60.085	40.311	70.937	56.079	81.41	71.85	101.962	149.88	152	61.979	94.203	79.87		1	1	1	1	1	1	2	2	2	2	2	1		4	2	2	2	2	2
406	wt%	0	1.193	0.622	0.004		58.487	0.518		0.002	0	0	30.429		95.0151	91.255		60.085	40.311	70.937	56.079	81.41	71.85	101.962	149.88	152	61.979	94.203	79.87		1	1	1	1	1	1	2	2	2	2	2	1		4	2	2	2	2	2
407	wt%	0.018	1.761	1.121	0.008		53.304	0.437		0.028	0	0	35.736		95.2345	92.413		60.085	40.311	70.937	56.079	81.41	71.85	101.962	149.88	152	61.979	94.203	79.87		1	1	1	1	1	1	2	2	2	2	2	1		4	2	2	2	2	2
408	wt%	0	0.567	0.289	0.022		29.922	0.223		0.038	0	0	63.663		91.8361	94.724		60.085	40.311	70.937	56.079	81.41	71.85	101.962	149.88	152	61.979	94.203	79.87		1	1	1	1	1	1	2	2	2	2	2	1		4	2	2	2	2	2
409	wt%	0	1.046	0.693	0.01		28.453	0.23		0	0	0	64.722		92.1358	95.154		60.085	40.311	70.937	56.079	81.41	71.85	101.962	149.88	152	61.979	94.203	79.87		1	1	1	1	1	1	2	2	2	2	2	1		4	2	2	2	2	2
410	wt%	0.008	0.626	0.5	0.004		23.348	0.177		0.002	0	0	69.551		90.0422	94.216		60.085	40.311	70.937	56.079	81.41	71.85	101.962	149.88	152	61.979	94.203	79.87		1	1	1	1	1	1	2	2	2	2	2	1		4	2	2	2	2	2
411	wt%	50.054	3.081	0.124	0.297		11.119	21.987		0	0	0	1.669		83.4204	88.331		60.085	40.311	70.937	56.079	81.41	71.85	101.962	149.88	152	61.979	94.203	79.87		1	1	1	1	1	1	2	2	2	2	2	1		4	2	2	2	2	2
412	wt%	0	5.25	1.01	0.002		63.404	0.529		0.03	0	0	21.612		97.8693	91.837		60.085	40.311	70.937	56.079	81.41	71.85	101.962	149.88	152	61.979	94.203	79.87		1	1	1	1	1	1	2	2	2	2	2	1		4	2	2	2	2	2
413	wt%	0.001	3.82	0.726	0.011		56.259	0.501		0.055	0	0	30.375		95.7985	91.748		60.085	40.311	70.937	56.079	81.41	71.85	101.962	149.88	152	61.979	94.203	79.87		1	1	1	1	1	1	2	2	2	2	2	1		4	2	2	2	2	2
414	wt%	0	2.956	0.527	0.01		56.13	0.433		0	0	0	32.297		96.0039	92.353		60.085	40.311	70.937	56.079	81.41	71.85	101.962	149.88	152	61.979	94.203	79.87		1	1	1	1	1	1	2	2	2	2	2	1		4	2	2	2	2	2
415	wt%	0	1.26	0.275	0.022		31.349	0.191		0.001	0	0	62.227		92.8744	95.325		60.085	40.311	70.937	56.079	81.41	71.85	101.962	149.88	152	61.979	94.203	79.87		1	1	1	1	1	1	2	2	2	2	2	1		4	2	2	2	2	2
416	wt%	0	0.96	0.2	0.03		23.927	0.171		0.016	0	0	70.069		91.2489	95.373		60.085	40.311	70.937	56.079	81.41	71.85	101.962	149.88	152	61.979	94.203	79.87		1	1	1	1	1	1	2	2	2	2	2	1		4	2	2	2	2	2
417	wt%	0.006	1.345	0.305	0.005		24.064	0.169		0	0	0	70.374		92.2123	96.268		60.085	40.311	70.937	56.079	81.41	71.85	101.962	149.88	152	61.979	94.203	79.87		1	1	1	1	1	1	2	2	2	2	2	1		4	2	2	2	2	2
418	wt%	0.002	0.9	0.232	0.007		16.523	0.086		0.053	0	0	78.69		90.6744	96.493		60.085	40.311	70.937	56.079	81.41	71.85	101.962	149.88	152	61.979	94.203	79.87		1	1	1	1	1	1	2	2	2	2	2	1		4	2	2	2	2	2
419	wt%	0	0.707	0.201	0.008		13.701	0.077		0	0	0	82.424		90.572	97.118		60.085	40.311	70.937	56.079	81.41	71.85	101.962	149.88	152	61.979	94.203	79.87		1	1	1	1	1	1	2	2	2	2	2	1		4	2	2	2	2	2
420	wt%	0	0	0.017	0.022		88.599	0		0.025	0	0	2.168		100.454	90.831		60.085	40.311	70.937	56.079	81.41	71.85	101.962	149.88	152	61.979	94.203	79.87		1	1	1	1	1	1	2	2	2	2	2	1		4	2	2	2	2	2
421	wt%	0	0	0.043	0.008		88.175	0		0.028	0	0	2.382		100.192	90.636		60.085	40.311	70.937	56.079	81.41	71.85	101.962	149.88	152	61.979	94.203	79.87		1	1	1	1	1	1	2	2	2	2	2	1		4	2	2	2	2	2
422	wt%	0.304	0	0	0.213		86.945	0		0.025	0	0	3.238		100.043	90.725		60.085	40.311	70.937	56.079	81.41	71.85	101.962	149.88	152	61.979	94.203	79.87		1	1	1	1	1	1	2	2	2	2	2	1		4	2	2	2	2	2
423	wt%	0	0	0	0.015		86.882	0		0.039	0	0	2.724		99.034	89.66		60.085	40.311	70.937	56.079	81.41	71.85	101.962	149.88	152	61.979	94.203	79.87		1	1	1	1	1	1	2	2	2	2	2	1		4	2	2	2	2	2
424	wt%	0.004	0.015	0.019	0.025		82.84	0		0.044	0	0	8.817		100.087	91.764		60.085	40.311	70.937	56.079	81.41	71.85	101.962	149.88	152	61.979	94.203	79.87		1	1	1	1	1	1	2	2	2	2	2	1		4	2	2	2	2	2
425	wt%	0.526	0	0.041	0.021		82.799	0		0.025	0	0	7.546		99.333	90.958		60.085	40.311	70.937	56.079	81.41	71.85	101.962	149.88	152	61.979	94.203	79.87		1	1	1	1	1	1	2	2	2	2	2	1		4	2	2	2	2	2
426	wt%	37.45	0.008	0.179	23.103		14.446	22.454		0.041	0	0	0.095		97.7064	97.776		60.085	40.311	70.937	56.079	81.41	71.85	101.962	149.88	152	61.979	94.203	79.87		1	1	1	1	1	1	2	2	2	2	2	1		4	2	2	2	2	2
427	wt%	49.839	0.041	0.186	19.541		10.261	19.142		0.029	0	0	0.09		96.4517	99.129		60.085	40.311	70.937	56.079	81.41	71.85	101.962	149.88	152	61.979	94.203	79.87		1	1	1	1	1	1	2	2	2	2	2	1		4	2	2	2	2	2
428	wt%	90.845	0	0	0.164		1.128	0.028		0.012	0	0	8.505		87.923	100.682		60.085	40.311	70.937	56.079	81.41	71.85	101.962	149.88	152	61.979	94.203	79.87		1	1	1	1	1	1	2	2	2	2	2	1		4	2	2	2	2	2
429	wt%	85.099	0.134	0.004	0.067		0.777	0.899		0.016	0	0	17.192		91.2985	104.188		60.085	40.311	70.937	56.079	81.41	71.85	101.962	149.88	152	61.979	94.203	79.87		1	1	1	1	1	1	2	2	2	2	2	1		4	2	2	2	2	2
430	wt%	63.746	0.907	0.004	0.19		2.25	1.714		0	0	0	28.058		86.0627	96.869		60.085	40.311	70.937	56.079	81.41	71.85	101.962	149.88	152	61.979	94.203	79.87		1	1	1	1	1	1	2	2	2	2	2	1		4	2	2	2	2	2
431	wt%	5.571	0.017	0.004	0.109		1.289	0.682		0.031	0	0	94.984		92.6254	102.687		60.085	40.311	70.937	56.079	81.41	71.85	101.962	149.88	152	61.979	94.203	79.87		1	1	1	1	1	1	2	2	2	2	2	1		4	2	2	2	2	2
432	wt%	26.392	0.363	0	0.16		2.551	19.121		0.029	0	0	42.344		83.6064	90.96		60.085	40.311	70.937	56.079	81.41	71.85	101.962	149.88	152	61.979	94.203	79.87		1	1	1	1	1	1	2	2	2	2	2	1		4	2	2	2	2	2
433	wt%	93.898	0.172	0	1.275		1.208	3.08		0.028	0	0	0.092		87.6298	99.753		60.085	40.311	70.937	56.079	81.41	71.85	101.962	149.88	152	61.979	94.203	79.87		1	1	1	1	1	1	2	2	2	2	2	1		4	2	2	2	2	2
434	wt%	0.034	1.443	0.435	0	0.087	68.9752	1.893	1.08	0.037	0	0	24.15		103.717	98.1342		60.085	40.311	70.937	56.079	81.41	71.85	101.962	149.88	152	61.979	94.203	79.87		1	1	1	1	1	1	2	2	2	2	2	1		4	2	2	2	2	2
435	wt%	0.173	1.411	0.488	0.017	0.148	64.1704	2.328	1.045	0.362	0	0	24.505		99.6514	94.6474		60.085	40.311	70.937	56.079	81.41	71.85	101.962	149.88	152	61.979	94.203	79.87		1	1	1	1	1	1	2	2	2	2	2	1		4	2	2	2	2	2
436	wt%	0.09	1.464	0.429	0	0.039	68.7934	1.891	1.07	0.146	0	0	24.527		103.966	98.4494		60.085	40.311	70.937	56.079	81.41	71.85	101.962	149.88	152	61.979	94.203	79.87		1	1	1	1	1	1	2	2	2	2	2	1		4	2	2	2	2	2
437	wt%	0.034	1.388	0.559	0	0.066	69.075	1.835	1.027	0.11	0	0	24.682		104.318	98.776		60.085	40.311	70.937	56.079	81.41	71.85	101.962	149.88	152	61.979	94.203	79.87		1	1	1	1	1	1	2	2	2	2	2	1		4	2	2	2	2	2
438	wt%	0.036	1.494	0.5	0	0.122	69.3171	1.85	0.986	0.07	0	0	24.683		104.647	99.0581		60.085	40.311	70.937	56.079	81.41	71.85	101.962	149.88	152	61.979	94.203	79.87		1	1	1	1	1	1	2	2	2	2	2	1		4	2	2	2	2	2
439	wt%	0.186	1.824	0.445	0.05	0.193	64.1416	1.905	0.995	0.098	0	0	24.72		99.6212	94.5576		60.085	40.311	70.937	56.079	81.41	71.85	101.962	149.88	152	61.979	94.203	79.87		1	1	1	1	1	1	2	2	2	2	2	1		4	2	2	2	2	2
440	wt%	0.175	1.65	0.474	0.028	0.198	65.4949	1.882	1.002	0.114	0	0	24.85		101.036	95.8679		60.085	40.311	70.937	56.079	81.41	71.85	101.962	149.88	152	61.979	94.203	79.87		1	1	1	1	1	1	2	2	2	2	2	1		4	2	2	2	2	2
441	wt%	0.475	0.371	0.635	0.323	0.182	55.6181	1.823	1.043	0.196	0	0	25.035		89.5204	85.7011		60.085	40.311	70.937	56.079	81.41	71.85	101.962	149.88	152	61.979	94.203	79.87		1	1	1	1	1	1	2	2	2	2	2	1		4	2	2	2	2	2
442	wt%	0.676	1.152	0.563	0.243	0.224	54.7706	1.687	1.049	0.367	0	0	29.729		93.8295	90.4606		60.085	40.311	70.937	56.079	81.41	71.85	101.962	149.88	152	61.979	94.203	79.87		1	1	1	1	1	1	2	2	2	2	2	1		4	2	2	2	2	2
443	wt%	0.329	1.517	0.417	0.055	0.279	64.4465	3.654	0.659	0.07	0	0	23.581		100.145	95.0075		60.085	40.311	70.937	56.079	81.41	71.85	101.962	149.88	152	61.979	94.203	79.87		1	1	1	1	1	1	2	2	2	2	2	1		4	2	2	2	2	2
444	wt%	0.053	2.746	0.564	0	0.144	67.1046	3.114	0.736	0.057	0	0	25.329		105.381	99.8476		60.085	40.311	70.937	56.079	81.41	71.85	101.962	149.88	152	61.979	94.203	79.87		1	1	1	1	1	1	2	2	2	2	2	1		4	2	2	2	2	2
445	wt%	0.066	2.686	0.566	0.021	0.107	66.4882	2.885	0.694	0.05	0	0	25.506		104.502	99.0692		60.085	40.311	70.937	56.079	81.41	71.85	101.962	149.88	152	61.979	94.203	79.87		1	1	1	1	1	1	2	2	2	2	2	1		4	2	2	2	2	2
446	wt%	0.047	2.62	0.489	0	0.027	67.4465	2.823	0.653	0.064	0	0	25.786		105.437	99.9555		60.085	40.311	70.937	56.079	81.41	71.85	101.962	149.88	152	61.979	94.203	79.87		1	1	1	1	1	1	2	2	2	2	2	1		4	2	2	2	2	2
447	wt%	1.746	2.988	0.701	0.638	0.239	53.9961	2.759	0.771	0.07	0	0	30.164		97.606	94.0721		60.085	40.311	70.937	56.079	81.41	71.85	101.962	149.88	152	61.979	94.203	79.87		1	1	1	1	1	1	2	2	2	2	2	1		4	2	2	2	2	2
448	wt%	4.557	2.665	0.682	1.422	0.107	46.6518	2.033	0.593	0.082	0	0	33.26		94.1218	92.0528		60.085	40.311	70.937	56.079	81.41	71.85	101.962	149.88	152	61.979	94.203	79.87		1	1	1	1	1	1	2	2	2	2	2	1		4	2	2	2	2	2
449	wt%	2.088	2.345	0.717	1.035	0.331	49.0111	2.607	0.708	0.111	0	0	33.402		94.907	92.3551		60.085	40.311	70.937	56.079	81.41	71.85	101.962	149.88	152	61.979	94.203	79.87		1	1	1	1	1	1	2	2	2	2	2	1		4	2	2	2	2	2
450	wt%	0.105	0.234	0.892	0.059	0.012	31.535	0.096	0.346	0.099	0	0	59.125		90.2417	92.503		60.085	40.311	70.937	56.079	81.41	71.85	101.962	149.88	152	61.979	94.203	79.87		1	1	1	1	1	1	2	2	2	2	2	1		4	2	2	2	2	2
451	wt%	0.088	0.224	1.088	0.056	0	31.448	0.038	0.28	0.051	0	0	59.486		90.4727	92.759		60.085	40.311	70.937	56.079	81.41	71.85	101.962	149.88	152	61.979	94.203	79.87		1	1	1	1	1	1	2	2	2	2	2	1		4	2	2	2	2	2
452	wt%	0.141	0.206	0.963	0.081	0.029	30.851	0.096	0.337	0	0	0	59.842		90.1397	92.546		60.085	40.311	70.937	56.079	81.41	71.85	101.962	149.88	152	61.979	94.203	79.87		1	1	1	1	1	1	2	2	2	2	2	1		4	2	2	2	2	2
453	wt%	0.16	0.066	1.211	0.055	0.037	29.755	0.246	0.437	0.07	0	0	60.145		89.6185	92.182		60.085	40.311	70.937	56.079	81.41	71.85	101.962	149.88	152	61.979	94.203	79.87		1	1	1	1	1	1	2	2	2	2	2	1		4	2	2	2	2	2
454	wt%	0.154	0.081	1.262	0.039	0.054	30.035	0.21	0.43	0.06	0	0	60.304		90.0896	92.629		60.085	40.311	70.937	56.079	81.41	71.85	101.962	149.88	152	61.979	94.203	79.87		1	1	1	1	1	1	2	2	2	2	2	1		4	2	2	2	2	2
455	wt%	0.169	0.095	1.388	0.06	0	29.406	0.181	0.385	0.042	0	0	60.376		89.4982	92.102		60.085	40.311	70.937	56.079	81.41	71.85	101.962	149.88	152	61.979	94.203	79.87		1	1	1	1	1	1	2	2	2	2	2	1		4	2	2	2	2	2
456	wt%	0.458	0.111	1.885	0.063	0.073	32.176	0.338	0.513	0.194	0	0	55.553		89.5775	91.364		60.085	40.311	70.937	56.079	81.41	71.85	101.962	149.88	152	61.979	94.203	79.87		1	1	1	1	1	1	2	2	2	2	2	1		4	2	2	2	2	2
457	wt%	0.098	0.053	1.85	0.052	0	32.55	0.096	0.48	0.237	0	0	57.997		91.4477	93.413		60.085	40.311	70.937	56.079	81.41	71.85	101.962	149.88	152	61.979	94.203	79.87		1	1	1	1	1	1	2	2	2	2	2	1		4	2	2	2	2	2
458	wt%	0.145	0.081	1.786	0.081	0.131	31.492	0.102	0.508	0.262	0	0	58.2		90.694	92.788		60.085	40.311	70.937	56.079	81.41	71.85	101.962	149.88	152	61.979	94.203	79.87		1	1	1	1	1	1	2	2	2	2	2	1		4	2	2	2	2	2
459	wt%	0.06	0.938	0.496	0	0.256	75.9408	2.235	0.945	0.254	0	0	16.3		104.485	97.4248		60.085	40.311	70.937	56.079	81.41	71.85	101.962	149.88	152	61.979	94.203	79.87		1	1	1	1	1	1	2	2	2	2	2	1		4	2	2	2	2	2
460	wt%	0.006	1.106	0.519	0.011	0.213	74.3202	2.044	0.768	0.208	0	0	18.355		104.266	97.5502		60.085	40.311	70.937	56.079	81.41	71.85	101.962	149.88	152	61.979	94.203	79.87		1	1	1	1	1	1	2	2	2	2	2	1		4	2	2	2	2	2
461	wt%	0.071	1.088	0.42	0.013	0.148	72.8841	1.914	0.993	0.281	0	0	18.398		102.733	96.2101		60.085	40.311	70.937	56.079	81.41	71.85	101.962	149.88	152	61.979	94.203	79.87		1	1	1	1	1	1	2	2	2	2	2	1		4	2	2	2	2	2
462	wt%	0.062	1.106	0.588	0	0.275	73.1747	1.937	0.945	0.24	0	0	18.683		103.571	97.0107		60.085	40.311	70.937	56.079	81.41	71.85	101.962	149.88	152	61.979	94.203	79.87		1	1	1	1	1	1	2	2	2	2	2	1		4	2	2	2	2	2
463	wt%	0.28	1.099	0.706	0.067	0.316	70.0596	2.02	0.89	0.18	0	0	19.107		100.893	94.7246		60.085	40.311	70.937	56.079	81.41	71.85	101.962	149.88	152	61.979	94.203	79.87		1	1	1	1	1	1	2	2	2	2	2	1		4	2	2	2	2	2
464	wt%	0.019	1.094	0.602	0	0.144	73.9531	1.861	0.874	0.213	0	0	19.447		104.77	98.2071		60.085	40.311	70.937	56.079	81.41	71.85	101.962	149.88	152	61.979	94.203	79.87		1	1	1	1	1	1	2	2	2	2	2	1		4	2	2	2	2	2
465	wt%	0.043	2.081	0.718	0.01	0.024	53.9034	0.684	0.586	0.213	0	0	41.023		101.663	99.2854		60.085	40.311	70.937	56.079	81.41	71.85	101.962	149.88	152	61.979	94.203	79.87		1	1	1	1	1	1	2	2	2	2	2	1		4	2	2	2	2	2
466	wt%	0.068	2.134	0.682	0.013	0.083	53.5948	0.682	0.666	0.224	0	0	41.218		101.698	99.3648		60.085	40.311	70.937	56.079	81.41	71.85	101.962	149.88	152	61.979	94.203	79.87		1	1	1	1	1	1	2	2	2	2	2	1		4	2	2	2	2	2
467	wt%	0.043	2.242	0.671	0.003	0	49.7678	0.484	0.516	0.153	0	0	44.614		100.077	98.4938		60.085	40.311	70.937	56.079	81.41	71.85	101.962	149.88	152	61.979	94.203	79.87		1	1	1	1	1	1	2	2	2	2	2	1		4	2	2	2	2	2
468	wt%	0.056	2.366	0.649	0	0	47.9268	0.34	0.527	0.127	0	0	46.586		99.7795	98.5778		60.085	40.311	70.937	56.079	81.41	71.85	101.962	149.88	152	61.979	94.203	79.87		1	1	1	1	1	1	2	2	2	2	2	1		4	2	2	2	2	2
469	wt%	0.006	0	0	0.021		0.457	0		0.023	0	0	100.158		90.7167	100.665		60.085	40.311	70.937	56.079	81.41	71.85	101.962	149.88	152	61.979	94.203	79.87		1	1	1	1	1	1	2	2	2	2	2	1		4	2	2	2	2	2
470	wt%	0	0.002	0.023	0.034		0.444	0		0.019	0	0	99.913		90.5154	100.435		60.085	40.311	70.937	56.079	81.41	71.85	101.962	149.88	152	61.979	94.203	79.87		1	1	1	1	1	1	2	2	2	2	2	1		4	2	2	2	2	2
471	wt%	0	0	0.003	0.003		0.545	0		0.045	0	0	99.878		90.562	100.474		60.085	40.311	70.937	56.079	81.41	71.85	101.962	149.88	152	61.979	94.203	79.87		1	1	1	1	1	1	2	2	2	2	2	1		4	2	2	2	2	2
472	wt%	0.141	0	0	0.085		0.507	0		0.031	0	0	99.569		90.4403	100.333		60.085	40.311	70.937	56.079	81.41	71.85	101.962	149.88	152	61.979	94.203	79.87		1	1	1	1	1	1	2	2	2	2	2	1		4	2	2	2	2	2
473	wt%	0.141	0.007	0	0.071		0.511	0		0.035	0	0	99.656		90.5194	100.421		60.085	40.311	70.937	56.079	81.41	71.85	101.962	149.88	152	61.979	94.203	79.87		1	1	1	1	1	1	2	2	2	2	2	1		4	2	2	2	2	2
474	wt%	0.021	0	0	0.011		84.72	0		0.013	0	0	8.769		102.061	93.534		60.085	40.311	70.937	56.079	81.41	71.85	101.962	149.88	152	61.979	94.203	79.87		1	1	1	1	1	1	2	2	2	2	2	1		4	2	2	2	2	2
475	wt%	0	0.017	0	0.001		83.288	0		0	0	0	9.549		101.15	92.855		60.085	40.311	70.937	56.079	81.41	71.85	101.962	149.88	152	61.979	94.203	79.87		1	1	1	1	1	1	2	2	2	2	2	1		4	2	2	2	2	2
476	wt%	0.006	0	0	0.039		82.652	0.015		0.015	0	0	9.413		100.379	92.14		60.085	40.311	70.937	56.079	81.41	71.85	101.962	149.88	152	61.979	94.203	79.87		1	1	1	1	1	1	2	2	2	2	2	1		4	2	2	2	2	2
477	wt%	0.032	0.005	0.015	0.027		77.55	0		0.006	0	0	17.798		102.266	95.433		60.085	40.311	70.937	56.079	81.41	71.85	101.962	149.88	152	61.979	94.203	79.87		1	1	1	1	1	1	2	2	2	2	2	1		4	2	2	2	2	2
478	wt%	0.28	0.053	0	0.034		73.08	0.062		0.019	0	0	19.541		99.2078	93.069		60.085	40.311	70.937	56.079	81.41	71.85	101.962	149.88	152	61.979	94.203	79.87		1	1	1	1	1	1	2	2	2	2	2	1		4	2	2	2	2	2
479	wt%	11.574	1.239	0.041	0.197		2.832	8.347		0.001	0	0	58.649		76.0795	82.88		60.085	40.311	70.937	56.079	81.41	71.85	101.962	149.88	152	61.979	94.203	79.87		1	1	1	1	1	1	2	2	2	2	2	1		4	2	2	2	2	2
480	wt%	0.892	0.03	0	0.097	0	57.476	0.642	0.466	0.108	0	0	31.907		94.7131	91.618		60.085	40.311	70.937	56.079	81.41	71.85	101.962	149.88	152	61.979	94.203	79.87		1	1	1	1	1	1	2	2	2	2	2	1		4	2	2	2	2	2
481	wt%	0.928	0	0.036	0.021	0	63.197	0	0.39	0.066	0	0	26.752		95.6174	91.39		60.085	40.311	70.937	56.079	81.41	71.85	101.962	149.88	152	61.979	94.203	79.87		1	1	1	1	1	1	2	2	2	2	2	1		4	2	2	2	2	2
482	wt%	0.139	0.045	0.022	0.036	0	85.825	0.009	0.324	0.085	0	0	4.278		99.8604	90.763		60.085	40.311	70.937	56.079	81.41	71.85	101.962	149.88	152	61.979	94.203	79.87		1	1	1	1	1	1	2	2	2	2	2	1		4	2	2	2	2	2
483	wt%	0.032	0.036	0.067	0	0	86.009	0	0.352	0.104	0	0	3.965		99.7265	90.565		60.085	40.311	70.937	56.079	81.41	71.85	101.962	149.88	152	61.979	94.203	79.87		1	1	1	1	1	1	2	2	2	2	2	1		4	2	2	2	2	2
484	wt%	0.338	0.103	0.09	54.081	0.622	1.98	0	0.01	0.009	0	0	0.3		65.4606	57.533		60.085	40.311	70.937	56.079	81.41	71.85	101.962	149.88	152	61.979	94.203	79.87		1	1	1	1	1	1	2	2	2	2	2	1		4	2	2	2	2	2
485	wt%	0.024	2.631	0.81	0	0.05	76.0469	2.503	0.697	0.072	0	0	13.674		104.197	96.5079		60.085	40.311	70.937	56.079	81.41	71.85	101.962	149.88	152	61.979	94.203	79.87		1	1	1	1	1	1	2	2	2	2	2	1		4	2	2	2	2	2
486	wt%	0.083	2.417	0.931	0.008	0	74.5352	0.928	0.746	0	0	0	14.827		101.841	94.4752		60.085	40.311	70.937	56.079	81.41	71.85	101.962	149.88	152	61.979	94.203	79.87		1	1	1	1	1	1	2	2	2	2	2	1		4	2	2	2	2	2
487	wt%	0.043	2.187	0.79	0.024	0.131	71.8979	1.642	0.747	0.025	0	0	16.273		100.648	93.7599		60.085	40.311	70.937	56.079	81.41	71.85	101.962	149.88	152	61.979	94.203	79.87		1	1	1	1	1	1	2	2	2	2	2	1		4	2	2	2	2	2
488	wt%	0.075	2.134	0.861	0	0.144	73.1657	1.5	0.709	0	0	0	16.337		101.939	94.9257		60.085	40.311	70.937	56.079	81.41	71.85	101.962	149.88	152	61.979	94.203	79.87		1	1	1	1	1	1	2	2	2	2	2	1		4	2	2	2	2	2
489	wt%	0.051	2.32	0.976	0.001	0.183	72.4351	1.23	0.708	0.035	0	0	17.029		101.888	94.9681		60.085	40.311	70.937	56.079	81.41	71.85	101.962	149.88	152	61.979	94.203	79.87		1	1	1	1	1	1	2	2	2	2	2	1		4	2	2	2	2	2
490	wt%	0.124	0.831	0.2	0.025	0.147	66.7348	1.298	0.872	0.075	0	0	22.927		98.5403	93.2338		60.085	40.311	70.937	56.079	81.41	71.85	101.962	149.88	152	61.979	94.203	79.87		1	1	1	1	1	1	2	2	2	2	2	1		4	2	2	2	2	2
491	wt%	0.062	1.278	0.146	0.007	0.093	65.4012	1.982	0.852	0.02	0	0	23.853		98.8431	93.6942		60.085	40.311	70.937	56.079	81.41	71.85	101.962	149.88	152	61.979	94.203	79.87		1	1	1	1	1	1	2	2	2	2	2	1		4	2	2	2	2	2
492	wt%	0.075	0.894	0.201	0.01	0.093	65.0944	1.527	0.909	0.02	0	0	24.183		98.0171	93.0064		60.085	40.311	70.937	56.079	81.41	71.85	101.962	149.88	152	61.979	94.203	79.87		1	1	1	1	1	1	2	2	2	2	2	1		4	2	2	2	2	2
493	wt%	0.066	1.287	0.449	0.01	0.052	64.6589	1.164	0.836	0.013	0	0	25.764		99.2072	94.2999		60.085	40.311	70.937	56.079	81.41	71.85	101.962	149.88	152	61.979	94.203	79.87		1	1	1	1	1	1	2	2	2	2	2	1		4	2	2	2	2	2
494	wt%	0.098	0.919	0.296	0.025	0.093	65.3967	1.096	0.87	0.064	0	0	26.181		99.8982	95.0387		60.085	40.311	70.937	56.079	81.41	71.85	101.962	149.88	152	61.979	94.203	79.87		1	1	1	1	1	1	2	2	2	2	2	1		4	2	2	2	2	2
495	wt%	0.062	1.651	0.355	0.004	0.157	61.0551	2.936	0.927	0.041	0	0	26.501		98.1943	93.6891		60.085	40.311	70.937	56.079	81.41	71.85	101.962	149.88	152	61.979	94.203	79.87		1	1	1	1	1	1	2	2	2	2	2	1		4	2	2	2	2	2
496	wt%	0.049	1.927	0.462	0.004	0.149	53.4031	3.541	0.834	0.031	0	0	33.382		96.8184	93.7821		60.085	40.311	70.937	56.079	81.41	71.85	101.962	149.88	152	61.979	94.203	79.87		1	1	1	1	1	1	2	2	2	2	2	1		4	2	2	2	2	2
497	wt%	0.049	1.431	0.343	0.029	0.103	53.4778	2.509	0.859	0.025	0	0	35.801		97.3173	94.6268		60.085	40.311	70.937	56.079	81.41	71.85	101.962	149.88	152	61.979	94.203	79.87		1	1	1	1	1	1	2	2	2	2	2	1		4	2	2	2	2	2
498	wt%	0.064	0.343	0.16	0.013	0	47.1908	0.487	1.005	0.038	0	0	44.349		94.5387	93.6498		60.085	40.311	70.937	56.079	81.41	71.85	101.962	149.88	152	61.979	94.203	79.87		1	1	1	1	1	1	2	2	2	2	2	1		4	2	2	2	2	2
499	wt%	0.036	2.99	1.391	0.02	0.279	73.6111	1.816	0.466	0.028	0	0	13.433		101.673	94.0701		60.085	40.311	70.937	56.079	81.41	71.85	101.962	149.88	152	61.979	94.203	79.87		1	1	1	1	1	1	2	2	2	2	2	1		4	2	2	2	2	2
500	wt%	0.019	2.25	1.034	0.078	0.127	72.3217	1.137	0.427	0.047	0	0	16.588		100.982	94.0287		60.085	40.311	70.937	56.079	81.41	71.85	101.962	149.88	152	61.979	94.203	79.87		1	1	1	1	1	1	2	2	2	2	2	1		4	2	2	2	2	2
501	wt%	0.083	2.431	0.992	0.039	0.21	71.2248	1.491	0.462	0.048	0	0	18.083		101.772	95.0638		60.085	40.311	70.937	56.079	81.41	71.85	101.962	149.88	152	61.979	94.203	79.87		1	1	1	1	1	1	2	2	2	2	2	1		4	2	2	2	2	2
502	wt%	0.011	2.099	1.055	0.035	0.141	69.1436	1.09	0.505	0.022	0	0	18.525		99.0029	92.6266		60.085	40.311	70.937	56.079	81.41	71.85	101.962	149.88	152	61.979	94.203	79.87		1	1	1	1	1	1	2	2	2	2	2	1		4	2	2	2	2	2
503	wt%	0.03	1.743	0.733	0.006	0.137	69.7995	0.812	0.499	0.026	0	0	19.779		99.7748	93.5645		60.085	40.311	70.937	56.079	81.41	71.85	101.962	149.88	152	61.979	94.203	79.87		1	1	1	1	1	1	2	2	2	2	2	1		4	2	2	2	2	2
504	wt%	0.056	1.559	0.609	0.031	0	70.5608	0.438	0.527	0	0	0	20.458		100.402	94.2388		60.085	40.311	70.937	56.079	81.41	71.85	101.962	149.88	152	61.979	94.203	79.87		1	1	1	1	1	1	2	2	2	2	2	1		4	2	2	2	2	2
505	wt%	0	2.034	1.184	0.024	0.205	67.2458	1.27	0.524	0.045	0	0	22.093		100.442	94.6248		60.085	40.311	70.937	56.079	81.41	71.85	101.962	149.88	152	61.979	94.203	79.87		1	1	1	1	1	1	2	2	2	2	2	1		4	2	2	2	2	2
506	wt%	0.231	2.419	0.759	0.006	0.115	63.4621	0.988	0.484	0.077	0	0	22.987		96.8225	91.5281		60.085	40.311	70.937	56.079	81.41	71.85	101.962	149.88	152	61.979	94.203	79.87		1	1	1	1	1	1	2	2	2	2	2	1		4	2	2	2	2	2
507	wt%	0.013	1.879	0.936	0	0.177	63.0437	1.037	0.515	0	0	0	24.366		97.0241	91.9667		60.085	40.311	70.937	56.079	81.41	71.85	101.962	149.88	152	61.979	94.203	79.87		1	1	1	1	1	1	2	2	2	2	2	1		4	2	2	2	2	2
508	wt%	0.757	0.096	0.293	0.227	0.041	47.1458	0.217	0.493	0.047	0	0	32.485		83.779	81.8018		60.085	40.311	70.937	56.079	81.41	71.85	101.962	149.88	152	61.979	94.203	79.87		1	1	1	1	1	1	2	2	2	2	2	1		4	2	2	2	2	2
509	wt%	0.026	0.89	0.338	0.029	0	44.0198	0.41	0.639	0	0	0	47.759		94.4429	94.1108		60.085	40.311	70.937	56.079	81.41	71.85	101.962	149.88	152	61.979	94.203	79.87		1	1	1	1	1	1	2	2	2	2	2	1		4	2	2	2	2	2
510	wt%	0.347	0.078	0.185	0.185	0.162	39.3687	0.385	0.59	0.156	0	0	49.211		90.156	90.6677		60.085	40.311	70.937	56.079	81.41	71.85	101.962	149.88	152	61.979	94.203	79.87		1	1	1	1	1	1	2	2	2	2	2	1		4	2	2	2	2	2
511	wt%	0.047	0.764	0.231	0.034	0.004	44.1827	0.338	0.6	0.003	0	0	49.382		95.7351	95.5857		60.085	40.311	70.937	56.079	81.41	71.85	101.962	149.88	152	61.979	94.203	79.87		1	1	1	1	1	1	2	2	2	2	2	1		4	2	2	2	2	2
512	wt%	0.03	0.602	0.253	0.013	0.026	37.9281	0.253	0.589	0	0	0	56.803		95.1831	96.4971		60.085	40.311	70.937	56.079	81.41	71.85	101.962	149.88	152	61.979	94.203	79.87		1	1	1	1	1	1	2	2	2	2	2	1		4	2	2	2	2	2
513	wt%	1.269	0.23	0.04	44.529	0.293	4.51257	0.064	0.102	0.023	0	0	5.935		63.1488	56.9976		60.085	40.311	70.937	56.079	81.41	71.85	101.962	149.88	152	61.979	94.203	79.87		1	1	1	1	1	1	2	2	2	2	2	1		4	2	2	2	2	2
514	wt%	0.056	0	0.111	0	0	87.62	0.008	0.056	0.088	0	0	0.894		98.4746	88.833		60.085	40.311	70.937	56.079	81.41	71.85	101.962	149.88	152	61.979	94.203	79.87		1	1	1	1	1	1	2	2	2	2	2	1		4	2	2	2	2	2
515	wt%	0.06	0.005	0.231	0.001	0.004	88.241	0	0.049	0.026	0	0	0.217		98.6266	88.834		60.085	40.311	70.937	56.079	81.41	71.85	101.962	149.88	152	61.979	94.203	79.87		1	1	1	1	1	1	2	2	2	2	2	1		4	2	2	2	2	2
516	wt%	0	0	0.191	0	0.116	92.376	0	0.118	0.009	0	0	0.345		103.407	93.155		60.085	40.311	70.937	56.079	81.41	71.85	101.962	149.88	152	61.979	94.203	79.87		1	1	1	1	1	1	2	2	2	2	2	1		4	2	2	2	2	2
517	wt%	0	0.02	0.194	0.003	0.085	92.781	0	0.06	0.001	0	0	0.265		103.716	93.409		60.085	40.311	70.937	56.079	81.41	71.85	101.962	149.88	152	61.979	94.203	79.87		1	1	1	1	1	1	2	2	2	2	2	1		4	2	2	2	2	2
518	wt%	0.308	2.504	0.442	0.031	0.199	62.4912	3.397	1.351	3.568	0	0	21.212		100.85	95.5032		60.085	40.311	70.937	56.079	81.41	71.85	101.962	149.88	152	61.979	94.203	79.87		1	1	1	1	1	1	2	2	2	2	2	1		4	2	2	2	2	2
519	wt%	0.317	2.053	0.501	0.055	0.213	62.6424	3.526	1.32	3.758	0	0	21.469		101.113	95.8544		60.085	40.311	70.937	56.079	81.41	71.85	101.962	149.88	152	61.979	94.203	79.87		1	1	1	1	1	1	2	2	2	2	2	1		4	2	2	2	2	2
520	wt%	0.175	2.243	0.558	0.067	0.148	63.0878	3.057	1.274	3.579	0	0	21.828		101.347	96.0168		60.085	40.311	70.937	56.079	81.41	71.85	101.962	149.88	152	61.979	94.203	79.87		1	1	1	1	1	1	2	2	2	2	2	1		4	2	2	2	2	2
521	wt%	0.511	1.492	0.456	0.153	0.086	63.7258	2.834	1.226	3.797	0	0	21.966		101.436	96.2468		60.085	40.311	70.937	56.079	81.41	71.85	101.962	149.88	152	61.979	94.203	79.87		1	1	1	1	1	1	2	2	2	2	2	1		4	2	2	2	2	2
522	wt%	0.203	2.152	0.418	0.094	0.141	64.3277	2.946	1.32	3.647	0	0	21.584		102.291	96.8327		60.085	40.311	70.937	56.079	81.41	71.85	101.962	149.88	152	61.979	94.203	79.87		1	1	1	1	1	1	2	2	2	2	2	1		4	2	2	2	2	2
523	wt%	0.039	2.225	0.417	0.01	0	66.9192	2.864	1.373	3.766	0	0	20.947		104.38	98.5602		60.085	40.311	70.937	56.079	81.41	71.85	101.962	149.88	152	61.979	94.203	79.87		1	1	1	1	1	1	2	2	2	2	2	1		4	2	2	2	2	2
524	wt%	0.043	2.142	0.433	0.028	0.09	67.1892	2.912	1.348	3.509	0	0	21.084		104.61	98.7782		60.085	40.311	70.937	56.079	81.41	71.85	101.962	149.88	152	61.979	94.203	79.87		1	1	1	1	1	1	2	2	2	2	2	1		4	2	2	2	2	2
525	wt%	0.015	2.222	0.443	0	0.142	67.3241	2.893	1.287	3.616	0	0	21.16		104.964	99.1021		60.085	40.311	70.937	56.079	81.41	71.85	101.962	149.88	152	61.979	94.203	79.87		1	1	1	1	1	1	2	2	2	2	2	1		4	2	2	2	2	2
526	wt%	0	3.918	0.58	0.021	0.141	42.6314	16.002	0.247	33.556	0	0	2.691		105.108	99.7874		60.085	40.311	70.937	56.079	81.41	71.85	101.962	149.88	152	61.979	94.203	79.87		1	1	1	1	1	1	2	2	2	2	2	1		4	2	2	2	2	2
527	wt%	0	4.085	0.637	0.032	0.214	42.9122	16.357	0.284	33.275	0	0	1.665		104.963	99.4612		60.085	40.311	70.937	56.079	81.41	71.85	101.962	149.88	152	61.979	94.203	79.87		1	1	1	1	1	1	2	2	2	2	2	1		4	2	2	2	2	2
528	wt%	0.002	4.107	0.594	0.017	0.249	42.9976	16.185	0.253	33.389	0	0	1.576		104.891	99.3696		60.085	40.311	70.937	56.079	81.41	71.85	101.962	149.88	152	61.979	94.203	79.87		1	1	1	1	1	1	2	2	2	2	2	1		4	2	2	2	2	2
529	wt%	0	4.268	0.609	0.001	0.208	43.4997	16.262	0.256	33.094	0	0	1.563		105.367	99.7607		60.085	40.311	70.937	56.079	81.41	71.85	101.962	149.88	152	61.979	94.203	79.87		1	1	1	1	1	1	2	2	2	2	2	1		4	2	2	2	2	2
530	wt%	0	4.019	0.608	0.038	0.275	43.5033	16.202	0.263	33.132	0	0	1.676		105.274	99.7163		60.085	40.311	70.937	56.079	81.41	71.85	101.962	149.88	152	61.979	94.203	79.87		1	1	1	1	1	1	2	2	2	2	2	1		4	2	2	2	2	2
531	wt%	0	3.855	0.6	0.027	0.134	43.5141	16.383	0.315	32.364	0	0	1.476		104.198	98.6681		60.085	40.311	70.937	56.079	81.41	71.85	101.962	149.88	152	61.979	94.203	79.87		1	1	1	1	1	1	2	2	2	2	2	1		4	2	2	2	2	2
532	wt%	0	3.401	0.841	0.006	0.357	39.6773	18.713	0.271	34.449	0	0	1.877		104.612	99.5923		60.085	40.311	70.937	56.079	81.41	71.85	101.962	149.88	152	61.979	94.203	79.87		1	1	1	1	1	1	2	2	2	2	2	1		4	2	2	2	2	2
533	wt%	0	3.523	0.86	0	0.632	39.9905	18.303	0.344	34.212	0	0	2.078		105.03	99.9425		60.085	40.311	70.937	56.079	81.41	71.85	101.962	149.88	152	61.979	94.203	79.87		1	1	1	1	1	1	2	2	2	2	2	1		4	2	2	2	2	2
534	wt%	0	3.656	0.723	0.003	0.449	40.0409	18.239	0.315	34.013	0	0	2.088		104.612	99.5269		60.085	40.311	70.937	56.079	81.41	71.85	101.962	149.88	152	61.979	94.203	79.87		1	1	1	1	1	1	2	2	2	2	2	1		4	2	2	2	2	2
535	wt%	0	3.454	0.835	0.001	0.524	40.1056	18.424	0.207	34.237	0	0	2.072		104.933	99.8596		60.085	40.311	70.937	56.079	81.41	71.85	101.962	149.88	152	61.979	94.203	79.87		1	1	1	1	1	1	2	2	2	2	2	1		4	2	2	2	2	2
536	wt%	0	3.328	0.829	0.008	0.548	40.2361	18.947	0.243	34.435	0	0	2.058		105.699	100.632		60.085	40.311	70.937	56.079	81.41	71.85	101.962	149.88	152	61.979	94.203	79.87		1	1	1	1	1	1	2	2	2	2	2	1		4	2	2	2	2	2
537	wt%	0	3.648	0.798	0.014	0.466	40.3081	18.28	0.288	34.224	0	0	2.132		105.279	100.158		60.085	40.311	70.937	56.079	81.41	71.85	101.962	149.88	152	61.979	94.203	79.87		1	1	1	1	1	1	2	2	2	2	2	1		4	2	2	2	2	2
538	wt%	7.74	0.469	0.48	0.178	0.152	52.9442	1.03	0.134	20.799	0	0	2.192		90.9357	86.1182		60.085	40.311	70.937	56.079	81.41	71.85	101.962	149.88	152	61.979	94.203	79.87		1	1	1	1	1	1	2	2	2	2	2	1		4	2	2	2	2	2
539	wt%	0.13	0.337	0.585	0.057	0.351	55.649	2.018	0.188	32.394	0	0	1.955		99.8035	93.664		60.085	40.311	70.937	56.079	81.41	71.85	101.962	149.88	152	61.979	94.203	79.87		1	1	1	1	1	1	2	2	2	2	2	1		4	2	2	2	2	2
540	wt%	0.248	1.101	0.745	0.015	0.222	55.8758	4.474	0.21	31.992	0	0	1.541		102.765	96.4238		60.085	40.311	70.937	56.079	81.41	71.85	101.962	149.88	152	61.979	94.203	79.87		1	1	1	1	1	1	2	2	2	2	2	1		4	2	2	2	2	2
541	wt%	0	0.459	0.709	0.021	0.134	57.2759	1.835	0.222	33.047	0	0	1.925		101.98	95.6279		60.085	40.311	70.937	56.079	81.41	71.85	101.962	149.88	152	61.979	94.203	79.87		1	1	1	1	1	1	2	2	2	2	2	1		4	2	2	2	2	2
542	wt%	0	0.958	0.799	0.008	0.27	57.3659	5.237	0.149	31.825	0	0	1.288		104.446	97.8999		60.085	40.311	70.937	56.079	81.41	71.85	101.962	149.88	152	61.979	94.203	79.87		1	1	1	1	1	1	2	2	2	2	2	1		4	2	2	2	2	2
543	wt%	0	0.917	0.79	0	0.143	57.5467	3.639	0.162	31.597	0	0	1.551		102.863	96.3457		60.085	40.311	70.937	56.079	81.41	71.85	101.962	149.88	152	61.979	94.203	79.87		1	1	1	1	1	1	2	2	2	2	2	1		4	2	2	2	2	2
544	wt%	0.075	0.786	0.881	0.027	0.056	57.8887	1.398	0.185	30.228	0	0	1.978		99.9847	93.5027		60.085	40.311	70.937	56.079	81.41	71.85	101.962	149.88	152	61.979	94.203	79.87		1	1	1	1	1	1	2	2	2	2	2	1		4	2	2	2	2	2
545	wt%	0.056	0.657	0.792	0.035	0.173	59.5758	1.387	0.188	30.953	0	0	1.89		102.365	95.7068		60.085	40.311	70.937	56.079	81.41	71.85	101.962	149.88	152	61.979	94.203	79.87		1	1	1	1	1	1	2	2	2	2	2	1		4	2	2	2	2	2
546	wt%	0	0.721	0.806	0	0.052	59.9124	2.396	0.194	31.638	0	0	1.713		104.15	97.4324		60.085	40.311	70.937	56.079	81.41	71.85	101.962	149.88	152	61.979	94.203	79.87		1	1	1	1	1	1	2	2	2	2	2	1		4	2	2	2	2	2
547	wt%	0	0.537	0.817	0	0.209	60.93	1.334	0.222	30.555	0	0	2.012		103.397	96.616		60.085	40.311	70.937	56.079	81.41	71.85	101.962	149.88	152	61.979	94.203	79.87		1	1	1	1	1	1	2	2	2	2	2	1		4	2	2	2	2	2
548	wt%	0.049	6.367	0.455	0.01	0.154	35.5364	15.03	0.199	41.007	0	0	1.968		105.844	100.775		60.085	40.311	70.937	56.079	81.41	71.85	101.962	149.88	152	61.979	94.203	79.87		1	1	1	1	1	1	2	2	2	2	2	1		4	2	2	2	2	2
549	wt%	0.019	5.992	0.501	0	0.167	35.9701	14.872	0.228	41.359	0	0	1.88		106.049	100.988		60.085	40.311	70.937	56.079	81.41	71.85	101.962	149.88	152	61.979	94.203	79.87		1	1	1	1	1	1	2	2	2	2	2	1		4	2	2	2	2	2
550	wt%	0.004	5.851	0.532	0.02	0.121	36.8438	14.943	0.175	41.52	0	0	1.88		107.023	101.89		60.085	40.311	70.937	56.079	81.41	71.85	101.962	149.88	152	61.979	94.203	79.87		1	1	1	1	1	1	2	2	2	2	2	1		4	2	2	2	2	2
551	wt%	0.002	3.724	0.466	0	0.051	59.5452	4.285	0.434	17.806	0	0	11.261		103.853	97.5742		60.085	40.311	70.937	56.079	81.41	71.85	101.962	149.88	152	61.979	94.203	79.87		1	1	1	1	1	1	2	2	2	2	2	1		4	2	2	2	2	2
552	wt%	0.03	3.762	0.471	0.003	0.031	60.1364	4.446	0.435	18.255	0	0	10.627		104.607	98.1964		60.085	40.311	70.937	56.079	81.41	71.85	101.962	149.88	152	61.979	94.203	79.87		1	1	1	1	1	1	2	2	2	2	2	1		4	2	2	2	2	2
553	wt%	0.006	4.15	0.319	0.028		20.007	14.148		56.724	0	0	0.058		98.5151	95.44		60.085	40.311	70.937	56.079	81.41	71.85	101.962	149.88	152	61.979	94.203	79.87		1	1	1	1	1	1	2	2	2	2	2	1		4	2	2	2	2	2
554	wt%	0.002	5.626	0.333	0.024		14.36	19.501		55.749	0	0	0.015		98.3561	95.61		60.085	40.311	70.937	56.079	81.41	71.85	101.962	149.88	152	61.979	94.203	79.87		1	1	1	1	1	1	2	2	2	2	2	1		4	2	2	2	2	2
555	wt%	0	6.037	0.324	0.007		17.97	18.771		54.628	0	0	0.058		101.016	97.795		60.085	40.311	70.937	56.079	81.41	71.85	101.962	149.88	152	61.979	94.203	79.87		1	1	1	1	1	1	2	2	2	2	2	1		4	2	2	2	2	2
556	wt%	0	7.334	0.35	0		19.026	18.739		53.658	0	0	0.01		102.718	99.117		60.085	40.311	70.937	56.079	81.41	71.85	101.962	149.88	152	61.979	94.203	79.87		1	1	1	1	1	1	2	2	2	2	2	1		4	2	2	2	2	2
557	wt%	0	5.147	0.364	0.013		23.573	15.501		53.419	0	0	0.088		101.774	98.105		60.085	40.311	70.937	56.079	81.41	71.85	101.962	149.88	152	61.979	94.203	79.87		1	1	1	1	1	1	2	2	2	2	2	1		4	2	2	2	2	2
558	wt%	0	7.806	0.405	0.003		20.612	18.142		52.934	0	0	0.012		103.791	99.914		60.085	40.311	70.937	56.079	81.41	71.85	101.962	149.88	152	61.979	94.203	79.87		1	1	1	1	1	1	2	2	2	2	2	1		4	2	2	2	2	2
559	wt%	0	7.574	0.311	0		20.443	18.36		52.921	0	0	0.007		103.418	99.616		60.085	40.311	70.937	56.079	81.41	71.85	101.962	149.88	152	61.979	94.203	79.87		1	1	1	1	1	1	2	2	2	2	2	1		4	2	2	2	2	2
560	wt%	0	8.466	0.383	0.008		20.295	17.98		52.719	0	0	0.027		103.847	99.878		60.085	40.311	70.937	56.079	81.41	71.85	101.962	149.88	152	61.979	94.203	79.87		1	1	1	1	1	1	2	2	2	2	2	1		4	2	2	2	2	2
561	wt%	0.002	7.753	0.364	0		20.814	18.18		52.418	0	0	0.003		103.419	99.534		60.085	40.311	70.937	56.079	81.41	71.85	101.962	149.88	152	61.979	94.203	79.87		1	1	1	1	1	1	2	2	2	2	2	1		4	2	2	2	2	2
562	wt%	0	8.221	0.42	0.02		20.491	18.252		52.626	0	0	0.068		104.042	100.098		60.085	40.311	70.937	56.079	81.41	71.85	101.962	149.88	152	61.979	94.203	79.87		1	1	1	1	1	1	2	2	2	2	2	1		4	2	2	2	2	2
563	wt%	28.977	6.891	0.142	0.253		15.752	12.189		19.449	0	0	0.404		83.3342	84.057		60.085	40.311	70.937	56.079	81.41	71.85	101.962	149.88	152	61.979	94.203	79.87		1	1	1	1	1	1	2	2	2	2	2	1		4	2	2	2	2	2
564	wt%	0	4.628	0.567	0.013	0.161	48.9274	4.391	0.277	32.744	0	0	8.235		105.549	99.9434		60.085	40.311	70.937	56.079	81.41	71.85	101.962	149.88	152	61.979	94.203	79.87		1	1	1	1	1	1	2	2	2	2	2	1		4	2	2	2	2	2
565	wt%	0	3.989	0.566	0	0.213	53.7891	4.982	0.387	24.479	0	0	10.592		104.784	98.9971		60.085	40.311	70.937	56.079	81.41	71.85	101.962	149.88	152	61.979	94.203	79.87		1	1	1	1	1	1	2	2	2	2	2	1		4	2	2	2	2	2
566	wt%	0	4.218	0.584	0	0.179	56.646	4.455	0.48	20.068	0	0	12.567		105.148	99.197		60.085	40.311	70.937	56.079	81.41	71.85	101.962	149.88	152	61.979	94.203	79.87		1	1	1	1	1	1	2	2	2	2	2	1		4	2	2	2	2	2
567	wt%	0.006	3.936	0.451	0.02	0.187	57.5764	4.433	0.397	17.938	0	0	13.448		104.29	98.3924		60.085	40.311	70.937	56.079	81.41	71.85	101.962	149.88	152	61.979	94.203	79.87		1	1	1	1	1	1	2	2	2	2	2	1		4	2	2	2	2	2
568	wt%	0	4.067	0.451	0.036	0.119	59.5785	3.924	0.45	13.322	0	0	15.478		103.365	97.4255		60.085	40.311	70.937	56.079	81.41	71.85	101.962	149.88	152	61.979	94.203	79.87		1	1	1	1	1	1	2	2	2	2	2	1		4	2	2	2	2	2
569	wt%	0	3.756	0.578	0.025	0.051	61.6517	3.866	0.494	12.797	0	0	14.905		104.295	98.1237		60.085	40.311	70.937	56.079	81.41	71.85	101.962	149.88	152	61.979	94.203	79.87		1	1	1	1	1	1	2	2	2	2	2	1		4	2	2	2	2	2
570	wt%	0.214	3.845	0.515	0.011	0.103	62.6235	3.397	0.568	11.083	0	0	15.486		104.052	97.8455		60.085	40.311	70.937	56.079	81.41	71.85	101.962	149.88	152	61.979	94.203	79.87		1	1	1	1	1	1	2	2	2	2	2	1		4	2	2	2	2	2
571	wt%	0	3.717	0.545	0	0.072	63.7456	2.706	0.577	9.225	0	0	16.622		103.429	97.2096		60.085	40.311	70.937	56.079	81.41	71.85	101.962	149.88	152	61.979	94.203	79.87		1	1	1	1	1	1	2	2	2	2	2	1		4	2	2	2	2	2
572	wt%	0	3.649	0.483	0	0.224	65.1232	2.993	0.541	9.968	0	0	16.779		106.112	99.7602		60.085	40.311	70.937	56.079	81.41	71.85	101.962	149.88	152	61.979	94.203	79.87		1	1	1	1	1	1	2	2	2	2	2	1		4	2	2	2	2	2
573	wt%	0.09	17.33	0.183	0.013	0.072	19.138	37.037	0.137	25.155	0	0	1.191		105.798	100.346		60.085	40.311	70.937	56.079	81.41	71.85	101.962	149.88	152	61.979	94.203	79.87		1	1	1	1	1	1	2	2	2	2	2	1		4	2	2	2	2	2
574	wt%	0.105	16.69	0.204	0.006	0	19.549	35.618	0.165	26.309	0	0	1.273		105.274	99.919		60.085	40.311	70.937	56.079	81.41	71.85	101.962	149.88	152	61.979	94.203	79.87		1	1	1	1	1	1	2	2	2	2	2	1		4	2	2	2	2	2
575	wt%	0.101	17.237	0.24	0	0.024	19.738	36.868	0.165	25.22	0	0	1.043		106.149	100.636		60.085	40.311	70.937	56.079	81.41	71.85	101.962	149.88	152	61.979	94.203	79.87		1	1	1	1	1	1	2	2	2	2	2	1		4	2	2	2	2	2
576	wt%	0.081	15.321	0.278	0.018	0.021	21.793	36.014	0.15	26.092	0	0	1.284		106.399	101.052		60.085	40.311	70.937	56.079	81.41	71.85	101.962	149.88	152	61.979	94.203	79.87		1	1	1	1	1	1	2	2	2	2	2	1		4	2	2	2	2	2
577	wt%	0.116	11.88	0.203	0.008		22.127	38.788		20.855	0	0	1.341		99.9992	95.318		60.085	40.311	70.937	56.079	81.41	71.85	101.962	149.88	152	61.979	94.203	79.87		1	1	1	1	1	1	2	2	2	2	2	1		4	2	2	2	2	2
578	wt%	0.12	12.858	0.138	0.01		21.381	36.339		22.803	0	0	1.374		99.804	95.023		60.085	40.311	70.937	56.079	81.41	71.85	101.962	149.88	152	61.979	94.203	79.87		1	1	1	1	1	1	2	2	2	2	2	1		4	2	2	2	2	2
579	wt%	3.183	7.771	0.196	0.501		21.276	42.359		16.685	0	0	2.055		97.3907	94.026		60.085	40.311	70.937	56.079	81.41	71.85	101.962	149.88	152	61.979	94.203	79.87		1	1	1	1	1	1	2	2	2	2	2	1		4	2	2	2	2	2
580	wt%	0	15.049	0.227	0		16.539	28.802		39.57	0	0	0.182		105.19	100.369		60.085	40.311	70.937	56.079	81.41	71.85	101.962	149.88	152	61.979	94.203	79.87		1	1	1	1	1	1	2	2	2	2	2	1		4	2	2	2	2	2
581	wt%	0	15.432	0.218	0		16.624	29.211		39.728	0	0	0.122		106.246	101.335		60.085	40.311	70.937	56.079	81.41	71.85	101.962	149.88	152	61.979	94.203	79.87		1	1	1	1	1	1	2	2	2	2	2	1		4	2	2	2	2	2
582	wt%	0.006	15.301	0.165	0.013		16.731	29.199		39.497	0	0	0.133		105.936	101.045		60.085	40.311	70.937	56.079	81.41	71.85	101.962	149.88	152	61.979	94.203	79.87		1	1	1	1	1	1	2	2	2	2	2	1		4	2	2	2	2	2
583	wt%														#DIV/0!	0		60.085	40.311	70.937	56.079	81.41	71.85	101.962	149.88	152	61.979	94.203	79.87		1	1	1	1	1	1	2	2	2	2	2	1		4	2	2	2	2	2
584	wt%														#DIV/0!	0		60.085	40.311	70.937	56.079	81.41	71.85	101.962	149.88	152	61.979	94.203	79.87		1	1	1	1	1	1	2	2	2	2	2	1		4	2	2	2	2	2
585	wt%														#DIV/0!	0		60.085	40.311	70.937	56.079	81.41	71.85	101.962	149.88	152	61.979	94.203	79.87		1	1	1	1	1	1	2	2	2	2	2	1		4	2	2	2	2	2
586	wt%														#DIV/0!	0		60.085	40.311	70.937	56.079	81.41	71.85	101.962	149.88	152	61.979	94.203	79.87		1	1	1	1	1	1	2	2	2	2	2	1		4	2	2	2	2	2
587	wt%														#DIV/0!	0		60.085	40.311	70.937	56.079	81.41	71.85	101.962	149.88	152	61.979	94.203	79.87		1	1	1	1	1	1	2	2	2	2	2	1		4	2	2	2	2	2
588	wt%														#DIV/0!	0		60.085	40.311	70.937	56.079	81.41	71.85	101.962	149.88	152	61.979	94.203	79.87		1	1	1	1	1	1	2	2	2	2	2	1		4	2	2	2	2	2
589	wt%														#DIV/0!	0		60.085	40.311	70.937	56.079	81.41	71.85	101.962	149.88	152	61.979	94.203	79.87		1	1	1	1	1	1	2	2	2	2	2	1		4	2	2	2	2	2
590	wt%														#DIV/0!	0		60.085	40.311	70.937	56.079	81.41	71.85	101.962	149.88	152	61.979	94.203	79.87		1	1	1	1	1	1	2	2	2	2	2	1		4	2	2	2	2	2
591	wt%														#DIV/0!	0		60.085	40.311	70.937	56.079	81.41	71.85	101.962	149.88	152	61.979	94.203	79.87		1	1	1	1	1	1	2	2	2	2	2	1		4	2	2	2	2	2
592	wt%														#DIV/0!	0		60.085	40.311	70.937	56.079	81.41	71.85	101.962	149.88	152	61.979	94.203	79.87		1	1	1	1	1	1	2	2	2	2	2	1		4	2	2	2	2	2
593	wt%														#DIV/0!	0		60.085	40.311	70.937	56.079	81.41	71.85	101.962	149.88	152	61.979	94.203	79.87		1	1	1	1	1	1	2	2	2	2	2	1		4	2	2	2	2	2
594	wt%														#DIV/0!	0		60.085	40.311	70.937	56.079	81.41	71.85	101.962	149.88	152	61.979	94.203	79.87		1	1	1	1	1	1	2	2	2	2	2	1		4	2	2	2	2	2
595	wt%														#DIV/0!	0		60.085	40.311	70.937	56.079	81.41	71.85	101.962	149.88	152	61.979	94.203	79.87		1	1	1	1	1	1	2	2	2	2	2	1		4	2	2	2	2	2
596	wt%														#DIV/0!	0		60.085	40.311	70.937	56.079	81.41	71.85	101.962	149.88	152	61.979	94.203	79.87		1	1	1	1	1	1	2	2	2	2	2	1		4	2	2	2	2	2
597	wt%														#DIV/0!	0		60.085	40.311	70.937	56.079	81.41	71.85	101.962	149.88	152	61.979	94.203	79.87		1	1	1	1	1	1	2	2	2	2	2	1		4	2	2	2	2	2
598	wt%														#DIV/0!	0		60.085	40.311	70.937	56.079	81.41	71.85	101.962	149.88	152	61.979	94.203	79.87		1	1	1	1	1	1	2	2	2	2	2	1		4	2	2	2	2	2
599	wt%														#DIV/0!	0		60.085	40.311	70.937	56.079	81.41	71.85	101.962	149.88	152	61.979	94.203	79.87		1	1	1	1	1	1	2	2	2	2	2	1		4	2	2	2	2	2
600	wt%														#DIV/0!	0		60.085	40.311	70.937	56.079	81.41	71.85	101.962	149.88	152	61.979	94.203	79.87		1	1	1	1	1	1	2	2	2	2	2	1		4	2	2	2	2	2
601	wt%														#DIV/0!	0		60.085	40.311	70.937	56.079	81.41	71.85	101.962	149.88	152	61.979	94.203	79.87		1	1	1	1	1	1	2	2	2	2	2	1		4	2	2	2	2	2
602	wt%														#DIV/0!	0		60.085	40.311	70.937	56.079	81.41	71.85	101.962	149.88	152	61.979	94.203	79.87		1	1	1	1	1	1	2	2	2	2	2	1		4	2	2	2	2	2
603	wt%														#DIV/0!	0		60.085	40.311	70.937	56.079	81.41	71.85	101.962	149.88	152	61.979	94.203	79.87		1	1	1	1	1	1	2	2	2	2	2	1		4	2	2	2	2	2
604	wt%														#DIV/0!	0		60.085	40.311	70.937	56.079	81.41	71.85	101.962	149.88	152	61.979	94.203	79.87		1	1	1	1	1	1	2	2	2	2	2	1		4	2	2	2	2	2
605	wt%														#DIV/0!	0		60.085	40.311	70.937	56.079	81.41	71.85	101.962	149.88	152	61.979	94.203	79.87		1	1	1	1	1	1	2	2	2	2	2	1		4	2	2	2	2	2
606	wt%														#DIV/0!	0		60.085	40.311	70.937	56.079	81.41	71.85	101.962	149.88	152	61.979	94.203	79.87		1	1	1	1	1	1	2	2	2	2	2	1		4	2	2	2	2	2
607	wt%														#DIV/0!	0		60.085	40.311	70.937	56.079	81.41	71.85	101.962	149.88	152	61.979	94.203	79.87		1	1	1	1	1	1	2	2	2	2	2	1		4	2	2	2	2	2
608	wt%														#DIV/0!	0		60.085	40.311	70.937	56.079	81.41	71.85	101.962	149.88	152	61.979	94.203	79.87		1	1	1	1	1	1	2	2	2	2	2	1		4	2	2	2	2	2
609	wt%														#DIV/0!	0		60.085	40.311	70.937	56.079	81.41	71.85	101.962	149.88	152	61.979	94.203	79.87		1	1	1	1	1	1	2	2	2	2	2	1		4	2	2	2	2	2
610	wt%														#DIV/0!	0		60.085	40.311	70.937	56.079	81.41	71.85	101.962	149.88	152	61.979	94.203	79.87		1	1	1	1	1	1	2	2	2	2	2	1		4	2	2	2	2	2
611	wt%														#DIV/0!	0		60.085	40.311	70.937	56.079	81.41	71.85	101.962	149.88	152	61.979	94.203	79.87		1	1	1	1	1	1	2	2	2	2	2	1		4	2	2	2	2	2
612	wt%														#DIV/0!	0		60.085	40.311	70.937	56.079	81.41	71.85	101.962	149.88	152	61.979	94.203	79.87		1	1	1	1	1	1	2	2	2	2	2	1		4	2	2	2	2	2
613	wt%														#DIV/0!	0		60.085	40.311	70.937	56.079	81.41	71.85	101.962	149.88	152	61.979	94.203	79.87		1	1	1	1	1	1	2	2	2	2	2	1		4	2	2	2	2	2
614	wt%														#DIV/0!	0		60.085	40.311	70.937	56.079	81.41	71.85	101.962	149.88	152	61.979	94.203	79.87		1	1	1	1	1	1	2	2	2	2	2	1		4	2	2	2	2	2
615	wt%														#DIV/0!	0		60.085	40.311	70.937	56.079	81.41	71.85	101.962	149.88	152	61.979	94.203	79.87		1	1	1	1	1	1	2	2	2	2	2	1		4	2	2	2	2	2
616	wt%														#DIV/0!	0		60.085	40.311	70.937	56.079	81.41	71.85	101.962	149.88	152	61.979	94.203	79.87		1	1	1	1	1	1	2	2	2	2	2	1		4	2	2	2	2	2
617	wt%														#DIV/0!	0		60.085	40.311	70.937	56.079	81.41	71.85	101.962	149.88	152	61.979	94.203	79.87		1	1	1	1	1	1	2	2	2	2	2	1		4	2	2	2	2	2
618	wt%														#DIV/0!	0		60.085	40.311	70.937	56.079	81.41	71.85	101.962	149.88	152	61.979	94.203	79.87		1	1	1	1	1	1	2	2	2	2	2	1		4	2	2	2	2	2
619	wt%														#DIV/0!	0		60.085	40.311	70.937	56.079	81.41	71.85	101.962	149.88	152	61.979	94.203	79.87		1	1	1	1	1	1	2	2	2	2	2	1		4	2	2	2	2	2
620	wt%														#DIV/0!	0		60.085	40.311	70.937	56.079	81.41	71.85	101.962	149.88	152	61.979	94.203	79.87		1	1	1	1	1	1	2	2	2	2	2	1		4	2	2	2	2	2
621	wt%														#DIV/0!	0		60.085	40.311	70.937	56.079	81.41	71.85	101.962	149.88	152	61.979	94.203	79.87		1	1	1	1	1	1	2	2	2	2	2	1		4	2	2	2	2	2
622	wt%														#DIV/0!	0		60.085	40.311	70.937	56.079	81.41	71.85	101.962	149.88	152	61.979	94.203	79.87		1	1	1	1	1	1	2	2	2	2	2	1		4	2	2	2	2	2
623	wt%														#DIV/0!	0		60.085	40.311	70.937	56.079	81.41	71.85	101.962	149.88	152	61.979	94.203	79.87		1	1	1	1	1	1	2	2	2	2	2	1		4	2	2	2	2	2
624	wt%														#DIV/0!	0		60.085	40.311	70.937	56.079	81.41	71.85	101.962	149.88	152	61.979	94.203	79.87		1	1	1	1	1	1	2	2	2	2	2	1		4	2	2	2	2	2
625	wt%														#DIV/0!	0		60.085	40.311	70.937	56.079	81.41	71.85	101.962	149.88	152	61.979	94.203	79.87		1	1	1	1	1	1	2	2	2	2	2	1		4	2	2	2	2	2
626	wt%														#DIV/0!	0		60.085	40.311	70.937	56.079	81.41	71.85	101.962	149.88	152	61.979	94.203	79.87		1	1	1	1	1	1	2	2	2	2	2	1		4	2	2	2	2	2
627	wt%														#DIV/0!	0		60.085	40.311	70.937	56.079	81.41	71.85	101.962	149.88	152	61.979	94.203	79.87		1	1	1	1	1	1	2	2	2	2	2	1		4	2	2	2	2	2
628	wt%														#DIV/0!	0		60.085	40.311	70.937	56.079	81.41	71.85	101.962	149.88	152	61.979	94.203	79.87		1	1	1	1	1	1	2	2	2	2	2	1		4	2	2	2	2	2
629	wt%														#DIV/0!	0		60.085	40.311	70.937	56.079	81.41	71.85	101.962	149.88	152	61.979	94.203	79.87		1	1	1	1	1	1	2	2	2	2	2	1		4	2	2	2	2	2
630	wt%														#DIV/0!	0		60.085	40.311	70.937	56.079	81.41	71.85	101.962	149.88	152	61.979	94.203	79.87		1	1	1	1	1	1	2	2	2	2	2	1		4	2	2	2	2	2
631	wt%														#DIV/0!	0		60.085	40.311	70.937	56.079	81.41	71.85	101.962	149.88	152	61.979	94.203	79.87		1	1	1	1	1	1	2	2	2	2	2	1		4	2	2	2	2	2
632	wt%														#DIV/0!	0		60.085	40.311	70.937	56.079	81.41	71.85	101.962	149.88	152	61.979	94.203	79.87		1	1	1	1	1	1	2	2	2	2	2	1		4	2	2	2	2	2
633	wt%														#DIV/0!	0		60.085	40.311	70.937	56.079	81.41	71.85	101.962	149.88	152	61.979	94.203	79.87		1	1	1	1	1	1	2	2	2	2	2	1		4	2	2	2	2	2
634	wt%														#DIV/0!	0		60.085	40.311	70.937	56.079	81.41	71.85	101.962	149.88	152	61.979	94.203	79.87		1	1	1	1	1	1	2	2	2	2	2	1		4	2	2	2	2	2
635	wt%														#DIV/0!	0		60.085	40.311	70.937	56.079	81.41	71.85	101.962	149.88	152	61.979	94.203	79.87		1	1	1	1	1	1	2	2	2	2	2	1		4	2	2	2	2	2
636	wt%														#DIV/0!	0		60.085	40.311	70.937	56.079	81.41	71.85	101.962	149.88	152	61.979	94.203	79.87		1	1	1	1	1	1	2	2	2	2	2	1		4	2	2	2	2	2
637	wt%														#DIV/0!	0		60.085	40.311	70.937	56.079	81.41	71.85	101.962	149.88	152	61.979	94.203	79.87		1	1	1	1	1	1	2	2	2	2	2	1		4	2	2	2	2	2
638	wt%														#DIV/0!	0		60.085	40.311	70.937	56.079	81.41	71.85	101.962	149.88	152	61.979	94.203	79.87		1	1	1	1	1	1	2	2	2	2	2	1		4	2	2	2	2	2
639	wt%														#DIV/0!	0		60.085	40.311	70.937	56.079	81.41	71.85	101.962	149.88	152	61.979	94.203	79.87		1	1	1	1	1	1	2	2	2	2	2	1		4	2	2	2	2	2
640	wt%														#DIV/0!	0		60.085	40.311	70.937	56.079	81.41	71.85	101.962	149.88	152	61.979	94.203	79.87		1	1	1	1	1	1	2	2	2	2	2	1		4	2	2	2	2	2
641	wt%														#DIV/0!	0		60.085	40.311	70.937	56.079	81.41	71.85	101.962	149.88	152	61.979	94.203	79.87		1	1	1	1	1	1	2	2	2	2	2	1		4	2	2	2	2	2
642	wt%														#DIV/0!	0		60.085	40.311	70.937	56.079	81.41	71.85	101.962	149.88	152	61.979	94.203	79.87		1	1	1	1	1	1	2	2	2	2	2	1		4	2	2	2	2	2
643	wt%														#DIV/0!	0		60.085	40.311	70.937	56.079	81.41	71.85	101.962	149.88	152	61.979	94.203	79.87		1	1	1	1	1	1	2	2	2	2	2	1		4	2	2	2	2	2
644	wt%														#DIV/0!	0		60.085	40.311	70.937	56.079	81.41	71.85	101.962	149.88	152	61.979	94.203	79.87		1	1	1	1	1	1	2	2	2	2	2	1		4	2	2	2	2	2
645	wt%														#DIV/0!	0		60.085	40.311	70.937	56.079	81.41	71.85	101.962	149.88	152	61.979	94.203	79.87		1	1	1	1	1	1	2	2	2	2	2	1		4	2	2	2	2	2
646	wt%														#DIV/0!	0		60.085	40.311	70.937	56.079	81.41	71.85	101.962	149.88	152	61.979	94.203	79.87		1	1	1	1	1	1	2	2	2	2	2	1		4	2	2	2	2	2
647	wt%														#DIV/0!	0		60.085	40.311	70.937	56.079	81.41	71.85	101.962	149.88	152	61.979	94.203	79.87		1	1	1	1	1	1	2	2	2	2	2	1		4	2	2	2	2	2
648	wt%														#DIV/0!	0		60.085	40.311	70.937	56.079	81.41	71.85	101.962	149.88	152	61.979	94.203	79.87		1	1	1	1	1	1	2	2	2	2	2	1		4	2	2	2	2	2
649	wt%														#DIV/0!	0		60.085	40.311	70.937	56.079	81.41	71.85	101.962	149.88	152	61.979	94.203	79.87		1	1	1	1	1	1	2	2	2	2	2	1		4	2	2	2	2	2
650	wt%														#DIV/0!	0		60.085	40.311	70.937	56.079	81.41	71.85	101.962	149.88	152	61.979	94.203	79.87		1	1	1	1	1	1	2	2	2	2	2	1		4	2	2	2	2	2
651	wt%														#DIV/0!	0		60.085	40.311	70.937	56.079	81.41	71.85	101.962	149.88	152	61.979	94.203	79.87		1	1	1	1	1	1	2	2	2	2	2	1		4	2	2	2	2	2
652	wt%														#DIV/0!	0		60.085	40.311	70.937	56.079	81.41	71.85	101.962	149.88	152	61.979	94.203	79.87		1	1	1	1	1	1	2	2	2	2	2	1		4	2	2	2	2	2
653	wt%														#DIV/0!	0		60.085	40.311	70.937	56.079	81.41	71.85	101.962	149.88	152	61.979	94.203	79.87		1	1	1	1	1	1	2	2	2	2	2	1		4	2	2	2	2	2
654	wt%														#DIV/0!	0		60.085	40.311	70.937	56.079	81.41	71.85	101.962	149.88	152	61.979	94.203	79.87		1	1	1	1	1	1	2	2	2	2	2	1		4	2	2	2	2	2
655	wt%														#DIV/0!	0		60.085	40.311	70.937	56.079	81.41	71.85	101.962	149.88	152	61.979	94.203	79.87		1	1	1	1	1	1	2	2	2	2	2	1		4	2	2	2	2	2
656	wt%														#DIV/0!	0		60.085	40.311	70.937	56.079	81.41	71.85	101.962	149.88	152	61.979	94.203	79.87		1	1	1	1	1	1	2	2	2	2	2	1		4	2	2	2	2	2
657	wt%														#DIV/0!	0		60.085	40.311	70.937	56.079	81.41	71.85	101.962	149.88	152	61.979	94.203	79.87		1	1	1	1	1	1	2	2	2	2	2	1		4	2	2	2	2	2
658	wt%														#DIV/0!	0		60.085	40.311	70.937	56.079	81.41	71.85	101.962	149.88	152	61.979	94.203	79.87		1	1	1	1	1	1	2	2	2	2	2	1		4	2	2	2	2	2
659	wt%														#DIV/0!	0		60.085	40.311	70.937	56.079	81.41	71.85	101.962	149.88	152	61.979	94.203	79.87		1	1	1	1	1	1	2	2	2	2	2	1		4	2	2	2	2	2
660	wt%														#DIV/0!	0		60.085	40.311	70.937	56.079	81.41	71.85	101.962	149.88	152	61.979	94.203	79.87		1	1	1	1	1	1	2	2	2	2	2	1		4	2	2	2	2	2
661	wt%														#DIV/0!	0		60.085	40.311	70.937	56.079	81.41	71.85	101.962	149.88	152	61.979	94.203	79.87		1	1	1	1	1	1	2	2	2	2	2	1		4	2	2	2	2	2
662	wt%														#DIV/0!	0		60.085	40.311	70.937	56.079	81.41	71.85	101.962	149.88	152	61.979	94.203	79.87		1	1	1	1	1	1	2	2	2	2	2	1		4	2	2	2	2	2
663	wt%														#DIV/0!	0		60.085	40.311	70.937	56.079	81.41	71.85	101.962	149.88	152	61.979	94.203	79.87		1	1	1	1	1	1	2	2	2	2	2	1		4	2	2	2	2	2
664	wt%														#DIV/0!	0		60.085	40.311	70.937	56.079	81.41	71.85	101.962	149.88	152	61.979	94.203	79.87		1	1	1	1	1	1	2	2	2	2	2	1		4	2	2	2	2	2
665	wt%														#DIV/0!	0		60.085	40.311	70.937	56.079	81.41	71.85	101.962	149.88	152	61.979	94.203	79.87		1	1	1	1	1	1	2	2	2	2	2	1		4	2	2	2	2	2
666	wt%														#DIV/0!	0		60.085	40.311	70.937	56.079	81.41	71.85	101.962	149.88	152	61.979	94.203	79.87		1	1	1	1	1	1	2	2	2	2	2	1		4	2	2	2	2	2
667	wt%														#DIV/0!	0		60.085	40.311	70.937	56.079	81.41	71.85	101.962	149.88	152	61.979	94.203	79.87		1	1	1	1	1	1	2	2	2	2	2	1		4	2	2	2	2	2
668	wt%														#DIV/0!	0		60.085	40.311	70.937	56.079	81.41	71.85	101.962	149.88	152	61.979	94.203	79.87		1	1	1	1	1	1	2	2	2	2	2	1		4	2	2	2	2	2
669	wt%														#DIV/0!	0		60.085	40.311	70.937	56.079	81.41	71.85	101.962	149.88	152	61.979	94.203	79.87		1	1	1	1	1	1	2	2	2	2	2	1		4	2	2	2	2	2
670	wt%														#DIV/0!	0		60.085	40.311	70.937	56.079	81.41	71.85	101.962	149.88	152	61.979	94.203	79.87		1	1	1	1	1	1	2	2	2	2	2	1		4	2	2	2	2	2
671	wt%														#DIV/0!	0		60.085	40.311	70.937	56.079	81.41	71.85	101.962	149.88	152	61.979	94.203	79.87		1	1	1	1	1	1	2	2	2	2	2	1		4	2	2	2	2	2
672	wt%														#DIV/0!	0		60.085	40.311	70.937	56.079	81.41	71.85	101.962	149.88	152	61.979	94.203	79.87		1	1	1	1	1	1	2	2	2	2	2	1		4	2	2	2	2	2
673	wt%														#DIV/0!	0		60.085	40.311	70.937	56.079	81.41	71.85	101.962	149.88	152	61.979	94.203	79.87		1	1	1	1	1	1	2	2	2	2	2	1		4	2	2	2	2	2
674	wt%														#DIV/0!	0		60.085	40.311	70.937	56.079	81.41	71.85	101.962	149.88	152	61.979	94.203	79.87		1	1	1	1	1	1	2	2	2	2	2	1		4	2	2	2	2	2
675	wt%														#DIV/0!	0		60.085	40.311	70.937	56.079	81.41	71.85	101.962	149.88	152	61.979	94.203	79.87		1	1	1	1	1	1	2	2	2	2	2	1		4	2	2	2	2	2
676	wt%														#DIV/0!	0		60.085	40.311	70.937	56.079	81.41	71.85	101.962	149.88	152	61.979	94.203	79.87		1	1	1	1	1	1	2	2	2	2	2	1		4	2	2	2	2	2
677	wt%														#DIV/0!	0		60.085	40.311	70.937	56.079	81.41	71.85	101.962	149.88	152	61.979	94.203	79.87		1	1	1	1	1	1	2	2	2	2	2	1		4	2	2	2	2	2
678	wt%														#DIV/0!	0		60.085	40.311	70.937	56.079	81.41	71.85	101.962	149.88	152	61.979	94.203	79.87		1	1	1	1	1	1	2	2	2	2	2	1		4	2	2	2	2	2
679	wt%														#DIV/0!	0		60.085	40.311	70.937	56.079	81.41	71.85	101.962	149.88	152	61.979	94.203	79.87		1	1	1	1	1	1	2	2	2	2	2	1		4	2	2	2	2	2
680	wt%														#DIV/0!	0		60.085	40.311	70.937	56.079	81.41	71.85	101.962	149.88	152	61.979	94.203	79.87		1	1	1	1	1	1	2	2	2	2	2	1		4	2	2	2	2	2
681	wt%														#DIV/0!	0		60.085	40.311	70.937	56.079	81.41	71.85	101.962	149.88	152	61.979	94.203	79.87		1	1	1	1	1	1	2	2	2	2	2	1		4	2	2	2	2	2
682	wt%														#DIV/0!	0		60.085	40.311	70.937	56.079	81.41	71.85	101.962	149.88	152	61.979	94.203	79.87		1	1	1	1	1	1	2	2	2	2	2	1		4	2	2	2	2	2
683	wt%														#DIV/0!	0		60.085	40.311	70.937	56.079	81.41	71.85	101.962	149.88	152	61.979	94.203	79.87		1	1	1	1	1	1	2	2	2	2	2	1		4	2	2	2	2	2
684	wt%														#DIV/0!	0		60.085	40.311	70.937	56.079	81.41	71.85	101.962	149.88	152	61.979	94.203	79.87		1	1	1	1	1	1	2	2	2	2	2	1		4	2	2	2	2	2
685	wt%														#DIV/0!	0		60.085	40.311	70.937	56.079	81.41	71.85	101.962	149.88	152	61.979	94.203	79.87		1	1	1	1	1	1	2	2	2	2	2	1		4	2	2	2	2	2
686	wt%														#DIV/0!	0		60.085	40.311	70.937	56.079	81.41	71.85	101.962	149.88	152	61.979	94.203	79.87		1	1	1	1	1	1	2	2	2	2	2	1		4	2	2	2	2	2
687	wt%														#DIV/0!	0		60.085	40.311	70.937	56.079	81.41	71.85	101.962	149.88	152	61.979	94.203	79.87		1	1	1	1	1	1	2	2	2	2	2	1		4	2	2	2	2	2
688	wt%														#DIV/0!	0		60.085	40.311	70.937	56.079	81.41	71.85	101.962	149.88	152	61.979	94.203	79.87		1	1	1	1	1	1	2	2	2	2	2	1		4	2	2	2	2	2
689	wt%														#DIV/0!	0		60.085	40.311	70.937	56.079	81.41	71.85	101.962	149.88	152	61.979	94.203	79.87		1	1	1	1	1	1	2	2	2	2	2	1		4	2	2	2	2	2
690	wt%														#DIV/0!	0		60.085	40.311	70.937	56.079	81.41	71.85	101.962	149.88	152	61.979	94.203	79.87		1	1	1	1	1	1	2	2	2	2	2	1		4	2	2	2	2	2
691	wt%														#DIV/0!	0		60.085	40.311	70.937	56.079	81.41	71.85	101.962	149.88	152	61.979	94.203	79.87		1	1	1	1	1	1	2	2	2	2	2	1		4	2	2	2	2	2
692	wt%														#DIV/0!	0		60.085	40.311	70.937	56.079	81.41	71.85	101.962	149.88	152	61.979	94.203	79.87		1	1	1	1	1	1	2	2	2	2	2	1		4	2	2	2	2	2
693	wt%														#DIV/0!	0		60.085	40.311	70.937	56.079	81.41	71.85	101.962	149.88	152	61.979	94.203	79.87		1	1	1	1	1	1	2	2	2	2	2	1		4	2	2	2	2	2
694	wt%														#DIV/0!	0		60.085	40.311	70.937	56.079	81.41	71.85	101.962	149.88	152	61.979	94.203	79.87		1	1	1	1	1	1	2	2	2	2	2	1		4	2	2	2	2	2
695	wt%														#DIV/0!	0		60.085	40.311	70.937	56.079	81.41	71.85	101.962	149.88	152	61.979	94.203	79.87		1	1	1	1	1	1	2	2	2	2	2	1		4	2	2	2	2	2
696	wt%														#DIV/0!	0		60.085	40.311	70.937	56.079	81.41	71.85	101.962	149.88	152	61.979	94.203	79.87		1	1	1	1	1	1	2	2	2	2	2	1		4	2	2	2	2	2
697	wt%														#DIV/0!	0		60.085	40.311	70.937	56.079	81.41	71.85	101.962	149.88	152	61.979	94.203	79.87		1	1	1	1	1	1	2	2	2	2	2	1		4	2	2	2	2	2
698	wt%														#DIV/0!	0		60.085	40.311	70.937	56.079	81.41	71.85	101.962	149.88	152	61.979	94.203	79.87		1	1	1	1	1	1	2	2	2	2	2	1		4	2	2	2	2	2
699	wt%														#DIV/0!	0		60.085	40.311	70.937	56.079	81.41	71.85	101.962	149.88	152	61.979	94.203	79.87		1	1	1	1	1	1	2	2	2	2	2	1		4	2	2	2	2	2
700	wt%														#DIV/0!	0		60.085	40.311	70.937	56.079	81.41	71.85	101.962	149.88	152	61.979	94.203	79.87		1	1	1	1	1	1	2	2	2	2	2	1		4	2	2	2	2	2
701	wt%														#DIV/0!	0		60.085	40.311	70.937	56.079	81.41	71.85	101.962	149.88	152	61.979	94.203	79.87		1	1	1	1	1	1	2	2	2	2	2	1		4	2	2	2	2	2
702	wt%														#DIV/0!	0		60.085	40.311	70.937	56.079	81.41	71.85	101.962	149.88	152	61.979	94.203	79.87		1	1	1	1	1	1	2	2	2	2	2	1		4	2	2	2	2	2
703	wt%														#DIV/0!	0		60.085	40.311	70.937	56.079	81.41	71.85	101.962	149.88	152	61.979	94.203	79.87		1	1	1	1	1	1	2	2	2	2	2	1		4	2	2	2	2	2
704	wt%														#DIV/0!	0		60.085	40.311	70.937	56.079	81.41	71.85	101.962	149.88	152	61.979	94.203	79.87		1	1	1	1	1	1	2	2	2	2	2	1		4	2	2	2	2	2
705	wt%														#DIV/0!	0		60.085	40.311	70.937	56.079	81.41	71.85	101.962	149.88	152	61.979	94.203	79.87		1	1	1	1	1	1	2	2	2	2	2	1		4	2	2	2	2	2
706	wt%														#DIV/0!	0		60.085	40.311	70.937	56.079	81.41	71.85	101.962	149.88	152	61.979	94.203	79.87		1	1	1	1	1	1	2	2	2	2	2	1		4	2	2	2	2	2
707	wt%														#DIV/0!	0		60.085	40.311	70.937	56.079	81.41	71.85	101.962	149.88	152	61.979	94.203	79.87		1	1	1	1	1	1	2	2	2	2	2	1		4	2	2	2	2	2
708	wt%														#DIV/0!	0		60.085	40.311	70.937	56.079	81.41	71.85	101.962	149.88	152	61.979	94.203	79.87		1	1	1	1	1	1	2	2	2	2	2	1		4	2	2	2	2	2
709	wt%														#DIV/0!	0		60.085	40.311	70.937	56.079	81.41	71.85	101.962	149.88	152	61.979	94.203	79.87		1	1	1	1	1	1	2	2	2	2	2	1		4	2	2	2	2	2
710	wt%														#DIV/0!	0		60.085	40.311	70.937	56.079	81.41	71.85	101.962	149.88	152	61.979	94.203	79.87		1	1	1	1	1	1	2	2	2	2	2	1		4	2	2	2	2	2
711	wt%														#DIV/0!	0		60.085	40.311	70.937	56.079	81.41	71.85	101.962	149.88	152	61.979	94.203	79.87		1	1	1	1	1	1	2	2	2	2	2	1		4	2	2	2	2	2
712	wt%														#DIV/0!	0		60.085	40.311	70.937	56.079	81.41	71.85	101.962	149.88	152	61.979	94.203	79.87		1	1	1	1	1	1	2	2	2	2	2	1		4	2	2	2	2	2
713	wt%														#DIV/0!	0		60.085	40.311	70.937	56.079	81.41	71.85	101.962	149.88	152	61.979	94.203	79.87		1	1	1	1	1	1	2	2	2	2	2	1		4	2	2	2	2	2
714	wt%														#DIV/0!	0		60.085	40.311	70.937	56.079	81.41	71.85	101.962	149.88	152	61.979	94.203	79.87		1	1	1	1	1	1	2	2	2	2	2	1		4	2	2	2	2	2
715	wt%														#DIV/0!	0		60.085	40.311	70.937	56.079	81.41	71.85	101.962	149.88	152	61.979	94.203	79.87		1	1	1	1	1	1	2	2	2	2	2	1		4	2	2	2	2	2
716	wt%														#DIV/0!	0		60.085	40.311	70.937	56.079	81.41	71.85	101.962	149.88	152	61.979	94.203	79.87		1	1	1	1	1	1	2	2	2	2	2	1		4	2	2	2	2	2
717	wt%														#DIV/0!	0		60.085	40.311	70.937	56.079	81.41	71.85	101.962	149.88	152	61.979	94.203	79.87		1	1	1	1	1	1	2	2	2	2	2	1		4	2	2	2	2	2
718	wt%														#DIV/0!	0		60.085	40.311	70.937	56.079	81.41	71.85	101.962	149.88	152	61.979	94.203	79.87		1	1	1	1	1	1	2	2	2	2	2	1		4	2	2	2	2	2
719	wt%														#DIV/0!	0		60.085	40.311	70.937	56.079	81.41	71.85	101.962	149.88	152	61.979	94.203	79.87		1	1	1	1	1	1	2	2	2	2	2	1		4	2	2	2	2	2
720	wt%														#DIV/0!	0		60.085	40.311	70.937	56.079	81.41	71.85	101.962	149.88	152	61.979	94.203	79.87		1	1	1	1	1	1	2	2	2	2	2	1		4	2	2	2	2	2
721	wt%														#DIV/0!	0		60.085	40.311	70.937	56.079	81.41	71.85	101.962	149.88	152	61.979	94.203	79.87		1	1	1	1	1	1	2	2	2	2	2	1		4	2	2	2	2	2
722	wt%														#DIV/0!	0		60.085	40.311	70.937	56.079	81.41	71.85	101.962	149.88	152	61.979	94.203	79.87		1	1	1	1	1	1	2	2	2	2	2	1		4	2	2	2	2	2
723	wt%														#DIV/0!	0		60.085	40.311	70.937	56.079	81.41	71.85	101.962	149.88	152	61.979	94.203	79.87		1	1	1	1	1	1	2	2	2	2	2	1		4	2	2	2	2	2
724	wt%														#DIV/0!	0		60.085	40.311	70.937	56.079	81.41	71.85	101.962	149.88	152	61.979	94.203	79.87		1	1	1	1	1	1	2	2	2	2	2	1		4	2	2	2	2	2
725	wt%														#DIV/0!	0		60.085	40.311	70.937	56.079	81.41	71.85	101.962	149.88	152	61.979	94.203	79.87		1	1	1	1	1	1	2	2	2	2	2	1		4	2	2	2	2	2
726	wt%														#DIV/0!	0		60.085	40.311	70.937	56.079	81.41	71.85	101.962	149.88	152	61.979	94.203	79.87		1	1	1	1	1	1	2	2	2	2	2	1		4	2	2	2	2	2
727	wt%														#DIV/0!	0		60.085	40.311	70.937	56.079	81.41	71.85	101.962	149.88	152	61.979	94.203	79.87		1	1	1	1	1	1	2	2	2	2	2	1		4	2	2	2	2	2
728	wt%														#DIV/0!	0		60.085	40.311	70.937	56.079	81.41	71.85	101.962	149.88	152	61.979	94.203	79.87		1	1	1	1	1	1	2	2	2	2	2	1		4	2	2	2	2	2
729	wt%														#DIV/0!	0		60.085	40.311	70.937	56.079	81.41	71.85	101.962	149.88	152	61.979	94.203	79.87		1	1	1	1	1	1	2	2	2	2	2	1		4	2	2	2	2	2
730	wt%														#DIV/0!	0		60.085	40.311	70.937	56.079	81.41	71.85	101.962	149.88	152	61.979	94.203	79.87		1	1	1	1	1	1	2	2	2	2	2	1		4	2	2	2	2	2
731	wt%														#DIV/0!	0		60.085	40.311	70.937	56.079	81.41	71.85	101.962	149.88	152	61.979	94.203	79.87		1	1	1	1	1	1	2	2	2	2	2	1		4	2	2	2	2	2
732	wt%														#DIV/0!	0		60.085	40.311	70.937	56.079	81.41	71.85	101.962	149.88	152	61.979	94.203	79.87		1	1	1	1	1	1	2	2	2	2	2	1		4	2	2	2	2	2
733	wt%														#DIV/0!	0		60.085	40.311	70.937	56.079	81.41	71.85	101.962	149.88	152	61.979	94.203	79.87		1	1	1	1	1	1	2	2	2	2	2	1		4	2	2	2	2	2
734	wt%														#DIV/0!	0		60.085	40.311	70.937	56.079	81.41	71.85	101.962	149.88	152	61.979	94.203	79.87		1	1	1	1	1	1	2	2	2	2	2	1		4	2	2	2	2	2
735	wt%														#DIV/0!	0		60.085	40.311	70.937	56.079	81.41	71.85	101.962	149.88	152	61.979	94.203	79.87		1	1	1	1	1	1	2	2	2	2	2	1		4	2	2	2	2	2
736	wt%														#DIV/0!	0		60.085	40.311	70.937	56.079	81.41	71.85	101.962	149.88	152	61.979	94.203	79.87		1	1	1	1	1	1	2	2	2	2	2	1		4	2	2	2	2	2
737	wt%														#DIV/0!	0		60.085	40.311	70.937	56.079	81.41	71.85	101.962	149.88	152	61.979	94.203	79.87		1	1	1	1	1	1	2	2	2	2	2	1		4	2	2	2	2	2
738	wt%														#DIV/0!	0		60.085	40.311	70.937	56.079	81.41	71.85	101.962	149.88	152	61.979	94.203	79.87		1	1	1	1	1	1	2	2	2	2	2	1		4	2	2	2	2	2
739	wt%														#DIV/0!	0		60.085	40.311	70.937	56.079	81.41	71.85	101.962	149.88	152	61.979	94.203	79.87		1	1	1	1	1	1	2	2	2	2	2	1		4	2	2	2	2	2
740	wt%														#DIV/0!	0		60.085	40.311	70.937	56.079	81.41	71.85	101.962	149.88	152	61.979	94.203	79.87		1	1	1	1	1	1	2	2	2	2	2	1		4	2	2	2	2	2
741	wt%														#DIV/0!	0		60.085	40.311	70.937	56.079	81.41	71.85	101.962	149.88	152	61.979	94.203	79.87		1	1	1	1	1	1	2	2	2	2	2	1		4	2	2	2	2	2
742	wt%														#DIV/0!	0		60.085	40.311	70.937	56.079	81.41	71.85	101.962	149.88	152	61.979	94.203	79.87		1	1	1	1	1	1	2	2	2	2	2	1		4	2	2	2	2	2
743	wt%														#DIV/0!	0		60.085	40.311	70.937	56.079	81.41	71.85	101.962	149.88	152	61.979	94.203	79.87		1	1	1	1	1	1	2	2	2	2	2	1		4	2	2	2	2	2
744	wt%														#DIV/0!	0		60.085	40.311	70.937	56.079	81.41	71.85	101.962	149.88	152	61.979	94.203	79.87		1	1	1	1	1	1	2	2	2	2	2	1		4	2	2	2	2	2
745	wt%														#DIV/0!	0		60.085	40.311	70.937	56.079	81.41	71.85	101.962	149.88	152	61.979	94.203	79.87		1	1	1	1	1	1	2	2	2	2	2	1		4	2	2	2	2	2
746	wt%														#DIV/0!	0		60.085	40.311	70.937	56.079	81.41	71.85	101.962	149.88	152	61.979	94.203	79.87		1	1	1	1	1	1	2	2	2	2	2	1		4	2	2	2	2	2
747	wt%														#DIV/0!	0		60.085	40.311	70.937	56.079	81.41	71.85	101.962	149.88	152	61.979	94.203	79.87		1	1	1	1	1	1	2	2	2	2	2	1		4	2	2	2	2	2
748	wt%														#DIV/0!	0		60.085	40.311	70.937	56.079	81.41	71.85	101.962	149.88	152	61.979	94.203	79.87		1	1	1	1	1	1	2	2	2	2	2	1		4	2	2	2	2	2
749	wt%														#DIV/0!	0		60.085	40.311	70.937	56.079	81.41	71.85	101.962	149.88	152	61.979	94.203	79.87		1	1	1	1	1	1	2	2	2	2	2	1		4	2	2	2	2	2
750	wt%														#DIV/0!	0		60.085	40.311	70.937	56.079	81.41	71.85	101.962	149.88	152	61.979	94.203	79.87		1	1	1	1	1	1	2	2	2	2	2	1		4	2	2	2	2	2
751	wt%														#DIV/0!	0		60.085	40.311	70.937	56.079	81.41	71.85	101.962	149.88	152	61.979	94.203	79.87		1	1	1	1	1	1	2	2	2	2	2	1		4	2	2	2	2	2
752	wt%														#DIV/0!	0		60.085	40.311	70.937	56.079	81.41	71.85	101.962	149.88	152	61.979	94.203	79.87		1	1	1	1	1	1	2	2	2	2	2	1		4	2	2	2	2	2
753	wt%														#DIV/0!	0		60.085	40.311	70.937	56.079	81.41	71.85	101.962	149.88	152	61.979	94.203	79.87		1	1	1	1	1	1	2	2	2	2	2	1		4	2	2	2	2	2
754	wt%														#DIV/0!	0		60.085	40.311	70.937	56.079	81.41	71.85	101.962	149.88	152	61.979	94.203	79.87		1	1	1	1	1	1	2	2	2	2	2	1		4	2	2	2	2	2
755	wt%														#DIV/0!	0		60.085	40.311	70.937	56.079	81.41	71.85	101.962	149.88	152	61.979	94.203	79.87		1	1	1	1	1	1	2	2	2	2	2	1		4	2	2	2	2	2
756	wt%														#DIV/0!	0		60.085	40.311	70.937	56.079	81.41	71.85	101.962	149.88	152	61.979	94.203	79.87		1	1	1	1	1	1	2	2	2	2	2	1		4	2	2	2	2	2
757	wt%														#DIV/0!	0		60.085	40.311	70.937	56.079	81.41	71.85	101.962	149.88	152	61.979	94.203	79.87		1	1	1	1	1	1	2	2	2	2	2	1		4	2	2	2	2	2
758	wt%														#DIV/0!	0		60.085	40.311	70.937	56.079	81.41	71.85	101.962	149.88	152	61.979	94.203	79.87		1	1	1	1	1	1	2	2	2	2	2	1		4	2	2	2	2	2
759	wt%														#DIV/0!	0		60.085	40.311	70.937	56.079	81.41	71.85	101.962	149.88	152	61.979	94.203	79.87		1	1	1	1	1	1	2	2	2	2	2	1		4	2	2	2	2	2
760	wt%														#DIV/0!	0		60.085	40.311	70.937	56.079	81.41	71.85	101.962	149.88	152	61.979	94.203	79.87		1	1	1	1	1	1	2	2	2	2	2	1		4	2	2	2	2	2
761	wt%														#DIV/0!	0		60.085	40.311	70.937	56.079	81.41	71.85	101.962	149.88	152	61.979	94.203	79.87		1	1	1	1	1	1	2	2	2	2	2	1		4	2	2	2	2	2
762	wt%														#DIV/0!	0		60.085	40.311	70.937	56.079	81.41	71.85	101.962	149.88	152	61.979	94.203	79.87		1	1	1	1	1	1	2	2	2	2	2	1		4	2	2	2	2	2
763	wt%														#DIV/0!	0		60.085	40.311	70.937	56.079	81.41	71.85	101.962	149.88	152	61.979	94.203	79.87		1	1	1	1	1	1	2	2	2	2	2	1		4	2	2	2	2	2
764	wt%														#DIV/0!	0		60.085	40.311	70.937	56.079	81.41	71.85	101.962	149.88	152	61.979	94.203	79.87		1	1	1	1	1	1	2	2	2	2	2	1		4	2	2	2	2	2
765	wt%														#DIV/0!	0		60.085	40.311	70.937	56.079	81.41	71.85	101.962	149.88	152	61.979	94.203	79.87		1	1	1	1	1	1	2	2	2	2	2	1		4	2	2	2	2	2
766	wt%														#DIV/0!	0		60.085	40.311	70.937	56.079	81.41	71.85	101.962	149.88	152	61.979	94.203	79.87		1	1	1	1	1	1	2	2	2	2	2	1		4	2	2	2	2	2
767	wt%														#DIV/0!	0		60.085	40.311	70.937	56.079	81.41	71.85	101.962	149.88	152	61.979	94.203	79.87		1	1	1	1	1	1	2	2	2	2	2	1		4	2	2	2	2	2
768	wt%														#DIV/0!	0		60.085	40.311	70.937	56.079	81.41	71.85	101.962	149.88	152	61.979	94.203	79.87		1	1	1	1	1	1	2	2	2	2	2	1		4	2	2	2	2	2
769	wt%														#DIV/0!	0		60.085	40.311	70.937	56.079	81.41	71.85	101.962	149.88	152	61.979	94.203	79.87		1	1	1	1	1	1	2	2	2	2	2	1		4	2	2	2	2	2
770	wt%														#DIV/0!	0		60.085	40.311	70.937	56.079	81.41	71.85	101.962	149.88	152	61.979	94.203	79.87		1	1	1	1	1	1	2	2	2	2	2	1		4	2	2	2	2	2
771	wt%														#DIV/0!	0		60.085	40.311	70.937	56.079	81.41	71.85	101.962	149.88	152	61.979	94.203	79.87		1	1	1	1	1	1	2	2	2	2	2	1		4	2	2	2	2	2
772	wt%														#DIV/0!	0		60.085	40.311	70.937	56.079	81.41	71.85	101.962	149.88	152	61.979	94.203	79.87		1	1	1	1	1	1	2	2	2	2	2	1		4	2	2	2	2	2
773	wt%														#DIV/0!	0		60.085	40.311	70.937	56.079	81.41	71.85	101.962	149.88	152	61.979	94.203	79.87		1	1	1	1	1	1	2	2	2	2	2	1		4	2	2	2	2	2
774	wt%														#DIV/0!	0		60.085	40.311	70.937	56.079	81.41	71.85	101.962	149.88	152	61.979	94.203	79.87		1	1	1	1	1	1	2	2	2	2	2	1		4	2	2	2	2	2
775	wt%														#DIV/0!	0		60.085	40.311	70.937	56.079	81.41	71.85	101.962	149.88	152	61.979	94.203	79.87		1	1	1	1	1	1	2	2	2	2	2	1		4	2	2	2	2	2
776	wt%														#DIV/0!	0		60.085	40.311	70.937	56.079	81.41	71.85	101.962	149.88	152	61.979	94.203	79.87		1	1	1	1	1	1	2	2	2	2	2	1		4	2	2	2	2	2
777	wt%														#DIV/0!	0		60.085	40.311	70.937	56.079	81.41	71.85	101.962	149.88	152	61.979	94.203	79.87		1	1	1	1	1	1	2	2	2	2	2	1		4	2	2	2	2	2
778	wt%														#DIV/0!	0		60.085	40.311	70.937	56.079	81.41	71.85	101.962	149.88	152	61.979	94.203	79.87		1	1	1	1	1	1	2	2	2	2	2	1		4	2	2	2	2	2
779	wt%														#DIV/0!	0		60.085	40.311	70.937	56.079	81.41	71.85	101.962	149.88	152	61.979	94.203	79.87		1	1	1	1	1	1	2	2	2	2	2	1		4	2	2	2	2	2
780	wt%														#DIV/0!	0		60.085	40.311	70.937	56.079	81.41	71.85	101.962	149.88	152	61.979	94.203	79.87		1	1	1	1	1	1	2	2	2	2	2	1		4	2	2	2	2	2
781	wt%														#DIV/0!	0		60.085	40.311	70.937	56.079	81.41	71.85	101.962	149.88	152	61.979	94.203	79.87		1	1	1	1	1	1	2	2	2	2	2	1		4	2	2	2	2	2
782	wt%														#DIV/0!	0		60.085	40.311	70.937	56.079	81.41	71.85	101.962	149.88	152	61.979	94.203	79.87		1	1	1	1	1	1	2	2	2	2	2	1		4	2	2	2	2	2
783	wt%														#DIV/0!	0		60.085	40.311	70.937	56.079	81.41	71.85	101.962	149.88	152	61.979	94.203	79.87		1	1	1	1	1	1	2	2	2	2	2	1		4	2	2	2	2	2
784	wt%														#DIV/0!	0		60.085	40.311	70.937	56.079	81.41	71.85	101.962	149.88	152	61.979	94.203	79.87		1	1	1	1	1	1	2	2	2	2	2	1		4	2	2	2	2	2
785	wt%														#DIV/0!	0		60.085	40.311	70.937	56.079	81.41	71.85	101.962	149.88	152	61.979	94.203	79.87		1	1	1	1	1	1	2	2	2	2	2	1		4	2	2	2	2	2
786	wt%														#DIV/0!	0		60.085	40.311	70.937	56.079	81.41	71.85	101.962	149.88	152	61.979	94.203	79.87		1	1	1	1	1	1	2	2	2	2	2	1		4	2	2	2	2	2
787	wt%														#DIV/0!	0		60.085	40.311	70.937	56.079	81.41	71.85	101.962	149.88	152	61.979	94.203	79.87		1	1	1	1	1	1	2	2	2	2	2	1		4	2	2	2	2	2
788	wt%														#DIV/0!	0		60.085	40.311	70.937	56.079	81.41	71.85	101.962	149.88	152	61.979	94.203	79.87		1	1	1	1	1	1	2	2	2	2	2	1		4	2	2	2	2	2
789	wt%														#DIV/0!	0		60.085	40.311	70.937	56.079	81.41	71.85	101.962	149.88	152	61.979	94.203	79.87		1	1	1	1	1	1	2	2	2	2	2	1		4	2	2	2	2	2
790	wt%														#DIV/0!	0		60.085	40.311	70.937	56.079	81.41	71.85	101.962	149.88	152	61.979	94.203	79.87		1	1	1	1	1	1	2	2	2	2	2	1		4	2	2	2	2	2
791	wt%														#DIV/0!	0		60.085	40.311	70.937	56.079	81.41	71.85	101.962	149.88	152	61.979	94.203	79.87		1	1	1	1	1	1	2	2	2	2	2	1		4	2	2	2	2	2
792	wt%														#DIV/0!	0		60.085	40.311	70.937	56.079	81.41	71.85	101.962	149.88	152	61.979	94.203	79.87		1	1	1	1	1	1	2	2	2	2	2	1		4	2	2	2	2	2
793	wt%														#DIV/0!	0		60.085	40.311	70.937	56.079	81.41	71.85	101.962	149.88	152	61.979	94.203	79.87		1	1	1	1	1	1	2	2	2	2	2	1		4	2	2	2	2	2
794	wt%														#DIV/0!	0		60.085	40.311	70.937	56.079	81.41	71.85	101.962	149.88	152	61.979	94.203	79.87		1	1	1	1	1	1	2	2	2	2	2	1		4	2	2	2	2	2
795	wt%														#DIV/0!	0		60.085	40.311	70.937	56.079	81.41	71.85	101.962	149.88	152	61.979	94.203	79.87		1	1	1	1	1	1	2	2	2	2	2	1		4	2	2	2	2	2
796	wt%														#DIV/0!	0		60.085	40.311	70.937	56.079	81.41	71.85	101.962	149.88	152	61.979	94.203	79.87		1	1	1	1	1	1	2	2	2	2	2	1		4	2	2	2	2	2
797	wt%														#DIV/0!	0		60.085	40.311	70.937	56.079	81.41	71.85	101.962	149.88	152	61.979	94.203	79.87		1	1	1	1	1	1	2	2	2	2	2	1		4	2	2	2	2	2
798	wt%														#DIV/0!	0		60.085	40.311	70.937	56.079	81.41	71.85	101.962	149.88	152	61.979	94.203	79.87		1	1	1	1	1	1	2	2	2	2	2	1		4	2	2	2	2	2
799	wt%														#DIV/0!	0		60.085	40.311	70.937	56.079	81.41	71.85	101.962	149.88	152	61.979	94.203	79.87		1	1	1	1	1	1	2	2	2	2	2	1		4	2	2	2	2	2
800	wt%														#DIV/0!	0		60.085	40.311	70.937	56.079	81.41	71.85	101.962	149.88	152	61.979	94.203	79.87		1	1	1	1	1	1	2	2	2	2	2	1		4	2	2	2	2	2
801	wt%														#DIV/0!	0		60.085	40.311	70.937	56.079	81.41	71.85	101.962	149.88	152	61.979	94.203	79.87		1	1	1	1	1	1	2	2	2	2	2	1		4	2	2	2	2	2
802	wt%														#DIV/0!	0		60.085	40.311	70.937	56.079	81.41	71.85	101.962	149.88	152	61.979	94.203	79.87		1	1	1	1	1	1	2	2	2	2	2	1		4	2	2	2	2	2
803	wt%														#DIV/0!	0		60.085	40.311	70.937	56.079	81.41	71.85	101.962	149.88	152	61.979	94.203	79.87		1	1	1	1	1	1	2	2	2	2	2	1		4	2	2	2	2	2
804	wt%														#DIV/0!	0		60.085	40.311	70.937	56.079	81.41	71.85	101.962	149.88	152	61.979	94.203	79.87		1	1	1	1	1	1	2	2	2	2	2	1		4	2	2	2	2	2
805	wt%														#DIV/0!	0		60.085	40.311	70.937	56.079	81.41	71.85	101.962	149.88	152	61.979	94.203	79.87		1	1	1	1	1	1	2	2	2	2	2	1		4	2	2	2	2	2
806	wt%														#DIV/0!	0		60.085	40.311	70.937	56.079	81.41	71.85	101.962	149.88	152	61.979	94.203	79.87		1	1	1	1	1	1	2	2	2	2	2	1		4	2	2	2	2	2
807	wt%														#DIV/0!	0		60.085	40.311	70.937	56.079	81.41	71.85	101.962	149.88	152	61.979	94.203	79.87		1	1	1	1	1	1	2	2	2	2	2	1		4	2	2	2	2	2
808	wt%														#DIV/0!	0		60.085	40.311	70.937	56.079	81.41	71.85	101.962	149.88	152	61.979	94.203	79.87		1	1	1	1	1	1	2	2	2	2	2	1		4	2	2	2	2	2
809	wt%														#DIV/0!	0		60.085	40.311	70.937	56.079	81.41	71.85	101.962	149.88	152	61.979	94.203	79.87		1	1	1	1	1	1	2	2	2	2	2	1		4	2	2	2	2	2
810	wt%														#DIV/0!	0		60.085	40.311	70.937	56.079	81.41	71.85	101.962	149.88	152	61.979	94.203	79.87		1	1	1	1	1	1	2	2	2	2	2	1		4	2	2	2	2	2
811	wt%														#DIV/0!	0		60.085	40.311	70.937	56.079	81.41	71.85	101.962	149.88	152	61.979	94.203	79.87		1	1	1	1	1	1	2	2	2	2	2	1		4	2	2	2	2	2
812	wt%														#DIV/0!	0		60.085	40.311	70.937	56.079	81.41	71.85	101.962	149.88	152	61.979	94.203	79.87		1	1	1	1	1	1	2	2	2	2	2	1		4	2	2	2	2	2
813	wt%														#DIV/0!	0		60.085	40.311	70.937	56.079	81.41	71.85	101.962	149.88	152	61.979	94.203	79.87		1	1	1	1	1	1	2	2	2	2	2	1		4	2	2	2	2	2
814	wt%														#DIV/0!	0		60.085	40.311	70.937	56.079	81.41	71.85	101.962	149.88	152	61.979	94.203	79.87		1	1	1	1	1	1	2	2	2	2	2	1		4	2	2	2	2	2
815	wt%														#DIV/0!	0		60.085	40.311	70.937	56.079	81.41	71.85	101.962	149.88	152	61.979	94.203	79.87		1	1	1	1	1	1	2	2	2	2	2	1		4	2	2	2	2	2
816	wt%														#DIV/0!	0		60.085	40.311	70.937	56.079	81.41	71.85	101.962	149.88	152	61.979	94.203	79.87		1	1	1	1	1	1	2	2	2	2	2	1		4	2	2	2	2	2
817	wt%														#DIV/0!	0		60.085	40.311	70.937	56.079	81.41	71.85	101.962	149.88	152	61.979	94.203	79.87		1	1	1	1	1	1	2	2	2	2	2	1		4	2	2	2	2	2
818	wt%														#DIV/0!	0		60.085	40.311	70.937	56.079	81.41	71.85	101.962	149.88	152	61.979	94.203	79.87		1	1	1	1	1	1	2	2	2	2	2	1		4	2	2	2	2	2
819	wt%														#DIV/0!	0		60.085	40.311	70.937	56.079	81.41	71.85	101.962	149.88	152	61.979	94.203	79.87		1	1	1	1	1	1	2	2	2	2	2	1		4	2	2	2	2	2
820	wt%														#DIV/0!	0		60.085	40.311	70.937	56.079	81.41	71.85	101.962	149.88	152	61.979	94.203	79.87		1	1	1	1	1	1	2	2	2	2	2	1		4	2	2	2	2	2
821	wt%														#DIV/0!	0		60.085	40.311	70.937	56.079	81.41	71.85	101.962	149.88	152	61.979	94.203	79.87		1	1	1	1	1	1	2	2	2	2	2	1		4	2	2	2	2	2
822	wt%														#DIV/0!	0		60.085	40.311	70.937	56.079	81.41	71.85	101.962	149.88	152	61.979	94.203	79.87		1	1	1	1	1	1	2	2	2	2	2	1		4	2	2	2	2	2
823	wt%														#DIV/0!	0		60.085	40.311	70.937	56.079	81.41	71.85	101.962	149.88	152	61.979	94.203	79.87		1	1	1	1	1	1	2	2	2	2	2	1		4	2	2	2	2	2
824	wt%														#DIV/0!	0		60.085	40.311	70.937	56.079	81.41	71.85	101.962	149.88	152	61.979	94.203	79.87		1	1	1	1	1	1	2	2	2	2	2	1		4	2	2	2	2	2
825	wt%														#DIV/0!	0		60.085	40.311	70.937	56.079	81.41	71.85	101.962	149.88	152	61.979	94.203	79.87		1	1	1	1	1	1	2	2	2	2	2	1		4	2	2	2	2	2
826	wt%														#DIV/0!	0		60.085	40.311	70.937	56.079	81.41	71.85	101.962	149.88	152	61.979	94.203	79.87		1	1	1	1	1	1	2	2	2	2	2	1		4	2	2	2	2	2
827	wt%														#DIV/0!	0		60.085	40.311	70.937	56.079	81.41	71.85	101.962	149.88	152	61.979	94.203	79.87		1	1	1	1	1	1	2	2	2	2	2	1		4	2	2	2	2	2
828	wt%														#DIV/0!	0		60.085	40.311	70.937	56.079	81.41	71.85	101.962	149.88	152	61.979	94.203	79.87		1	1	1	1	1	1	2	2	2	2	2	1		4	2	2	2	2	2
829	wt%														#DIV/0!	0		60.085	40.311	70.937	56.079	81.41	71.85	101.962	149.88	152	61.979	94.203	79.87		1	1	1	1	1	1	2	2	2	2	2	1		4	2	2	2	2	2
830	wt%														#DIV/0!	0		60.085	40.311	70.937	56.079	81.41	71.85	101.962	149.88	152	61.979	94.203	79.87		1	1	1	1	1	1	2	2	2	2	2	1		4	2	2	2	2	2
831	wt%														#DIV/0!	0		60.085	40.311	70.937	56.079	81.41	71.85	101.962	149.88	152	61.979	94.203	79.87		1	1	1	1	1	1	2	2	2	2	2	1		4	2	2	2	2	2
832	wt%														#DIV/0!	0		60.085	40.311	70.937	56.079	81.41	71.85	101.962	149.88	152	61.979	94.203	79.87		1	1	1	1	1	1	2	2	2	2	2	1		4	2	2	2	2	2
833	wt%														#DIV/0!	0		60.085	40.311	70.937	56.079	81.41	71.85	101.962	149.88	152	61.979	94.203	79.87		1	1	1	1	1	1	2	2	2	2	2	1		4	2	2	2	2	2
834	wt%														#DIV/0!	0		60.085	40.311	70.937	56.079	81.41	71.85	101.962	149.88	152	61.979	94.203	79.87		1	1	1	1	1	1	2	2	2	2	2	1		4	2	2	2	2	2
835	wt%														#DIV/0!	0		60.085	40.311	70.937	56.079	81.41	71.85	101.962	149.88	152	61.979	94.203	79.87		1	1	1	1	1	1	2	2	2	2	2	1		4	2	2	2	2	2
836	wt%														#DIV/0!	0		60.085	40.311	70.937	56.079	81.41	71.85	101.962	149.88	152	61.979	94.203	79.87		1	1	1	1	1	1	2	2	2	2	2	1		4	2	2	2	2	2
837	wt%														#DIV/0!	0		60.085	40.311	70.937	56.079	81.41	71.85	101.962	149.88	152	61.979	94.203	79.87		1	1	1	1	1	1	2	2	2	2	2	1		4	2	2	2	2	2
838	wt%														#DIV/0!	0		60.085	40.311	70.937	56.079	81.41	71.85	101.962	149.88	152	61.979	94.203	79.87		1	1	1	1	1	1	2	2	2	2	2	1		4	2	2	2	2	2
839	wt%														#DIV/0!	0		60.085	40.311	70.937	56.079	81.41	71.85	101.962	149.88	152	61.979	94.203	79.87		1	1	1	1	1	1	2	2	2	2	2	1		4	2	2	2	2	2
840	wt%														#DIV/0!	0		60.085	40.311	70.937	56.079	81.41	71.85	101.962	149.88	152	61.979	94.203	79.87		1	1	1	1	1	1	2	2	2	2	2	1		4	2	2	2	2	2
841	wt%														#DIV/0!	0		60.085	40.311	70.937	56.079	81.41	71.85	101.962	149.88	152	61.979	94.203	79.87		1	1	1	1	1	1	2	2	2	2	2	1		4	2	2	2	2	2
842	wt%														#DIV/0!	0		60.085	40.311	70.937	56.079	81.41	71.85	101.962	149.88	152	61.979	94.203	79.87		1	1	1	1	1	1	2	2	2	2	2	1		4	2	2	2	2	2
843	wt%														#DIV/0!	0		60.085	40.311	70.937	56.079	81.41	71.85	101.962	149.88	152	61.979	94.203	79.87		1	1	1	1	1	1	2	2	2	2	2	1		4	2	2	2	2	2
844	wt%														#DIV/0!	0		60.085	40.311	70.937	56.079	81.41	71.85	101.962	149.88	152	61.979	94.203	79.87		1	1	1	1	1	1	2	2	2	2	2	1		4	2	2	2	2	2
845	wt%														#DIV/0!	0		60.085	40.311	70.937	56.079	81.41	71.85	101.962	149.88	152	61.979	94.203	79.87		1	1	1	1	1	1	2	2	2	2	2	1		4	2	2	2	2	2
846	wt%														#DIV/0!	0		60.085	40.311	70.937	56.079	81.41	71.85	101.962	149.88	152	61.979	94.203	79.87		1	1	1	1	1	1	2	2	2	2	2	1		4	2	2	2	2	2
847	wt%														#DIV/0!	0		60.085	40.311	70.937	56.079	81.41	71.85	101.962	149.88	152	61.979	94.203	79.87		1	1	1	1	1	1	2	2	2	2	2	1		4	2	2	2	2	2
848	wt%														#DIV/0!	0		60.085	40.311	70.937	56.079	81.41	71.85	101.962	149.88	152	61.979	94.203	79.87		1	1	1	1	1	1	2	2	2	2	2	1		4	2	2	2	2	2
849	wt%														#DIV/0!	0		60.085	40.311	70.937	56.079	81.41	71.85	101.962	149.88	152	61.979	94.203	79.87		1	1	1	1	1	1	2	2	2	2	2	1		4	2	2	2	2	2
850	wt%														#DIV/0!	0		60.085	40.311	70.937	56.079	81.41	71.85	101.962	149.88	152	61.979	94.203	79.87		1	1	1	1	1	1	2	2	2	2	2	1		4	2	2	2	2	2
851	wt%														#DIV/0!	0		60.085	40.311	70.937	56.079	81.41	71.85	101.962	149.88	152	61.979	94.203	79.87		1	1	1	1	1	1	2	2	2	2	2	1		4	2	2	2	2	2
852	wt%														#DIV/0!	0		60.085	40.311	70.937	56.079	81.41	71.85	101.962	149.88	152	61.979	94.203	79.87		1	1	1	1	1	1	2	2	2	2	2	1		4	2	2	2	2	2
853	wt%														#DIV/0!	0		60.085	40.311	70.937	56.079	81.41	71.85	101.962	149.88	152	61.979	94.203	79.87		1	1	1	1	1	1	2	2	2	2	2	1		4	2	2	2	2	2
854	wt%														#DIV/0!	0		60.085	40.311	70.937	56.079	81.41	71.85	101.962	149.88	152	61.979	94.203	79.87		1	1	1	1	1	1	2	2	2	2	2	1		4	2	2	2	2	2
855	wt%														#DIV/0!	0		60.085	40.311	70.937	56.079	81.41	71.85	101.962	149.88	152	61.979	94.203	79.87		1	1	1	1	1	1	2	2	2	2	2	1		4	2	2	2	2	2
856	wt%														#DIV/0!	0		60.085	40.311	70.937	56.079	81.41	71.85	101.962	149.88	152	61.979	94.203	79.87		1	1	1	1	1	1	2	2	2	2	2	1		4	2	2	2	2	2
857	wt%														#DIV/0!	0		60.085	40.311	70.937	56.079	81.41	71.85	101.962	149.88	152	61.979	94.203	79.87		1	1	1	1	1	1	2	2	2	2	2	1		4	2	2	2	2	2
858	wt%														#DIV/0!	0		60.085	40.311	70.937	56.079	81.41	71.85	101.962	149.88	152	61.979	94.203	79.87		1	1	1	1	1	1	2	2	2	2	2	1		4	2	2	2	2	2
859	wt%														#DIV/0!	0		60.085	40.311	70.937	56.079	81.41	71.85	101.962	149.88	152	61.979	94.203	79.87		1	1	1	1	1	1	2	2	2	2	2	1		4	2	2	2	2	2
860	wt%														#DIV/0!	0		60.085	40.311	70.937	56.079	81.41	71.85	101.962	149.88	152	61.979	94.203	79.87		1	1	1	1	1	1	2	2	2	2	2	1		4	2	2	2	2	2
861	wt%														#DIV/0!	0		60.085	40.311	70.937	56.079	81.41	71.85	101.962	149.88	152	61.979	94.203	79.87		1	1	1	1	1	1	2	2	2	2	2	1		4	2	2	2	2	2
862	wt%														#DIV/0!	0		60.085	40.311	70.937	56.079	81.41	71.85	101.962	149.88	152	61.979	94.203	79.87		1	1	1	1	1	1	2	2	2	2	2	1		4	2	2	2	2	2
863	wt%														#DIV/0!	0		60.085	40.311	70.937	56.079	81.41	71.85	101.962	149.88	152	61.979	94.203	79.87		1	1	1	1	1	1	2	2	2	2	2	1		4	2	2	2	2	2
864	wt%														#DIV/0!	0		60.085	40.311	70.937	56.079	81.41	71.85	101.962	149.88	152	61.979	94.203	79.87		1	1	1	1	1	1	2	2	2	2	2	1		4	2	2	2	2	2
865	wt%														#DIV/0!	0		60.085	40.311	70.937	56.079	81.41	71.85	101.962	149.88	152	61.979	94.203	79.87		1	1	1	1	1	1	2	2	2	2	2	1		4	2	2	2	2	2
866	wt%														#DIV/0!	0		60.085	40.311	70.937	56.079	81.41	71.85	101.962	149.88	152	61.979	94.203	79.87		1	1	1	1	1	1	2	2	2	2	2	1		4	2	2	2	2	2
867	wt%														#DIV/0!	0		60.085	40.311	70.937	56.079	81.41	71.85	101.962	149.88	152	61.979	94.203	79.87		1	1	1	1	1	1	2	2	2	2	2	1		4	2	2	2	2	2
868	wt%														#DIV/0!	0		60.085	40.311	70.937	56.079	81.41	71.85	101.962	149.88	152	61.979	94.203	79.87		1	1	1	1	1	1	2	2	2	2	2	1		4	2	2	2	2	2
869	wt%														#DIV/0!	0		60.085	40.311	70.937	56.079	81.41	71.85	101.962	149.88	152	61.979	94.203	79.87		1	1	1	1	1	1	2	2	2	2	2	1		4	2	2	2	2	2
870	wt%														#DIV/0!	0		60.085	40.311	70.937	56.079	81.41	71.85	101.962	149.88	152	61.979	94.203	79.87		1	1	1	1	1	1	2	2	2	2	2	1		4	2	2	2	2	2
871	wt%														#DIV/0!	0		60.085	40.311	70.937	56.079	81.41	71.85	101.962	149.88	152	61.979	94.203	79.87		1	1	1	1	1	1	2	2	2	2	2	1		4	2	2	2	2	2
872	wt%														#DIV/0!	0		60.085	40.311	70.937	56.079	81.41	71.85	101.962	149.88	152	61.979	94.203	79.87		1	1	1	1	1	1	2	2	2	2	2	1		4	2	2	2	2	2
873	wt%														#DIV/0!	0		60.085	40.311	70.937	56.079	81.41	71.85	101.962	149.88	152	61.979	94.203	79.87		1	1	1	1	1	1	2	2	2	2	2	1		4	2	2	2	2	2
874	wt%														#DIV/0!	0		60.085	40.311	70.937	56.079	81.41	71.85	101.962	149.88	152	61.979	94.203	79.87		1	1	1	1	1	1	2	2	2	2	2	1		4	2	2	2	2	2
875	wt%														#DIV/0!	0		60.085	40.311	70.937	56.079	81.41	71.85	101.962	149.88	152	61.979	94.203	79.87		1	1	1	1	1	1	2	2	2	2	2	1		4	2	2	2	2	2
876	wt%														#DIV/0!	0		60.085	40.311	70.937	56.079	81.41	71.85	101.962	149.88	152	61.979	94.203	79.87		1	1	1	1	1	1	2	2	2	2	2	1		4	2	2	2	2	2
877	wt%														#DIV/0!	0		60.085	40.311	70.937	56.079	81.41	71.85	101.962	149.88	152	61.979	94.203	79.87		1	1	1	1	1	1	2	2	2	2	2	1		4	2	2	2	2	2
878	wt%														#DIV/0!	0		60.085	40.311	70.937	56.079	81.41	71.85	101.962	149.88	152	61.979	94.203	79.87		1	1	1	1	1	1	2	2	2	2	2	1		4	2	2	2	2	2
879	wt%														#DIV/0!	0		60.085	40.311	70.937	56.079	81.41	71.85	101.962	149.88	152	61.979	94.203	79.87		1	1	1	1	1	1	2	2	2	2	2	1		4	2	2	2	2	2
880	wt%														#DIV/0!	0		60.085	40.311	70.937	56.079	81.41	71.85	101.962	149.88	152	61.979	94.203	79.87		1	1	1	1	1	1	2	2	2	2	2	1		4	2	2	2	2	2
881	wt%														#DIV/0!	0		60.085	40.311	70.937	56.079	81.41	71.85	101.962	149.88	152	61.979	94.203	79.87		1	1	1	1	1	1	2	2	2	2	2	1		4	2	2	2	2	2
882	wt%														#DIV/0!	0		60.085	40.311	70.937	56.079	81.41	71.85	101.962	149.88	152	61.979	94.203	79.87		1	1	1	1	1	1	2	2	2	2	2	1		4	2	2	2	2	2
883	wt%														#DIV/0!	0		60.085	40.311	70.937	56.079	81.41	71.85	101.962	149.88	152	61.979	94.203	79.87		1	1	1	1	1	1	2	2	2	2	2	1		4	2	2	2	2	2
884	wt%														#DIV/0!	0		60.085	40.311	70.937	56.079	81.41	71.85	101.962	149.88	152	61.979	94.203	79.87		1	1	1	1	1	1	2	2	2	2	2	1		4	2	2	2	2	2
885	wt%														#DIV/0!	0		60.085	40.311	70.937	56.079	81.41	71.85	101.962	149.88	152	61.979	94.203	79.87		1	1	1	1	1	1	2	2	2	2	2	1		4	2	2	2	2	2
886	wt%														#DIV/0!	0		60.085	40.311	70.937	56.079	81.41	71.85	101.962	149.88	152	61.979	94.203	79.87		1	1	1	1	1	1	2	2	2	2	2	1		4	2	2	2	2	2
887	wt%														#DIV/0!	0		60.085	40.311	70.937	56.079	81.41	71.85	101.962	149.88	152	61.979	94.203	79.87		1	1	1	1	1	1	2	2	2	2	2	1		4	2	2	2	2	2
888	wt%														#DIV/0!	0		60.085	40.311	70.937	56.079	81.41	71.85	101.962	149.88	152	61.979	94.203	79.87		1	1	1	1	1	1	2	2	2	2	2	1		4	2	2	2	2	2
889	wt%														#DIV/0!	0		60.085	40.311	70.937	56.079	81.41	71.85	101.962	149.88	152	61.979	94.203	79.87		1	1	1	1	1	1	2	2	2	2	2	1		4	2	2	2	2	2
890	wt%														#DIV/0!	0		60.085	40.311	70.937	56.079	81.41	71.85	101.962	149.88	152	61.979	94.203	79.87		1	1	1	1	1	1	2	2	2	2	2	1		4	2	2	2	2	2
891	wt%														#DIV/0!	0		60.085	40.311	70.937	56.079	81.41	71.85	101.962	149.88	152	61.979	94.203	79.87		1	1	1	1	1	1	2	2	2	2	2	1		4	2	2	2	2	2
892	wt%														#DIV/0!	0		60.085	40.311	70.937	56.079	81.41	71.85	101.962	149.88	152	61.979	94.203	79.87		1	1	1	1	1	1	2	2	2	2	2	1		4	2	2	2	2	2
893	wt%														#DIV/0!	0		60.085	40.311	70.937	56.079	81.41	71.85	101.962	149.88	152	61.979	94.203	79.87		1	1	1	1	1	1	2	2	2	2	2	1		4	2	2	2	2	2
894	wt%														#DIV/0!	0		60.085	40.311	70.937	56.079	81.41	71.85	101.962	149.88	152	61.979	94.203	79.87		1	1	1	1	1	1	2	2	2	2	2	1		4	2	2	2	2	2
895	wt%														#DIV/0!	0		60.085	40.311	70.937	56.079	81.41	71.85	101.962	149.88	152	61.979	94.203	79.87		1	1	1	1	1	1	2	2	2	2	2	1		4	2	2	2	2	2
896	wt%														#DIV/0!	0		60.085	40.311	70.937	56.079	81.41	71.85	101.962	149.88	152	61.979	94.203	79.87		1	1	1	1	1	1	2	2	2	2	2	1		4	2	2	2	2	2
897	wt%														#DIV/0!	0		60.085	40.311	70.937	56.079	81.41	71.85	101.962	149.88	152	61.979	94.203	79.87		1	1	1	1	1	1	2	2	2	2	2	1		4	2	2	2	2	2
898	wt%														#DIV/0!	0		60.085	40.311	70.937	56.079	81.41	71.85	101.962	149.88	152	61.979	94.203	79.87		1	1	1	1	1	1	2	2	2	2	2	1		4	2	2	2	2	2
899	wt%														#DIV/0!	0		60.085	40.311	70.937	56.079	81.41	71.85	101.962	149.88	152	61.979	94.203	79.87		1	1	1	1	1	1	2	2	2	2	2	1		4	2	2	2	2	2
900	wt%														#DIV/0!	0		60.085	40.311	70.937	56.079	81.41	71.85	101.962	149.88	152	61.979	94.203	79.87		1	1	1	1	1	1	2	2	2	2	2	1		4	2	2	2	2	2
901	wt%														#DIV/0!	0		60.085	40.311	70.937	56.079	81.41	71.85	101.962	149.88	152	61.979	94.203	79.87		1	1	1	1	1	1	2	2	2	2	2	1		4	2	2	2	2	2
902	wt%														#DIV/0!	0		60.085	40.311	70.937	56.079	81.41	71.85	101.962	149.88	152	61.979	94.203	79.87		1	1	1	1	1	1	2	2	2	2	2	1		4	2	2	2	2	2
903	wt%														#DIV/0!	0		60.085	40.311	70.937	56.079	81.41	71.85	101.962	149.88	152	61.979	94.203	79.87		1	1	1	1	1	1	2	2	2	2	2	1		4	2	2	2	2	2
904	wt%														#DIV/0!	0		60.085	40.311	70.937	56.079	81.41	71.85	101.962	149.88	152	61.979	94.203	79.87		1	1	1	1	1	1	2	2	2	2	2	1		4	2	2	2	2	2
905	wt%														#DIV/0!	0		60.085	40.311	70.937	56.079	81.41	71.85	101.962	149.88	152	61.979	94.203	79.87		1	1	1	1	1	1	2	2	2	2	2	1		4	2	2	2	2	2
906	wt%														#DIV/0!	0		60.085	40.311	70.937	56.079	81.41	71.85	101.962	149.88	152	61.979	94.203	79.87		1	1	1	1	1	1	2	2	2	2	2	1		4	2	2	2	2	2
907	wt%														#DIV/0!	0		60.085	40.311	70.937	56.079	81.41	71.85	101.962	149.88	152	61.979	94.203	79.87		1	1	1	1	1	1	2	2	2	2	2	1		4	2	2	2	2	2
908	wt%														#DIV/0!	0		60.085	40.311	70.937	56.079	81.41	71.85	101.962	149.88	152	61.979	94.203	79.87		1	1	1	1	1	1	2	2	2	2	2	1		4	2	2	2	2	2
909	wt%														#DIV/0!	0		60.085	40.311	70.937	56.079	81.41	71.85	101.962	149.88	152	61.979	94.203	79.87		1	1	1	1	1	1	2	2	2	2	2	1		4	2	2	2	2	2
910	wt%														#DIV/0!	0		60.085	40.311	70.937	56.079	81.41	71.85	101.962	149.88	152	61.979	94.203	79.87		1	1	1	1	1	1	2	2	2	2	2	1		4	2	2	2	2	2
911	wt%														#DIV/0!	0		60.085	40.311	70.937	56.079	81.41	71.85	101.962	149.88	152	61.979	94.203	79.87		1	1	1	1	1	1	2	2	2	2	2	1		4	2	2	2	2	2
912	wt%														#DIV/0!	0		60.085	40.311	70.937	56.079	81.41	71.85	101.962	149.88	152	61.979	94.203	79.87		1	1	1	1	1	1	2	2	2	2	2	1		4	2	2	2	2	2
913	wt%														#DIV/0!	0		60.085	40.311	70.937	56.079	81.41	71.85	101.962	149.88	152	61.979	94.203	79.87		1	1	1	1	1	1	2	2	2	2	2	1		4	2	2	2	2	2
914	wt%														#DIV/0!	0		60.085	40.311	70.937	56.079	81.41	71.85	101.962	149.88	152	61.979	94.203	79.87		1	1	1	1	1	1	2	2	2	2	2	1		4	2	2	2	2	2
915	wt%														#DIV/0!	0		60.085	40.311	70.937	56.079	81.41	71.85	101.962	149.88	152	61.979	94.203	79.87		1	1	1	1	1	1	2	2	2	2	2	1		4	2	2	2	2	2
916	wt%														#DIV/0!	0		60.085	40.311	70.937	56.079	81.41	71.85	101.962	149.88	152	61.979	94.203	79.87		1	1	1	1	1	1	2	2	2	2	2	1		4	2	2	2	2	2
917	wt%														#DIV/0!	0		60.085	40.311	70.937	56.079	81.41	71.85	101.962	149.88	152	61.979	94.203	79.87		1	1	1	1	1	1	2	2	2	2	2	1		4	2	2	2	2	2
918	wt%														#DIV/0!	0		60.085	40.311	70.937	56.079	81.41	71.85	101.962	149.88	152	61.979	94.203	79.87		1	1	1	1	1	1	2	2	2	2	2	1		4	2	2	2	2	2
919	wt%														#DIV/0!	0		60.085	40.311	70.937	56.079	81.41	71.85	101.962	149.88	152	61.979	94.203	79.87		1	1	1	1	1	1	2	2	2	2	2	1		4	2	2	2	2	2
920	wt%														#DIV/0!	0		60.085	40.311	70.937	56.079	81.41	71.85	101.962	149.88	152	61.979	94.203	79.87		1	1	1	1	1	1	2	2	2	2	2	1		4	2	2	2	2	2
921	wt%														#DIV/0!	0		60.085	40.311	70.937	56.079	81.41	71.85	101.962	149.88	152	61.979	94.203	79.87		1	1	1	1	1	1	2	2	2	2	2	1		4	2	2	2	2	2
922	wt%														#DIV/0!	0		60.085	40.311	70.937	56.079	81.41	71.85	101.962	149.88	152	61.979	94.203	79.87		1	1	1	1	1	1	2	2	2	2	2	1		4	2	2	2	2	2
923	wt%														#DIV/0!	0		60.085	40.311	70.937	56.079	81.41	71.85	101.962	149.88	152	61.979	94.203	79.87		1	1	1	1	1	1	2	2	2	2	2	1		4	2	2	2	2	2
924	wt%														#DIV/0!	0		60.085	40.311	70.937	56.079	81.41	71.85	101.962	149.88	152	61.979	94.203	79.87		1	1	1	1	1	1	2	2	2	2	2	1		4	2	2	2	2	2
925	wt%														#DIV/0!	0		60.085	40.311	70.937	56.079	81.41	71.85	101.962	149.88	152	61.979	94.203	79.87		1	1	1	1	1	1	2	2	2	2	2	1		4	2	2	2	2	2
926	wt%														#DIV/0!	0		60.085	40.311	70.937	56.079	81.41	71.85	101.962	149.88	152	61.979	94.203	79.87		1	1	1	1	1	1	2	2	2	2	2	1		4	2	2	2	2	2
927	wt%														#DIV/0!	0		60.085	40.311	70.937	56.079	81.41	71.85	101.962	149.88	152	61.979	94.203	79.87		1	1	1	1	1	1	2	2	2	2	2	1		4	2	2	2	2	2
928	wt%														#DIV/0!	0		60.085	40.311	70.937	56.079	81.41	71.85	101.962	149.88	152	61.979	94.203	79.87		1	1	1	1	1	1	2	2	2	2	2	1		4	2	2	2	2	2
929	wt%														#DIV/0!	0		60.085	40.311	70.937	56.079	81.41	71.85	101.962	149.88	152	61.979	94.203	79.87		1	1	1	1	1	1	2	2	2	2	2	1		4	2	2	2	2	2
930	wt%														#DIV/0!	0		60.085	40.311	70.937	56.079	81.41	71.85	101.962	149.88	152	61.979	94.203	79.87		1	1	1	1	1	1	2	2	2	2	2	1		4	2	2	2	2	2
931	wt%														#DIV/0!	0		60.085	40.311	70.937	56.079	81.41	71.85	101.962	149.88	152	61.979	94.203	79.87		1	1	1	1	1	1	2	2	2	2	2	1		4	2	2	2	2	2
932	wt%														#DIV/0!	0		60.085	40.311	70.937	56.079	81.41	71.85	101.962	149.88	152	61.979	94.203	79.87		1	1	1	1	1	1	2	2	2	2	2	1		4	2	2	2	2	2
933	wt%														#DIV/0!	0		60.085	40.311	70.937	56.079	81.41	71.85	101.962	149.88	152	61.979	94.203	79.87		1	1	1	1	1	1	2	2	2	2	2	1		4	2	2	2	2	2
934	wt%														#DIV/0!	0		60.085	40.311	70.937	56.079	81.41	71.85	101.962	149.88	152	61.979	94.203	79.87		1	1	1	1	1	1	2	2	2	2	2	1		4	2	2	2	2	2
935	wt%														#DIV/0!	0		60.085	40.311	70.937	56.079	81.41	71.85	101.962	149.88	152	61.979	94.203	79.87		1	1	1	1	1	1	2	2	2	2	2	1		4	2	2	2	2	2
936	wt%														#DIV/0!	0		60.085	40.311	70.937	56.079	81.41	71.85	101.962	149.88	152	61.979	94.203	79.87		1	1	1	1	1	1	2	2	2	2	2	1		4	2	2	2	2	2
937	wt%														#DIV/0!	0		60.085	40.311	70.937	56.079	81.41	71.85	101.962	149.88	152	61.979	94.203	79.87		1	1	1	1	1	1	2	2	2	2	2	1		4	2	2	2	2	2
938	wt%														#DIV/0!	0		60.085	40.311	70.937	56.079	81.41	71.85	101.962	149.88	152	61.979	94.203	79.87		1	1	1	1	1	1	2	2	2	2	2	1		4	2	2	2	2	2
939	wt%														#DIV/0!	0		60.085	40.311	70.937	56.079	81.41	71.85	101.962	149.88	152	61.979	94.203	79.87		1	1	1	1	1	1	2	2	2	2	2	1		4	2	2	2	2	2
940	wt%														#DIV/0!	0		60.085	40.311	70.937	56.079	81.41	71.85	101.962	149.88	152	61.979	94.203	79.87		1	1	1	1	1	1	2	2	2	2	2	1		4	2	2	2	2	2
941	wt%														#DIV/0!	0		60.085	40.311	70.937	56.079	81.41	71.85	101.962	149.88	152	61.979	94.203	79.87		1	1	1	1	1	1	2	2	2	2	2	1		4	2	2	2	2	2
942	wt%														#DIV/0!	0		60.085	40.311	70.937	56.079	81.41	71.85	101.962	149.88	152	61.979	94.203	79.87		1	1	1	1	1	1	2	2	2	2	2	1		4	2	2	2	2	2
943	wt%														#DIV/0!	0		60.085	40.311	70.937	56.079	81.41	71.85	101.962	149.88	152	61.979	94.203	79.87		1	1	1	1	1	1	2	2	2	2	2	1		4	2	2	2	2	2
944	wt%														#DIV/0!	0		60.085	40.311	70.937	56.079	81.41	71.85	101.962	149.88	152	61.979	94.203	79.87		1	1	1	1	1	1	2	2	2	2	2	1		4	2	2	2	2	2
945	wt%														#DIV/0!	0		60.085	40.311	70.937	56.079	81.41	71.85	101.962	149.88	152	61.979	94.203	79.87		1	1	1	1	1	1	2	2	2	2	2	1		4	2	2	2	2	2
946	wt%														#DIV/0!	0		60.085	40.311	70.937	56.079	81.41	71.85	101.962	149.88	152	61.979	94.203	79.87		1	1	1	1	1	1	2	2	2	2	2	1		4	2	2	2	2	2
947	wt%														#DIV/0!	0		60.085	40.311	70.937	56.079	81.41	71.85	101.962	149.88	152	61.979	94.203	79.87		1	1	1	1	1	1	2	2	2	2	2	1		4	2	2	2	2	2
948	wt%														#DIV/0!	0		60.085	40.311	70.937	56.079	81.41	71.85	101.962	149.88	152	61.979	94.203	79.87		1	1	1	1	1	1	2	2	2	2	2	1		4	2	2	2	2	2
949	wt%														#DIV/0!	0		60.085	40.311	70.937	56.079	81.41	71.85	101.962	149.88	152	61.979	94.203	79.87		1	1	1	1	1	1	2	2	2	2	2	1		4	2	2	2	2	2
950	wt%														#DIV/0!	0		60.085	40.311	70.937	56.079	81.41	71.85	101.962	149.88	152	61.979	94.203	79.87		1	1	1	1	1	1	2	2	2	2	2	1		4	2	2	2	2	2
951	wt%														#DIV/0!	0		60.085	40.311	70.937	56.079	81.41	71.85	101.962	149.88	152	61.979	94.203	79.87		1	1	1	1	1	1	2	2	2	2	2	1		4	2	2	2	2	2
952	wt%														#DIV/0!	0		60.085	40.311	70.937	56.079	81.41	71.85	101.962	149.88	152	61.979	94.203	79.87		1	1	1	1	1	1	2	2	2	2	2	1		4	2	2	2	2	2
953	wt%														#DIV/0!	0		60.085	40.311	70.937	56.079	81.41	71.85	101.962	149.88	152	61.979	94.203	79.87		1	1	1	1	1	1	2	2	2	2	2	1		4	2	2	2	2	2
954	wt%														#DIV/0!	0		60.085	40.311	70.937	56.079	81.41	71.85	101.962	149.88	152	61.979	94.203	79.87		1	1	1	1	1	1	2	2	2	2	2	1		4	2	2	2	2	2
955	wt%														#DIV/0!	0		60.085	40.311	70.937	56.079	81.41	71.85	101.962	149.88	152	61.979	94.203	79.87		1	1	1	1	1	1	2	2	2	2	2	1		4	2	2	2	2	2
956	wt%														#DIV/0!	0		60.085	40.311	70.937	56.079	81.41	71.85	101.962	149.88	152	61.979	94.203	79.87		1	1	1	1	1	1	2	2	2	2	2	1		4	2	2	2	2	2
957	wt%														#DIV/0!	0		60.085	40.311	70.937	56.079	81.41	71.85	101.962	149.88	152	61.979	94.203	79.87		1	1	1	1	1	1	2	2	2	2	2	1		4	2	2	2	2	2
958	wt%														#DIV/0!	0		60.085	40.311	70.937	56.079	81.41	71.85	101.962	149.88	152	61.979	94.203	79.87		1	1	1	1	1	1	2	2	2	2	2	1		4	2	2	2	2	2
959	wt%														#DIV/0!	0		60.085	40.311	70.937	56.079	81.41	71.85	101.962	149.88	152	61.979	94.203	79.87		1	1	1	1	1	1	2	2	2	2	2	1		4	2	2	2	2	2
960	wt%														#DIV/0!	0		60.085	40.311	70.937	56.079	81.41	71.85	101.962	149.88	152	61.979	94.203	79.87		1	1	1	1	1	1	2	2	2	2	2	1		4	2	2	2	2	2
961	wt%														#DIV/0!	0		60.085	40.311	70.937	56.079	81.41	71.85	101.962	149.88	152	61.979	94.203	79.87		1	1	1	1	1	1	2	2	2	2	2	1		4	2	2	2	2	2
962	wt%														#DIV/0!	0		60.085	40.311	70.937	56.079	81.41	71.85	101.962	149.88	152	61.979	94.203	79.87		1	1	1	1	1	1	2	2	2	2	2	1		4	2	2	2	2	2
963	wt%														#DIV/0!	0		60.085	40.311	70.937	56.079	81.41	71.85	101.962	149.88	152	61.979	94.203	79.87		1	1	1	1	1	1	2	2	2	2	2	1		4	2	2	2	2	2
964	wt%														#DIV/0!	0		60.085	40.311	70.937	56.079	81.41	71.85	101.962	149.88	152	61.979	94.203	79.87		1	1	1	1	1	1	2	2	2	2	2	1		4	2	2	2	2	2
965	wt%														#DIV/0!	0		60.085	40.311	70.937	56.079	81.41	71.85	101.962	149.88	152	61.979	94.203	79.87		1	1	1	1	1	1	2	2	2	2	2	1		4	2	2	2	2	2
966	wt%														#DIV/0!	0		60.085	40.311	70.937	56.079	81.41	71.85	101.962	149.88	152	61.979	94.203	79.87		1	1	1	1	1	1	2	2	2	2	2	1		4	2	2	2	2	2
967	wt%														#DIV/0!	0		60.085	40.311	70.937	56.079	81.41	71.85	101.962	149.88	152	61.979	94.203	79.87		1	1	1	1	1	1	2	2	2	2	2	1		4	2	2	2	2	2
968	wt%														#DIV/0!	0		60.085	40.311	70.937	56.079	81.41	71.85	101.962	149.88	152	61.979	94.203	79.87		1	1	1	1	1	1	2	2	2	2	2	1		4	2	2	2	2	2
969	wt%														#DIV/0!	0		60.085	40.311	70.937	56.079	81.41	71.85	101.962	149.88	152	61.979	94.203	79.87		1	1	1	1	1	1	2	2	2	2	2	1		4	2	2	2	2	2
970	wt%														#DIV/0!	0		60.085	40.311	70.937	56.079	81.41	71.85	101.962	149.88	152	61.979	94.203	79.87		1	1	1	1	1	1	2	2	2	2	2	1		4	2	2	2	2	2
971	wt%														#DIV/0!	0		60.085	40.311	70.937	56.079	81.41	71.85	101.962	149.88	152	61.979	94.203	79.87		1	1	1	1	1	1	2	2	2	2	2	1		4	2	2	2	2	2
972	wt%														#DIV/0!	0		60.085	40.311	70.937	56.079	81.41	71.85	101.962	149.88	152	61.979	94.203	79.87		1	1	1	1	1	1	2	2	2	2	2	1		4	2	2	2	2	2
973	wt%														#DIV/0!	0		60.085	40.311	70.937	56.079	81.41	71.85	101.962	149.88	152	61.979	94.203	79.87		1	1	1	1	1	1	2	2	2	2	2	1		4	2	2	2	2	2
974	wt%														#DIV/0!	0		60.085	40.311	70.937	56.079	81.41	71.85	101.962	149.88	152	61.979	94.203	79.87		1	1	1	1	1	1	2	2	2	2	2	1		4	2	2	2	2	2
975	wt%														#DIV/0!	0		60.085	40.311	70.937	56.079	81.41	71.85	101.962	149.88	152	61.979	94.203	79.87		1	1	1	1	1	1	2	2	2	2	2	1		4	2	2	2	2	2
976	wt%														#DIV/0!	0		60.085	40.311	70.937	56.079	81.41	71.85	101.962	149.88	152	61.979	94.203	79.87		1	1	1	1	1	1	2	2	2	2	2	1		4	2	2	2	2	2
977	wt%														#DIV/0!	0		60.085	40.311	70.937	56.079	81.41	71.85	101.962	149.88	152	61.979	94.203	79.87		1	1	1	1	1	1	2	2	2	2	2	1		4	2	2	2	2	2
978	wt%														#DIV/0!	0		60.085	40.311	70.937	56.079	81.41	71.85	101.962	149.88	152	61.979	94.203	79.87		1	1	1	1	1	1	2	2	2	2	2	1		4	2	2	2	2	2
979	wt%														#DIV/0!	0		60.085	40.311	70.937	56.079	81.41	71.85	101.962	149.88	152	61.979	94.203	79.87		1	1	1	1	1	1	2	2	2	2	2	1		4	2	2	2	2	2
980	wt%														#DIV/0!	0		60.085	40.311	70.937	56.079	81.41	71.85	101.962	149.88	152	61.979	94.203	79.87		1	1	1	1	1	1	2	2	2	2	2	1		4	2	2	2	2	2
981	wt%														#DIV/0!	0		60.085	40.311	70.937	56.079	81.41	71.85	101.962	149.88	152	61.979	94.203	79.87		1	1	1	1	1	1	2	2	2	2	2	1		4	2	2	2	2	2
982	wt%														#DIV/0!	0		60.085	40.311	70.937	56.079	81.41	71.85	101.962	149.88	152	61.979	94.203	79.87		1	1	1	1	1	1	2	2	2	2	2	1		4	2	2	2	2	2
983	wt%														#DIV/0!	0		60.085	40.311	70.937	56.079	81.41	71.85	101.962	149.88	152	61.979	94.203	79.87		1	1	1	1	1	1	2	2	2	2	2	1		4	2	2	2	2	2
984	wt%														#DIV/0!	0		60.085	40.311	70.937	56.079	81.41	71.85	101.962	149.88	152	61.979	94.203	79.87		1	1	1	1	1	1	2	2	2	2	2	1		4	2	2	2	2	2
985	wt%														#DIV/0!	0		60.085	40.311	70.937	56.079	81.41	71.85	101.962	149.88	152	61.979	94.203	79.87		1	1	1	1	1	1	2	2	2	2	2	1		4	2	2	2	2	2
986	wt%														#DIV/0!	0		60.085	40.311	70.937	56.079	81.41	71.85	101.962	149.88	152	61.979	94.203	79.87		1	1	1	1	1	1	2	2	2	2	2	1		4	2	2	2	2	2
987	wt%														#DIV/0!	0		60.085	40.311	70.937	56.079	81.41	71.85	101.962	149.88	152	61.979	94.203	79.87		1	1	1	1	1	1	2	2	2	2	2	1		4	2	2	2	2	2
988	wt%														#DIV/0!	0		60.085	40.311	70.937	56.079	81.41	71.85	101.962	149.88	152	61.979	94.203	79.87		1	1	1	1	1	1	2	2	2	2	2	1		4	2	2	2	2	2
989	wt%														#DIV/0!	0		60.085	40.311	70.937	56.079	81.41	71.85	101.962	149.88	152	61.979	94.203	79.87		1	1	1	1	1	1	2	2	2	2	2	1		4	2	2	2	2	2
990	wt%														#DIV/0!	0		60.085	40.311	70.937	56.079	81.41	71.85	101.962	149.88	152	61.979	94.203	79.87		1	1	1	1	1	1	2	2	2	2	2	1		4	2	2	2	2	2
991	wt%														#DIV/0!	0		60.085	40.311	70.937	56.079	81.41	71.85	101.962	149.88	152	61.979	94.203	79.87		1	1	1	1	1	1	2	2	2	2	2	1		4	2	2	2	2	2
992	wt%														#DIV/0!	0		60.085	40.311	70.937	56.079	81.41	71.85	101.962	149.88	152	61.979	94.203	79.87		1	1	1	1	1	1	2	2	2	2	2	1		4	2	2	2	2	2
993	wt%														#DIV/0!	0		60.085	40.311	70.937	56.079	81.41	71.85	101.962	149.88	152	61.979	94.203	79.87		1	1	1	1	1	1	2	2	2	2	2	1		4	2	2	2	2	2
994	wt%														#DIV/0!	0		60.085	40.311	70.937	56.079	81.41	71.85	101.962	149.88	152	61.979	94.203	79.87		1	1	1	1	1	1	2	2	2	2	2	1		4	2	2	2	2	2
995	wt%														#DIV/0!	0		60.085	40.311	70.937	56.079	81.41	71.85	101.962	149.88	152	61.979	94.203	79.87		1	1	1	1	1	1	2	2	2	2	2	1		4	2	2	2	2	2
996	wt%														#DIV/0!	0		60.085	40.311	70.937	56.079	81.41	71.85	101.962	149.88	152	61.979	94.203	79.87		1	1	1	1	1	1	2	2	2	2	2	1		4	2	2	2	2	2
997	wt%														#DIV/0!	0		60.085	40.311	70.937	56.079	81.41	71.85	101.962	149.88	152	61.979	94.203	79.87		1	1	1	1	1	1	2	2	2	2	2	1		4	2	2	2	2	2
998	wt%														#DIV/0!	0		60.085	40.311	70.937	56.079	81.41	71.85	101.962	149.88	152	61.979	94.203	79.87		1	1	1	1	1	1	2	2	2	2	2	1		4	2	2	2	2	2
999	wt%														#DIV/0!	0		60.085	40.311	70.937	56.079	81.41	71.85	101.962	149.88	152	61.979	94.203	79.87		1	1	1	1	1	1	2	2	2	2	2	1		4	2	2	2	2	2
1000	wt%														#DIV/0!	0		60.085	40.311	70.937	56.079	81.41	71.85	101.962	149.88	152	61.979	94.203	79.87		1	1	1	1	1	1	2	2	2	2	2	1		4	2	2	2	2	2
1001	wt%														#DIV/0!	0		60.085	40.311	70.937	56.079	81.41	71.85	101.962	149.88	152	61.979	94.203	79.87		1	1	1	1	1	1	2	2	2	2	2	1		4	2	2	2	2	2
1002	wt%														#DIV/0!	0		60.085	40.311	70.937	56.079	81.41	71.85	101.962	149.88	152	61.979	94.203	79.87		1	1	1	1	1	1	2	2	2	2	2	1		4	2	2	2	2	2
1003	wt%														#DIV/0!	0		60.085	40.311	70.937	56.079	81.41	71.85	101.962	149.88	152	61.979	94.203	79.87		1	1	1	1	1	1	2	2	2	2	2	1		4	2	2	2	2	2
1004	wt%														#DIV/0!	0		60.085	40.311	70.937	56.079	81.41	71.85	101.962	149.88	152	61.979	94.203	79.87		1	1	1	1	1	1	2	2	2	2	2	1		4	2	2	2	2	2
1005	wt%														#DIV/0!	0		60.085	40.311	70.937	56.079	81.41	71.85	101.962	149.88	152	61.979	94.203	79.87		1	1	1	1	1	1	2	2	2	2	2	1		4	2	2	2	2	2
1006	wt%														#DIV/0!	0		60.085	40.311	70.937	56.079	81.41	71.85	101.962	149.88	152	61.979	94.203	79.87		1	1	1	1	1	1	2	2	2	2	2	1		4	2	2	2	2	2
1007	wt%														#DIV/0!	0		60.085	40.311	70.937	56.079	81.41	71.85	101.962	149.88	152	61.979	94.203	79.87		1	1	1	1	1	1	2	2	2	2	2	1		4	2	2	2	2	2
1008	wt%														#DIV/0!	0		60.085	40.311	70.937	56.079	81.41	71.85	101.962	149.88	152	61.979	94.203	79.87		1	1	1	1	1	1	2	2	2	2	2	1		4	2	2	2	2	2
1009	wt%														#DIV/0!	0		60.085	40.311	70.937	56.079	81.41	71.85	101.962	149.88	152	61.979	94.203	79.87		1	1	1	1	1	1	2	2	2	2	2	1		4	2	2	2	2	2
1010	wt%														#DIV/0!	0		60.085	40.311	70.937	56.079	81.41	71.85	101.962	149.88	152	61.979	94.203	79.87		1	1	1	1	1	1	2	2	2	2	2	1		4	2	2	2	2	2
1011	wt%														#DIV/0!	0		60.085	40.311	70.937	56.079	81.41	71.85	101.962	149.88	152	61.979	94.203	79.87		1	1	1	1	1	1	2	2	2	2	2	1		4	2	2	2	2	2
1012	wt%														#DIV/0!	0		60.085	40.311	70.937	56.079	81.41	71.85	101.962	149.88	152	61.979	94.203	79.87		1	1	1	1	1	1	2	2	2	2	2	1		4	2	2	2	2	2
1013	wt%														#DIV/0!	0		60.085	40.311	70.937	56.079	81.41	71.85	101.962	149.88	152	61.979	94.203	79.87		1	1	1	1	1	1	2	2	2	2	2	1		4	2	2	2	2	2
1014	wt%														#DIV/0!	0		60.085	40.311	70.937	56.079	81.41	71.85	101.962	149.88	152	61.979	94.203	79.87		1	1	1	1	1	1	2	2	2	2	2	1		4	2	2	2	2	2
1015	wt%														#DIV/0!	0		60.085	40.311	70.937	56.079	81.41	71.85	101.962	149.88	152	61.979	94.203	79.87		1	1	1	1	1	1	2	2	2	2	2	1		4	2	2	2	2	2
1016	wt%														#DIV/0!	0		60.085	40.311	70.937	56.079	81.41	71.85	101.962	149.88	152	61.979	94.203	79.87		1	1	1	1	1	1	2	2	2	2	2	1		4	2	2	2	2	2
1017	wt%														#DIV/0!	0		60.085	40.311	70.937	56.079	81.41	71.85	101.962	149.88	152	61.979	94.203	79.87		1	1	1	1	1	1	2	2	2	2	2	1		4	2	2	2	2	2
1018	wt%														#DIV/0!	0		60.085	40.311	70.937	56.079	81.41	71.85	101.962	149.88	152	61.979	94.203	79.87		1	1	1	1	1	1	2	2	2	2	2	1		4	2	2	2	2	2
1019	wt%														#DIV/0!	0		60.085	40.311	70.937	56.079	81.41	71.85	101.962	149.88	152	61.979	94.203	79.87		1	1	1	1	1	1	2	2	2	2	2	1		4	2	2	2	2	2
1020	wt%														#DIV/0!	0		60.085	40.311	70.937	56.079	81.41	71.85	101.962	149.88	152	61.979	94.203	79.87		1	1	1	1	1	1	2	2	2	2	2	1		4	2	2	2	2	2
1021	wt%														#DIV/0!	0		60.085	40.311	70.937	56.079	81.41	71.85	101.962	149.88	152	61.979	94.203	79.87		1	1	1	1	1	1	2	2	2	2	2	1		4	2	2	2	2	2
1022	wt%														#DIV/0!	0		60.085	40.311	70.937	56.079	81.41	71.85	101.962	149.88	152	61.979	94.203	79.87		1	1	1	1	1	1	2	2	2	2	2	1		4	2	2	2	2	2
1023	wt%														#DIV/0!	0		60.085	40.311	70.937	56.079	81.41	71.85	101.962	149.88	152	61.979	94.203	79.87		1	1	1	1	1	1	2	2	2	2	2	1		4	2	2	2	2	2
1024	wt%														#DIV/0!	0		60.085	40.311	70.937	56.079	81.41	71.85	101.962	149.88	152	61.979	94.203	79.87		1	1	1	1	1	1	2	2	2	2	2	1		4	2	2	2	2	2
1025	wt%														#DIV/0!	0		60.085	40.311	70.937	56.079	81.41	71.85	101.962	149.88	152	61.979	94.203	79.87		1	1	1	1	1	1	2	2	2	2	2	1		4	2	2	2	2	2
1026	wt%														#DIV/0!	0		60.085	40.311	70.937	56.079	81.41	71.85	101.962	149.88	152	61.979	94.203	79.87		1	1	1	1	1	1	2	2	2	2	2	1		4	2	2	2	2	2
1027	wt%														#DIV/0!	0		60.085	40.311	70.937	56.079	81.41	71.85	101.962	149.88	152	61.979	94.203	79.87		1	1	1	1	1	1	2	2	2	2	2	1		4	2	2	2	2	2
1028	wt%														#DIV/0!	0		60.085	40.311	70.937	56.079	81.41	71.85	101.962	149.88	152	61.979	94.203	79.87		1	1	1	1	1	1	2	2	2	2	2	1		4	2	2	2	2	2
1029	wt%														#DIV/0!	0		60.085	40.311	70.937	56.079	81.41	71.85	101.962	149.88	152	61.979	94.203	79.87		1	1	1	1	1	1	2	2	2	2	2	1		4	2	2	2	2	2
1030	wt%														#DIV/0!	0		60.085	40.311	70.937	56.079	81.41	71.85	101.962	149.88	152	61.979	94.203	79.87		1	1	1	1	1	1	2	2	2	2	2	1		4	2	2	2	2	2
1031	wt%														#DIV/0!	0		60.085	40.311	70.937	56.079	81.41	71.85	101.962	149.88	152	61.979	94.203	79.87		1	1	1	1	1	1	2	2	2	2	2	1		4	2	2	2	2	2
1032	wt%														#DIV/0!	0		60.085	40.311	70.937	56.079	81.41	71.85	101.962	149.88	152	61.979	94.203	79.87		1	1	1	1	1	1	2	2	2	2	2	1		4	2	2	2	2	2
1033	wt%														#DIV/0!	0		60.085	40.311	70.937	56.079	81.41	71.85	101.962	149.88	152	61.979	94.203	79.87		1	1	1	1	1	1	2	2	2	2	2	1		4	2	2	2	2	2
1034	wt%														#DIV/0!	0		60.085	40.311	70.937	56.079	81.41	71.85	101.962	149.88	152	61.979	94.203	79.87		1	1	1	1	1	1	2	2	2	2	2	1		4	2	2	2	2	2
1035	wt%														#DIV/0!	0		60.085	40.311	70.937	56.079	81.41	71.85	101.962	149.88	152	61.979	94.203	79.87		1	1	1	1	1	1	2	2	2	2	2	1		4	2	2	2	2	2
1036	wt%														#DIV/0!	0		60.085	40.311	70.937	56.079	81.41	71.85	101.962	149.88	152	61.979	94.203	79.87		1	1	1	1	1	1	2	2	2	2	2	1		4	2	2	2	2	2
1037	wt%														#DIV/0!	0		60.085	40.311	70.937	56.079	81.41	71.85	101.962	149.88	152	61.979	94.203	79.87		1	1	1	1	1	1	2	2	2	2	2	1		4	2	2	2	2	2
1038	wt%														#DIV/0!	0		60.085	40.311	70.937	56.079	81.41	71.85	101.962	149.88	152	61.979	94.203	79.87		1	1	1	1	1	1	2	2	2	2	2	1		4	2	2	2	2	2
1039	wt%														#DIV/0!	0		60.085	40.311	70.937	56.079	81.41	71.85	101.962	149.88	152	61.979	94.203	79.87		1	1	1	1	1	1	2	2	2	2	2	1		4	2	2	2	2	2
1040	wt%														#DIV/0!	0		60.085	40.311	70.937	56.079	81.41	71.85	101.962	149.88	152	61.979	94.203	79.87		1	1	1	1	1	1	2	2	2	2	2	1		4	2	2	2	2	2
1041	wt%														#DIV/0!	0		60.085	40.311	70.937	56.079	81.41	71.85	101.962	149.88	152	61.979	94.203	79.87		1	1	1	1	1	1	2	2	2	2	2	1		4	2	2	2	2	2
1042	wt%														#DIV/0!	0		60.085	40.311	70.937	56.079	81.41	71.85	101.962	149.88	152	61.979	94.203	79.87		1	1	1	1	1	1	2	2	2	2	2	1		4	2	2	2	2	2
1043	wt%														#DIV/0!	0		60.085	40.311	70.937	56.079	81.41	71.85	101.962	149.88	152	61.979	94.203	79.87		1	1	1	1	1	1	2	2	2	2	2	1		4	2	2	2	2	2
1044	wt%														#DIV/0!	0		60.085	40.311	70.937	56.079	81.41	71.85	101.962	149.88	152	61.979	94.203	79.87		1	1	1	1	1	1	2	2	2	2	2	1		4	2	2	2	2	2
1045	wt%														#DIV/0!	0		60.085	40.311	70.937	56.079	81.41	71.85	101.962	149.88	152	61.979	94.203	79.87		1	1	1	1	1	1	2	2	2	2	2	1		4	2	2	2	2	2
1046	wt%														#DIV/0!	0		60.085	40.311	70.937	56.079	81.41	71.85	101.962	149.88	152	61.979	94.203	79.87		1	1	1	1	1	1	2	2	2	2	2	1		4	2	2	2	2	2
1047	wt%														#DIV/0!	0		60.085	40.311	70.937	56.079	81.41	71.85	101.962	149.88	152	61.979	94.203	79.87		1	1	1	1	1	1	2	2	2	2	2	1		4	2	2	2	2	2
1048	wt%														#DIV/0!	0		60.085	40.311	70.937	56.079	81.41	71.85	101.962	149.88	152	61.979	94.203	79.87		1	1	1	1	1	1	2	2	2	2	2	1		4	2	2	2	2	2
1049	wt%														#DIV/0!	0		60.085	40.311	70.937	56.079	81.41	71.85	101.962	149.88	152	61.979	94.203	79.87		1	1	1	1	1	1	2	2	2	2	2	1		4	2	2	2	2	2
1050	wt%														#DIV/0!	0		60.085	40.311	70.937	56.079	81.41	71.85	101.962	149.88	152	61.979	94.203	79.87		1	1	1	1	1	1	2	2	2	2	2	1		4	2	2	2	2	2
1051	wt%														#DIV/0!	0		60.085	40.311	70.937	56.079	81.41	71.85	101.962	149.88	152	61.979	94.203	79.87		1	1	1	1	1	1	2	2	2	2	2	1		4	2	2	2	2	2
1052	wt%														#DIV/0!	0		60.085	40.311	70.937	56.079	81.41	71.85	101.962	149.88	152	61.979	94.203	79.87		1	1	1	1	1	1	2	2	2	2	2	1		4	2	2	2	2	2
1053	wt%														#DIV/0!	0		60.085	40.311	70.937	56.079	81.41	71.85	101.962	149.88	152	61.979	94.203	79.87		1	1	1	1	1	1	2	2	2	2	2	1		4	2	2	2	2	2
1054	wt%														#DIV/0!	0		60.085	40.311	70.937	56.079	81.41	71.85	101.962	149.88	152	61.979	94.203	79.87		1	1	1	1	1	1	2	2	2	2	2	1		4	2	2	2	2	2
1055	wt%														#DIV/0!	0		60.085	40.311	70.937	56.079	81.41	71.85	101.962	149.88	152	61.979	94.203	79.87		1	1	1	1	1	1	2	2	2	2	2	1		4	2	2	2	2	2
1056	wt%														#DIV/0!	0		60.085	40.311	70.937	56.079	81.41	71.85	101.962	149.88	152	61.979	94.203	79.87		1	1	1	1	1	1	2	2	2	2	2	1		4	2	2	2	2	2
1057	wt%														#DIV/0!	0		60.085	40.311	70.937	56.079	81.41	71.85	101.962	149.88	152	61.979	94.203	79.87		1	1	1	1	1	1	2	2	2	2	2	1		4	2	2	2	2	2
1058	wt%														#DIV/0!	0		60.085	40.311	70.937	56.079	81.41	71.85	101.962	149.88	152	61.979	94.203	79.87		1	1	1	1	1	1	2	2	2	2	2	1		4	2	2	2	2	2
1059	wt%														#DIV/0!	0		60.085	40.311	70.937	56.079	81.41	71.85	101.962	149.88	152	61.979	94.203	79.87		1	1	1	1	1	1	2	2	2	2	2	1		4	2	2	2	2	2
1060	wt%														#DIV/0!	0		60.085	40.311	70.937	56.079	81.41	71.85	101.962	149.88	152	61.979	94.203	79.87		1	1	1	1	1	1	2	2	2	2	2	1		4	2	2	2	2	2
1061	wt%														#DIV/0!	0		60.085	40.311	70.937	56.079	81.41	71.85	101.962	149.88	152	61.979	94.203	79.87		1	1	1	1	1	1	2	2	2	2	2	1		4	2	2	2	2	2
1062	wt%														#DIV/0!	0		60.085	40.311	70.937	56.079	81.41	71.85	101.962	149.88	152	61.979	94.203	79.87		1	1	1	1	1	1	2	2	2	2	2	1		4	2	2	2	2	2
1063	wt%														#DIV/0!	0		60.085	40.311	70.937	56.079	81.41	71.85	101.962	149.88	152	61.979	94.203	79.87		1	1	1	1	1	1	2	2	2	2	2	1		4	2	2	2	2	2
1064	wt%														#DIV/0!	0		60.085	40.311	70.937	56.079	81.41	71.85	101.962	149.88	152	61.979	94.203	79.87		1	1	1	1	1	1	2	2	2	2	2	1		4	2	2	2	2	2
1065	wt%														#DIV/0!	0		60.085	40.311	70.937	56.079	81.41	71.85	101.962	149.88	152	61.979	94.203	79.87		1	1	1	1	1	1	2	2	2	2	2	1		4	2	2	2	2	2
1066	wt%														#DIV/0!	0		60.085	40.311	70.937	56.079	81.41	71.85	101.962	149.88	152	61.979	94.203	79.87		1	1	1	1	1	1	2	2	2	2	2	1		4	2	2	2	2	2
1067	wt%														#DIV/0!	0		60.085	40.311	70.937	56.079	81.41	71.85	101.962	149.88	152	61.979	94.203	79.87		1	1	1	1	1	1	2	2	2	2	2	1		4	2	2	2	2	2
1068	wt%														#DIV/0!	0		60.085	40.311	70.937	56.079	81.41	71.85	101.962	149.88	152	61.979	94.203	79.87		1	1	1	1	1	1	2	2	2	2	2	1		4	2	2	2	2	2
1069	wt%														#DIV/0!	0		60.085	40.311	70.937	56.079	81.41	71.85	101.962	149.88	152	61.979	94.203	79.87		1	1	1	1	1	1	2	2	2	2	2	1		4	2	2	2	2	2
1070	wt%														#DIV/0!	0		60.085	40.311	70.937	56.079	81.41	71.85	101.962	149.88	152	61.979	94.203	79.87		1	1	1	1	1	1	2	2	2	2	2	1		4	2	2	2	2	2
1071	wt%														#DIV/0!	0		60.085	40.311	70.937	56.079	81.41	71.85	101.962	149.88	152	61.979	94.203	79.87		1	1	1	1	1	1	2	2	2	2	2	1		4	2	2	2	2	2
1072	wt%														#DIV/0!	0		60.085	40.311	70.937	56.079	81.41	71.85	101.962	149.88	152	61.979	94.203	79.87		1	1	1	1	1	1	2	2	2	2	2	1		4	2	2	2	2	2
1073	wt%														#DIV/0!	0		60.085	40.311	70.937	56.079	81.41	71.85	101.962	149.88	152	61.979	94.203	79.87		1	1	1	1	1	1	2	2	2	2	2	1		4	2	2	2	2	2
1074	wt%														#DIV/0!	0		60.085	40.311	70.937	56.079	81.41	71.85	101.962	149.88	152	61.979	94.203	79.87		1	1	1	1	1	1	2	2	2	2	2	1		4	2	2	2	2	2
1075	wt%														#DIV/0!	0		60.085	40.311	70.937	56.079	81.41	71.85	101.962	149.88	152	61.979	94.203	79.87		1	1	1	1	1	1	2	2	2	2	2	1		4	2	2	2	2	2
1076	wt%														#DIV/0!	0		60.085	40.311	70.937	56.079	81.41	71.85	101.962	149.88	152	61.979	94.203	79.87		1	1	1	1	1	1	2	2	2	2	2	1		4	2	2	2	2	2
1077	wt%														#DIV/0!	0		60.085	40.311	70.937	56.079	81.41	71.85	101.962	149.88	152	61.979	94.203	79.87		1	1	1	1	1	1	2	2	2	2	2	1		4	2	2	2	2	2
1078	wt%														#DIV/0!	0		60.085	40.311	70.937	56.079	81.41	71.85	101.962	149.88	152	61.979	94.203	79.87		1	1	1	1	1	1	2	2	2	2	2	1		4	2	2	2	2	2
1079	wt%														#DIV/0!	0		60.085	40.311	70.937	56.079	81.41	71.85	101.962	149.88	152	61.979	94.203	79.87		1	1	1	1	1	1	2	2	2	2	2	1		4	2	2	2	2	2
1080	wt%														#DIV/0!	0		60.085	40.311	70.937	56.079	81.41	71.85	101.962	149.88	152	61.979	94.203	79.87		1	1	1	1	1	1	2	2	2	2	2	1		4	2	2	2	2	2
1081	wt%														#DIV/0!	0		60.085	40.311	70.937	56.079	81.41	71.85	101.962	149.88	152	61.979	94.203	79.87		1	1	1	1	1	1	2	2	2	2	2	1		4	2	2	2	2	2
1082	wt%														#DIV/0!	0		60.085	40.311	70.937	56.079	81.41	71.85	101.962	149.88	152	61.979	94.203	79.87		1	1	1	1	1	1	2	2	2	2	2	1		4	2	2	2	2	2
1083	wt%														#DIV/0!	0		60.085	40.311	70.937	56.079	81.41	71.85	101.962	149.88	152	61.979	94.203	79.87		1	1	1	1	1	1	2	2	2	2	2	1		4	2	2	2	2	2
1084	wt%														#DIV/0!	0		60.085	40.311	70.937	56.079	81.41	71.85	101.962	149.88	152	61.979	94.203	79.87		1	1	1	1	1	1	2	2	2	2	2	1		4	2	2	2	2	2
1085	wt%														#DIV/0!	0		60.085	40.311	70.937	56.079	81.41	71.85	101.962	149.88	152	61.979	94.203	79.87		1	1	1	1	1	1	2	2	2	2	2	1		4	2	2	2	2	2
1086	wt%														#DIV/0!	0		60.085	40.311	70.937	56.079	81.41	71.85	101.962	149.88	152	61.979	94.203	79.87		1	1	1	1	1	1	2	2	2	2	2	1		4	2	2	2	2	2
1087	wt%														#DIV/0!	0		60.085	40.311	70.937	56.079	81.41	71.85	101.962	149.88	152	61.979	94.203	79.87		1	1	1	1	1	1	2	2	2	2	2	1		4	2	2	2	2	2
1088	wt%														#DIV/0!	0		60.085	40.311	70.937	56.079	81.41	71.85	101.962	149.88	152	61.979	94.203	79.87		1	1	1	1	1	1	2	2	2	2	2	1		4	2	2	2	2	2
1089	wt%														#DIV/0!	0		60.085	40.311	70.937	56.079	81.41	71.85	101.962	149.88	152	61.979	94.203	79.87		1	1	1	1	1	1	2	2	2	2	2	1		4	2	2	2	2	2
1090	wt%														#DIV/0!	0		60.085	40.311	70.937	56.079	81.41	71.85	101.962	149.88	152	61.979	94.203	79.87		1	1	1	1	1	1	2	2	2	2	2	1		4	2	2	2	2	2
1091	wt%														#DIV/0!	0		60.085	40.311	70.937	56.079	81.41	71.85	101.962	149.88	152	61.979	94.203	79.87		1	1	1	1	1	1	2	2	2	2	2	1		4	2	2	2	2	2
1092	wt%														#DIV/0!	0		60.085	40.311	70.937	56.079	81.41	71.85	101.962	149.88	152	61.979	94.203	79.87		1	1	1	1	1	1	2	2	2	2	2	1		4	2	2	2	2	2
1093	wt%														#DIV/0!	0		60.085	40.311	70.937	56.079	81.41	71.85	101.962	149.88	152	61.979	94.203	79.87		1	1	1	1	1	1	2	2	2	2	2	1		4	2	2	2	2	2
1094	wt%														#DIV/0!	0		60.085	40.311	70.937	56.079	81.41	71.85	101.962	149.88	152	61.979	94.203	79.87		1	1	1	1	1	1	2	2	2	2	2	1		4	2	2	2	2	2
1095	wt%														#DIV/0!	0		60.085	40.311	70.937	56.079	81.41	71.85	101.962	149.88	152	61.979	94.203	79.87		1	1	1	1	1	1	2	2	2	2	2	1		4	2	2	2	2	2
1096	wt%														#DIV/0!	0		60.085	40.311	70.937	56.079	81.41	71.85	101.962	149.88	152	61.979	94.203	79.87		1	1	1	1	1	1	2	2	2	2	2	1		4	2	2	2	2	2
1097	wt%														#DIV/0!	0		60.085	40.311	70.937	56.079	81.41	71.85	101.962	149.88	152	61.979	94.203	79.87		1	1	1	1	1	1	2	2	2	2	2	1		4	2	2	2	2	2
1098	wt%														#DIV/0!	0		60.085	40.311	70.937	56.079	81.41	71.85	101.962	149.88	152	61.979	94.203	79.87		1	1	1	1	1	1	2	2	2	2	2	1		4	2	2	2	2	2
1099	wt%														#DIV/0!	0		60.085	40.311	70.937	56.079	81.41	71.85	101.962	149.88	152	61.979	94.203	79.87		1	1	1	1	1	1	2	2	2	2	2	1		4	2	2	2	2	2
[truncated: 108 more columns]
