# Supplementary material
Source: MDPI journal article supplement (https://www.mdpi.com/2076-3263/13/6/170)
Supplement: s1 [file s1 › File S3 - Leached ilm 1.xlsx]

## Sheet: Direct Assessment of CLO 1
CLO1
Student #	Max	1	2	3	4	5	6	7	8	9	10	11	12	13	14	15	16	17	18	19	20	21	22	23	24	25	26	27	28	29	30	31	32	33	34	Average
AT1: Quiz 1	10	10	10	8	8	10																														9.2
AT2:Q1 Mid-Term Exam	10	7	10	10	10	10	6	10																												9
AT3
AT4
AT5
AT6
AT7
AT8
AT9
AT10
AT11
AT12
AT13
AT14
AT15
AT16
AT17
AT18
AT19
AT20
Student #		1	2	3	4	5	6	7	8	9	10	11	12	13	14	15	16	17	18	19	20	21	22	23	24	25	26	27	28	29	30	31	32	33	34
Target		0.7	0.7	0.7	0.7	0.7	0.7	0.7	0.7	0.7	0.7	0.7	0.7	0.7	0.7	0.7	0.7	0.7	0.7	0.7	0.7	0.7	0.7	0.7	0.7	0.7	0.7	0.7	0.7	0.7	0.7	0.7	0.7	0.7	0.7
Average AT1		0.92	0.92	0.92	0.92	0.92	0.92	0.92	0.92	0.92	0.92	0.92	0.92	0.92	0.92	0.92	0.92	0.92	0.92	0.92	0.92	0.92	0.92	0.92	0.92	0.92	0.92	0.92	0.92	0.92	0.92	0.92	0.92	0.92	0.92
Average AT2		0.9	0.9	0.9	0.9	0.9	0.9	0.9	0.9	0.9	0.9	0.9	0.9	0.9	0.9	0.9	0.9	0.9	0.9	0.9	0.9	0.9	0.9	0.9	0.9	0.9	0.9	0.9	0.9	0.9	0.9	0.9	0.9	0.9	0.9
AT1: Quiz 1		1	1	0.8	0.8	1	0	0
AT2:Q1 Mid-Term Exam		0.7	1	1	1	1	0.6	1
																								Number of students achieving CLO
																								5
																								6

## Sheet: Direct Assessment of CLO 2
CLO1
Student #	Max	1	2	3	4	5	6	7	8	9	10	11	12	13	14	15	16	17	18	19	20	21	22	23	24	25	26	27	28	29	30	31	32	33	34	Average
AT1: Quiz 1	10	10	10	8	6	9																														8.6
AT2:Q1 Mid-Term Exam	10	9	10	4	6	8	10	8																												7.85714
AT3
AT4
AT5
AT6
AT7
AT8
AT9
AT10
AT11
AT12
AT13
AT14
AT15
AT16
AT17
AT18
AT19
AT20
Student #		1	2	3	4	5	6	7	8	9	10	11	12	13	14	15	16	17	18	19	20	21	22	23	24	25	26	27	28	29	30	31	32	33	34
Target		0.7	0.7	0.7	0.7	0.7	0.7	0.7	0.7	0.7	0.7	0.7	0.7	0.7	0.7	0.7	0.7	0.7	0.7	0.7	0.7	0.7	0.7	0.7	0.7	0.7	0.7	0.7	0.7	0.7	0.7	0.7	0.7	0.7	0.7
Average AT1		0.86	0.86	0.86	0.86	0.86	0.86	0.86	0.86	0.86	0.86	0.86	0.86	0.86	0.86	0.86	0.86	0.86	0.86	0.86	0.86	0.86	0.86	0.86	0.86	0.86	0.86	0.86	0.86	0.86	0.86	0.86	0.86	0.86	0.86
Average AT2		0.785714	0.785714	0.785714	0.785714	0.785714	0.785714	0.785714	0.785714	0.785714	0.785714	0.785714	0.785714	0.785714	0.785714	0.785714	0.785714	0.785714	0.785714	0.785714	0.785714	0.785714	0.785714	0.785714	0.785714	0.785714	0.785714	0.785714	0.785714	0.785714	0.785714	0.785714	0.785714	0.785714	0.785714
AT1: Quiz 1		1	1	0.8	0.6	0.9	0	0
AT2:Q1 Mid-Term Exam		0.9	1	0.4	0.6	0.8	1	0.8
																								Number of students achieving CLO
																								4
																								5

## Sheet: Direct Assessment of CLO 3
CLO1
Student #	Max	1	2	3	4	5	6	7	8	9	10	11	12	13	14	15	16	17	18	19	20	21	22	23	24	25	26	27	28	29	30	31	32	33	34	Average
AT1: Quiz 2	10	9	10	9	9	9	8	10																												9.14286
AT2:Q1 Mid-Term Exam	10	9	10	5	9	6	10	8																												8.14286
AT3
AT4
AT5
AT6
AT7
AT8
AT9
AT10
AT11
AT12
AT13
AT14
AT15
AT16
AT17
AT18
AT19
AT20
Student #		1	2	3	4	5	6	7	8	9	10	11	12	13	14	15	16	17	18	19	20	21	22	23	24	25	26	27	28	29	30	31	32	33	34
Target		0.7	0.7	0.7	0.7	0.7	0.7	0.7	0.7	0.7	0.7	0.7	0.7	0.7	0.7	0.7	0.7	0.7	0.7	0.7	0.7	0.7	0.7	0.7	0.7	0.7	0.7	0.7	0.7	0.7	0.7	0.7	0.7	0.7	0.7
Average AT1		0.914286	0.914286	0.914286	0.914286	0.914286	0.914286	0.914286	0.914286	0.914286	0.914286	0.914286	0.914286	0.914286	0.914286	0.914286	0.914286	0.914286	0.914286	0.914286	0.914286	0.914286	0.914286	0.914286	0.914286	0.914286	0.914286	0.914286	0.914286	0.914286	0.914286	0.914286	0.914286	0.914286	0.914286
Average AT2		0.814286	0.814286	0.814286	0.814286	0.814286	0.814286	0.814286	0.814286	0.814286	0.814286	0.814286	0.814286	0.814286	0.814286	0.814286	0.814286	0.814286	0.814286	0.814286	0.814286	0.814286	0.814286	0.814286	0.814286	0.814286	0.814286	0.814286	0.814286	0.814286	0.814286	0.814286	0.814286	0.814286	0.814286
AT1: Quiz 2		0.9	1	0.9	0.9	0.9	0.8	1
AT2:Q1 Mid-Term Exam		0.9	1	0.5	0.9	0.6	1	0.8
																								Number of students achieving CLO
																								7
																								5

## Sheet: Direct Assessment of CLO 4
CLO1
Student #	Max	1	2	3	4	5	6	7	8	9	10	11	12	13	14	15	16	17	18	19	20	21	22	23	24	25	26	27	28	29	30	31	32	33	34	Average
AT1: Quiz 3	10	5	10	10	10	10	10	10																												9.28571
AT2:Q2 Mid-Term Exam	10	7	8	7	8	7	8	7																												7.42857
AT3
AT4
AT5
AT6
AT7
AT8
AT9
AT10
AT11
AT12
AT13
AT14
AT15
AT16
AT17
AT18
AT19
AT20
Student #		1	2	3	4	5	6	7	8	9	10	11	12	13	14	15	16	17	18	19	20	21	22	23	24	25	26	27	28	29	30	31	32	33	34
Target		0.7	0.7	0.7	0.7	0.7	0.7	0.7	0.7	0.7	0.7	0.7	0.7	0.7	0.7	0.7	0.7	0.7	0.7	0.7	0.7	0.7	0.7	0.7	0.7	0.7	0.7	0.7	0.7	0.7	0.7	0.7	0.7	0.7	0.7
Average AT1		0.928571	0.928571	0.928571	0.928571	0.928571	0.928571	0.928571	0.928571	0.928571	0.928571	0.928571	0.928571	0.928571	0.928571	0.928571	0.928571	0.928571	0.928571	0.928571	0.928571	0.928571	0.928571	0.928571	0.928571	0.928571	0.928571	0.928571	0.928571	0.928571	0.928571	0.928571	0.928571	0.928571	0.928571
Average AT2		0.742857	0.742857	0.742857	0.742857	0.742857	0.742857	0.742857	0.742857	0.742857	0.742857	0.742857	0.742857	0.742857	0.742857	0.742857	0.742857	0.742857	0.742857	0.742857	0.742857	0.742857	0.742857	0.742857	0.742857	0.742857	0.742857	0.742857	0.742857	0.742857	0.742857	0.742857	0.742857	0.742857	0.742857
AT1: Quiz 3		0.5	1	1	1	1	1	1
AT2:Q2 Mid-Term Exam		0.7	0.8	0.7	0.8	0.7	0.8	0.7
																								Number of students achieving CLO
																								6
																								7

## Sheet: Direct Assessment of CLO 5
CLO1
Student #	Max	1	2	3	4	5	6	7	8	9	10	11	12	13	14	15	16	17	18	19	20	21	22	23	24	25	26	27	28	29	30	31	32	33	34	Average
AT1: Quiz 5	10	10	8	10	10	9	6	7																												8.57143
AT2:Q3 Mid-Term Exam	6	6	1	2	3	1	5	0																												2.57143
AT3
AT4
AT5
AT6
AT7
AT8
AT9
AT10
AT11
AT12
AT13
AT14
AT15
AT16
AT17
AT18
AT19
AT20
Student #		1	2	3	4	5	6	7	8	9	10	11	12	13	14	15	16	17	18	19	20	21	22	23	24	25	26	27	28	29	30	31	32	33	34
Target		0.7	0.7	0.7	0.7	0.7	0.7	0.7	0.7	0.7	0.7	0.7	0.7	0.7	0.7	0.7	0.7	0.7	0.7	0.7	0.7	0.7	0.7	0.7	0.7	0.7	0.7	0.7	0.7	0.7	0.7	0.7	0.7	0.7	0.7
Average AT1		0.857143	0.857143	0.857143	0.857143	0.857143	0.857143	0.857143	0.857143	0.857143	0.857143	0.857143	0.857143	0.857143	0.857143	0.857143	0.857143	0.857143	0.857143	0.857143	0.857143	0.857143	0.857143	0.857143	0.857143	0.857143	0.857143	0.857143	0.857143	0.857143	0.857143	0.857143	0.857143	0.857143	0.857143
Average AT2		0.428571	0.428571	0.428571	0.428571	0.428571	0.428571	0.428571	0.428571	0.428571	0.428571	0.428571	0.428571	0.428571	0.428571	0.428571	0.428571	0.428571	0.428571	0.428571	0.428571	0.428571	0.428571	0.428571	0.428571	0.428571	0.428571	0.428571	0.428571	0.428571	0.428571	0.428571	0.428571	0.428571	0.428571
AT1: Quiz 5		1	0.8	1	1	0.9	0.6	0.7
AT2:Q3 Mid-Term Exam		1	0.166667	0.333333	0.5	0.166667	0.833333	0
																								Number of students achieving CLO
																								6
																								2

## Sheet: Direct Assessment of CLO 6
CLO1
Student #	Max	1	2	3	4	5	6	7	8	9	10	11	12	13	14	15	16	17	18	19	20	21	22	23	24	25	26	27	28	29	30	31	32	33	34	Average
AT1: Quiz 6	10	9	10	8	7	9	10	8																												8.71429
AT2:HW 10	10	9	10	9	9	9	9	9																												9.14286
AT3
AT4
AT5
AT6
AT7
AT8
AT9
AT10
AT11
AT12
AT13
AT14
AT15
AT16
AT17
AT18
AT19
AT20
Student #		1	2	3	4	5	6	7	8	9	10	11	12	13	14	15	16	17	18	19	20	21	22	23	24	25	26	27	28	29	30	31	32	33	34
Target		0.7	0.7	0.7	0.7	0.7	0.7	0.7	0.7	0.7	0.7	0.7	0.7	0.7	0.7	0.7	0.7	0.7	0.7	0.7	0.7	0.7	0.7	0.7	0.7	0.7	0.7	0.7	0.7	0.7	0.7	0.7	0.7	0.7	0.7
Average AT1		0.871429	0.871429	0.871429	0.871429	0.871429	0.871429	0.871429	0.871429	0.871429	0.871429	0.871429	0.871429	0.871429	0.871429	0.871429	0.871429	0.871429	0.871429	0.871429	0.871429	0.871429	0.871429	0.871429	0.871429	0.871429	0.871429	0.871429	0.871429	0.871429	0.871429	0.871429	0.871429	0.871429	0.871429
Average AT2		0.914286	0.914286	0.914286	0.914286	0.914286	0.914286	0.914286	0.914286	0.914286	0.914286	0.914286	0.914286	0.914286	0.914286	0.914286	0.914286	0.914286	0.914286	0.914286	0.914286	0.914286	0.914286	0.914286	0.914286	0.914286	0.914286	0.914286	0.914286	0.914286	0.914286	0.914286	0.914286	0.914286	0.914286
AT1: Quiz 6		0.9	1	0.8	0.7	0.9	1	0.8
AT2:HW10		0.9	1	0.9	0.9	0.9	0.9	0.9
																								Number of students achieving CLO
																								7
																								7

## Sheet: Direct Assessment of CLO 7
CLO1
Student #	Max	1	2	3	4	5	6	7	8	9	10	11	12	13	14	15	16	17	18	19	20	21	22	23	24	25	26	27	28	29	30	31	32	33	34	Average
AT1: HW 11	10	10	9	9	9	9	9	9																												9.14286
AT2:Q5 Final-Exam	6	4	3	0	3	3	3	0																												2.28571
AT3
AT4
AT5
AT6
AT7
AT8
AT9
AT10
AT11
AT12
AT13
AT14
AT15
AT16
AT17
AT18
AT19
AT20
Student #		1	2	3	4	5	6	7	8	9	10	11	12	13	14	15	16	17	18	19	20	21	22	23	24	25	26	27	28	29	30	31	32	33	34
Target		0.6	0.6	0.6	0.6	0.6	0.6	0.6	0.6	0.6	0.6	0.6	0.6	0.6	0.6	0.6	0.6	0.6	0.6	0.6	0.6	0.6	0.6	0.6	0.6	0.6	0.6	0.6	0.6	0.6	0.6	0.6	0.6	0.6	0.6
Average AT1		0.914286	0.914286	0.914286	0.914286	0.914286	0.914286	0.914286	0.914286	0.914286	0.914286	0.914286	0.914286	0.914286	0.914286	0.914286	0.914286	0.914286	0.914286	0.914286	0.914286	0.914286	0.914286	0.914286	0.914286	0.914286	0.914286	0.914286	0.914286	0.914286	0.914286	0.914286	0.914286	0.914286	0.914286
Average AT2		0.380952	0.380952	0.380952	0.380952	0.380952	0.380952	0.380952	0.380952	0.380952	0.380952	0.380952	0.380952	0.380952	0.380952	0.380952	0.380952	0.380952	0.380952	0.380952	0.380952	0.380952	0.380952	0.380952	0.380952	0.380952	0.380952	0.380952	0.380952	0.380952	0.380952	0.380952	0.380952	0.380952	0.380952
AT1: HW 11		1	0.9	0.9	0.9	0.9	0.9	0.9
AT2:Q5 Final Term Exam		0.666667	0.5	0	0.5	0.5	0.5	0
																								Number of students achieving CLO
																								7
																								1

## Sheet: Indirect Assessment
STUDENT COURSE EXIT SURVEY FOR CLOs -SCORE (1 - 5)
Student #	1	2	3	4	5	6	7	8	9	10	11	12	13	14	15	16	17	18	19	20	21	22	23	24	25	26	27	28	29	30	Average
CLO1	3	4	4	5	5	5																									4.33333
CLO2	5	5	4	4	4	3																									4.16667
CLO3	5	5	5	5	5	4																									4.83333
CLO4	5	5	5	4	3	3																									4.16667
CLO5	5	5	5	5	4	3																									4.5
CLO6	5	5	5	5	4	4																									4.66667
CLO7	5	5	5	4	4	4																									4.5
CLO8
CLO9
CLO10
CLO11
CLO12
CLO13
CLO14
CLO15
CLO16
CLO17
CLO18
CLO19
CLO20
Target	3	3	3	3	3	3	3	3	3	3	3	3	3	3	3	3	3	3	3	3	3	3	3	3	3	3	3	3	3	3	3
Average of CLO 1	4.33333	4.33333	4.33333	4.33333	4.33333	4.33333
Average CLO 2	4.16667	4.16667	4.16667	4.16667	4.16667	4.16667
Average CLO 3	4.83333	4.83333	4.83333	4.83333	4.83333	4.83333
Average CLO 4	4.16667	4.16667	4.16667	4.16667	4.16667	4.16667
Average CLO 5	4.5	4.5	4.5	4.5	4.5	4.5
Average CLO 6	4.66667	4.66667	4.66667	4.66667	4.66667	4.66667
Average CLO 7	4.5	4.5	4.5	4.5	4.5	4.5

## Sheet: Grade
Oxides	wt%	Mol wt	Mol Prop	No cations	Charge	Cations Norm	O norm to 3 Ti	W1
SiO2	0.01	60.085	0.000166431	1	4	0.000717756	0.00143551	0.00287102
MgO	0.07	40.311	0.0017365	1	2	0.00748889	0.00748889	0.0149778
MnO	1.82	70.937	0.0256566	1	2	0.110647	0.110647	0.221295
CaO	0.01	56.079	0.00017832	1	2	0.000769029	0.000769029	0.00153806
ZnO	0.1	81.41	0.00122835	1	2	0.00529743	0.00529743	0.0105949
FeO	37.96	71.846	0.528352	1	2	2.27859	2.27859	4.55718
Al2O3	0.05	101.962	0.000490379	2	3	0.00422965	0.00634447	0.0126889
V2O3	0	149.88	0	2	3	0	0	0
Cr2O3	0.03	152	0.000197368	2	3	0.00170236	0.00255353	0.00510707
Na2O	0	61.979	0	2	1	0	0	0
K2O	0	94.203	0	2	1	0	0	0
TiO2	55.56	79.87	0.69563	1	4	3	6	12
Ti factor	4.31263
Y Ferric	1.17375
X Ferrous	1.10484
FeO%	18.4061
Fe2O3%	21.7244
Mollec Form										Fe ferrous	Fe ferric	Other cations	Ti	O	Loss of iron atoms
										1.10484	1.17375	0.130853	3	9	0.586873
Total	95.61					0.130853	8.41313	0.269073
Total	97.7805
