# Supplementary material
Source: MDPI journal article supplement (https://www.mdpi.com/2076-3263/13/6/170)
Supplement: s1 [file s1 › File S5 -Pseudorutile 1.xlsx]

## Sheet: Direct Assessment of CLO 1
CLO1
Student #	Max	1	2	3	4	5	6	7	8	9	10	11	12	13	14	15	16	17	18	19	20	21	22	23	24	25	26	27	28	29	30	31	32	33	34	Average
AT1: Quiz 1	10	10	10	8	8	10																														9.2
AT2:Q1 Mid-Term Exam	10	7	10	10	10	10	6	10																												9
AT3
AT4
AT5
AT6
AT7
AT8
AT9
AT10
AT11
AT12
AT13
AT14
AT15
AT16
AT17
AT18
AT19
AT20
Student #		1	2	3	4	5	6	7	8	9	10	11	12	13	14	15	16	17	18	19	20	21	22	23	24	25	26	27	28	29	30	31	32	33	34
Target		0.7	0.7	0.7	0.7	0.7	0.7	0.7	0.7	0.7	0.7	0.7	0.7	0.7	0.7	0.7	0.7	0.7	0.7	0.7	0.7	0.7	0.7	0.7	0.7	0.7	0.7	0.7	0.7	0.7	0.7	0.7	0.7	0.7	0.7
Average AT1		0.92	0.92	0.92	0.92	0.92	0.92	0.92	0.92	0.92	0.92	0.92	0.92	0.92	0.92	0.92	0.92	0.92	0.92	0.92	0.92	0.92	0.92	0.92	0.92	0.92	0.92	0.92	0.92	0.92	0.92	0.92	0.92	0.92	0.92
Average AT2		0.9	0.9	0.9	0.9	0.9	0.9	0.9	0.9	0.9	0.9	0.9	0.9	0.9	0.9	0.9	0.9	0.9	0.9	0.9	0.9	0.9	0.9	0.9	0.9	0.9	0.9	0.9	0.9	0.9	0.9	0.9	0.9	0.9	0.9
AT1: Quiz 1		1	1	0.8	0.8	1	0	0
AT2:Q1 Mid-Term Exam		0.7	1	1	1	1	0.6	1
																								Number of students achieving CLO
																								5
																								6

## Sheet: Direct Assessment of CLO 2
CLO1
Student #	Max	1	2	3	4	5	6	7	8	9	10	11	12	13	14	15	16	17	18	19	20	21	22	23	24	25	26	27	28	29	30	31	32	33	34	Average
AT1: Quiz 1	10	10	10	8	6	9																														8.6
AT2:Q1 Mid-Term Exam	10	9	10	4	6	8	10	8																												7.85714
AT3
AT4
AT5
AT6
AT7
AT8
AT9
AT10
AT11
AT12
AT13
AT14
AT15
AT16
AT17
AT18
AT19
AT20
Student #		1	2	3	4	5	6	7	8	9	10	11	12	13	14	15	16	17	18	19	20	21	22	23	24	25	26	27	28	29	30	31	32	33	34
Target		0.7	0.7	0.7	0.7	0.7	0.7	0.7	0.7	0.7	0.7	0.7	0.7	0.7	0.7	0.7	0.7	0.7	0.7	0.7	0.7	0.7	0.7	0.7	0.7	0.7	0.7	0.7	0.7	0.7	0.7	0.7	0.7	0.7	0.7
Average AT1		0.86	0.86	0.86	0.86	0.86	0.86	0.86	0.86	0.86	0.86	0.86	0.86	0.86	0.86	0.86	0.86	0.86	0.86	0.86	0.86	0.86	0.86	0.86	0.86	0.86	0.86	0.86	0.86	0.86	0.86	0.86	0.86	0.86	0.86
Average AT2		0.785714	0.785714	0.785714	0.785714	0.785714	0.785714	0.785714	0.785714	0.785714	0.785714	0.785714	0.785714	0.785714	0.785714	0.785714	0.785714	0.785714	0.785714	0.785714	0.785714	0.785714	0.785714	0.785714	0.785714	0.785714	0.785714	0.785714	0.785714	0.785714	0.785714	0.785714	0.785714	0.785714	0.785714
AT1: Quiz 1		1	1	0.8	0.6	0.9	0	0
AT2:Q1 Mid-Term Exam		0.9	1	0.4	0.6	0.8	1	0.8
																								Number of students achieving CLO
																								4
																								5

## Sheet: Direct Assessment of CLO 3
CLO1
Student #	Max	1	2	3	4	5	6	7	8	9	10	11	12	13	14	15	16	17	18	19	20	21	22	23	24	25	26	27	28	29	30	31	32	33	34	Average
AT1: Quiz 2	10	9	10	9	9	9	8	10																												9.14286
AT2:Q1 Mid-Term Exam	10	9	10	5	9	6	10	8																												8.14286
AT3
AT4
AT5
AT6
AT7
AT8
AT9
AT10
AT11
AT12
AT13
AT14
AT15
AT16
AT17
AT18
AT19
AT20
Student #		1	2	3	4	5	6	7	8	9	10	11	12	13	14	15	16	17	18	19	20	21	22	23	24	25	26	27	28	29	30	31	32	33	34
Target		0.7	0.7	0.7	0.7	0.7	0.7	0.7	0.7	0.7	0.7	0.7	0.7	0.7	0.7	0.7	0.7	0.7	0.7	0.7	0.7	0.7	0.7	0.7	0.7	0.7	0.7	0.7	0.7	0.7	0.7	0.7	0.7	0.7	0.7
Average AT1		0.914286	0.914286	0.914286	0.914286	0.914286	0.914286	0.914286	0.914286	0.914286	0.914286	0.914286	0.914286	0.914286	0.914286	0.914286	0.914286	0.914286	0.914286	0.914286	0.914286	0.914286	0.914286	0.914286	0.914286	0.914286	0.914286	0.914286	0.914286	0.914286	0.914286	0.914286	0.914286	0.914286	0.914286
Average AT2		0.814286	0.814286	0.814286	0.814286	0.814286	0.814286	0.814286	0.814286	0.814286	0.814286	0.814286	0.814286	0.814286	0.814286	0.814286	0.814286	0.814286	0.814286	0.814286	0.814286	0.814286	0.814286	0.814286	0.814286	0.814286	0.814286	0.814286	0.814286	0.814286	0.814286	0.814286	0.814286	0.814286	0.814286
AT1: Quiz 2		0.9	1	0.9	0.9	0.9	0.8	1
AT2:Q1 Mid-Term Exam		0.9	1	0.5	0.9	0.6	1	0.8
																								Number of students achieving CLO
																								7
																								5

## Sheet: Direct Assessment of CLO 4
CLO1
Student #	Max	1	2	3	4	5	6	7	8	9	10	11	12	13	14	15	16	17	18	19	20	21	22	23	24	25	26	27	28	29	30	31	32	33	34	Average
AT1: Quiz 3	10	5	10	10	10	10	10	10																												9.28571
AT2:Q2 Mid-Term Exam	10	7	8	7	8	7	8	7																												7.42857
AT3
AT4
AT5
AT6
AT7
AT8
AT9
AT10
AT11
AT12
AT13
AT14
AT15
AT16
AT17
AT18
AT19
AT20
Student #		1	2	3	4	5	6	7	8	9	10	11	12	13	14	15	16	17	18	19	20	21	22	23	24	25	26	27	28	29	30	31	32	33	34
Target		0.7	0.7	0.7	0.7	0.7	0.7	0.7	0.7	0.7	0.7	0.7	0.7	0.7	0.7	0.7	0.7	0.7	0.7	0.7	0.7	0.7	0.7	0.7	0.7	0.7	0.7	0.7	0.7	0.7	0.7	0.7	0.7	0.7	0.7
Average AT1		0.928571	0.928571	0.928571	0.928571	0.928571	0.928571	0.928571	0.928571	0.928571	0.928571	0.928571	0.928571	0.928571	0.928571	0.928571	0.928571	0.928571	0.928571	0.928571	0.928571	0.928571	0.928571	0.928571	0.928571	0.928571	0.928571	0.928571	0.928571	0.928571	0.928571	0.928571	0.928571	0.928571	0.928571
Average AT2		0.742857	0.742857	0.742857	0.742857	0.742857	0.742857	0.742857	0.742857	0.742857	0.742857	0.742857	0.742857	0.742857	0.742857	0.742857	0.742857	0.742857	0.742857	0.742857	0.742857	0.742857	0.742857	0.742857	0.742857	0.742857	0.742857	0.742857	0.742857	0.742857	0.742857	0.742857	0.742857	0.742857	0.742857
AT1: Quiz 3		0.5	1	1	1	1	1	1
AT2:Q2 Mid-Term Exam		0.7	0.8	0.7	0.8	0.7	0.8	0.7
																								Number of students achieving CLO
																								6
																								7

## Sheet: Direct Assessment of CLO 5
CLO1
Student #	Max	1	2	3	4	5	6	7	8	9	10	11	12	13	14	15	16	17	18	19	20	21	22	23	24	25	26	27	28	29	30	31	32	33	34	Average
AT1: Quiz 5	10	10	8	10	10	9	6	7																												8.57143
AT2:Q3 Mid-Term Exam	6	6	1	2	3	1	5	0																												2.57143
AT3
AT4
AT5
AT6
AT7
AT8
AT9
AT10
AT11
AT12
AT13
AT14
AT15
AT16
AT17
AT18
AT19
AT20
Student #		1	2	3	4	5	6	7	8	9	10	11	12	13	14	15	16	17	18	19	20	21	22	23	24	25	26	27	28	29	30	31	32	33	34
Target		0.7	0.7	0.7	0.7	0.7	0.7	0.7	0.7	0.7	0.7	0.7	0.7	0.7	0.7	0.7	0.7	0.7	0.7	0.7	0.7	0.7	0.7	0.7	0.7	0.7	0.7	0.7	0.7	0.7	0.7	0.7	0.7	0.7	0.7
Average AT1		0.857143	0.857143	0.857143	0.857143	0.857143	0.857143	0.857143	0.857143	0.857143	0.857143	0.857143	0.857143	0.857143	0.857143	0.857143	0.857143	0.857143	0.857143	0.857143	0.857143	0.857143	0.857143	0.857143	0.857143	0.857143	0.857143	0.857143	0.857143	0.857143	0.857143	0.857143	0.857143	0.857143	0.857143
Average AT2		0.428571	0.428571	0.428571	0.428571	0.428571	0.428571	0.428571	0.428571	0.428571	0.428571	0.428571	0.428571	0.428571	0.428571	0.428571	0.428571	0.428571	0.428571	0.428571	0.428571	0.428571	0.428571	0.428571	0.428571	0.428571	0.428571	0.428571	0.428571	0.428571	0.428571	0.428571	0.428571	0.428571	0.428571
AT1: Quiz 5		1	0.8	1	1	0.9	0.6	0.7
AT2:Q3 Mid-Term Exam		1	0.166667	0.333333	0.5	0.166667	0.833333	0
																								Number of students achieving CLO
																								6
																								2

## Sheet: Direct Assessment of CLO 6
CLO1
Student #	Max	1	2	3	4	5	6	7	8	9	10	11	12	13	14	15	16	17	18	19	20	21	22	23	24	25	26	27	28	29	30	31	32	33	34	Average
AT1: Quiz 6	10	9	10	8	7	9	10	8																												8.71429
AT2:HW 10	10	9	10	9	9	9	9	9																												9.14286
AT3
AT4
AT5
AT6
AT7
AT8
AT9
AT10
AT11
AT12
AT13
AT14
AT15
AT16
AT17
AT18
AT19
AT20
Student #		1	2	3	4	5	6	7	8	9	10	11	12	13	14	15	16	17	18	19	20	21	22	23	24	25	26	27	28	29	30	31	32	33	34
Target		0.7	0.7	0.7	0.7	0.7	0.7	0.7	0.7	0.7	0.7	0.7	0.7	0.7	0.7	0.7	0.7	0.7	0.7	0.7	0.7	0.7	0.7	0.7	0.7	0.7	0.7	0.7	0.7	0.7	0.7	0.7	0.7	0.7	0.7
Average AT1		0.871429	0.871429	0.871429	0.871429	0.871429	0.871429	0.871429	0.871429	0.871429	0.871429	0.871429	0.871429	0.871429	0.871429	0.871429	0.871429	0.871429	0.871429	0.871429	0.871429	0.871429	0.871429	0.871429	0.871429	0.871429	0.871429	0.871429	0.871429	0.871429	0.871429	0.871429	0.871429	0.871429	0.871429
Average AT2		0.914286	0.914286	0.914286	0.914286	0.914286	0.914286	0.914286	0.914286	0.914286	0.914286	0.914286	0.914286	0.914286	0.914286	0.914286	0.914286	0.914286	0.914286	0.914286	0.914286	0.914286	0.914286	0.914286	0.914286	0.914286	0.914286	0.914286	0.914286	0.914286	0.914286	0.914286	0.914286	0.914286	0.914286
AT1: Quiz 6		0.9	1	0.8	0.7	0.9	1	0.8
AT2:HW10		0.9	1	0.9	0.9	0.9	0.9	0.9
																								Number of students achieving CLO
																								7
																								7

## Sheet: Direct Assessment of CLO 7
CLO1
Student #	Max	1	2	3	4	5	6	7	8	9	10	11	12	13	14	15	16	17	18	19	20	21	22	23	24	25	26	27	28	29	30	31	32	33	34	Average
AT1: HW 11	10	10	9	9	9	9	9	9																												9.14286
AT2:Q5 Final-Exam	6	4	3	0	3	3	3	0																												2.28571
AT3
AT4
AT5
AT6
AT7
AT8
AT9
AT10
AT11
AT12
AT13
AT14
AT15
AT16
AT17
AT18
AT19
AT20
Student #		1	2	3	4	5	6	7	8	9	10	11	12	13	14	15	16	17	18	19	20	21	22	23	24	25	26	27	28	29	30	31	32	33	34
Target		0.6	0.6	0.6	0.6	0.6	0.6	0.6	0.6	0.6	0.6	0.6	0.6	0.6	0.6	0.6	0.6	0.6	0.6	0.6	0.6	0.6	0.6	0.6	0.6	0.6	0.6	0.6	0.6	0.6	0.6	0.6	0.6	0.6	0.6
Average AT1		0.914286	0.914286	0.914286	0.914286	0.914286	0.914286	0.914286	0.914286	0.914286	0.914286	0.914286	0.914286	0.914286	0.914286	0.914286	0.914286	0.914286	0.914286	0.914286	0.914286	0.914286	0.914286	0.914286	0.914286	0.914286	0.914286	0.914286	0.914286	0.914286	0.914286	0.914286	0.914286	0.914286	0.914286
Average AT2		0.380952	0.380952	0.380952	0.380952	0.380952	0.380952	0.380952	0.380952	0.380952	0.380952	0.380952	0.380952	0.380952	0.380952	0.380952	0.380952	0.380952	0.380952	0.380952	0.380952	0.380952	0.380952	0.380952	0.380952	0.380952	0.380952	0.380952	0.380952	0.380952	0.380952	0.380952	0.380952	0.380952	0.380952
AT1: HW 11		1	0.9	0.9	0.9	0.9	0.9	0.9
AT2:Q5 Final Term Exam		0.666667	0.5	0	0.5	0.5	0.5	0
																								Number of students achieving CLO
																								7
																								1

## Sheet: Indirect Assessment
STUDENT COURSE EXIT SURVEY FOR CLOs -SCORE (1 - 5)
Student #	1	2	3	4	5	6	7	8	9	10	11	12	13	14	15	16	17	18	19	20	21	22	23	24	25	26	27	28	29	30	Average
CLO1	3	4	4	5	5	5																									4.33333
CLO2	5	5	4	4	4	3																									4.16667
CLO3	5	5	5	5	5	4																									4.83333
CLO4	5	5	5	4	3	3																									4.16667
CLO5	5	5	5	5	4	3																									4.5
CLO6	5	5	5	5	4	4																									4.66667
CLO7	5	5	5	4	4	4																									4.5
CLO8
CLO9
CLO10
CLO11
CLO12
CLO13
CLO14
CLO15
CLO16
CLO17
CLO18
CLO19
CLO20
Target	3	3	3	3	3	3	3	3	3	3	3	3	3	3	3	3	3	3	3	3	3	3	3	3	3	3	3	3	3	3	3
Average of CLO 1	4.33333	4.33333	4.33333	4.33333	4.33333	4.33333
Average CLO 2	4.16667	4.16667	4.16667	4.16667	4.16667	4.16667
Average CLO 3	4.83333	4.83333	4.83333	4.83333	4.83333	4.83333
Average CLO 4	4.16667	4.16667	4.16667	4.16667	4.16667	4.16667
Average CLO 5	4.5	4.5	4.5	4.5	4.5	4.5
Average CLO 6	4.66667	4.66667	4.66667	4.66667	4.66667	4.66667
Average CLO 7	4.5	4.5	4.5	4.5	4.5	4.5

## Sheet: Grade
Oxides	wt%	Mol wt	Mol Prop	No cations	Charge	Cations Norm	Atom wt	O norm to 3 Ti	W1 FG	W2 GH
SiO2	0.12	60.085	0.00199717	1	4	0.00724625	28.09	0.0144925	0.028985	0.203547
MgO	0.08	40.311	0.00198457	1	2	0.00720053	24.31	0.00720053	0.0144011	0.175045
MnO	1.33	70.937	0.018749	1	2	0.0680263	54.94	0.0680263	0.136053	3.73736
CaO	0.04	56.079	0.000713279	1	2	0.00258796	40.08	0.00258796	0.00517592	0.103725
ZnO	0.04	81.41	0.00049134	1	2	0.00178271	65.41	0.00178271	0.00356542	0.116607
Fe2O3	26.9	159.694	0.168447	2	3	1.22234	55.85	1.83351	3.66702	68.2676
V2O3	0.08	149.88	0.00053376	2	3	0.00387324	50.94	0.00580986	0.0116197	0.197303
Al2O3	0.52	101.962	0.00509994	2	3	0.0370078	26.98	0.0555116	0.111023	0.99847
Cr2O3	0.06	152	0.000394737	2	3	0.00286441	52	0.00429662	0.00859324	0.148949
Na2O	0	61.979	0	2	1	0	22.99	0	0	0
K2O	0	94.203	0	2	1	0	39.1	0	0	0
TiO2	66.04	79.87	0.826844	1	4	3	47.87	6	12
Ti factor	3.62826
Y	2.01357
X	6.98643
OH %	9.41276
H2O %	4.985
Sum W1
Sum W2
Mollec Form												Fe	Ti3	Ox	OHy	Loss ferric iron
												1.35293	3	6.98643	2.01357	0.647072
Total	95.21					1.35293		7.99322	3.98643	73.9486
