# Supplementary material
Source: MDPI journal article supplement (https://www.mdpi.com/2076-3263/13/6/170)
Supplement: s1 [file s1 › File S6 - Pseudorutile 2.xlsx]

## Sheet: Direct Assessment of CLO 1
CLO1
Student #	Max	1	2	3	4	5	6	7	8	9	10	11	12	13	14	15	16	17	18	19	20	21	22	23	24	25	26	27	28	29	30	31	32	33	34	Average
AT1: Quiz 1	10	10	10	8	8	10																														9.2
AT2:Q1 Mid-Term Exam	10	7	10	10	10	10	6	10																												9
AT3
AT4
AT5
AT6
AT7
AT8
AT9
AT10
AT11
AT12
AT13
AT14
AT15
AT16
AT17
AT18
AT19
AT20
Student #		1	2	3	4	5	6	7	8	9	10	11	12	13	14	15	16	17	18	19	20	21	22	23	24	25	26	27	28	29	30	31	32	33	34
Target		0.7	0.7	0.7	0.7	0.7	0.7	0.7	0.7	0.7	0.7	0.7	0.7	0.7	0.7	0.7	0.7	0.7	0.7	0.7	0.7	0.7	0.7	0.7	0.7	0.7	0.7	0.7	0.7	0.7	0.7	0.7	0.7	0.7	0.7
Average AT1		0.92	0.92	0.92	0.92	0.92	0.92	0.92	0.92	0.92	0.92	0.92	0.92	0.92	0.92	0.92	0.92	0.92	0.92	0.92	0.92	0.92	0.92	0.92	0.92	0.92	0.92	0.92	0.92	0.92	0.92	0.92	0.92	0.92	0.92
Average AT2		0.9	0.9	0.9	0.9	0.9	0.9	0.9	0.9	0.9	0.9	0.9	0.9	0.9	0.9	0.9	0.9	0.9	0.9	0.9	0.9	0.9	0.9	0.9	0.9	0.9	0.9	0.9	0.9	0.9	0.9	0.9	0.9	0.9	0.9
AT1: Quiz 1		1	1	0.8	0.8	1	0	0
AT2:Q1 Mid-Term Exam		0.7	1	1	1	1	0.6	1
																								Number of students achieving CLO
																								5
																								6

## Sheet: Direct Assessment of CLO 2
CLO1
Student #	Max	1	2	3	4	5	6	7	8	9	10	11	12	13	14	15	16	17	18	19	20	21	22	23	24	25	26	27	28	29	30	31	32	33	34	Average
AT1: Quiz 1	10	10	10	8	6	9																														8.6
AT2:Q1 Mid-Term Exam	10	9	10	4	6	8	10	8																												7.85714
AT3
AT4
AT5
AT6
AT7
AT8
AT9
AT10
AT11
AT12
AT13
AT14
AT15
AT16
AT17
AT18
AT19
AT20
Student #		1	2	3	4	5	6	7	8	9	10	11	12	13	14	15	16	17	18	19	20	21	22	23	24	25	26	27	28	29	30	31	32	33	34
Target		0.7	0.7	0.7	0.7	0.7	0.7	0.7	0.7	0.7	0.7	0.7	0.7	0.7	0.7	0.7	0.7	0.7	0.7	0.7	0.7	0.7	0.7	0.7	0.7	0.7	0.7	0.7	0.7	0.7	0.7	0.7	0.7	0.7	0.7
Average AT1		0.86	0.86	0.86	0.86	0.86	0.86	0.86	0.86	0.86	0.86	0.86	0.86	0.86	0.86	0.86	0.86	0.86	0.86	0.86	0.86	0.86	0.86	0.86	0.86	0.86	0.86	0.86	0.86	0.86	0.86	0.86	0.86	0.86	0.86
Average AT2		0.785714	0.785714	0.785714	0.785714	0.785714	0.785714	0.785714	0.785714	0.785714	0.785714	0.785714	0.785714	0.785714	0.785714	0.785714	0.785714	0.785714	0.785714	0.785714	0.785714	0.785714	0.785714	0.785714	0.785714	0.785714	0.785714	0.785714	0.785714	0.785714	0.785714	0.785714	0.785714	0.785714	0.785714
AT1: Quiz 1		1	1	0.8	0.6	0.9	0	0
AT2:Q1 Mid-Term Exam		0.9	1	0.4	0.6	0.8	1	0.8
																								Number of students achieving CLO
																								4
																								5

## Sheet: Direct Assessment of CLO 3
CLO1
Student #	Max	1	2	3	4	5	6	7	8	9	10	11	12	13	14	15	16	17	18	19	20	21	22	23	24	25	26	27	28	29	30	31	32	33	34	Average
AT1: Quiz 2	10	9	10	9	9	9	8	10																												9.14286
AT2:Q1 Mid-Term Exam	10	9	10	5	9	6	10	8																												8.14286
AT3
AT4
AT5
AT6
AT7
AT8
AT9
AT10
AT11
AT12
AT13
AT14
AT15
AT16
AT17
AT18
AT19
AT20
Student #		1	2	3	4	5	6	7	8	9	10	11	12	13	14	15	16	17	18	19	20	21	22	23	24	25	26	27	28	29	30	31	32	33	34
Target		0.7	0.7	0.7	0.7	0.7	0.7	0.7	0.7	0.7	0.7	0.7	0.7	0.7	0.7	0.7	0.7	0.7	0.7	0.7	0.7	0.7	0.7	0.7	0.7	0.7	0.7	0.7	0.7	0.7	0.7	0.7	0.7	0.7	0.7
Average AT1		0.914286	0.914286	0.914286	0.914286	0.914286	0.914286	0.914286	0.914286	0.914286	0.914286	0.914286	0.914286	0.914286	0.914286	0.914286	0.914286	0.914286	0.914286	0.914286	0.914286	0.914286	0.914286	0.914286	0.914286	0.914286	0.914286	0.914286	0.914286	0.914286	0.914286	0.914286	0.914286	0.914286	0.914286
Average AT2		0.814286	0.814286	0.814286	0.814286	0.814286	0.814286	0.814286	0.814286	0.814286	0.814286	0.814286	0.814286	0.814286	0.814286	0.814286	0.814286	0.814286	0.814286	0.814286	0.814286	0.814286	0.814286	0.814286	0.814286	0.814286	0.814286	0.814286	0.814286	0.814286	0.814286	0.814286	0.814286	0.814286	0.814286
AT1: Quiz 2		0.9	1	0.9	0.9	0.9	0.8	1
AT2:Q1 Mid-Term Exam		0.9	1	0.5	0.9	0.6	1	0.8
																								Number of students achieving CLO
																								7
																								5

## Sheet: Direct Assessment of CLO 4
CLO1
Student #	Max	1	2	3	4	5	6	7	8	9	10	11	12	13	14	15	16	17	18	19	20	21	22	23	24	25	26	27	28	29	30	31	32	33	34	Average
AT1: Quiz 3	10	5	10	10	10	10	10	10																												9.28571
AT2:Q2 Mid-Term Exam	10	7	8	7	8	7	8	7																												7.42857
AT3
AT4
AT5
AT6
AT7
AT8
AT9
AT10
AT11
AT12
AT13
AT14
AT15
AT16
AT17
AT18
AT19
AT20
Student #		1	2	3	4	5	6	7	8	9	10	11	12	13	14	15	16	17	18	19	20	21	22	23	24	25	26	27	28	29	30	31	32	33	34
Target		0.7	0.7	0.7	0.7	0.7	0.7	0.7	0.7	0.7	0.7	0.7	0.7	0.7	0.7	0.7	0.7	0.7	0.7	0.7	0.7	0.7	0.7	0.7	0.7	0.7	0.7	0.7	0.7	0.7	0.7	0.7	0.7	0.7	0.7
Average AT1		0.928571	0.928571	0.928571	0.928571	0.928571	0.928571	0.928571	0.928571	0.928571	0.928571	0.928571	0.928571	0.928571	0.928571	0.928571	0.928571	0.928571	0.928571	0.928571	0.928571	0.928571	0.928571	0.928571	0.928571	0.928571	0.928571	0.928571	0.928571	0.928571	0.928571	0.928571	0.928571	0.928571	0.928571
Average AT2		0.742857	0.742857	0.742857	0.742857	0.742857	0.742857	0.742857	0.742857	0.742857	0.742857	0.742857	0.742857	0.742857	0.742857	0.742857	0.742857	0.742857	0.742857	0.742857	0.742857	0.742857	0.742857	0.742857	0.742857	0.742857	0.742857	0.742857	0.742857	0.742857	0.742857	0.742857	0.742857	0.742857	0.742857
AT1: Quiz 3		0.5	1	1	1	1	1	1
AT2:Q2 Mid-Term Exam		0.7	0.8	0.7	0.8	0.7	0.8	0.7
																								Number of students achieving CLO
																								6
																								7

## Sheet: Direct Assessment of CLO 5
CLO1
Student #	Max	1	2	3	4	5	6	7	8	9	10	11	12	13	14	15	16	17	18	19	20	21	22	23	24	25	26	27	28	29	30	31	32	33	34	Average
AT1: Quiz 5	10	10	8	10	10	9	6	7																												8.57143
AT2:Q3 Mid-Term Exam	6	6	1	2	3	1	5	0																												2.57143
AT3
AT4
AT5
AT6
AT7
AT8
AT9
AT10
AT11
AT12
AT13
AT14
AT15
AT16
AT17
AT18
AT19
AT20
Student #		1	2	3	4	5	6	7	8	9	10	11	12	13	14	15	16	17	18	19	20	21	22	23	24	25	26	27	28	29	30	31	32	33	34
Target		0.7	0.7	0.7	0.7	0.7	0.7	0.7	0.7	0.7	0.7	0.7	0.7	0.7	0.7	0.7	0.7	0.7	0.7	0.7	0.7	0.7	0.7	0.7	0.7	0.7	0.7	0.7	0.7	0.7	0.7	0.7	0.7	0.7	0.7
Average AT1		0.857143	0.857143	0.857143	0.857143	0.857143	0.857143	0.857143	0.857143	0.857143	0.857143	0.857143	0.857143	0.857143	0.857143	0.857143	0.857143	0.857143	0.857143	0.857143	0.857143	0.857143	0.857143	0.857143	0.857143	0.857143	0.857143	0.857143	0.857143	0.857143	0.857143	0.857143	0.857143	0.857143	0.857143
Average AT2		0.428571	0.428571	0.428571	0.428571	0.428571	0.428571	0.428571	0.428571	0.428571	0.428571	0.428571	0.428571	0.428571	0.428571	0.428571	0.428571	0.428571	0.428571	0.428571	0.428571	0.428571	0.428571	0.428571	0.428571	0.428571	0.428571	0.428571	0.428571	0.428571	0.428571	0.428571	0.428571	0.428571	0.428571
AT1: Quiz 5		1	0.8	1	1	0.9	0.6	0.7
AT2:Q3 Mid-Term Exam		1	0.166667	0.333333	0.5	0.166667	0.833333	0
																								Number of students achieving CLO
																								6
																								2

## Sheet: Direct Assessment of CLO 6
CLO1
Student #	Max	1	2	3	4	5	6	7	8	9	10	11	12	13	14	15	16	17	18	19	20	21	22	23	24	25	26	27	28	29	30	31	32	33	34	Average
AT1: Quiz 6	10	9	10	8	7	9	10	8																												8.71429
AT2:HW 10	10	9	10	9	9	9	9	9																												9.14286
AT3
AT4
AT5
AT6
AT7
AT8
AT9
AT10
AT11
AT12
AT13
AT14
AT15
AT16
AT17
AT18
AT19
AT20
Student #		1	2	3	4	5	6	7	8	9	10	11	12	13	14	15	16	17	18	19	20	21	22	23	24	25	26	27	28	29	30	31	32	33	34
Target		0.7	0.7	0.7	0.7	0.7	0.7	0.7	0.7	0.7	0.7	0.7	0.7	0.7	0.7	0.7	0.7	0.7	0.7	0.7	0.7	0.7	0.7	0.7	0.7	0.7	0.7	0.7	0.7	0.7	0.7	0.7	0.7	0.7	0.7
Average AT1		0.871429	0.871429	0.871429	0.871429	0.871429	0.871429	0.871429	0.871429	0.871429	0.871429	0.871429	0.871429	0.871429	0.871429	0.871429	0.871429	0.871429	0.871429	0.871429	0.871429	0.871429	0.871429	0.871429	0.871429	0.871429	0.871429	0.871429	0.871429	0.871429	0.871429	0.871429	0.871429	0.871429	0.871429
Average AT2		0.914286	0.914286	0.914286	0.914286	0.914286	0.914286	0.914286	0.914286	0.914286	0.914286	0.914286	0.914286	0.914286	0.914286	0.914286	0.914286	0.914286	0.914286	0.914286	0.914286	0.914286	0.914286	0.914286	0.914286	0.914286	0.914286	0.914286	0.914286	0.914286	0.914286	0.914286	0.914286	0.914286	0.914286
AT1: Quiz 6		0.9	1	0.8	0.7	0.9	1	0.8
AT2:HW10		0.9	1	0.9	0.9	0.9	0.9	0.9
																								Number of students achieving CLO
																								7
																								7

## Sheet: Direct Assessment of CLO 7
CLO1
Student #	Max	1	2	3	4	5	6	7	8	9	10	11	12	13	14	15	16	17	18	19	20	21	22	23	24	25	26	27	28	29	30	31	32	33	34	Average
AT1: HW 11	10	10	9	9	9	9	9	9																												9.14286
AT2:Q5 Final-Exam	6	4	3	0	3	3	3	0																												2.28571
AT3
AT4
AT5
AT6
AT7
AT8
AT9
AT10
AT11
AT12
AT13
AT14
AT15
AT16
AT17
AT18
AT19
AT20
Student #		1	2	3	4	5	6	7	8	9	10	11	12	13	14	15	16	17	18	19	20	21	22	23	24	25	26	27	28	29	30	31	32	33	34
Target		0.6	0.6	0.6	0.6	0.6	0.6	0.6	0.6	0.6	0.6	0.6	0.6	0.6	0.6	0.6	0.6	0.6	0.6	0.6	0.6	0.6	0.6	0.6	0.6	0.6	0.6	0.6	0.6	0.6	0.6	0.6	0.6	0.6	0.6
Average AT1		0.914286	0.914286	0.914286	0.914286	0.914286	0.914286	0.914286	0.914286	0.914286	0.914286	0.914286	0.914286	0.914286	0.914286	0.914286	0.914286	0.914286	0.914286	0.914286	0.914286	0.914286	0.914286	0.914286	0.914286	0.914286	0.914286	0.914286	0.914286	0.914286	0.914286	0.914286	0.914286	0.914286	0.914286
Average AT2		0.380952	0.380952	0.380952	0.380952	0.380952	0.380952	0.380952	0.380952	0.380952	0.380952	0.380952	0.380952	0.380952	0.380952	0.380952	0.380952	0.380952	0.380952	0.380952	0.380952	0.380952	0.380952	0.380952	0.380952	0.380952	0.380952	0.380952	0.380952	0.380952	0.380952	0.380952	0.380952	0.380952	0.380952
AT1: HW 11		1	0.9	0.9	0.9	0.9	0.9	0.9
AT2:Q5 Final Term Exam		0.666667	0.5	0	0.5	0.5	0.5	0
																								Number of students achieving CLO
																								7
																								1

## Sheet: Indirect Assessment
STUDENT COURSE EXIT SURVEY FOR CLOs -SCORE (1 - 5)
Student #	1	2	3	4	5	6	7	8	9	10	11	12	13	14	15	16	17	18	19	20	21	22	23	24	25	26	27	28	29	30	Average
CLO1	3	4	4	5	5	5																									4.33333
CLO2	5	5	4	4	4	3																									4.16667
CLO3	5	5	5	5	5	4																									4.83333
CLO4	5	5	5	4	3	3																									4.16667
CLO5	5	5	5	5	4	3																									4.5
CLO6	5	5	5	5	4	4																									4.66667
CLO7	5	5	5	4	4	4																									4.5
CLO8
CLO9
CLO10
CLO11
CLO12
CLO13
CLO14
CLO15
CLO16
CLO17
CLO18
CLO19
CLO20
Target	3	3	3	3	3	3	3	3	3	3	3	3	3	3	3	3	3	3	3	3	3	3	3	3	3	3	3	3	3	3	3
Average of CLO 1	4.33333	4.33333	4.33333	4.33333	4.33333	4.33333
Average CLO 2	4.16667	4.16667	4.16667	4.16667	4.16667	4.16667
Average CLO 3	4.83333	4.83333	4.83333	4.83333	4.83333	4.83333
Average CLO 4	4.16667	4.16667	4.16667	4.16667	4.16667	4.16667
Average CLO 5	4.5	4.5	4.5	4.5	4.5	4.5
Average CLO 6	4.66667	4.66667	4.66667	4.66667	4.66667	4.66667
Average CLO 7	4.5	4.5	4.5	4.5	4.5	4.5

## Sheet: Grade
No	Oxides	SiO2	MgO	MnO	CaO	ZnO	Fe2O3	V2O3	Al2O3	Cr2O3	Na2O	K2O	TiO2		Mol wt													No cations													Charge
1	wt%	1.82	0.7	0.62	0.19	0	29.22		0.73	0.05	0.02	0.04	63.73		60.085	40.311	70.937	56.079	81.41	159.694	149.88	101.962	152	61.979	94.203	79.87		1	1	1	1	1	2	2	2	2	2	2	1		4	2	2	2	2	3	3	3	3
2	wt%	0.74	0.32	0.57	0.15	0	29.56		0.27	0.04	0	0	65.34		60.085	40.311	70.937	56.079	81.41	159.694	149.88	101.962	152	61.979	94.203	79.87		1	1	1	1	1	2	2	2	2	2	2	1		4	2	2	2	2	3	3	3	3
3	wt%	0.46	0.24	0.65	0.18	0	30.02		0.26	0.05	0	0	65.49		60.085	40.311	70.937	56.079	81.41	159.694	149.88	101.962	152	61.979	94.203	79.87		1	1	1	1	1	2	2	2	2	2	2	1		4	2	2	2	2	3	3	3	3
4	wt%	0.47	0.22	0.58	0.2	0	27.82		0.29	0.05	0.01	0.01	65.82		60.085	40.311	70.937	56.079	81.41	159.694	149.88	101.962	152	61.979	94.203	79.87		1	1	1	1	1	2	2	2	2	2	2	1		4	2	2	2	2	3	3	3	3
5	wt%	0.57	0.23	0.67	0.23	0	26.59		0.38	0.08	0.06	0.02	66.14		60.085	40.311	70.937	56.079	81.41	159.694	149.88	101.962	152	61.979	94.203	79.87		1	1	1	1	1	2	2	2	2	2	2	1		4	2	2	2	2	3	3	3	3
6	wt%	0.68	0.28	0.36	0.17	0	26.03		0.35	0.05	0.03	0.03	67.51		60.085	40.311	70.937	56.079	81.41	159.694	149.88	101.962	152	61.979	94.203	79.87		1	1	1	1	1	2	2	2	2	2	2	1		4	2	2	2	2	3	3	3	3
7	wt%	0.71	0.28	0.44	0.22	0	23.64		0.45	0.07	0.03	0.01	69.15		60.085	40.311	70.937	56.079	81.41	159.694	149.88	101.962	152	61.979	94.203	79.87		1	1	1	1	1	2	2	2	2	2	2	1		4	2	2	2	2	3	3	3	3
8	wt%	0.84	0.29	0.67	0.2	0	22.48		0.46	0.11	0.04	0.02	69.81		60.085	40.311	70.937	56.079	81.41	159.694	149.88	101.962	152	61.979	94.203	79.87		1	1	1	1	1	2	2	2	2	2	2	1		4	2	2	2	2	3	3	3	3
9	wt%	0.9	0.3	0.59	0.26	0	19.59		0.55	0.11	0.06	0.03	70.4		60.085	40.311	70.937	56.079	81.41	159.694	149.88	101.962	152	61.979	94.203	79.87		1	1	1	1	1	2	2	2	2	2	2	1		4	2	2	2	2	3	3	3	3
10	wt%	0.045	0.141	0.385	0.018	0.009	25.748	0.833	0.251	0.44	0	0	70.924		60.085	40.311	70.937	56.079	81.41	159.694	149.88	101.962	152	61.979	94.203	79.87		1	1	1	1	1	2	2	2	2	2	2	1		4	2	2	2	2	3	3	3	3
11	wt%	0	0.728	0.28	0.014	0.034	21.696	0.749	0.202	0.212	0	0	75.439		60.085	40.311	70.937	56.079	81.41	159.694	149.88	101.962	152	61.979	94.203	79.87		1	1	1	1	1	2	2	2	2	2	2	1		4	2	2	2	2	3	3	3	3
12	wt%	0	1.469	0.332	0.006	0	28.0295	0.596	0	0.041	0	0	68.187		60.085	40.311	70.937	56.079	81.41	159.694	149.88	101.962	152	61.979	94.203	79.87		1	1	1	1	1	2	2	2	2	2	2	1		4	2	2	2	2	3	3	3	3
13	wt%	0	0.728	0.067	0	0.009	19.0816	0.734	0.004	0.076	0	0	78.844		60.085	40.311	70.937	56.079	81.41	159.694	149.88	101.962	152	61.979	94.203	79.87		1	1	1	1	1	2	2	2	2	2	2	1		4	2	2	2	2	3	3	3	3
14	wt%	0	2.38	0.36	0.02	0	43.529	0	0.06	0.21	0	0	55.19		60.085	40.311	70.937	56.079	81.41	159.694	149.88	101.962	152	61.979	94.203	79.87		1	1	1	1	1	2	2	2	2	2	2	1		4	2	2	2	2	3	3	3	3
15	wt%	0	1.61	0.27	0	0	31.9857	0	0.03	0.15	0	0	66.14		60.085	40.311	70.937	56.079	81.41	159.694	149.88	101.962	152	61.979	94.203	79.87		1	1	1	1	1	2	2	2	2	2	2	1		4	2	2	2	2	3	3	3	3
16	wt%	0	5.551	0.227	0.017	0.017	24.2341	0.661	0.062	0.24	0	0	68.716		60.085	40.311	70.937	56.079	81.41	159.694	149.88	101.962	152	61.979	94.203	79.87		1	1	1	1	1	2	2	2	2	2	2	1		4	2	2	2	2	3	3	3	3
17	wt%	0.019	4.774	0.17	0	0.024	22.9193	0.775	0.042	0.279	0	0	71.234		60.085	40.311	70.937	56.079	81.41	159.694	149.88	101.962	152	61.979	94.203	79.87		1	1	1	1	1	2	2	2	2	2	2	1		4	2	2	2	2	3	3	3	3
18	wt%	0.013	4.114	0.269	0.007	0.024	21.0833	0.794	0.047	0.251	0	0	72.967		60.085	40.311	70.937	56.079	81.41	159.694	149.88	101.962	152	61.979	94.203	79.87		1	1	1	1	1	2	2	2	2	2	2	1		4	2	2	2	2	3	3	3	3
19	wt%	0.006	4.062	0.244	0	0	20.5076	0.8	0.057	0.247	0	0	73.726		60.085	40.311	70.937	56.079	81.41	159.694	149.88	101.962	152	61.979	94.203	79.87		1	1	1	1	1	2	2	2	2	2	2	1		4	2	2	2	2	3	3	3	3
20	wt%	0	2.766	0.119	0.014	0.088	18.2025	0.828	0.04	0.244	0	0	77.368		60.085	40.311	70.937	56.079	81.41	159.694	149.88	101.962	152	61.979	94.203	79.87		1	1	1	1	1	2	2	2	2	2	2	1		4	2	2	2	2	3	3	3	3
21	wt%	0	3.571	0.155	0	0.026	17.4334	0.755	0.04	0.191	0	0	77.723		60.085	40.311	70.937	56.079	81.41	159.694	149.88	101.962	152	61.979	94.203	79.87		1	1	1	1	1	2	2	2	2	2	2	1		4	2	2	2	2	3	3	3	3
22	wt%	0	3.074	0.173	0.036	0.072	14.3804	0.755	0.023	0.126	0	0	80.595		60.085	40.311	70.937	56.079	81.41	159.694	149.88	101.962	152	61.979	94.203	79.87		1	1	1	1	1	2	2	2	2	2	2	1		4	2	2	2	2	3	3	3	3
23	wt%	0	0.071	0.097	0.032	0	25.9023	1.078	0	0.061	0	0	71.873		60.085	40.311	70.937	56.079	81.41	159.694	149.88	101.962	152	61.979	94.203	79.87		1	1	1	1	1	2	2	2	2	2	2	1		4	2	2	2	2	3	3	3	3
24	wt%	1.23	0.232	0.223	0.912	0.055	7.99097	0.958	1.009	0.003	0	0	80.405		60.085	40.311	70.937	56.079	81.41	159.694	149.88	101.962	152	61.979	94.203	79.87		1	1	1	1	1	2	2	2	2	2	2	1		4	2	2	2	2	3	3	3	3
25	wt%	1.84	0.4	0.194	1.167	0.04	6.74286	1.008	1.436	0.039	0	0	81.202		60.085	40.311	70.937	56.079	81.41	159.694	149.88	101.962	152	61.979	94.203	79.87		1	1	1	1	1	2	2	2	2	2	2	1		4	2	2	2	2	3	3	3	3
26	wt%	0.417	0.269	0.127	0.395	0.046	10.7472	1.102	1.166	0.026	0	0	81.289		60.085	40.311	70.937	56.079	81.41	159.694	149.88	101.962	152	61.979	94.203	79.87		1	1	1	1	1	2	2	2	2	2	2	1		4	2	2	2	2	3	3	3	3
27	wt%	23.648	18.769	0.143	0.655	0.031	17.6779	0.263	17.124	0.034	0	0	13.955		60.085	40.311	70.937	56.079	81.41	159.694	149.88	101.962	152	61.979	94.203	79.87		1	1	1	1	1	2	2	2	2	2	2	1		4	2	2	2	2	3	3	3	3
28	wt%	7.235	0.821	0.364	1.207	0.041	18.2681	0.714	2.589	0.132	0	0	41.554		60.085	40.311	70.937	56.079	81.41	159.694	149.88	101.962	152	61.979	94.203	79.87		1	1	1	1	1	2	2	2	2	2	2	1		4	2	2	2	2	3	3	3	3
29	wt%	7.766	1.411	0.853	1.254	0.015	17.06	0.544	3.751	0.058	0	0	43.355		60.085	40.311	70.937	56.079	81.41	159.694	149.88	101.962	152	61.979	94.203	79.87		1	1	1	1	1	2	2	2	2	2	2	1		4	2	2	2	2	3	3	3	3
30	wt%	1.02	0.239	1.024	0.749	0	20.5331	0.569	0.727	0.481	0	0	46.776		60.085	40.311	70.937	56.079	81.41	159.694	149.88	101.962	152	61.979	94.203	79.87		1	1	1	1	1	2	2	2	2	2	2	1		4	2	2	2	2	3	3	3	3
31	wt%	3.628	0.851	0.279	1.507	0	16.4509	0.668	2.042	0.025	0	0	47.647		60.085	40.311	70.937	56.079	81.41	159.694	149.88	101.962	152	61.979	94.203	79.87		1	1	1	1	1	2	2	2	2	2	2	1		4	2	2	2	2	3	3	3	3
32	wt%	7.704	0.678	0.32	3.499	0.116	11.054	0.569	2.224	0.079	0	0	50.955		60.085	40.311	70.937	56.079	81.41	159.694	149.88	101.962	152	61.979	94.203	79.87		1	1	1	1	1	2	2	2	2	2	2	1		4	2	2	2	2	3	3	3	3
33	wt%	4.961	0.895	0.55	2.173	0	11.5952	0.597	1.64	0.023	0	0	52.528		60.085	40.311	70.937	56.079	81.41	159.694	149.88	101.962	152	61.979	94.203	79.87		1	1	1	1	1	2	2	2	2	2	2	1		4	2	2	2	2	3	3	3	3
34	wt%	7.286	1.001	0.177	0.63	0.027	6.31942	0.705	3.641	0.009	0	0	56.14		60.085	40.311	70.937	56.079	81.41	159.694	149.88	101.962	152	61.979	94.203	79.87		1	1	1	1	1	2	2	2	2	2	2	1		4	2	2	2	2	3	3	3	3
35	wt%	0.019	0.041	0.13	0.029	0	28.1795	0.458	0.036	0.02	0	0	69.798		60.085	40.311	70.937	56.079	81.41	159.694	149.88	101.962	152	61.979	94.203	79.87		1	1	1	1	1	2	2	2	2	2	2	1		4	2	2	2	2	3	3	3	3
36	wt%	0.197	0.151	0.232	0.231	0.012	18.0958	0.455	0.45	0.023	0	0	72.098		60.085	40.311	70.937	56.079	81.41	159.694	149.88	101.962	152	61.979	94.203	79.87		1	1	1	1	1	2	2	2	2	2	2	1		4	2	2	2	2	3	3	3	3
37	wt%	0.03	0.051	0.152	0.059	0.054	33.3242	0.674	0	0.288	0	0	65.388		60.085	40.311	70.937	56.079	81.41	159.694	149.88	101.962	152	61.979	94.203	79.87		1	1	1	1	1	2	2	2	2	2	2	1		4	2	2	2	2	3	3	3	3
38	wt%	0	0.063	0.183	0.034	0.036	22.3792	0.596	0	0.108	0	0	72.534		60.085	40.311	70.937	56.079	81.41	159.694	149.88	101.962	152	61.979	94.203	79.87		1	1	1	1	1	2	2	2	2	2	2	1		4	2	2	2	2	3	3	3	3
39	wt%	0	0.015	0.152	0.006	0	20.1841	0.691	0	0.14	0	0	74.65		60.085	40.311	70.937	56.079	81.41	159.694	149.88	101.962	152	61.979	94.203	79.87		1	1	1	1	1	2	2	2	2	2	2	1		4	2	2	2	2	3	3	3	3
40	wt%	0.019	0.017	0.187	0.02	0	20.2319	0.6	0	0.016	0	0	76.255		60.085	40.311	70.937	56.079	81.41	159.694	149.88	101.962	152	61.979	94.203	79.87		1	1	1	1	1	2	2	2	2	2	2	1		4	2	2	2	2	3	3	3	3
41	wt%	0	0.002	0.307	0.034	0	41.142	0.427	0	0.019	0	0	57.595		60.085	40.311	70.937	56.079	81.41	159.694	149.88	101.962	152	61.979	94.203	79.87		1	1	1	1	1	2	2	2	2	2	2	1		4	2	2	2	2	3	3	3	3
42	wt%	0	0.027	0.137	0.015	0.006	25.365	0.555	0	0.042	0	0	74.811		60.085	40.311	70.937	56.079	81.41	159.694	149.88	101.962	152	61.979	94.203	79.87		1	1	1	1	1	2	2	2	2	2	2	1		4	2	2	2	2	3	3	3	3
43	wt%	0	0.06	0.142	0	0.067	36.2705	0.365	0	0.004	0	0	59.82		60.085	40.311	70.937	56.079	81.41	159.694	149.88	101.962	152	61.979	94.203	79.87		1	1	1	1	1	2	2	2	2	2	2	1		4	2	2	2	2	3	3	3	3
44	wt%	9.173	0.516	0.511	0.211	0.082	11.294	0.431	1.358	0	0	0	69.653		60.085	40.311	70.937	56.079	81.41	159.694	149.88	101.962	152	61.979	94.203	79.87		1	1	1	1	1	2	2	2	2	2	2	1		4	2	2	2	2	3	3	3	3
45	wt%	0.002	0.234	0.165	0.022	0	36.4528	0.45	0	0.056	0	0	57.45		60.085	40.311	70.937	56.079	81.41	159.694	149.88	101.962	152	61.979	94.203	79.87		1	1	1	1	1	2	2	2	2	2	2	1		4	2	2	2	2	3	3	3	3
46	wt%	0	0.211	0.424	0.017	0.063	35.4114	0.427	0	0.023	0	0	58.549		60.085	40.311	70.937	56.079	81.41	159.694	149.88	101.962	152	61.979	94.203	79.87		1	1	1	1	1	2	2	2	2	2	2	1		4	2	2	2	2	3	3	3	3
47	wt%	0	0.337	0.181	0.027	0.015	23.4039	0.519	0	0.01	0	0	71.878		60.085	40.311	70.937	56.079	81.41	159.694	149.88	101.962	152	61.979	94.203	79.87		1	1	1	1	1	2	2	2	2	2	2	1		4	2	2	2	2	3	3	3	3
48	wt%	0	0.26	0.156	0	0	13.7647	0.624	0	0.006	0	0	82.727		60.085	40.311	70.937	56.079	81.41	159.694	149.88	101.962	152	61.979	94.203	79.87		1	1	1	1	1	2	2	2	2	2	2	1		4	2	2	2	2	3	3	3	3
49	wt%	0	0.567	0.289	0.022		33.2433		0.223	0.038	0	0	63.663		60.085	40.311	70.937	56.079	81.41	159.694	149.88	101.962	152	61.979	94.203	79.87		1	1	1	1	1	2	2	2	2	2	2	1		4	2	2	2	2	3	3	3	3
50	wt%	0	1.046	0.693	0.01		31.6113		0.23	0	0	0	64.722		60.085	40.311	70.937	56.079	81.41	159.694	149.88	101.962	152	61.979	94.203	79.87		1	1	1	1	1	2	2	2	2	2	2	1		4	2	2	2	2	3	3	3	3
51	wt%	0.008	0.626	0.5	0.004		25.9396		0.177	0.002	0	0	69.551		60.085	40.311	70.937	56.079	81.41	159.694	149.88	101.962	152	61.979	94.203	79.87		1	1	1	1	1	2	2	2	2	2	2	1		4	2	2	2	2	3	3	3	3
52	wt%	0	1.26	0.275	0.022		34.8287		0.191	0.001	0	0	62.227		60.085	40.311	70.937	56.079	81.41	159.694	149.88	101.962	152	61.979	94.203	79.87		1	1	1	1	1	2	2	2	2	2	2	1		4	2	2	2	2	3	3	3	3
53	wt%	0	0.96	0.2	0.03		26.5829		0.171	0.016	0	0	70.069		60.085	40.311	70.937	56.079	81.41	159.694	149.88	101.962	152	61.979	94.203	79.87		1	1	1	1	1	2	2	2	2	2	2	1		4	2	2	2	2	3	3	3	3
54	wt%	0.006	1.345	0.305	0.005		26.7351		0.169	0	0	0	70.374		60.085	40.311	70.937	56.079	81.41	159.694	149.88	101.962	152	61.979	94.203	79.87		1	1	1	1	1	2	2	2	2	2	2	1		4	2	2	2	2	3	3	3	3
55	wt%	0.002	0.9	0.232	0.007		18.3571		0.086	0.053	0	0	78.69		60.085	40.311	70.937	56.079	81.41	159.694	149.88	101.962	152	61.979	94.203	79.87		1	1	1	1	1	2	2	2	2	2	2	1		4	2	2	2	2	3	3	3	3
56	wt%	0	0.707	0.201	0.008		15.2218		0.077	0	0	0	82.424		60.085	40.311	70.937	56.079	81.41	159.694	149.88	101.962	152	61.979	94.203	79.87		1	1	1	1	1	2	2	2	2	2	2	1		4	2	2	2	2	3	3	3	3
57	wt%	0.105	0.234	0.892	0.059	0.012	35.048	0.346	0.096	0.099	0	0	59.125		60.085	40.311	70.937	56.079	81.41	159.694	149.88	101.962	152	61.979	94.203	79.87		1	1	1	1	1	2	2	2	2	2	2	1		4	2	2	2	2	3	3	3	3
58	wt%	0.088	0.224	1.088	0.056	0	34.9513	0.28	0.038	0.051	0	0	59.486		60.085	40.311	70.937	56.079	81.41	159.694	149.88	101.962	152	61.979	94.203	79.87		1	1	1	1	1	2	2	2	2	2	2	1		4	2	2	2	2	3	3	3	3
59	wt%	0.141	0.206	0.963	0.081	0.029	34.2878	0.337	0.096	0	0	0	59.842		60.085	40.311	70.937	56.079	81.41	159.694	149.88	101.962	152	61.979	94.203	79.87		1	1	1	1	1	2	2	2	2	2	2	1		4	2	2	2	2	3	3	3	3
60	wt%	0.16	0.066	1.211	0.055	0.037	33.0697	0.437	0.246	0.07	0	0	60.145		60.085	40.311	70.937	56.079	81.41	159.694	149.88	101.962	152	61.979	94.203	79.87		1	1	1	1	1	2	2	2	2	2	2	1		4	2	2	2	2	3	3	3	3
61	wt%	0.154	0.081	1.262	0.039	0.054	33.3809	0.43	0.21	0.06	0	0	60.304		60.085	40.311	70.937	56.079	81.41	159.694	149.88	101.962	152	61.979	94.203	79.87		1	1	1	1	1	2	2	2	2	2	2	1		4	2	2	2	2	3	3	3	3
62	wt%	0.169	0.095	1.388	0.06	0	32.6818	0.385	0.181	0.042	0	0	60.376		60.085	40.311	70.937	56.079	81.41	159.694	149.88	101.962	152	61.979	94.203	79.87		1	1	1	1	1	2	2	2	2	2	2	1		4	2	2	2	2	3	3	3	3
63	wt%	0.458	0.111	1.885	0.063	0.073	35.7604	0.513	0.338	0.194	0	0	55.553		60.085	40.311	70.937	56.079	81.41	159.694	149.88	101.962	152	61.979	94.203	79.87		1	1	1	1	1	2	2	2	2	2	2	1		4	2	2	2	2	3	3	3	3
64	wt%	0.098	0.053	1.85	0.052	0	36.1761	0.48	0.096	0.237	0	0	57.997		60.085	40.311	70.937	56.079	81.41	159.694	149.88	101.962	152	61.979	94.203	79.87		1	1	1	1	1	2	2	2	2	2	2	1		4	2	2	2	2	3	3	3	3
65	wt%	0.145	0.081	1.786	0.081	0.131	35.0002	0.508	0.102	0.262	0	0	58.2		60.085	40.311	70.937	56.079	81.41	159.694	149.88	101.962	152	61.979	94.203	79.87		1	1	1	1	1	2	2	2	2	2	2	1		4	2	2	2	2	3	3	3	3
66	wt%														60.085	40.311	70.937	56.079	81.41	159.694	149.88	101.962	152	61.979	94.203	79.87		1	1	1	1	1	2	2	2	2	2	2	1		4	2	2	2	2	3	3	3	3
67	wt%														60.085	40.311	70.937	56.079	81.41	159.694	149.88	101.962	152	61.979	94.203	79.87		1	1	1	1	1	2	2	2	2	2	2	1		4	2	2	2	2	3	3	3	3
68	wt%														60.085	40.311	70.937	56.079	81.41	159.694	149.88	101.962	152	61.979	94.203	79.87		1	1	1	1	1	2	2	2	2	2	2	1		4	2	2	2	2	3	3	3	3
69	wt%														60.085	40.311	70.937	56.079	81.41	159.694	149.88	101.962	152	61.979	94.203	79.87		1	1	1	1	1	2	2	2	2	2	2	1		4	2	2	2	2	3	3	3	3
70	wt%														60.085	40.311	70.937	56.079	81.41	159.694	149.88	101.962	152	61.979	94.203	79.87		1	1	1	1	1	2	2	2	2	2	2	1		4	2	2	2	2	3	3	3	3
71	wt%														60.085	40.311	70.937	56.079	81.41	159.694	149.88	101.962	152	61.979	94.203	79.87		1	1	1	1	1	2	2	2	2	2	2	1		4	2	2	2	2	3	3	3	3
72	wt%														60.085	40.311	70.937	56.079	81.41	159.694	149.88	101.962	152	61.979	94.203	79.87		1	1	1	1	1	2	2	2	2	2	2	1		4	2	2	2	2	3	3	3	3
73	wt%														60.085	40.311	70.937	56.079	81.41	159.694	149.88	101.962	152	61.979	94.203	79.87		1	1	1	1	1	2	2	2	2	2	2	1		4	2	2	2	2	3	3	3	3
74	wt%														60.085	40.311	70.937	56.079	81.41	159.694	149.88	101.962	152	61.979	94.203	79.87		1	1	1	1	1	2	2	2	2	2	2	1		4	2	2	2	2	3	3	3	3
75	wt%														60.085	40.311	70.937	56.079	81.41	159.694	149.88	101.962	152	61.979	94.203	79.87		1	1	1	1	1	2	2	2	2	2	2	1		4	2	2	2	2	3	3	3	3
76	wt%														60.085	40.311	70.937	56.079	81.41	159.694	149.88	101.962	152	61.979	94.203	79.87		1	1	1	1	1	2	2	2	2	2	2	1		4	2	2	2	2	3	3	3	3
77	wt%														60.085	40.311	70.937	56.079	81.41	159.694	149.88	101.962	152	61.979	94.203	79.87		1	1	1	1	1	2	2	2	2	2	2	1		4	2	2	2	2	3	3	3	3
78	wt%														60.085	40.311	70.937	56.079	81.41	159.694	149.88	101.962	152	61.979	94.203	79.87		1	1	1	1	1	2	2	2	2	2	2	1		4	2	2	2	2	3	3	3	3
79	wt%														60.085	40.311	70.937	56.079	81.41	159.694	149.88	101.962	152	61.979	94.203	79.87		1	1	1	1	1	2	2	2	2	2	2	1		4	2	2	2	2	3	3	3	3
80	wt%														60.085	40.311	70.937	56.079	81.41	159.694	149.88	101.962	152	61.979	94.203	79.87		1	1	1	1	1	2	2	2	2	2	2	1		4	2	2	2	2	3	3	3	3
81	wt%														60.085	40.311	70.937	56.079	81.41	159.694	149.88	101.962	152	61.979	94.203	79.87		1	1	1	1	1	2	2	2	2	2	2	1		4	2	2	2	2	3	3	3	3
82	wt%														60.085	40.311	70.937	56.079	81.41	159.694	149.88	101.962	152	61.979	94.203	79.87		1	1	1	1	1	2	2	2	2	2	2	1		4	2	2	2	2	3	3	3	3
83	wt%														60.085	40.311	70.937	56.079	81.41	159.694	149.88	101.962	152	61.979	94.203	79.87		1	1	1	1	1	2	2	2	2	2	2	1		4	2	2	2	2	3	3	3	3
84	wt%														60.085	40.311	70.937	56.079	81.41	159.694	149.88	101.962	152	61.979	94.203	79.87		1	1	1	1	1	2	2	2	2	2	2	1		4	2	2	2	2	3	3	3	3
85	wt%														60.085	40.311	70.937	56.079	81.41	159.694	149.88	101.962	152	61.979	94.203	79.87		1	1	1	1	1	2	2	2	2	2	2	1		4	2	2	2	2	3	3	3	3
86	wt%														60.085	40.311	70.937	56.079	81.41	159.694	149.88	101.962	152	61.979	94.203	79.87		1	1	1	1	1	2	2	2	2	2	2	1		4	2	2	2	2	3	3	3	3
87	wt%														60.085	40.311	70.937	56.079	81.41	159.694	149.88	101.962	152	61.979	94.203	79.87		1	1	1	1	1	2	2	2	2	2	2	1		4	2	2	2	2	3	3	3	3
88	wt%														60.085	40.311	70.937	56.079	81.41	159.694	149.88	101.962	152	61.979	94.203	79.87		1	1	1	1	1	2	2	2	2	2	2	1		4	2	2	2	2	3	3	3	3
89	wt%														60.085	40.311	70.937	56.079	81.41	159.694	149.88	101.962	152	61.979	94.203	79.87		1	1	1	1	1	2	2	2	2	2	2	1		4	2	2	2	2	3	3	3	3
90	wt%														60.085	40.311	70.937	56.079	81.41	159.694	149.88	101.962	152	61.979	94.203	79.87		1	1	1	1	1	2	2	2	2	2	2	1		4	2	2	2	2	3	3	3	3
91	wt%														60.085	40.311	70.937	56.079	81.41	159.694	149.88	101.962	152	61.979	94.203	79.87		1	1	1	1	1	2	2	2	2	2	2	1		4	2	2	2	2	3	3	3	3
92	wt%														60.085	40.311	70.937	56.079	81.41	159.694	149.88	101.962	152	61.979	94.203	79.87		1	1	1	1	1	2	2	2	2	2	2	1		4	2	2	2	2	3	3	3	3
93	wt%														60.085	40.311	70.937	56.079	81.41	159.694	149.88	101.962	152	61.979	94.203	79.87		1	1	1	1	1	2	2	2	2	2	2	1		4	2	2	2	2	3	3	3	3
94	wt%														60.085	40.311	70.937	56.079	81.41	159.694	149.88	101.962	152	61.979	94.203	79.87		1	1	1	1	1	2	2	2	2	2	2	1		4	2	2	2	2	3	3	3	3
95	wt%														60.085	40.311	70.937	56.079	81.41	159.694	149.88	101.962	152	61.979	94.203	79.87		1	1	1	1	1	2	2	2	2	2	2	1		4	2	2	2	2	3	3	3	3
96	wt%														60.085	40.311	70.937	56.079	81.41	159.694	149.88	101.962	152	61.979	94.203	79.87		1	1	1	1	1	2	2	2	2	2	2	1		4	2	2	2	2	3	3	3	3
97	wt%														60.085	40.311	70.937	56.079	81.41	159.694	149.88	101.962	152	61.979	94.203	79.87		1	1	1	1	1	2	2	2	2	2	2	1		4	2	2	2	2	3	3	3	3
98	wt%														60.085	40.311	70.937	56.079	81.41	159.694	149.88	101.962	152	61.979	94.203	79.87		1	1	1	1	1	2	2	2	2	2	2	1		4	2	2	2	2	3	3	3	3
99	wt%														60.085	40.311	70.937	56.079	81.41	159.694	149.88	101.962	152	61.979	94.203	79.87		1	1	1	1	1	2	2	2	2	2	2	1		4	2	2	2	2	3	3	3	3
100	wt%														60.085	40.311	70.937	56.079	81.41	159.694	149.88	101.962	152	61.979	94.203	79.87		1	1	1	1	1	2	2	2	2	2	2	1		4	2	2	2	2	3	3	3	3
101	wt%														60.085	40.311	70.937	56.079	81.41	159.694	149.88	101.962	152	61.979	94.203	79.87		1	1	1	1	1	2	2	2	2	2	2	1		4	2	2	2	2	3	3	3	3
102	wt%														60.085	40.311	70.937	56.079	81.41	159.694	149.88	101.962	152	61.979	94.203	79.87		1	1	1	1	1	2	2	2	2	2	2	1		4	2	2	2	2	3	3	3	3
103	wt%														60.085	40.311	70.937	56.079	81.41	159.694	149.88	101.962	152	61.979	94.203	79.87		1	1	1	1	1	2	2	2	2	2	2	1		4	2	2	2	2	3	3	3	3
104	wt%														60.085	40.311	70.937	56.079	81.41	159.694	149.88	101.962	152	61.979	94.203	79.87		1	1	1	1	1	2	2	2	2	2	2	1		4	2	2	2	2	3	3	3	3
105	wt%														60.085	40.311	70.937	56.079	81.41	159.694	149.88	101.962	152	61.979	94.203	79.87		1	1	1	1	1	2	2	2	2	2	2	1		4	2	2	2	2	3	3	3	3
106	wt%														60.085	40.311	70.937	56.079	81.41	159.694	149.88	101.962	152	61.979	94.203	79.87		1	1	1	1	1	2	2	2	2	2	2	1		4	2	2	2	2	3	3	3	3
107	wt%														60.085	40.311	70.937	56.079	81.41	159.694	149.88	101.962	152	61.979	94.203	79.87		1	1	1	1	1	2	2	2	2	2	2	1		4	2	2	2	2	3	3	3	3
108	wt%														60.085	40.311	70.937	56.079	81.41	159.694	149.88	101.962	152	61.979	94.203	79.87		1	1	1	1	1	2	2	2	2	2	2	1		4	2	2	2	2	3	3	3	3
109	wt%														60.085	40.311	70.937	56.079	81.41	159.694	149.88	101.962	152	61.979	94.203	79.87		1	1	1	1	1	2	2	2	2	2	2	1		4	2	2	2	2	3	3	3	3
110	wt%														60.085	40.311	70.937	56.079	81.41	159.694	149.88	101.962	152	61.979	94.203	79.87		1	1	1	1	1	2	2	2	2	2	2	1		4	2	2	2	2	3	3	3	3
111	wt%														60.085	40.311	70.937	56.079	81.41	159.694	149.88	101.962	152	61.979	94.203	79.87		1	1	1	1	1	2	2	2	2	2	2	1		4	2	2	2	2	3	3	3	3
112	wt%														60.085	40.311	70.937	56.079	81.41	159.694	149.88	101.962	152	61.979	94.203	79.87		1	1	1	1	1	2	2	2	2	2	2	1		4	2	2	2	2	3	3	3	3
113	wt%														60.085	40.311	70.937	56.079	81.41	159.694	149.88	101.962	152	61.979	94.203	79.87		1	1	1	1	1	2	2	2	2	2	2	1		4	2	2	2	2	3	3	3	3
114	wt%														60.085	40.311	70.937	56.079	81.41	159.694	149.88	101.962	152	61.979	94.203	79.87		1	1	1	1	1	2	2	2	2	2	2	1		4	2	2	2	2	3	3	3	3
115	wt%														60.085	40.311	70.937	56.079	81.41	159.694	149.88	101.962	152	61.979	94.203	79.87		1	1	1	1	1	2	2	2	2	2	2	1		4	2	2	2	2	3	3	3	3
116	wt%														60.085	40.311	70.937	56.079	81.41	159.694	149.88	101.962	152	61.979	94.203	79.87		1	1	1	1	1	2	2	2	2	2	2	1		4	2	2	2	2	3	3	3	3
117	wt%														60.085	40.311	70.937	56.079	81.41	159.694	149.88	101.962	152	61.979	94.203	79.87		1	1	1	1	1	2	2	2	2	2	2	1		4	2	2	2	2	3	3	3	3
118	wt%														60.085	40.311	70.937	56.079	81.41	159.694	149.88	101.962	152	61.979	94.203	79.87		1	1	1	1	1	2	2	2	2	2	2	1		4	2	2	2	2	3	3	3	3
119	wt%														60.085	40.311	70.937	56.079	81.41	159.694	149.88	101.962	152	61.979	94.203	79.87		1	1	1	1	1	2	2	2	2	2	2	1		4	2	2	2	2	3	3	3	3
120	wt%														60.085	40.311	70.937	56.079	81.41	159.694	149.88	101.962	152	61.979	94.203	79.87		1	1	1	1	1	2	2	2	2	2	2	1		4	2	2	2	2	3	3	3	3
121	wt%														60.085	40.311	70.937	56.079	81.41	159.694	149.88	101.962	152	61.979	94.203	79.87		1	1	1	1	1	2	2	2	2	2	2	1		4	2	2	2	2	3	3	3	3
122	wt%														60.085	40.311	70.937	56.079	81.41	159.694	149.88	101.962	152	61.979	94.203	79.87		1	1	1	1	1	2	2	2	2	2	2	1		4	2	2	2	2	3	3	3	3
123	wt%														60.085	40.311	70.937	56.079	81.41	159.694	149.88	101.962	152	61.979	94.203	79.87		1	1	1	1	1	2	2	2	2	2	2	1		4	2	2	2	2	3	3	3	3
124	wt%														60.085	40.311	70.937	56.079	81.41	159.694	149.88	101.962	152	61.979	94.203	79.87		1	1	1	1	1	2	2	2	2	2	2	1		4	2	2	2	2	3	3	3	3
125	wt%														60.085	40.311	70.937	56.079	81.41	159.694	149.88	101.962	152	61.979	94.203	79.87		1	1	1	1	1	2	2	2	2	2	2	1		4	2	2	2	2	3	3	3	3
126	wt%														60.085	40.311	70.937	56.079	81.41	159.694	149.88	101.962	152	61.979	94.203	79.87		1	1	1	1	1	2	2	2	2	2	2	1		4	2	2	2	2	3	3	3	3
127	wt%														60.085	40.311	70.937	56.079	81.41	159.694	149.88	101.962	152	61.979	94.203	79.87		1	1	1	1	1	2	2	2	2	2	2	1		4	2	2	2	2	3	3	3	3
128	wt%														60.085	40.311	70.937	56.079	81.41	159.694	149.88	101.962	152	61.979	94.203	79.87		1	1	1	1	1	2	2	2	2	2	2	1		4	2	2	2	2	3	3	3	3
129	wt%														60.085	40.311	70.937	56.079	81.41	159.694	149.88	101.962	152	61.979	94.203	79.87		1	1	1	1	1	2	2	2	2	2	2	1		4	2	2	2	2	3	3	3	3
130	wt%														60.085	40.311	70.937	56.079	81.41	159.694	149.88	101.962	152	61.979	94.203	79.87		1	1	1	1	1	2	2	2	2	2	2	1		4	2	2	2	2	3	3	3	3
131	wt%														60.085	40.311	70.937	56.079	81.41	159.694	149.88	101.962	152	61.979	94.203	79.87		1	1	1	1	1	2	2	2	2	2	2	1		4	2	2	2	2	3	3	3	3
132	wt%														60.085	40.311	70.937	56.079	81.41	159.694	149.88	101.962	152	61.979	94.203	79.87		1	1	1	1	1	2	2	2	2	2	2	1		4	2	2	2	2	3	3	3	3
133	wt%														60.085	40.311	70.937	56.079	81.41	159.694	149.88	101.962	152	61.979	94.203	79.87		1	1	1	1	1	2	2	2	2	2	2	1		4	2	2	2	2	3	3	3	3
134	wt%														60.085	40.311	70.937	56.079	81.41	159.694	149.88	101.962	152	61.979	94.203	79.87		1	1	1	1	1	2	2	2	2	2	2	1		4	2	2	2	2	3	3	3	3
135	wt%														60.085	40.311	70.937	56.079	81.41	159.694	149.88	101.962	152	61.979	94.203	79.87		1	1	1	1	1	2	2	2	2	2	2	1		4	2	2	2	2	3	3	3	3
136	wt%														60.085	40.311	70.937	56.079	81.41	159.694	149.88	101.962	152	61.979	94.203	79.87		1	1	1	1	1	2	2	2	2	2	2	1		4	2	2	2	2	3	3	3	3
137	wt%														60.085	40.311	70.937	56.079	81.41	159.694	149.88	101.962	152	61.979	94.203	79.87		1	1	1	1	1	2	2	2	2	2	2	1		4	2	2	2	2	3	3	3	3
138	wt%														60.085	40.311	70.937	56.079	81.41	159.694	149.88	101.962	152	61.979	94.203	79.87		1	1	1	1	1	2	2	2	2	2	2	1		4	2	2	2	2	3	3	3	3
139	wt%														60.085	40.311	70.937	56.079	81.41	159.694	149.88	101.962	152	61.979	94.203	79.87		1	1	1	1	1	2	2	2	2	2	2	1		4	2	2	2	2	3	3	3	3
140	wt%														60.085	40.311	70.937	56.079	81.41	159.694	149.88	101.962	152	61.979	94.203	79.87		1	1	1	1	1	2	2	2	2	2	2	1		4	2	2	2	2	3	3	3	3
141	wt%														60.085	40.311	70.937	56.079	81.41	159.694	149.88	101.962	152	61.979	94.203	79.87		1	1	1	1	1	2	2	2	2	2	2	1		4	2	2	2	2	3	3	3	3
142	wt%														60.085	40.311	70.937	56.079	81.41	159.694	149.88	101.962	152	61.979	94.203	79.87		1	1	1	1	1	2	2	2	2	2	2	1		4	2	2	2	2	3	3	3	3
143	wt%														60.085	40.311	70.937	56.079	81.41	159.694	149.88	101.962	152	61.979	94.203	79.87		1	1	1	1	1	2	2	2	2	2	2	1		4	2	2	2	2	3	3	3	3
144	wt%														60.085	40.311	70.937	56.079	81.41	159.694	149.88	101.962	152	61.979	94.203	79.87		1	1	1	1	1	2	2	2	2	2	2	1		4	2	2	2	2	3	3	3	3
145	wt%														60.085	40.311	70.937	56.079	81.41	159.694	149.88	101.962	152	61.979	94.203	79.87		1	1	1	1	1	2	2	2	2	2	2	1		4	2	2	2	2	3	3	3	3
146	wt%														60.085	40.311	70.937	56.079	81.41	159.694	149.88	101.962	152	61.979	94.203	79.87		1	1	1	1	1	2	2	2	2	2	2	1		4	2	2	2	2	3	3	3	3
147	wt%														60.085	40.311	70.937	56.079	81.41	159.694	149.88	101.962	152	61.979	94.203	79.87		1	1	1	1	1	2	2	2	2	2	2	1		4	2	2	2	2	3	3	3	3
148	wt%														60.085	40.311	70.937	56.079	81.41	159.694	149.88	101.962	152	61.979	94.203	79.87		1	1	1	1	1	2	2	2	2	2	2	1		4	2	2	2	2	3	3	3	3
149	wt%														60.085	40.311	70.937	56.079	81.41	159.694	149.88	101.962	152	61.979	94.203	79.87		1	1	1	1	1	2	2	2	2	2	2	1		4	2	2	2	2	3	3	3	3
150	wt%														60.085	40.311	70.937	56.079	81.41	159.694	149.88	101.962	152	61.979	94.203	79.87		1	1	1	1	1	2	2	2	2	2	2	1		4	2	2	2	2	3	3	3	3
151	wt%														60.085	40.311	70.937	56.079	81.41	159.694	149.88	101.962	152	61.979	94.203	79.87		1	1	1	1	1	2	2	2	2	2	2	1		4	2	2	2	2	3	3	3	3
152	wt%														60.085	40.311	70.937	56.079	81.41	159.694	149.88	101.962	152	61.979	94.203	79.87		1	1	1	1	1	2	2	2	2	2	2	1		4	2	2	2	2	3	3	3	3
153	wt%														60.085	40.311	70.937	56.079	81.41	159.694	149.88	101.962	152	61.979	94.203	79.87		1	1	1	1	1	2	2	2	2	2	2	1		4	2	2	2	2	3	3	3	3
154	wt%														60.085	40.311	70.937	56.079	81.41	159.694	149.88	101.962	152	61.979	94.203	79.87		1	1	1	1	1	2	2	2	2	2	2	1		4	2	2	2	2	3	3	3	3
155	wt%														60.085	40.311	70.937	56.079	81.41	159.694	149.88	101.962	152	61.979	94.203	79.87		1	1	1	1	1	2	2	2	2	2	2	1		4	2	2	2	2	3	3	3	3
156	wt%														60.085	40.311	70.937	56.079	81.41	159.694	149.88	101.962	152	61.979	94.203	79.87		1	1	1	1	1	2	2	2	2	2	2	1		4	2	2	2	2	3	3	3	3
157	wt%														60.085	40.311	70.937	56.079	81.41	159.694	149.88	101.962	152	61.979	94.203	79.87		1	1	1	1	1	2	2	2	2	2	2	1		4	2	2	2	2	3	3	3	3
158	wt%														60.085	40.311	70.937	56.079	81.41	159.694	149.88	101.962	152	61.979	94.203	79.87		1	1	1	1	1	2	2	2	2	2	2	1		4	2	2	2	2	3	3	3	3
159	wt%														60.085	40.311	70.937	56.079	81.41	159.694	149.88	101.962	152	61.979	94.203	79.87		1	1	1	1	1	2	2	2	2	2	2	1		4	2	2	2	2	3	3	3	3
160	wt%														60.085	40.311	70.937	56.079	81.41	159.694	149.88	101.962	152	61.979	94.203	79.87		1	1	1	1	1	2	2	2	2	2	2	1		4	2	2	2	2	3	3	3	3
161	wt%														60.085	40.311	70.937	56.079	81.41	159.694	149.88	101.962	152	61.979	94.203	79.87		1	1	1	1	1	2	2	2	2	2	2	1		4	2	2	2	2	3	3	3	3
162	wt%														60.085	40.311	70.937	56.079	81.41	159.694	149.88	101.962	152	61.979	94.203	79.87		1	1	1	1	1	2	2	2	2	2	2	1		4	2	2	2	2	3	3	3	3
163	wt%														60.085	40.311	70.937	56.079	81.41	159.694	149.88	101.962	152	61.979	94.203	79.87		1	1	1	1	1	2	2	2	2	2	2	1		4	2	2	2	2	3	3	3	3
164	wt%														60.085	40.311	70.937	56.079	81.41	159.694	149.88	101.962	152	61.979	94.203	79.87		1	1	1	1	1	2	2	2	2	2	2	1		4	2	2	2	2	3	3	3	3
165	wt%														60.085	40.311	70.937	56.079	81.41	159.694	149.88	101.962	152	61.979	94.203	79.87		1	1	1	1	1	2	2	2	2	2	2	1		4	2	2	2	2	3	3	3	3
166	wt%														60.085	40.311	70.937	56.079	81.41	159.694	149.88	101.962	152	61.979	94.203	79.87		1	1	1	1	1	2	2	2	2	2	2	1		4	2	2	2	2	3	3	3	3
167	wt%														60.085	40.311	70.937	56.079	81.41	159.694	149.88	101.962	152	61.979	94.203	79.87		1	1	1	1	1	2	2	2	2	2	2	1		4	2	2	2	2	3	3	3	3
168	wt%														60.085	40.311	70.937	56.079	81.41	159.694	149.88	101.962	152	61.979	94.203	79.87		1	1	1	1	1	2	2	2	2	2	2	1		4	2	2	2	2	3	3	3	3
169	wt%														60.085	40.311	70.937	56.079	81.41	159.694	149.88	101.962	152	61.979	94.203	79.87		1	1	1	1	1	2	2	2	2	2	2	1		4	2	2	2	2	3	3	3	3
170	wt%														60.085	40.311	70.937	56.079	81.41	159.694	149.88	101.962	152	61.979	94.203	79.87		1	1	1	1	1	2	2	2	2	2	2	1		4	2	2	2	2	3	3	3	3
171	wt%														60.085	40.311	70.937	56.079	81.41	159.694	149.88	101.962	152	61.979	94.203	79.87		1	1	1	1	1	2	2	2	2	2	2	1		4	2	2	2	2	3	3	3	3
172	wt%														60.085	40.311	70.937	56.079	81.41	159.694	149.88	101.962	152	61.979	94.203	79.87		1	1	1	1	1	2	2	2	2	2	2	1		4	2	2	2	2	3	3	3	3
173	wt%														60.085	40.311	70.937	56.079	81.41	159.694	149.88	101.962	152	61.979	94.203	79.87		1	1	1	1	1	2	2	2	2	2	2	1		4	2	2	2	2	3	3	3	3
174	wt%														60.085	40.311	70.937	56.079	81.41	159.694	149.88	101.962	152	61.979	94.203	79.87		1	1	1	1	1	2	2	2	2	2	2	1		4	2	2	2	2	3	3	3	3
175	wt%														60.085	40.311	70.937	56.079	81.41	159.694	149.88	101.962	152	61.979	94.203	79.87		1	1	1	1	1	2	2	2	2	2	2	1		4	2	2	2	2	3	3	3	3
176	wt%														60.085	40.311	70.937	56.079	81.41	159.694	149.88	101.962	152	61.979	94.203	79.87		1	1	1	1	1	2	2	2	2	2	2	1		4	2	2	2	2	3	3	3	3
177	wt%														60.085	40.311	70.937	56.079	81.41	159.694	149.88	101.962	152	61.979	94.203	79.87		1	1	1	1	1	2	2	2	2	2	2	1		4	2	2	2	2	3	3	3	3
178	wt%														60.085	40.311	70.937	56.079	81.41	159.694	149.88	101.962	152	61.979	94.203	79.87		1	1	1	1	1	2	2	2	2	2	2	1		4	2	2	2	2	3	3	3	3
179	wt%														60.085	40.311	70.937	56.079	81.41	159.694	149.88	101.962	152	61.979	94.203	79.87		1	1	1	1	1	2	2	2	2	2	2	1		4	2	2	2	2	3	3	3	3
180	wt%														60.085	40.311	70.937	56.079	81.41	159.694	149.88	101.962	152	61.979	94.203	79.87		1	1	1	1	1	2	2	2	2	2	2	1		4	2	2	2	2	3	3	3	3
181	wt%														60.085	40.311	70.937	56.079	81.41	159.694	149.88	101.962	152	61.979	94.203	79.87		1	1	1	1	1	2	2	2	2	2	2	1		4	2	2	2	2	3	3	3	3
182	wt%														60.085	40.311	70.937	56.079	81.41	159.694	149.88	101.962	152	61.979	94.203	79.87		1	1	1	1	1	2	2	2	2	2	2	1		4	2	2	2	2	3	3	3	3
183	wt%														60.085	40.311	70.937	56.079	81.41	159.694	149.88	101.962	152	61.979	94.203	79.87		1	1	1	1	1	2	2	2	2	2	2	1		4	2	2	2	2	3	3	3	3
184	wt%														60.085	40.311	70.937	56.079	81.41	159.694	149.88	101.962	152	61.979	94.203	79.87		1	1	1	1	1	2	2	2	2	2	2	1		4	2	2	2	2	3	3	3	3
185	wt%														60.085	40.311	70.937	56.079	81.41	159.694	149.88	101.962	152	61.979	94.203	79.87		1	1	1	1	1	2	2	2	2	2	2	1		4	2	2	2	2	3	3	3	3
186	wt%														60.085	40.311	70.937	56.079	81.41	159.694	149.88	101.962	152	61.979	94.203	79.87		1	1	1	1	1	2	2	2	2	2	2	1		4	2	2	2	2	3	3	3	3
187	wt%														60.085	40.311	70.937	56.079	81.41	159.694	149.88	101.962	152	61.979	94.203	79.87		1	1	1	1	1	2	2	2	2	2	2	1		4	2	2	2	2	3	3	3	3
188	wt%														60.085	40.311	70.937	56.079	81.41	159.694	149.88	101.962	152	61.979	94.203	79.87		1	1	1	1	1	2	2	2	2	2	2	1		4	2	2	2	2	3	3	3	3
189	wt%														60.085	40.311	70.937	56.079	81.41	159.694	149.88	101.962	152	61.979	94.203	79.87		1	1	1	1	1	2	2	2	2	2	2	1		4	2	2	2	2	3	3	3	3
190	wt%														60.085	40.311	70.937	56.079	81.41	159.694	149.88	101.962	152	61.979	94.203	79.87		1	1	1	1	1	2	2	2	2	2	2	1		4	2	2	2	2	3	3	3	3
191	wt%														60.085	40.311	70.937	56.079	81.41	159.694	149.88	101.962	152	61.979	94.203	79.87		1	1	1	1	1	2	2	2	2	2	2	1		4	2	2	2	2	3	3	3	3
192	wt%														60.085	40.311	70.937	56.079	81.41	159.694	149.88	101.962	152	61.979	94.203	79.87		1	1	1	1	1	2	2	2	2	2	2	1		4	2	2	2	2	3	3	3	3
193	wt%														60.085	40.311	70.937	56.079	81.41	159.694	149.88	101.962	152	61.979	94.203	79.87		1	1	1	1	1	2	2	2	2	2	2	1		4	2	2	2	2	3	3	3	3
194	wt%														60.085	40.311	70.937	56.079	81.41	159.694	149.88	101.962	152	61.979	94.203	79.87		1	1	1	1	1	2	2	2	2	2	2	1		4	2	2	2	2	3	3	3	3
195	wt%														60.085	40.311	70.937	56.079	81.41	159.694	149.88	101.962	152	61.979	94.203	79.87		1	1	1	1	1	2	2	2	2	2	2	1		4	2	2	2	2	3	3	3	3
196	wt%														60.085	40.311	70.937	56.079	81.41	159.694	149.88	101.962	152	61.979	94.203	79.87		1	1	1	1	1	2	2	2	2	2	2	1		4	2	2	2	2	3	3	3	3
197	wt%														60.085	40.311	70.937	56.079	81.41	159.694	149.88	101.962	152	61.979	94.203	79.87		1	1	1	1	1	2	2	2	2	2	2	1		4	2	2	2	2	3	3	3	3
198	wt%														60.085	40.311	70.937	56.079	81.41	159.694	149.88	101.962	152	61.979	94.203	79.87		1	1	1	1	1	2	2	2	2	2	2	1		4	2	2	2	2	3	3	3	3
199	wt%														60.085	40.311	70.937	56.079	81.41	159.694	149.88	101.962	152	61.979	94.203	79.87		1	1	1	1	1	2	2	2	2	2	2	1		4	2	2	2	2	3	3	3	3
200	wt%														60.085	40.311	70.937	56.079	81.41	159.694	149.88	101.962	152	61.979	94.203	79.87		1	1	1	1	1	2	2	2	2	2	2	1		4	2	2	2	2	3	3	3	3
201	wt%														60.085	40.311	70.937	56.079	81.41	159.694	149.88	101.962	152	61.979	94.203	79.87		1	1	1	1	1	2	2	2	2	2	2	1		4	2	2	2	2	3	3	3	3
202	wt%														60.085	40.311	70.937	56.079	81.41	159.694	149.88	101.962	152	61.979	94.203	79.87		1	1	1	1	1	2	2	2	2	2	2	1		4	2	2	2	2	3	3	3	3
203	wt%														60.085	40.311	70.937	56.079	81.41	159.694	149.88	101.962	152	61.979	94.203	79.87		1	1	1	1	1	2	2	2	2	2	2	1		4	2	2	2	2	3	3	3	3
204	wt%														60.085	40.311	70.937	56.079	81.41	159.694	149.88	101.962	152	61.979	94.203	79.87		1	1	1	1	1	2	2	2	2	2	2	1		4	2	2	2	2	3	3	3	3
205	wt%														60.085	40.311	70.937	56.079	81.41	159.694	149.88	101.962	152	61.979	94.203	79.87		1	1	1	1	1	2	2	2	2	2	2	1		4	2	2	2	2	3	3	3	3
206	wt%														60.085	40.311	70.937	56.079	81.41	159.694	149.88	101.962	152	61.979	94.203	79.87		1	1	1	1	1	2	2	2	2	2	2	1		4	2	2	2	2	3	3	3	3
207	wt%														60.085	40.311	70.937	56.079	81.41	159.694	149.88	101.962	152	61.979	94.203	79.87		1	1	1	1	1	2	2	2	2	2	2	1		4	2	2	2	2	3	3	3	3
208	wt%														60.085	40.311	70.937	56.079	81.41	159.694	149.88	101.962	152	61.979	94.203	79.87		1	1	1	1	1	2	2	2	2	2	2	1		4	2	2	2	2	3	3	3	3
209	wt%														60.085	40.311	70.937	56.079	81.41	159.694	149.88	101.962	152	61.979	94.203	79.87		1	1	1	1	1	2	2	2	2	2	2	1		4	2	2	2	2	3	3	3	3
210	wt%														60.085	40.311	70.937	56.079	81.41	159.694	149.88	101.962	152	61.979	94.203	79.87		1	1	1	1	1	2	2	2	2	2	2	1		4	2	2	2	2	3	3	3	3
211	wt%														60.085	40.311	70.937	56.079	81.41	159.694	149.88	101.962	152	61.979	94.203	79.87		1	1	1	1	1	2	2	2	2	2	2	1		4	2	2	2	2	3	3	3	3
212	wt%														60.085	40.311	70.937	56.079	81.41	159.694	149.88	101.962	152	61.979	94.203	79.87		1	1	1	1	1	2	2	2	2	2	2	1		4	2	2	2	2	3	3	3	3
213	wt%														60.085	40.311	70.937	56.079	81.41	159.694	149.88	101.962	152	61.979	94.203	79.87		1	1	1	1	1	2	2	2	2	2	2	1		4	2	2	2	2	3	3	3	3
214	wt%														60.085	40.311	70.937	56.079	81.41	159.694	149.88	101.962	152	61.979	94.203	79.87		1	1	1	1	1	2	2	2	2	2	2	1		4	2	2	2	2	3	3	3	3
215	wt%														60.085	40.311	70.937	56.079	81.41	159.694	149.88	101.962	152	61.979	94.203	79.87		1	1	1	1	1	2	2	2	2	2	2	1		4	2	2	2	2	3	3	3	3
216	wt%														60.085	40.311	70.937	56.079	81.41	159.694	149.88	101.962	152	61.979	94.203	79.87		1	1	1	1	1	2	2	2	2	2	2	1		4	2	2	2	2	3	3	3	3
217	wt%														60.085	40.311	70.937	56.079	81.41	159.694	149.88	101.962	152	61.979	94.203	79.87		1	1	1	1	1	2	2	2	2	2	2	1		4	2	2	2	2	3	3	3	3
218	wt%														60.085	40.311	70.937	56.079	81.41	159.694	149.88	101.962	152	61.979	94.203	79.87		1	1	1	1	1	2	2	2	2	2	2	1		4	2	2	2	2	3	3	3	3
219	wt%														60.085	40.311	70.937	56.079	81.41	159.694	149.88	101.962	152	61.979	94.203	79.87		1	1	1	1	1	2	2	2	2	2	2	1		4	2	2	2	2	3	3	3	3
220	wt%														60.085	40.311	70.937	56.079	81.41	159.694	149.88	101.962	152	61.979	94.203	79.87		1	1	1	1	1	2	2	2	2	2	2	1		4	2	2	2	2	3	3	3	3
221	wt%														60.085	40.311	70.937	56.079	81.41	159.694	149.88	101.962	152	61.979	94.203	79.87		1	1	1	1	1	2	2	2	2	2	2	1		4	2	2	2	2	3	3	3	3
222	wt%														60.085	40.311	70.937	56.079	81.41	159.694	149.88	101.962	152	61.979	94.203	79.87		1	1	1	1	1	2	2	2	2	2	2	1		4	2	2	2	2	3	3	3	3
223	wt%														60.085	40.311	70.937	56.079	81.41	159.694	149.88	101.962	152	61.979	94.203	79.87		1	1	1	1	1	2	2	2	2	2	2	1		4	2	2	2	2	3	3	3	3
224	wt%														60.085	40.311	70.937	56.079	81.41	159.694	149.88	101.962	152	61.979	94.203	79.87		1	1	1	1	1	2	2	2	2	2	2	1		4	2	2	2	2	3	3	3	3
225	wt%														60.085	40.311	70.937	56.079	81.41	159.694	149.88	101.962	152	61.979	94.203	79.87		1	1	1	1	1	2	2	2	2	2	2	1		4	2	2	2	2	3	3	3	3
226	wt%														60.085	40.311	70.937	56.079	81.41	159.694	149.88	101.962	152	61.979	94.203	79.87		1	1	1	1	1	2	2	2	2	2	2	1		4	2	2	2	2	3	3	3	3
227	wt%														60.085	40.311	70.937	56.079	81.41	159.694	149.88	101.962	152	61.979	94.203	79.87		1	1	1	1	1	2	2	2	2	2	2	1		4	2	2	2	2	3	3	3	3
228	wt%														60.085	40.311	70.937	56.079	81.41	159.694	149.88	101.962	152	61.979	94.203	79.87		1	1	1	1	1	2	2	2	2	2	2	1		4	2	2	2	2	3	3	3	3
229	wt%														60.085	40.311	70.937	56.079	81.41	159.694	149.88	101.962	152	61.979	94.203	79.87		1	1	1	1	1	2	2	2	2	2	2	1		4	2	2	2	2	3	3	3	3
230	wt%														60.085	40.311	70.937	56.079	81.41	159.694	149.88	101.962	152	61.979	94.203	79.87		1	1	1	1	1	2	2	2	2	2	2	1		4	2	2	2	2	3	3	3	3
231	wt%														60.085	40.311	70.937	56.079	81.41	159.694	149.88	101.962	152	61.979	94.203	79.87		1	1	1	1	1	2	2	2	2	2	2	1		4	2	2	2	2	3	3	3	3
232	wt%														60.085	40.311	70.937	56.079	81.41	159.694	149.88	101.962	152	61.979	94.203	79.87		1	1	1	1	1	2	2	2	2	2	2	1		4	2	2	2	2	3	3	3	3
233	wt%														60.085	40.311	70.937	56.079	81.41	159.694	149.88	101.962	152	61.979	94.203	79.87		1	1	1	1	1	2	2	2	2	2	2	1		4	2	2	2	2	3	3	3	3
234	wt%														60.085	40.311	70.937	56.079	81.41	159.694	149.88	101.962	152	61.979	94.203	79.87		1	1	1	1	1	2	2	2	2	2	2	1		4	2	2	2	2	3	3	3	3
235	wt%														60.085	40.311	70.937	56.079	81.41	159.694	149.88	101.962	152	61.979	94.203	79.87		1	1	1	1	1	2	2	2	2	2	2	1		4	2	2	2	2	3	3	3	3
236	wt%														60.085	40.311	70.937	56.079	81.41	159.694	149.88	101.962	152	61.979	94.203	79.87		1	1	1	1	1	2	2	2	2	2	2	1		4	2	2	2	2	3	3	3	3
237	wt%														60.085	40.311	70.937	56.079	81.41	159.694	149.88	101.962	152	61.979	94.203	79.87		1	1	1	1	1	2	2	2	2	2	2	1		4	2	2	2	2	3	3	3	3
238	wt%														60.085	40.311	70.937	56.079	81.41	159.694	149.88	101.962	152	61.979	94.203	79.87		1	1	1	1	1	2	2	2	2	2	2	1		4	2	2	2	2	3	3	3	3
239	wt%														60.085	40.311	70.937	56.079	81.41	159.694	149.88	101.962	152	61.979	94.203	79.87		1	1	1	1	1	2	2	2	2	2	2	1		4	2	2	2	2	3	3	3	3
240	wt%														60.085	40.311	70.937	56.079	81.41	159.694	149.88	101.962	152	61.979	94.203	79.87		1	1	1	1	1	2	2	2	2	2	2	1		4	2	2	2	2	3	3	3	3
241	wt%														60.085	40.311	70.937	56.079	81.41	159.694	149.88	101.962	152	61.979	94.203	79.87		1	1	1	1	1	2	2	2	2	2	2	1		4	2	2	2	2	3	3	3	3
242	wt%														60.085	40.311	70.937	56.079	81.41	159.694	149.88	101.962	152	61.979	94.203	79.87		1	1	1	1	1	2	2	2	2	2	2	1		4	2	2	2	2	3	3	3	3
243	wt%														60.085	40.311	70.937	56.079	81.41	159.694	149.88	101.962	152	61.979	94.203	79.87		1	1	1	1	1	2	2	2	2	2	2	1		4	2	2	2	2	3	3	3	3
244	wt%														60.085	40.311	70.937	56.079	81.41	159.694	149.88	101.962	152	61.979	94.203	79.87		1	1	1	1	1	2	2	2	2	2	2	1		4	2	2	2	2	3	3	3	3
245	wt%														60.085	40.311	70.937	56.079	81.41	159.694	149.88	101.962	152	61.979	94.203	79.87		1	1	1	1	1	2	2	2	2	2	2	1		4	2	2	2	2	3	3	3	3
246	wt%														60.085	40.311	70.937	56.079	81.41	159.694	149.88	101.962	152	61.979	94.203	79.87		1	1	1	1	1	2	2	2	2	2	2	1		4	2	2	2	2	3	3	3	3
247	wt%														60.085	40.311	70.937	56.079	81.41	159.694	149.88	101.962	152	61.979	94.203	79.87		1	1	1	1	1	2	2	2	2	2	2	1		4	2	2	2	2	3	3	3	3
248	wt%														60.085	40.311	70.937	56.079	81.41	159.694	149.88	101.962	152	61.979	94.203	79.87		1	1	1	1	1	2	2	2	2	2	2	1		4	2	2	2	2	3	3	3	3
249	wt%														60.085	40.311	70.937	56.079	81.41	159.694	149.88	101.962	152	61.979	94.203	79.87		1	1	1	1	1	2	2	2	2	2	2	1		4	2	2	2	2	3	3	3	3
250	wt%														60.085	40.311	70.937	56.079	81.41	159.694	149.88	101.962	152	61.979	94.203	79.87		1	1	1	1	1	2	2	2	2	2	2	1		4	2	2	2	2	3	3	3	3
251	wt%														60.085	40.311	70.937	56.079	81.41	159.694	149.88	101.962	152	61.979	94.203	79.87		1	1	1	1	1	2	2	2	2	2	2	1		4	2	2	2	2	3	3	3	3
252	wt%														60.085	40.311	70.937	56.079	81.41	159.694	149.88	101.962	152	61.979	94.203	79.87		1	1	1	1	1	2	2	2	2	2	2	1		4	2	2	2	2	3	3	3	3
253	wt%														60.085	40.311	70.937	56.079	81.41	159.694	149.88	101.962	152	61.979	94.203	79.87		1	1	1	1	1	2	2	2	2	2	2	1		4	2	2	2	2	3	3	3	3
254	wt%														60.085	40.311	70.937	56.079	81.41	159.694	149.88	101.962	152	61.979	94.203	79.87		1	1	1	1	1	2	2	2	2	2	2	1		4	2	2	2	2	3	3	3	3
255	wt%														60.085	40.311	70.937	56.079	81.41	159.694	149.88	101.962	152	61.979	94.203	79.87		1	1	1	1	1	2	2	2	2	2	2	1		4	2	2	2	2	3	3	3	3
256	wt%														60.085	40.311	70.937	56.079	81.41	159.694	149.88	101.962	152	61.979	94.203	79.87		1	1	1	1	1	2	2	2	2	2	2	1		4	2	2	2	2	3	3	3	3
257	wt%														60.085	40.311	70.937	56.079	81.41	159.694	149.88	101.962	152	61.979	94.203	79.87		1	1	1	1	1	2	2	2	2	2	2	1		4	2	2	2	2	3	3	3	3
258	wt%														60.085	40.311	70.937	56.079	81.41	159.694	149.88	101.962	152	61.979	94.203	79.87		1	1	1	1	1	2	2	2	2	2	2	1		4	2	2	2	2	3	3	3	3
259	wt%														60.085	40.311	70.937	56.079	81.41	159.694	149.88	101.962	152	61.979	94.203	79.87		1	1	1	1	1	2	2	2	2	2	2	1		4	2	2	2	2	3	3	3	3
260	wt%														60.085	40.311	70.937	56.079	81.41	159.694	149.88	101.962	152	61.979	94.203	79.87		1	1	1	1	1	2	2	2	2	2	2	1		4	2	2	2	2	3	3	3	3
261	wt%														60.085	40.311	70.937	56.079	81.41	159.694	149.88	101.962	152	61.979	94.203	79.87		1	1	1	1	1	2	2	2	2	2	2	1		4	2	2	2	2	3	3	3	3
262	wt%														60.085	40.311	70.937	56.079	81.41	159.694	149.88	101.962	152	61.979	94.203	79.87		1	1	1	1	1	2	2	2	2	2	2	1		4	2	2	2	2	3	3	3	3
263	wt%														60.085	40.311	70.937	56.079	81.41	159.694	149.88	101.962	152	61.979	94.203	79.87		1	1	1	1	1	2	2	2	2	2	2	1		4	2	2	2	2	3	3	3	3
264	wt%														60.085	40.311	70.937	56.079	81.41	159.694	149.88	101.962	152	61.979	94.203	79.87		1	1	1	1	1	2	2	2	2	2	2	1		4	2	2	2	2	3	3	3	3
265	wt%														60.085	40.311	70.937	56.079	81.41	159.694	149.88	101.962	152	61.979	94.203	79.87		1	1	1	1	1	2	2	2	2	2	2	1		4	2	2	2	2	3	3	3	3
266	wt%														60.085	40.311	70.937	56.079	81.41	159.694	149.88	101.962	152	61.979	94.203	79.87		1	1	1	1	1	2	2	2	2	2	2	1		4	2	2	2	2	3	3	3	3
267	wt%														60.085	40.311	70.937	56.079	81.41	159.694	149.88	101.962	152	61.979	94.203	79.87		1	1	1	1	1	2	2	2	2	2	2	1		4	2	2	2	2	3	3	3	3
268	wt%														60.085	40.311	70.937	56.079	81.41	159.694	149.88	101.962	152	61.979	94.203	79.87		1	1	1	1	1	2	2	2	2	2	2	1		4	2	2	2	2	3	3	3	3
269	wt%														60.085	40.311	70.937	56.079	81.41	159.694	149.88	101.962	152	61.979	94.203	79.87		1	1	1	1	1	2	2	2	2	2	2	1		4	2	2	2	2	3	3	3	3
270	wt%														60.085	40.311	70.937	56.079	81.41	159.694	149.88	101.962	152	61.979	94.203	79.87		1	1	1	1	1	2	2	2	2	2	2	1		4	2	2	2	2	3	3	3	3
271	wt%														60.085	40.311	70.937	56.079	81.41	159.694	149.88	101.962	152	61.979	94.203	79.87		1	1	1	1	1	2	2	2	2	2	2	1		4	2	2	2	2	3	3	3	3
272	wt%														60.085	40.311	70.937	56.079	81.41	159.694	149.88	101.962	152	61.979	94.203	79.87		1	1	1	1	1	2	2	2	2	2	2	1		4	2	2	2	2	3	3	3	3
273	wt%														60.085	40.311	70.937	56.079	81.41	159.694	149.88	101.962	152	61.979	94.203	79.87		1	1	1	1	1	2	2	2	2	2	2	1		4	2	2	2	2	3	3	3	3
274	wt%														60.085	40.311	70.937	56.079	81.41	159.694	149.88	101.962	152	61.979	94.203	79.87		1	1	1	1	1	2	2	2	2	2	2	1		4	2	2	2	2	3	3	3	3
275	wt%														60.085	40.311	70.937	56.079	81.41	159.694	149.88	101.962	152	61.979	94.203	79.87		1	1	1	1	1	2	2	2	2	2	2	1		4	2	2	2	2	3	3	3	3
276	wt%														60.085	40.311	70.937	56.079	81.41	159.694	149.88	101.962	152	61.979	94.203	79.87		1	1	1	1	1	2	2	2	2	2	2	1		4	2	2	2	2	3	3	3	3
277	wt%														60.085	40.311	70.937	56.079	81.41	159.694	149.88	101.962	152	61.979	94.203	79.87		1	1	1	1	1	2	2	2	2	2	2	1		4	2	2	2	2	3	3	3	3
278	wt%														60.085	40.311	70.937	56.079	81.41	159.694	149.88	101.962	152	61.979	94.203	79.87		1	1	1	1	1	2	2	2	2	2	2	1		4	2	2	2	2	3	3	3	3
279	wt%														60.085	40.311	70.937	56.079	81.41	159.694	149.88	101.962	152	61.979	94.203	79.87		1	1	1	1	1	2	2	2	2	2	2	1		4	2	2	2	2	3	3	3	3
280	wt%														60.085	40.311	70.937	56.079	81.41	159.694	149.88	101.962	152	61.979	94.203	79.87		1	1	1	1	1	2	2	2	2	2	2	1		4	2	2	2	2	3	3	3	3
281	wt%														60.085	40.311	70.937	56.079	81.41	159.694	149.88	101.962	152	61.979	94.203	79.87		1	1	1	1	1	2	2	2	2	2	2	1		4	2	2	2	2	3	3	3	3
282	wt%														60.085	40.311	70.937	56.079	81.41	159.694	149.88	101.962	152	61.979	94.203	79.87		1	1	1	1	1	2	2	2	2	2	2	1		4	2	2	2	2	3	3	3	3
283	wt%														60.085	40.311	70.937	56.079	81.41	159.694	149.88	101.962	152	61.979	94.203	79.87		1	1	1	1	1	2	2	2	2	2	2	1		4	2	2	2	2	3	3	3	3
284	wt%														60.085	40.311	70.937	56.079	81.41	159.694	149.88	101.962	152	61.979	94.203	79.87		1	1	1	1	1	2	2	2	2	2	2	1		4	2	2	2	2	3	3	3	3
285	wt%														60.085	40.311	70.937	56.079	81.41	159.694	149.88	101.962	152	61.979	94.203	79.87		1	1	1	1	1	2	2	2	2	2	2	1		4	2	2	2	2	3	3	3	3
286	wt%														60.085	40.311	70.937	56.079	81.41	159.694	149.88	101.962	152	61.979	94.203	79.87		1	1	1	1	1	2	2	2	2	2	2	1		4	2	2	2	2	3	3	3	3
287	wt%														60.085	40.311	70.937	56.079	81.41	159.694	149.88	101.962	152	61.979	94.203	79.87		1	1	1	1	1	2	2	2	2	2	2	1		4	2	2	2	2	3	3	3	3
288	wt%														60.085	40.311	70.937	56.079	81.41	159.694	149.88	101.962	152	61.979	94.203	79.87		1	1	1	1	1	2	2	2	2	2	2	1		4	2	2	2	2	3	3	3	3
289	wt%														60.085	40.311	70.937	56.079	81.41	159.694	149.88	101.962	152	61.979	94.203	79.87		1	1	1	1	1	2	2	2	2	2	2	1		4	2	2	2	2	3	3	3	3
290	wt%														60.085	40.311	70.937	56.079	81.41	159.694	149.88	101.962	152	61.979	94.203	79.87		1	1	1	1	1	2	2	2	2	2	2	1		4	2	2	2	2	3	3	3	3
291	wt%														60.085	40.311	70.937	56.079	81.41	159.694	149.88	101.962	152	61.979	94.203	79.87		1	1	1	1	1	2	2	2	2	2	2	1		4	2	2	2	2	3	3	3	3
292	wt%														60.085	40.311	70.937	56.079	81.41	159.694	149.88	101.962	152	61.979	94.203	79.87		1	1	1	1	1	2	2	2	2	2	2	1		4	2	2	2	2	3	3	3	3
293	wt%														60.085	40.311	70.937	56.079	81.41	159.694	149.88	101.962	152	61.979	94.203	79.87		1	1	1	1	1	2	2	2	2	2	2	1		4	2	2	2	2	3	3	3	3
294	wt%														60.085	40.311	70.937	56.079	81.41	159.694	149.88	101.962	152	61.979	94.203	79.87		1	1	1	1	1	2	2	2	2	2	2	1		4	2	2	2	2	3	3	3	3
295	wt%														60.085	40.311	70.937	56.079	81.41	159.694	149.88	101.962	152	61.979	94.203	79.87		1	1	1	1	1	2	2	2	2	2	2	1		4	2	2	2	2	3	3	3	3
296	wt%														60.085	40.311	70.937	56.079	81.41	159.694	149.88	101.962	152	61.979	94.203	79.87		1	1	1	1	1	2	2	2	2	2	2	1		4	2	2	2	2	3	3	3	3
297	wt%														60.085	40.311	70.937	56.079	81.41	159.694	149.88	101.962	152	61.979	94.203	79.87		1	1	1	1	1	2	2	2	2	2	2	1		4	2	2	2	2	3	3	3	3
298	wt%														60.085	40.311	70.937	56.079	81.41	159.694	149.88	101.962	152	61.979	94.203	79.87		1	1	1	1	1	2	2	2	2	2	2	1		4	2	2	2	2	3	3	3	3
299	wt%														60.085	40.311	70.937	56.079	81.41	159.694	149.88	101.962	152	61.979	94.203	79.87		1	1	1	1	1	2	2	2	2	2	2	1		4	2	2	2	2	3	3	3	3
300	wt%														60.085	40.311	70.937	56.079	81.41	159.694	149.88	101.962	152	61.979	94.203	79.87		1	1	1	1	1	2	2	2	2	2	2	1		4	2	2	2	2	3	3	3	3
301	wt%														60.085	40.311	70.937	56.079	81.41	159.694	149.88	101.962	152	61.979	94.203	79.87		1	1	1	1	1	2	2	2	2	2	2	1		4	2	2	2	2	3	3	3	3
302	wt%														60.085	40.311	70.937	56.079	81.41	159.694	149.88	101.962	152	61.979	94.203	79.87		1	1	1	1	1	2	2	2	2	2	2	1		4	2	2	2	2	3	3	3	3
303	wt%														60.085	40.311	70.937	56.079	81.41	159.694	149.88	101.962	152	61.979	94.203	79.87		1	1	1	1	1	2	2	2	2	2	2	1		4	2	2	2	2	3	3	3	3
304	wt%														60.085	40.311	70.937	56.079	81.41	159.694	149.88	101.962	152	61.979	94.203	79.87		1	1	1	1	1	2	2	2	2	2	2	1		4	2	2	2	2	3	3	3	3
305	wt%														60.085	40.311	70.937	56.079	81.41	159.694	149.88	101.962	152	61.979	94.203	79.87		1	1	1	1	1	2	2	2	2	2	2	1		4	2	2	2	2	3	3	3	3
306	wt%														60.085	40.311	70.937	56.079	81.41	159.694	149.88	101.962	152	61.979	94.203	79.87		1	1	1	1	1	2	2	2	2	2	2	1		4	2	2	2	2	3	3	3	3
307	wt%														60.085	40.311	70.937	56.079	81.41	159.694	149.88	101.962	152	61.979	94.203	79.87		1	1	1	1	1	2	2	2	2	2	2	1		4	2	2	2	2	3	3	3	3
308	wt%														60.085	40.311	70.937	56.079	81.41	159.694	149.88	101.962	152	61.979	94.203	79.87		1	1	1	1	1	2	2	2	2	2	2	1		4	2	2	2	2	3	3	3	3
309	wt%														60.085	40.311	70.937	56.079	81.41	159.694	149.88	101.962	152	61.979	94.203	79.87		1	1	1	1	1	2	2	2	2	2	2	1		4	2	2	2	2	3	3	3	3
310	wt%														60.085	40.311	70.937	56.079	81.41	159.694	149.88	101.962	152	61.979	94.203	79.87		1	1	1	1	1	2	2	2	2	2	2	1		4	2	2	2	2	3	3	3	3
311	wt%														60.085	40.311	70.937	56.079	81.41	159.694	149.88	101.962	152	61.979	94.203	79.87		1	1	1	1	1	2	2	2	2	2	2	1		4	2	2	2	2	3	3	3	3
312	wt%														60.085	40.311	70.937	56.079	81.41	159.694	149.88	101.962	152	61.979	94.203	79.87		1	1	1	1	1	2	2	2	2	2	2	1		4	2	2	2	2	3	3	3	3
313	wt%														60.085	40.311	70.937	56.079	81.41	159.694	149.88	101.962	152	61.979	94.203	79.87		1	1	1	1	1	2	2	2	2	2	2	1		4	2	2	2	2	3	3	3	3
314	wt%														60.085	40.311	70.937	56.079	81.41	159.694	149.88	101.962	152	61.979	94.203	79.87		1	1	1	1	1	2	2	2	2	2	2	1		4	2	2	2	2	3	3	3	3
315	wt%														60.085	40.311	70.937	56.079	81.41	159.694	149.88	101.962	152	61.979	94.203	79.87		1	1	1	1	1	2	2	2	2	2	2	1		4	2	2	2	2	3	3	3	3
316	wt%														60.085	40.311	70.937	56.079	81.41	159.694	149.88	101.962	152	61.979	94.203	79.87		1	1	1	1	1	2	2	2	2	2	2	1		4	2	2	2	2	3	3	3	3
317	wt%														60.085	40.311	70.937	56.079	81.41	159.694	149.88	101.962	152	61.979	94.203	79.87		1	1	1	1	1	2	2	2	2	2	2	1		4	2	2	2	2	3	3	3	3
318	wt%														60.085	40.311	70.937	56.079	81.41	159.694	149.88	101.962	152	61.979	94.203	79.87		1	1	1	1	1	2	2	2	2	2	2	1		4	2	2	2	2	3	3	3	3
319	wt%														60.085	40.311	70.937	56.079	81.41	159.694	149.88	101.962	152	61.979	94.203	79.87		1	1	1	1	1	2	2	2	2	2	2	1		4	2	2	2	2	3	3	3	3
320	wt%														60.085	40.311	70.937	56.079	81.41	159.694	149.88	101.962	152	61.979	94.203	79.87		1	1	1	1	1	2	2	2	2	2	2	1		4	2	2	2	2	3	3	3	3
321	wt%														60.085	40.311	70.937	56.079	81.41	159.694	149.88	101.962	152	61.979	94.203	79.87		1	1	1	1	1	2	2	2	2	2	2	1		4	2	2	2	2	3	3	3	3
322	wt%														60.085	40.311	70.937	56.079	81.41	159.694	149.88	101.962	152	61.979	94.203	79.87		1	1	1	1	1	2	2	2	2	2	2	1		4	2	2	2	2	3	3	3	3
323	wt%														60.085	40.311	70.937	56.079	81.41	159.694	149.88	101.962	152	61.979	94.203	79.87		1	1	1	1	1	2	2	2	2	2	2	1		4	2	2	2	2	3	3	3	3
324	wt%														60.085	40.311	70.937	56.079	81.41	159.694	149.88	101.962	152	61.979	94.203	79.87		1	1	1	1	1	2	2	2	2	2	2	1		4	2	2	2	2	3	3	3	3
325	wt%														60.085	40.311	70.937	56.079	81.41	159.694	149.88	101.962	152	61.979	94.203	79.87		1	1	1	1	1	2	2	2	2	2	2	1		4	2	2	2	2	3	3	3	3
326	wt%														60.085	40.311	70.937	56.079	81.41	159.694	149.88	101.962	152	61.979	94.203	79.87		1	1	1	1	1	2	2	2	2	2	2	1		4	2	2	2	2	3	3	3	3
327	wt%														60.085	40.311	70.937	56.079	81.41	159.694	149.88	101.962	152	61.979	94.203	79.87		1	1	1	1	1	2	2	2	2	2	2	1		4	2	2	2	2	3	3	3	3
328	wt%														60.085	40.311	70.937	56.079	81.41	159.694	149.88	101.962	152	61.979	94.203	79.87		1	1	1	1	1	2	2	2	2	2	2	1		4	2	2	2	2	3	3	3	3
329	wt%														60.085	40.311	70.937	56.079	81.41	159.694	149.88	101.962	152	61.979	94.203	79.87		1	1	1	1	1	2	2	2	2	2	2	1		4	2	2	2	2	3	3	3	3
330	wt%														60.085	40.311	70.937	56.079	81.41	159.694	149.88	101.962	152	61.979	94.203	79.87		1	1	1	1	1	2	2	2	2	2	2	1		4	2	2	2	2	3	3	3	3
331	wt%														60.085	40.311	70.937	56.079	81.41	159.694	149.88	101.962	152	61.979	94.203	79.87		1	1	1	1	1	2	2	2	2	2	2	1		4	2	2	2	2	3	3	3	3
332	wt%														60.085	40.311	70.937	56.079	81.41	159.694	149.88	101.962	152	61.979	94.203	79.87		1	1	1	1	1	2	2	2	2	2	2	1		4	2	2	2	2	3	3	3	3
333	wt%														60.085	40.311	70.937	56.079	81.41	159.694	149.88	101.962	152	61.979	94.203	79.87		1	1	1	1	1	2	2	2	2	2	2	1		4	2	2	2	2	3	3	3	3
334	wt%														60.085	40.311	70.937	56.079	81.41	159.694	149.88	101.962	152	61.979	94.203	79.87		1	1	1	1	1	2	2	2	2	2	2	1		4	2	2	2	2	3	3	3	3
335	wt%														60.085	40.311	70.937	56.079	81.41	159.694	149.88	101.962	152	61.979	94.203	79.87		1	1	1	1	1	2	2	2	2	2	2	1		4	2	2	2	2	3	3	3	3
336	wt%														60.085	40.311	70.937	56.079	81.41	159.694	149.88	101.962	152	61.979	94.203	79.87		1	1	1	1	1	2	2	2	2	2	2	1		4	2	2	2	2	3	3	3	3
337	wt%														60.085	40.311	70.937	56.079	81.41	159.694	149.88	101.962	152	61.979	94.203	79.87		1	1	1	1	1	2	2	2	2	2	2	1		4	2	2	2	2	3	3	3	3
338	wt%														60.085	40.311	70.937	56.079	81.41	159.694	149.88	101.962	152	61.979	94.203	79.87		1	1	1	1	1	2	2	2	2	2	2	1		4	2	2	2	2	3	3	3	3
339	wt%														60.085	40.311	70.937	56.079	81.41	159.694	149.88	101.962	152	61.979	94.203	79.87		1	1	1	1	1	2	2	2	2	2	2	1		4	2	2	2	2	3	3	3	3
340	wt%														60.085	40.311	70.937	56.079	81.41	159.694	149.88	101.962	152	61.979	94.203	79.87		1	1	1	1	1	2	2	2	2	2	2	1		4	2	2	2	2	3	3	3	3
341	wt%														60.085	40.311	70.937	56.079	81.41	159.694	149.88	101.962	152	61.979	94.203	79.87		1	1	1	1	1	2	2	2	2	2	2	1		4	2	2	2	2	3	3	3	3
342	wt%														60.085	40.311	70.937	56.079	81.41	159.694	149.88	101.962	152	61.979	94.203	79.87		1	1	1	1	1	2	2	2	2	2	2	1		4	2	2	2	2	3	3	3	3
343	wt%														60.085	40.311	70.937	56.079	81.41	159.694	149.88	101.962	152	61.979	94.203	79.87		1	1	1	1	1	2	2	2	2	2	2	1		4	2	2	2	2	3	3	3	3
344	wt%														60.085	40.311	70.937	56.079	81.41	159.694	149.88	101.962	152	61.979	94.203	79.87		1	1	1	1	1	2	2	2	2	2	2	1		4	2	2	2	2	3	3	3	3
345	wt%														60.085	40.311	70.937	56.079	81.41	159.694	149.88	101.962	152	61.979	94.203	79.87		1	1	1	1	1	2	2	2	2	2	2	1		4	2	2	2	2	3	3	3	3
346	wt%														60.085	40.311	70.937	56.079	81.41	159.694	149.88	101.962	152	61.979	94.203	79.87		1	1	1	1	1	2	2	2	2	2	2	1		4	2	2	2	2	3	3	3	3
347	wt%														60.085	40.311	70.937	56.079	81.41	159.694	149.88	101.962	152	61.979	94.203	79.87		1	1	1	1	1	2	2	2	2	2	2	1		4	2	2	2	2	3	3	3	3
348	wt%														60.085	40.311	70.937	56.079	81.41	159.694	149.88	101.962	152	61.979	94.203	79.87		1	1	1	1	1	2	2	2	2	2	2	1		4	2	2	2	2	3	3	3	3
349	wt%														60.085	40.311	70.937	56.079	81.41	159.694	149.88	101.962	152	61.979	94.203	79.87		1	1	1	1	1	2	2	2	2	2	2	1		4	2	2	2	2	3	3	3	3
350	wt%														60.085	40.311	70.937	56.079	81.41	159.694	149.88	101.962	152	61.979	94.203	79.87		1	1	1	1	1	2	2	2	2	2	2	1		4	2	2	2	2	3	3	3	3
351	wt%														60.085	40.311	70.937	56.079	81.41	159.694	149.88	101.962	152	61.979	94.203	79.87		1	1	1	1	1	2	2	2	2	2	2	1		4	2	2	2	2	3	3	3	3
352	wt%														60.085	40.311	70.937	56.079	81.41	159.694	149.88	101.962	152	61.979	94.203	79.87		1	1	1	1	1	2	2	2	2	2	2	1		4	2	2	2	2	3	3	3	3
353	wt%														60.085	40.311	70.937	56.079	81.41	159.694	149.88	101.962	152	61.979	94.203	79.87		1	1	1	1	1	2	2	2	2	2	2	1		4	2	2	2	2	3	3	3	3
354	wt%														60.085	40.311	70.937	56.079	81.41	159.694	149.88	101.962	152	61.979	94.203	79.87		1	1	1	1	1	2	2	2	2	2	2	1		4	2	2	2	2	3	3	3	3
355	wt%														60.085	40.311	70.937	56.079	81.41	159.694	149.88	101.962	152	61.979	94.203	79.87		1	1	1	1	1	2	2	2	2	2	2	1		4	2	2	2	2	3	3	3	3
356	wt%														60.085	40.311	70.937	56.079	81.41	159.694	149.88	101.962	152	61.979	94.203	79.87		1	1	1	1	1	2	2	2	2	2	2	1		4	2	2	2	2	3	3	3	3
357	wt%														60.085	40.311	70.937	56.079	81.41	159.694	149.88	101.962	152	61.979	94.203	79.87		1	1	1	1	1	2	2	2	2	2	2	1		4	2	2	2	2	3	3	3	3
358	wt%														60.085	40.311	70.937	56.079	81.41	159.694	149.88	101.962	152	61.979	94.203	79.87		1	1	1	1	1	2	2	2	2	2	2	1		4	2	2	2	2	3	3	3	3
359	wt%														60.085	40.311	70.937	56.079	81.41	159.694	149.88	101.962	152	61.979	94.203	79.87		1	1	1	1	1	2	2	2	2	2	2	1		4	2	2	2	2	3	3	3	3
360	wt%														60.085	40.311	70.937	56.079	81.41	159.694	149.88	101.962	152	61.979	94.203	79.87		1	1	1	1	1	2	2	2	2	2	2	1		4	2	2	2	2	3	3	3	3
361	wt%														60.085	40.311	70.937	56.079	81.41	159.694	149.88	101.962	152	61.979	94.203	79.87		1	1	1	1	1	2	2	2	2	2	2	1		4	2	2	2	2	3	3	3	3
362	wt%														60.085	40.311	70.937	56.079	81.41	159.694	149.88	101.962	152	61.979	94.203	79.87		1	1	1	1	1	2	2	2	2	2	2	1		4	2	2	2	2	3	3	3	3
363	wt%														60.085	40.311	70.937	56.079	81.41	159.694	149.88	101.962	152	61.979	94.203	79.87		1	1	1	1	1	2	2	2	2	2	2	1		4	2	2	2	2	3	3	3	3
364	wt%														60.085	40.311	70.937	56.079	81.41	159.694	149.88	101.962	152	61.979	94.203	79.87		1	1	1	1	1	2	2	2	2	2	2	1		4	2	2	2	2	3	3	3	3
365	wt%														60.085	40.311	70.937	56.079	81.41	159.694	149.88	101.962	152	61.979	94.203	79.87		1	1	1	1	1	2	2	2	2	2	2	1		4	2	2	2	2	3	3	3	3
366	wt%														60.085	40.311	70.937	56.079	81.41	159.694	149.88	101.962	152	61.979	94.203	79.87		1	1	1	1	1	2	2	2	2	2	2	1		4	2	2	2	2	3	3	3	3
367	wt%														60.085	40.311	70.937	56.079	81.41	159.694	149.88	101.962	152	61.979	94.203	79.87		1	1	1	1	1	2	2	2	2	2	2	1		4	2	2	2	2	3	3	3	3
368	wt%														60.085	40.311	70.937	56.079	81.41	159.694	149.88	101.962	152	61.979	94.203	79.87		1	1	1	1	1	2	2	2	2	2	2	1		4	2	2	2	2	3	3	3	3
369	wt%														60.085	40.311	70.937	56.079	81.41	159.694	149.88	101.962	152	61.979	94.203	79.87		1	1	1	1	1	2	2	2	2	2	2	1		4	2	2	2	2	3	3	3	3
370	wt%														60.085	40.311	70.937	56.079	81.41	159.694	149.88	101.962	152	61.979	94.203	79.87		1	1	1	1	1	2	2	2	2	2	2	1		4	2	2	2	2	3	3	3	3
371	wt%														60.085	40.311	70.937	56.079	81.41	159.694	149.88	101.962	152	61.979	94.203	79.87		1	1	1	1	1	2	2	2	2	2	2	1		4	2	2	2	2	3	3	3	3
372	wt%														60.085	40.311	70.937	56.079	81.41	159.694	149.88	101.962	152	61.979	94.203	79.87		1	1	1	1	1	2	2	2	2	2	2	1		4	2	2	2	2	3	3	3	3
373	wt%														60.085	40.311	70.937	56.079	81.41	159.694	149.88	101.962	152	61.979	94.203	79.87		1	1	1	1	1	2	2	2	2	2	2	1		4	2	2	2	2	3	3	3	3
374	wt%														60.085	40.311	70.937	56.079	81.41	159.694	149.88	101.962	152	61.979	94.203	79.87		1	1	1	1	1	2	2	2	2	2	2	1		4	2	2	2	2	3	3	3	3
375	wt%														60.085	40.311	70.937	56.079	81.41	159.694	149.88	101.962	152	61.979	94.203	79.87		1	1	1	1	1	2	2	2	2	2	2	1		4	2	2	2	2	3	3	3	3
376	wt%														60.085	40.311	70.937	56.079	81.41	159.694	149.88	101.962	152	61.979	94.203	79.87		1	1	1	1	1	2	2	2	2	2	2	1		4	2	2	2	2	3	3	3	3
377	wt%														60.085	40.311	70.937	56.079	81.41	159.694	149.88	101.962	152	61.979	94.203	79.87		1	1	1	1	1	2	2	2	2	2	2	1		4	2	2	2	2	3	3	3	3
378	wt%														60.085	40.311	70.937	56.079	81.41	159.694	149.88	101.962	152	61.979	94.203	79.87		1	1	1	1	1	2	2	2	2	2	2	1		4	2	2	2	2	3	3	3	3
379	wt%														60.085	40.311	70.937	56.079	81.41	159.694	149.88	101.962	152	61.979	94.203	79.87		1	1	1	1	1	2	2	2	2	2	2	1		4	2	2	2	2	3	3	3	3
380	wt%														60.085	40.311	70.937	56.079	81.41	159.694	149.88	101.962	152	61.979	94.203	79.87		1	1	1	1	1	2	2	2	2	2	2	1		4	2	2	2	2	3	3	3	3
381	wt%														60.085	40.311	70.937	56.079	81.41	159.694	149.88	101.962	152	61.979	94.203	79.87		1	1	1	1	1	2	2	2	2	2	2	1		4	2	2	2	2	3	3	3	3
382	wt%														60.085	40.311	70.937	56.079	81.41	159.694	149.88	101.962	152	61.979	94.203	79.87		1	1	1	1	1	2	2	2	2	2	2	1		4	2	2	2	2	3	3	3	3
383	wt%														60.085	40.311	70.937	56.079	81.41	159.694	149.88	101.962	152	61.979	94.203	79.87		1	1	1	1	1	2	2	2	2	2	2	1		4	2	2	2	2	3	3	3	3
384	wt%														60.085	40.311	70.937	56.079	81.41	159.694	149.88	101.962	152	61.979	94.203	79.87		1	1	1	1	1	2	2	2	2	2	2	1		4	2	2	2	2	3	3	3	3
385	wt%														60.085	40.311	70.937	56.079	81.41	159.694	149.88	101.962	152	61.979	94.203	79.87		1	1	1	1	1	2	2	2	2	2	2	1		4	2	2	2	2	3	3	3	3
386	wt%														60.085	40.311	70.937	56.079	81.41	159.694	149.88	101.962	152	61.979	94.203	79.87		1	1	1	1	1	2	2	2	2	2	2	1		4	2	2	2	2	3	3	3	3
387	wt%														60.085	40.311	70.937	56.079	81.41	159.694	149.88	101.962	152	61.979	94.203	79.87		1	1	1	1	1	2	2	2	2	2	2	1		4	2	2	2	2	3	3	3	3
388	wt%														60.085	40.311	70.937	56.079	81.41	159.694	149.88	101.962	152	61.979	94.203	79.87		1	1	1	1	1	2	2	2	2	2	2	1		4	2	2	2	2	3	3	3	3
389	wt%														60.085	40.311	70.937	56.079	81.41	159.694	149.88	101.962	152	61.979	94.203	79.87		1	1	1	1	1	2	2	2	2	2	2	1		4	2	2	2	2	3	3	3	3
390	wt%														60.085	40.311	70.937	56.079	81.41	159.694	149.88	101.962	152	61.979	94.203	79.87		1	1	1	1	1	2	2	2	2	2	2	1		4	2	2	2	2	3	3	3	3
391	wt%														60.085	40.311	70.937	56.079	81.41	159.694	149.88	101.962	152	61.979	94.203	79.87		1	1	1	1	1	2	2	2	2	2	2	1		4	2	2	2	2	3	3	3	3
392	wt%														60.085	40.311	70.937	56.079	81.41	159.694	149.88	101.962	152	61.979	94.203	79.87		1	1	1	1	1	2	2	2	2	2	2	1		4	2	2	2	2	3	3	3	3
393	wt%														60.085	40.311	70.937	56.079	81.41	159.694	149.88	101.962	152	61.979	94.203	79.87		1	1	1	1	1	2	2	2	2	2	2	1		4	2	2	2	2	3	3	3	3
394	wt%														60.085	40.311	70.937	56.079	81.41	159.694	149.88	101.962	152	61.979	94.203	79.87		1	1	1	1	1	2	2	2	2	2	2	1		4	2	2	2	2	3	3	3	3
395	wt%														60.085	40.311	70.937	56.079	81.41	159.694	149.88	101.962	152	61.979	94.203	79.87		1	1	1	1	1	2	2	2	2	2	2	1		4	2	2	2	2	3	3	3	3
396	wt%														60.085	40.311	70.937	56.079	81.41	159.694	149.88	101.962	152	61.979	94.203	79.87		1	1	1	1	1	2	2	2	2	2	2	1		4	2	2	2	2	3	3	3	3
397	wt%														60.085	40.311	70.937	56.079	81.41	159.694	149.88	101.962	152	61.979	94.203	79.87		1	1	1	1	1	2	2	2	2	2	2	1		4	2	2	2	2	3	3	3	3
398	wt%														60.085	40.311	70.937	56.079	81.41	159.694	149.88	101.962	152	61.979	94.203	79.87		1	1	1	1	1	2	2	2	2	2	2	1		4	2	2	2	2	3	3	3	3
399	wt%														60.085	40.311	70.937	56.079	81.41	159.694	149.88	101.962	152	61.979	94.203	79.87		1	1	1	1	1	2	2	2	2	2	2	1		4	2	2	2	2	3	3	3	3
400	wt%														60.085	40.311	70.937	56.079	81.41	159.694	149.88	101.962	152	61.979	94.203	79.87		1	1	1	1	1	2	2	2	2	2	2	1		4	2	2	2	2	3	3	3	3
401	wt%														60.085	40.311	70.937	56.079	81.41	159.694	149.88	101.962	152	61.979	94.203	79.87		1	1	1	1	1	2	2	2	2	2	2	1		4	2	2	2	2	3	3	3	3
402	wt%														60.085	40.311	70.937	56.079	81.41	159.694	149.88	101.962	152	61.979	94.203	79.87		1	1	1	1	1	2	2	2	2	2	2	1		4	2	2	2	2	3	3	3	3
403	wt%														60.085	40.311	70.937	56.079	81.41	159.694	149.88	101.962	152	61.979	94.203	79.87		1	1	1	1	1	2	2	2	2	2	2	1		4	2	2	2	2	3	3	3	3
404	wt%														60.085	40.311	70.937	56.079	81.41	159.694	149.88	101.962	152	61.979	94.203	79.87		1	1	1	1	1	2	2	2	2	2	2	1		4	2	2	2	2	3	3	3	3
405	wt%														60.085	40.311	70.937	56.079	81.41	159.694	149.88	101.962	152	61.979	94.203	79.87		1	1	1	1	1	2	2	2	2	2	2	1		4	2	2	2	2	3	3	3	3
406	wt%														60.085	40.311	70.937	56.079	81.41	159.694	149.88	101.962	152	61.979	94.203	79.87		1	1	1	1	1	2	2	2	2	2	2	1		4	2	2	2	2	3	3	3	3
407	wt%														60.085	40.311	70.937	56.079	81.41	159.694	149.88	101.962	152	61.979	94.203	79.87		1	1	1	1	1	2	2	2	2	2	2	1		4	2	2	2	2	3	3	3	3
408	wt%														60.085	40.311	70.937	56.079	81.41	159.694	149.88	101.962	152	61.979	94.203	79.87		1	1	1	1	1	2	2	2	2	2	2	1		4	2	2	2	2	3	3	3	3
409	wt%														60.085	40.311	70.937	56.079	81.41	159.694	149.88	101.962	152	61.979	94.203	79.87		1	1	1	1	1	2	2	2	2	2	2	1		4	2	2	2	2	3	3	3	3
410	wt%														60.085	40.311	70.937	56.079	81.41	159.694	149.88	101.962	152	61.979	94.203	79.87		1	1	1	1	1	2	2	2	2	2	2	1		4	2	2	2	2	3	3	3	3
411	wt%														60.085	40.311	70.937	56.079	81.41	159.694	149.88	101.962	152	61.979	94.203	79.87		1	1	1	1	1	2	2	2	2	2	2	1		4	2	2	2	2	3	3	3	3
412	wt%														60.085	40.311	70.937	56.079	81.41	159.694	149.88	101.962	152	61.979	94.203	79.87		1	1	1	1	1	2	2	2	2	2	2	1		4	2	2	2	2	3	3	3	3
413	wt%														60.085	40.311	70.937	56.079	81.41	159.694	149.88	101.962	152	61.979	94.203	79.87		1	1	1	1	1	2	2	2	2	2	2	1		4	2	2	2	2	3	3	3	3
414	wt%														60.085	40.311	70.937	56.079	81.41	159.694	149.88	101.962	152	61.979	94.203	79.87		1	1	1	1	1	2	2	2	2	2	2	1		4	2	2	2	2	3	3	3	3
415	wt%														60.085	40.311	70.937	56.079	81.41	159.694	149.88	101.962	152	61.979	94.203	79.87		1	1	1	1	1	2	2	2	2	2	2	1		4	2	2	2	2	3	3	3	3
416	wt%														60.085	40.311	70.937	56.079	81.41	159.694	149.88	101.962	152	61.979	94.203	79.87		1	1	1	1	1	2	2	2	2	2	2	1		4	2	2	2	2	3	3	3	3
417	wt%														60.085	40.311	70.937	56.079	81.41	159.694	149.88	101.962	152	61.979	94.203	79.87		1	1	1	1	1	2	2	2	2	2	2	1		4	2	2	2	2	3	3	3	3
418	wt%														60.085	40.311	70.937	56.079	81.41	159.694	149.88	101.962	152	61.979	94.203	79.87		1	1	1	1	1	2	2	2	2	2	2	1		4	2	2	2	2	3	3	3	3
419	wt%														60.085	40.311	70.937	56.079	81.41	159.694	149.88	101.962	152	61.979	94.203	79.87		1	1	1	1	1	2	2	2	2	2	2	1		4	2	2	2	2	3	3	3	3
420	wt%														60.085	40.311	70.937	56.079	81.41	159.694	149.88	101.962	152	61.979	94.203	79.87		1	1	1	1	1	2	2	2	2	2	2	1		4	2	2	2	2	3	3	3	3
421	wt%														60.085	40.311	70.937	56.079	81.41	159.694	149.88	101.962	152	61.979	94.203	79.87		1	1	1	1	1	2	2	2	2	2	2	1		4	2	2	2	2	3	3	3	3
422	wt%														60.085	40.311	70.937	56.079	81.41	159.694	149.88	101.962	152	61.979	94.203	79.87		1	1	1	1	1	2	2	2	2	2	2	1		4	2	2	2	2	3	3	3	3
423	wt%														60.085	40.311	70.937	56.079	81.41	159.694	149.88	101.962	152	61.979	94.203	79.87		1	1	1	1	1	2	2	2	2	2	2	1		4	2	2	2	2	3	3	3	3
424	wt%														60.085	40.311	70.937	56.079	81.41	159.694	149.88	101.962	152	61.979	94.203	79.87		1	1	1	1	1	2	2	2	2	2	2	1		4	2	2	2	2	3	3	3	3
425	wt%														60.085	40.311	70.937	56.079	81.41	159.694	149.88	101.962	152	61.979	94.203	79.87		1	1	1	1	1	2	2	2	2	2	2	1		4	2	2	2	2	3	3	3	3
426	wt%														60.085	40.311	70.937	56.079	81.41	159.694	149.88	101.962	152	61.979	94.203	79.87		1	1	1	1	1	2	2	2	2	2	2	1		4	2	2	2	2	3	3	3	3
427	wt%														60.085	40.311	70.937	56.079	81.41	159.694	149.88	101.962	152	61.979	94.203	79.87		1	1	1	1	1	2	2	2	2	2	2	1		4	2	2	2	2	3	3	3	3
428	wt%														60.085	40.311	70.937	56.079	81.41	159.694	149.88	101.962	152	61.979	94.203	79.87		1	1	1	1	1	2	2	2	2	2	2	1		4	2	2	2	2	3	3	3	3
429	wt%														60.085	40.311	70.937	56.079	81.41	159.694	149.88	101.962	152	61.979	94.203	79.87		1	1	1	1	1	2	2	2	2	2	2	1		4	2	2	2	2	3	3	3	3
430	wt%														60.085	40.311	70.937	56.079	81.41	159.694	149.88	101.962	152	61.979	94.203	79.87		1	1	1	1	1	2	2	2	2	2	2	1		4	2	2	2	2	3	3	3	3
431	wt%														60.085	40.311	70.937	56.079	81.41	159.694	149.88	101.962	152	61.979	94.203	79.87		1	1	1	1	1	2	2	2	2	2	2	1		4	2	2	2	2	3	3	3	3
432	wt%														60.085	40.311	70.937	56.079	81.41	159.694	149.88	101.962	152	61.979	94.203	79.87		1	1	1	1	1	2	2	2	2	2	2	1		4	2	2	2	2	3	3	3	3
433	wt%														60.085	40.311	70.937	56.079	81.41	159.694	149.88	101.962	152	61.979	94.203	79.87		1	1	1	1	1	2	2	2	2	2	2	1		4	2	2	2	2	3	3	3	3
434	wt%														60.085	40.311	70.937	56.079	81.41	159.694	149.88	101.962	152	61.979	94.203	79.87		1	1	1	1	1	2	2	2	2	2	2	1		4	2	2	2	2	3	3	3	3
435	wt%														60.085	40.311	70.937	56.079	81.41	159.694	149.88	101.962	152	61.979	94.203	79.87		1	1	1	1	1	2	2	2	2	2	2	1		4	2	2	2	2	3	3	3	3
436	wt%														60.085	40.311	70.937	56.079	81.41	159.694	149.88	101.962	152	61.979	94.203	79.87		1	1	1	1	1	2	2	2	2	2	2	1		4	2	2	2	2	3	3	3	3
437	wt%														60.085	40.311	70.937	56.079	81.41	159.694	149.88	101.962	152	61.979	94.203	79.87		1	1	1	1	1	2	2	2	2	2	2	1		4	2	2	2	2	3	3	3	3
438	wt%														60.085	40.311	70.937	56.079	81.41	159.694	149.88	101.962	152	61.979	94.203	79.87		1	1	1	1	1	2	2	2	2	2	2	1		4	2	2	2	2	3	3	3	3
439	wt%														60.085	40.311	70.937	56.079	81.41	159.694	149.88	101.962	152	61.979	94.203	79.87		1	1	1	1	1	2	2	2	2	2	2	1		4	2	2	2	2	3	3	3	3
440	wt%														60.085	40.311	70.937	56.079	81.41	159.694	149.88	101.962	152	61.979	94.203	79.87		1	1	1	1	1	2	2	2	2	2	2	1		4	2	2	2	2	3	3	3	3
441	wt%														60.085	40.311	70.937	56.079	81.41	159.694	149.88	101.962	152	61.979	94.203	79.87		1	1	1	1	1	2	2	2	2	2	2	1		4	2	2	2	2	3	3	3	3
442	wt%														60.085	40.311	70.937	56.079	81.41	159.694	149.88	101.962	152	61.979	94.203	79.87		1	1	1	1	1	2	2	2	2	2	2	1		4	2	2	2	2	3	3	3	3
443	wt%														60.085	40.311	70.937	56.079	81.41	159.694	149.88	101.962	152	61.979	94.203	79.87		1	1	1	1	1	2	2	2	2	2	2	1		4	2	2	2	2	3	3	3	3
444	wt%														60.085	40.311	70.937	56.079	81.41	159.694	149.88	101.962	152	61.979	94.203	79.87		1	1	1	1	1	2	2	2	2	2	2	1		4	2	2	2	2	3	3	3	3
445	wt%														60.085	40.311	70.937	56.079	81.41	159.694	149.88	101.962	152	61.979	94.203	79.87		1	1	1	1	1	2	2	2	2	2	2	1		4	2	2	2	2	3	3	3	3
446	wt%														60.085	40.311	70.937	56.079	81.41	159.694	149.88	101.962	152	61.979	94.203	79.87		1	1	1	1	1	2	2	2	2	2	2	1		4	2	2	2	2	3	3	3	3
447	wt%														60.085	40.311	70.937	56.079	81.41	159.694	149.88	101.962	152	61.979	94.203	79.87		1	1	1	1	1	2	2	2	2	2	2	1		4	2	2	2	2	3	3	3	3
448	wt%														60.085	40.311	70.937	56.079	81.41	159.694	149.88	101.962	152	61.979	94.203	79.87		1	1	1	1	1	2	2	2	2	2	2	1		4	2	2	2	2	3	3	3	3
449	wt%														60.085	40.311	70.937	56.079	81.41	159.694	149.88	101.962	152	61.979	94.203	79.87		1	1	1	1	1	2	2	2	2	2	2	1		4	2	2	2	2	3	3	3	3
450	wt%														60.085	40.311	70.937	56.079	81.41	159.694	149.88	101.962	152	61.979	94.203	79.87		1	1	1	1	1	2	2	2	2	2	2	1		4	2	2	2	2	3	3	3	3
451	wt%														60.085	40.311	70.937	56.079	81.41	159.694	149.88	101.962	152	61.979	94.203	79.87		1	1	1	1	1	2	2	2	2	2	2	1		4	2	2	2	2	3	3	3	3
452	wt%														60.085	40.311	70.937	56.079	81.41	159.694	149.88	101.962	152	61.979	94.203	79.87		1	1	1	1	1	2	2	2	2	2	2	1		4	2	2	2	2	3	3	3	3
453	wt%														60.085	40.311	70.937	56.079	81.41	159.694	149.88	101.962	152	61.979	94.203	79.87		1	1	1	1	1	2	2	2	2	2	2	1		4	2	2	2	2	3	3	3	3
454	wt%														60.085	40.311	70.937	56.079	81.41	159.694	149.88	101.962	152	61.979	94.203	79.87		1	1	1	1	1	2	2	2	2	2	2	1		4	2	2	2	2	3	3	3	3
455	wt%														60.085	40.311	70.937	56.079	81.41	159.694	149.88	101.962	152	61.979	94.203	79.87		1	1	1	1	1	2	2	2	2	2	2	1		4	2	2	2	2	3	3	3	3
456	wt%														60.085	40.311	70.937	56.079	81.41	159.694	149.88	101.962	152	61.979	94.203	79.87		1	1	1	1	1	2	2	2	2	2	2	1		4	2	2	2	2	3	3	3	3
457	wt%														60.085	40.311	70.937	56.079	81.41	159.694	149.88	101.962	152	61.979	94.203	79.87		1	1	1	1	1	2	2	2	2	2	2	1		4	2	2	2	2	3	3	3	3
458	wt%														60.085	40.311	70.937	56.079	81.41	159.694	149.88	101.962	152	61.979	94.203	79.87		1	1	1	1	1	2	2	2	2	2	2	1		4	2	2	2	2	3	3	3	3
459	wt%														60.085	40.311	70.937	56.079	81.41	159.694	149.88	101.962	152	61.979	94.203	79.87		1	1	1	1	1	2	2	2	2	2	2	1		4	2	2	2	2	3	3	3	3
460	wt%														60.085	40.311	70.937	56.079	81.41	159.694	149.88	101.962	152	61.979	94.203	79.87		1	1	1	1	1	2	2	2	2	2	2	1		4	2	2	2	2	3	3	3	3
461	wt%														60.085	40.311	70.937	56.079	81.41	159.694	149.88	101.962	152	61.979	94.203	79.87		1	1	1	1	1	2	2	2	2	2	2	1		4	2	2	2	2	3	3	3	3
462	wt%														60.085	40.311	70.937	56.079	81.41	159.694	149.88	101.962	152	61.979	94.203	79.87		1	1	1	1	1	2	2	2	2	2	2	1		4	2	2	2	2	3	3	3	3
463	wt%														60.085	40.311	70.937	56.079	81.41	159.694	149.88	101.962	152	61.979	94.203	79.87		1	1	1	1	1	2	2	2	2	2	2	1		4	2	2	2	2	3	3	3	3
464	wt%														60.085	40.311	70.937	56.079	81.41	159.694	149.88	101.962	152	61.979	94.203	79.87		1	1	1	1	1	2	2	2	2	2	2	1		4	2	2	2	2	3	3	3	3
465	wt%														60.085	40.311	70.937	56.079	81.41	159.694	149.88	101.962	152	61.979	94.203	79.87		1	1	1	1	1	2	2	2	2	2	2	1		4	2	2	2	2	3	3	3	3
466	wt%														60.085	40.311	70.937	56.079	81.41	159.694	149.88	101.962	152	61.979	94.203	79.87		1	1	1	1	1	2	2	2	2	2	2	1		4	2	2	2	2	3	3	3	3
467	wt%														60.085	40.311	70.937	56.079	81.41	159.694	149.88	101.962	152	61.979	94.203	79.87		1	1	1	1	1	2	2	2	2	2	2	1		4	2	2	2	2	3	3	3	3
468	wt%														60.085	40.311	70.937	56.079	81.41	159.694	149.88	101.962	152	61.979	94.203	79.87		1	1	1	1	1	2	2	2	2	2	2	1		4	2	2	2	2	3	3	3	3
469	wt%														60.085	40.311	70.937	56.079	81.41	159.694	149.88	101.962	152	61.979	94.203	79.87		1	1	1	1	1	2	2	2	2	2	2	1		4	2	2	2	2	3	3	3	3
470	wt%														60.085	40.311	70.937	56.079	81.41	159.694	149.88	101.962	152	61.979	94.203	79.87		1	1	1	1	1	2	2	2	2	2	2	1		4	2	2	2	2	3	3	3	3
471	wt%														60.085	40.311	70.937	56.079	81.41	159.694	149.88	101.962	152	61.979	94.203	79.87		1	1	1	1	1	2	2	2	2	2	2	1		4	2	2	2	2	3	3	3	3
472	wt%														60.085	40.311	70.937	56.079	81.41	159.694	149.88	101.962	152	61.979	94.203	79.87		1	1	1	1	1	2	2	2	2	2	2	1		4	2	2	2	2	3	3	3	3
473	wt%														60.085	40.311	70.937	56.079	81.41	159.694	149.88	101.962	152	61.979	94.203	79.87		1	1	1	1	1	2	2	2	2	2	2	1		4	2	2	2	2	3	3	3	3
474	wt%														60.085	40.311	70.937	56.079	81.41	159.694	149.88	101.962	152	61.979	94.203	79.87		1	1	1	1	1	2	2	2	2	2	2	1		4	2	2	2	2	3	3	3	3
475	wt%														60.085	40.311	70.937	56.079	81.41	159.694	149.88	101.962	152	61.979	94.203	79.87		1	1	1	1	1	2	2	2	2	2	2	1		4	2	2	2	2	3	3	3	3
476	wt%														60.085	40.311	70.937	56.079	81.41	159.694	149.88	101.962	152	61.979	94.203	79.87		1	1	1	1	1	2	2	2	2	2	2	1		4	2	2	2	2	3	3	3	3
477	wt%														60.085	40.311	70.937	56.079	81.41	159.694	149.88	101.962	152	61.979	94.203	79.87		1	1	1	1	1	2	2	2	2	2	2	1		4	2	2	2	2	3	3	3	3
478	wt%														60.085	40.311	70.937	56.079	81.41	159.694	149.88	101.962	152	61.979	94.203	79.87		1	1	1	1	1	2	2	2	2	2	2	1		4	2	2	2	2	3	3	3	3
479	wt%														60.085	40.311	70.937	56.079	81.41	159.694	149.88	101.962	152	61.979	94.203	79.87		1	1	1	1	1	2	2	2	2	2	2	1		4	2	2	2	2	3	3	3	3
480	wt%														60.085	40.311	70.937	56.079	81.41	159.694	149.88	101.962	152	61.979	94.203	79.87		1	1	1	1	1	2	2	2	2	2	2	1		4	2	2	2	2	3	3	3	3
481	wt%														60.085	40.311	70.937	56.079	81.41	159.694	149.88	101.962	152	61.979	94.203	79.87		1	1	1	1	1	2	2	2	2	2	2	1		4	2	2	2	2	3	3	3	3
482	wt%														60.085	40.311	70.937	56.079	81.41	159.694	149.88	101.962	152	61.979	94.203	79.87		1	1	1	1	1	2	2	2	2	2	2	1		4	2	2	2	2	3	3	3	3
483	wt%														60.085	40.311	70.937	56.079	81.41	159.694	149.88	101.962	152	61.979	94.203	79.87		1	1	1	1	1	2	2	2	2	2	2	1		4	2	2	2	2	3	3	3	3
484	wt%														60.085	40.311	70.937	56.079	81.41	159.694	149.88	101.962	152	61.979	94.203	79.87		1	1	1	1	1	2	2	2	2	2	2	1		4	2	2	2	2	3	3	3	3
485	wt%														60.085	40.311	70.937	56.079	81.41	159.694	149.88	101.962	152	61.979	94.203	79.87		1	1	1	1	1	2	2	2	2	2	2	1		4	2	2	2	2	3	3	3	3
486	wt%														60.085	40.311	70.937	56.079	81.41	159.694	149.88	101.962	152	61.979	94.203	79.87		1	1	1	1	1	2	2	2	2	2	2	1		4	2	2	2	2	3	3	3	3
487	wt%														60.085	40.311	70.937	56.079	81.41	159.694	149.88	101.962	152	61.979	94.203	79.87		1	1	1	1	1	2	2	2	2	2	2	1		4	2	2	2	2	3	3	3	3
488	wt%														60.085	40.311	70.937	56.079	81.41	159.694	149.88	101.962	152	61.979	94.203	79.87		1	1	1	1	1	2	2	2	2	2	2	1		4	2	2	2	2	3	3	3	3
489	wt%														60.085	40.311	70.937	56.079	81.41	159.694	149.88	101.962	152	61.979	94.203	79.87		1	1	1	1	1	2	2	2	2	2	2	1		4	2	2	2	2	3	3	3	3
490	wt%														60.085	40.311	70.937	56.079	81.41	159.694	149.88	101.962	152	61.979	94.203	79.87		1	1	1	1	1	2	2	2	2	2	2	1		4	2	2	2	2	3	3	3	3
491	wt%														60.085	40.311	70.937	56.079	81.41	159.694	149.88	101.962	152	61.979	94.203	79.87		1	1	1	1	1	2	2	2	2	2	2	1		4	2	2	2	2	3	3	3	3
492	wt%														60.085	40.311	70.937	56.079	81.41	159.694	149.88	101.962	152	61.979	94.203	79.87		1	1	1	1	1	2	2	2	2	2	2	1		4	2	2	2	2	3	3	3	3
493	wt%														60.085	40.311	70.937	56.079	81.41	159.694	149.88	101.962	152	61.979	94.203	79.87		1	1	1	1	1	2	2	2	2	2	2	1		4	2	2	2	2	3	3	3	3
494	wt%														60.085	40.311	70.937	56.079	81.41	159.694	149.88	101.962	152	61.979	94.203	79.87		1	1	1	1	1	2	2	2	2	2	2	1		4	2	2	2	2	3	3	3	3
495	wt%														60.085	40.311	70.937	56.079	81.41	159.694	149.88	101.962	152	61.979	94.203	79.87		1	1	1	1	1	2	2	2	2	2	2	1		4	2	2	2	2	3	3	3	3
496	wt%														60.085	40.311	70.937	56.079	81.41	159.694	149.88	101.962	152	61.979	94.203	79.87		1	1	1	1	1	2	2	2	2	2	2	1		4	2	2	2	2	3	3	3	3
497	wt%														60.085	40.311	70.937	56.079	81.41	159.694	149.88	101.962	152	61.979	94.203	79.87		1	1	1	1	1	2	2	2	2	2	2	1		4	2	2	2	2	3	3	3	3
498	wt%														60.085	40.311	70.937	56.079	81.41	159.694	149.88	101.962	152	61.979	94.203	79.87		1	1	1	1	1	2	2	2	2	2	2	1		4	2	2	2	2	3	3	3	3
499	wt%														60.085	40.311	70.937	56.079	81.41	159.694	149.88	101.962	152	61.979	94.203	79.87		1	1	1	1	1	2	2	2	2	2	2	1		4	2	2	2	2	3	3	3	3
500	wt%														60.085	40.311	70.937	56.079	81.41	159.694	149.88	101.962	152	61.979	94.203	79.87		1	1	1	1	1	2	2	2	2	2	2	1		4	2	2	2	2	3	3	3	3
501	wt%														60.085	40.311	70.937	56.079	81.41	159.694	149.88	101.962	152	61.979	94.203	79.87		1	1	1	1	1	2	2	2	2	2	2	1		4	2	2	2	2	3	3	3	3
502	wt%														60.085	40.311	70.937	56.079	81.41	159.694	149.88	101.962	152	61.979	94.203	79.87		1	1	1	1	1	2	2	2	2	2	2	1		4	2	2	2	2	3	3	3	3
503	wt%														60.085	40.311	70.937	56.079	81.41	159.694	149.88	101.962	152	61.979	94.203	79.87		1	1	1	1	1	2	2	2	2	2	2	1		4	2	2	2	2	3	3	3	3
504	wt%														60.085	40.311	70.937	56.079	81.41	159.694	149.88	101.962	152	61.979	94.203	79.87		1	1	1	1	1	2	2	2	2	2	2	1		4	2	2	2	2	3	3	3	3
505	wt%														60.085	40.311	70.937	56.079	81.41	159.694	149.88	101.962	152	61.979	94.203	79.87		1	1	1	1	1	2	2	2	2	2	2	1		4	2	2	2	2	3	3	3	3
506	wt%														60.085	40.311	70.937	56.079	81.41	159.694	149.88	101.962	152	61.979	94.203	79.87		1	1	1	1	1	2	2	2	2	2	2	1		4	2	2	2	2	3	3	3	3
507	wt%														60.085	40.311	70.937	56.079	81.41	159.694	149.88	101.962	152	61.979	94.203	79.87		1	1	1	1	1	2	2	2	2	2	2	1		4	2	2	2	2	3	3	3	3
508	wt%														60.085	40.311	70.937	56.079	81.41	159.694	149.88	101.962	152	61.979	94.203	79.87		1	1	1	1	1	2	2	2	2	2	2	1		4	2	2	2	2	3	3	3	3
509	wt%														60.085	40.311	70.937	56.079	81.41	159.694	149.88	101.962	152	61.979	94.203	79.87		1	1	1	1	1	2	2	2	2	2	2	1		4	2	2	2	2	3	3	3	3
510	wt%														60.085	40.311	70.937	56.079	81.41	159.694	149.88	101.962	152	61.979	94.203	79.87		1	1	1	1	1	2	2	2	2	2	2	1		4	2	2	2	2	3	3	3	3
511	wt%														60.085	40.311	70.937	56.079	81.41	159.694	149.88	101.962	152	61.979	94.203	79.87		1	1	1	1	1	2	2	2	2	2	2	1		4	2	2	2	2	3	3	3	3
512	wt%														60.085	40.311	70.937	56.079	81.41	159.694	149.88	101.962	152	61.979	94.203	79.87		1	1	1	1	1	2	2	2	2	2	2	1		4	2	2	2	2	3	3	3	3
513	wt%														60.085	40.311	70.937	56.079	81.41	159.694	149.88	101.962	152	61.979	94.203	79.87		1	1	1	1	1	2	2	2	2	2	2	1		4	2	2	2	2	3	3	3	3
514	wt%														60.085	40.311	70.937	56.079	81.41	159.694	149.88	101.962	152	61.979	94.203	79.87		1	1	1	1	1	2	2	2	2	2	2	1		4	2	2	2	2	3	3	3	3
515	wt%														60.085	40.311	70.937	56.079	81.41	159.694	149.88	101.962	152	61.979	94.203	79.87		1	1	1	1	1	2	2	2	2	2	2	1		4	2	2	2	2	3	3	3	3
516	wt%														60.085	40.311	70.937	56.079	81.41	159.694	149.88	101.962	152	61.979	94.203	79.87		1	1	1	1	1	2	2	2	2	2	2	1		4	2	2	2	2	3	3	3	3
517	wt%														60.085	40.311	70.937	56.079	81.41	159.694	149.88	101.962	152	61.979	94.203	79.87		1	1	1	1	1	2	2	2	2	2	2	1		4	2	2	2	2	3	3	3	3
518	wt%														60.085	40.311	70.937	56.079	81.41	159.694	149.88	101.962	152	61.979	94.203	79.87		1	1	1	1	1	2	2	2	2	2	2	1		4	2	2	2	2	3	3	3	3
519	wt%														60.085	40.311	70.937	56.079	81.41	159.694	149.88	101.962	152	61.979	94.203	79.87		1	1	1	1	1	2	2	2	2	2	2	1		4	2	2	2	2	3	3	3	3
520	wt%														60.085	40.311	70.937	56.079	81.41	159.694	149.88	101.962	152	61.979	94.203	79.87		1	1	1	1	1	2	2	2	2	2	2	1		4	2	2	2	2	3	3	3	3
521	wt%														60.085	40.311	70.937	56.079	81.41	159.694	149.88	101.962	152	61.979	94.203	79.87		1	1	1	1	1	2	2	2	2	2	2	1		4	2	2	2	2	3	3	3	3
522	wt%														60.085	40.311	70.937	56.079	81.41	159.694	149.88	101.962	152	61.979	94.203	79.87		1	1	1	1	1	2	2	2	2	2	2	1		4	2	2	2	2	3	3	3	3
523	wt%														60.085	40.311	70.937	56.079	81.41	159.694	149.88	101.962	152	61.979	94.203	79.87		1	1	1	1	1	2	2	2	2	2	2	1		4	2	2	2	2	3	3	3	3
524	wt%														60.085	40.311	70.937	56.079	81.41	159.694	149.88	101.962	152	61.979	94.203	79.87		1	1	1	1	1	2	2	2	2	2	2	1		4	2	2	2	2	3	3	3	3
525	wt%														60.085	40.311	70.937	56.079	81.41	159.694	149.88	101.962	152	61.979	94.203	79.87		1	1	1	1	1	2	2	2	2	2	2	1		4	2	2	2	2	3	3	3	3
526	wt%														60.085	40.311	70.937	56.079	81.41	159.694	149.88	101.962	152	61.979	94.203	79.87		1	1	1	1	1	2	2	2	2	2	2	1		4	2	2	2	2	3	3	3	3
527	wt%														60.085	40.311	70.937	56.079	81.41	159.694	149.88	101.962	152	61.979	94.203	79.87		1	1	1	1	1	2	2	2	2	2	2	1		4	2	2	2	2	3	3	3	3
528	wt%														60.085	40.311	70.937	56.079	81.41	159.694	149.88	101.962	152	61.979	94.203	79.87		1	1	1	1	1	2	2	2	2	2	2	1		4	2	2	2	2	3	3	3	3
529	wt%														60.085	40.311	70.937	56.079	81.41	159.694	149.88	101.962	152	61.979	94.203	79.87		1	1	1	1	1	2	2	2	2	2	2	1		4	2	2	2	2	3	3	3	3
530	wt%														60.085	40.311	70.937	56.079	81.41	159.694	149.88	101.962	152	61.979	94.203	79.87		1	1	1	1	1	2	2	2	2	2	2	1		4	2	2	2	2	3	3	3	3
531	wt%														60.085	40.311	70.937	56.079	81.41	159.694	149.88	101.962	152	61.979	94.203	79.87		1	1	1	1	1	2	2	2	2	2	2	1		4	2	2	2	2	3	3	3	3
532	wt%														60.085	40.311	70.937	56.079	81.41	159.694	149.88	101.962	152	61.979	94.203	79.87		1	1	1	1	1	2	2	2	2	2	2	1		4	2	2	2	2	3	3	3	3
533	wt%														60.085	40.311	70.937	56.079	81.41	159.694	149.88	101.962	152	61.979	94.203	79.87		1	1	1	1	1	2	2	2	2	2	2	1		4	2	2	2	2	3	3	3	3
534	wt%														60.085	40.311	70.937	56.079	81.41	159.694	149.88	101.962	152	61.979	94.203	79.87		1	1	1	1	1	2	2	2	2	2	2	1		4	2	2	2	2	3	3	3	3
535	wt%														60.085	40.311	70.937	56.079	81.41	159.694	149.88	101.962	152	61.979	94.203	79.87		1	1	1	1	1	2	2	2	2	2	2	1		4	2	2	2	2	3	3	3	3
536	wt%														60.085	40.311	70.937	56.079	81.41	159.694	149.88	101.962	152	61.979	94.203	79.87		1	1	1	1	1	2	2	2	2	2	2	1		4	2	2	2	2	3	3	3	3
537	wt%														60.085	40.311	70.937	56.079	81.41	159.694	149.88	101.962	152	61.979	94.203	79.87		1	1	1	1	1	2	2	2	2	2	2	1		4	2	2	2	2	3	3	3	3
538	wt%														60.085	40.311	70.937	56.079	81.41	159.694	149.88	101.962	152	61.979	94.203	79.87		1	1	1	1	1	2	2	2	2	2	2	1		4	2	2	2	2	3	3	3	3
539	wt%														60.085	40.311	70.937	56.079	81.41	159.694	149.88	101.962	152	61.979	94.203	79.87		1	1	1	1	1	2	2	2	2	2	2	1		4	2	2	2	2	3	3	3	3
540	wt%														60.085	40.311	70.937	56.079	81.41	159.694	149.88	101.962	152	61.979	94.203	79.87		1	1	1	1	1	2	2	2	2	2	2	1		4	2	2	2	2	3	3	3	3
541	wt%														60.085	40.311	70.937	56.079	81.41	159.694	149.88	101.962	152	61.979	94.203	79.87		1	1	1	1	1	2	2	2	2	2	2	1		4	2	2	2	2	3	3	3	3
542	wt%														60.085	40.311	70.937	56.079	81.41	159.694	149.88	101.962	152	61.979	94.203	79.87		1	1	1	1	1	2	2	2	2	2	2	1		4	2	2	2	2	3	3	3	3
543	wt%														60.085	40.311	70.937	56.079	81.41	159.694	149.88	101.962	152	61.979	94.203	79.87		1	1	1	1	1	2	2	2	2	2	2	1		4	2	2	2	2	3	3	3	3
544	wt%														60.085	40.311	70.937	56.079	81.41	159.694	149.88	101.962	152	61.979	94.203	79.87		1	1	1	1	1	2	2	2	2	2	2	1		4	2	2	2	2	3	3	3	3
545	wt%														60.085	40.311	70.937	56.079	81.41	159.694	149.88	101.962	152	61.979	94.203	79.87		1	1	1	1	1	2	2	2	2	2	2	1		4	2	2	2	2	3	3	3	3
546	wt%														60.085	40.311	70.937	56.079	81.41	159.694	149.88	101.962	152	61.979	94.203	79.87		1	1	1	1	1	2	2	2	2	2	2	1		4	2	2	2	2	3	3	3	3
547	wt%														60.085	40.311	70.937	56.079	81.41	159.694	149.88	101.962	152	61.979	94.203	79.87		1	1	1	1	1	2	2	2	2	2	2	1		4	2	2	2	2	3	3	3	3
548	wt%														60.085	40.311	70.937	56.079	81.41	159.694	149.88	101.962	152	61.979	94.203	79.87		1	1	1	1	1	2	2	2	2	2	2	1		4	2	2	2	2	3	3	3	3
549	wt%														60.085	40.311	70.937	56.079	81.41	159.694	149.88	101.962	152	61.979	94.203	79.87		1	1	1	1	1	2	2	2	2	2	2	1		4	2	2	2	2	3	3	3	3
550	wt%														60.085	40.311	70.937	56.079	81.41	159.694	149.88	101.962	152	61.979	94.203	79.87		1	1	1	1	1	2	2	2	2	2	2	1		4	2	2	2	2	3	3	3	3
551	wt%														60.085	40.311	70.937	56.079	81.41	159.694	149.88	101.962	152	61.979	94.203	79.87		1	1	1	1	1	2	2	2	2	2	2	1		4	2	2	2	2	3	3	3	3
552	wt%														60.085	40.311	70.937	56.079	81.41	159.694	149.88	101.962	152	61.979	94.203	79.87		1	1	1	1	1	2	2	2	2	2	2	1		4	2	2	2	2	3	3	3	3
553	wt%														60.085	40.311	70.937	56.079	81.41	159.694	149.88	101.962	152	61.979	94.203	79.87		1	1	1	1	1	2	2	2	2	2	2	1		4	2	2	2	2	3	3	3	3
554	wt%														60.085	40.311	70.937	56.079	81.41	159.694	149.88	101.962	152	61.979	94.203	79.87		1	1	1	1	1	2	2	2	2	2	2	1		4	2	2	2	2	3	3	3	3
555	wt%														60.085	40.311	70.937	56.079	81.41	159.694	149.88	101.962	152	61.979	94.203	79.87		1	1	1	1	1	2	2	2	2	2	2	1		4	2	2	2	2	3	3	3	3
556	wt%														60.085	40.311	70.937	56.079	81.41	159.694	149.88	101.962	152	61.979	94.203	79.87		1	1	1	1	1	2	2	2	2	2	2	1		4	2	2	2	2	3	3	3	3
557	wt%														60.085	40.311	70.937	56.079	81.41	159.694	149.88	101.962	152	61.979	94.203	79.87		1	1	1	1	1	2	2	2	2	2	2	1		4	2	2	2	2	3	3	3	3
558	wt%														60.085	40.311	70.937	56.079	81.41	159.694	149.88	101.962	152	61.979	94.203	79.87		1	1	1	1	1	2	2	2	2	2	2	1		4	2	2	2	2	3	3	3	3
559	wt%														60.085	40.311	70.937	56.079	81.41	159.694	149.88	101.962	152	61.979	94.203	79.87		1	1	1	1	1	2	2	2	2	2	2	1		4	2	2	2	2	3	3	3	3
560	wt%														60.085	40.311	70.937	56.079	81.41	159.694	149.88	101.962	152	61.979	94.203	79.87		1	1	1	1	1	2	2	2	2	2	2	1		4	2	2	2	2	3	3	3	3
561	wt%														60.085	40.311	70.937	56.079	81.41	159.694	149.88	101.962	152	61.979	94.203	79.87		1	1	1	1	1	2	2	2	2	2	2	1		4	2	2	2	2	3	3	3	3
562	wt%														60.085	40.311	70.937	56.079	81.41	159.694	149.88	101.962	152	61.979	94.203	79.87		1	1	1	1	1	2	2	2	2	2	2	1		4	2	2	2	2	3	3	3	3
563	wt%														60.085	40.311	70.937	56.079	81.41	159.694	149.88	101.962	152	61.979	94.203	79.87		1	1	1	1	1	2	2	2	2	2	2	1		4	2	2	2	2	3	3	3	3
564	wt%														60.085	40.311	70.937	56.079	81.41	159.694	149.88	101.962	152	61.979	94.203	79.87		1	1	1	1	1	2	2	2	2	2	2	1		4	2	2	2	2	3	3	3	3
565	wt%														60.085	40.311	70.937	56.079	81.41	159.694	149.88	101.962	152	61.979	94.203	79.87		1	1	1	1	1	2	2	2	2	2	2	1		4	2	2	2	2	3	3	3	3
566	wt%														60.085	40.311	70.937	56.079	81.41	159.694	149.88	101.962	152	61.979	94.203	79.87		1	1	1	1	1	2	2	2	2	2	2	1		4	2	2	2	2	3	3	3	3
567	wt%														60.085	40.311	70.937	56.079	81.41	159.694	149.88	101.962	152	61.979	94.203	79.87		1	1	1	1	1	2	2	2	2	2	2	1		4	2	2	2	2	3	3	3	3
568	wt%														60.085	40.311	70.937	56.079	81.41	159.694	149.88	101.962	152	61.979	94.203	79.87		1	1	1	1	1	2	2	2	2	2	2	1		4	2	2	2	2	3	3	3	3
569	wt%														60.085	40.311	70.937	56.079	81.41	159.694	149.88	101.962	152	61.979	94.203	79.87		1	1	1	1	1	2	2	2	2	2	2	1		4	2	2	2	2	3	3	3	3
570	wt%														60.085	40.311	70.937	56.079	81.41	159.694	149.88	101.962	152	61.979	94.203	79.87		1	1	1	1	1	2	2	2	2	2	2	1		4	2	2	2	2	3	3	3	3
571	wt%														60.085	40.311	70.937	56.079	81.41	159.694	149.88	101.962	152	61.979	94.203	79.87		1	1	1	1	1	2	2	2	2	2	2	1		4	2	2	2	2	3	3	3	3
572	wt%														60.085	40.311	70.937	56.079	81.41	159.694	149.88	101.962	152	61.979	94.203	79.87		1	1	1	1	1	2	2	2	2	2	2	1		4	2	2	2	2	3	3	3	3
573	wt%														60.085	40.311	70.937	56.079	81.41	159.694	149.88	101.962	152	61.979	94.203	79.87		1	1	1	1	1	2	2	2	2	2	2	1		4	2	2	2	2	3	3	3	3
574	wt%														60.085	40.311	70.937	56.079	81.41	159.694	149.88	101.962	152	61.979	94.203	79.87		1	1	1	1	1	2	2	2	2	2	2	1		4	2	2	2	2	3	3	3	3
575	wt%														60.085	40.311	70.937	56.079	81.41	159.694	149.88	101.962	152	61.979	94.203	79.87		1	1	1	1	1	2	2	2	2	2	2	1		4	2	2	2	2	3	3	3	3
576	wt%														60.085	40.311	70.937	56.079	81.41	159.694	149.88	101.962	152	61.979	94.203	79.87		1	1	1	1	1	2	2	2	2	2	2	1		4	2	2	2	2	3	3	3	3
577	wt%														60.085	40.311	70.937	56.079	81.41	159.694	149.88	101.962	152	61.979	94.203	79.87		1	1	1	1	1	2	2	2	2	2	2	1		4	2	2	2	2	3	3	3	3
578	wt%														60.085	40.311	70.937	56.079	81.41	159.694	149.88	101.962	152	61.979	94.203	79.87		1	1	1	1	1	2	2	2	2	2	2	1		4	2	2	2	2	3	3	3	3
579	wt%														60.085	40.311	70.937	56.079	81.41	159.694	149.88	101.962	152	61.979	94.203	79.87		1	1	1	1	1	2	2	2	2	2	2	1		4	2	2	2	2	3	3	3	3
580	wt%														60.085	40.311	70.937	56.079	81.41	159.694	149.88	101.962	152	61.979	94.203	79.87		1	1	1	1	1	2	2	2	2	2	2	1		4	2	2	2	2	3	3	3	3
581	wt%														60.085	40.311	70.937	56.079	81.41	159.694	149.88	101.962	152	61.979	94.203	79.87		1	1	1	1	1	2	2	2	2	2	2	1		4	2	2	2	2	3	3	3	3
582	wt%														60.085	40.311	70.937	56.079	81.41	159.694	149.88	101.962	152	61.979	94.203	79.87		1	1	1	1	1	2	2	2	2	2	2	1		4	2	2	2	2	3	3	3	3
583	wt%														60.085	40.311	70.937	56.079	81.41	159.694	149.88	101.962	152	61.979	94.203	79.87		1	1	1	1	1	2	2	2	2	2	2	1		4	2	2	2	2	3	3	3	3
584	wt%														60.085	40.311	70.937	56.079	81.41	159.694	149.88	101.962	152	61.979	94.203	79.87		1	1	1	1	1	2	2	2	2	2	2	1		4	2	2	2	2	3	3	3	3
585	wt%														60.085	40.311	70.937	56.079	81.41	159.694	149.88	101.962	152	61.979	94.203	79.87		1	1	1	1	1	2	2	2	2	2	2	1		4	2	2	2	2	3	3	3	3
586	wt%														60.085	40.311	70.937	56.079	81.41	159.694	149.88	101.962	152	61.979	94.203	79.87		1	1	1	1	1	2	2	2	2	2	2	1		4	2	2	2	2	3	3	3	3
587	wt%														60.085	40.311	70.937	56.079	81.41	159.694	149.88	101.962	152	61.979	94.203	79.87		1	1	1	1	1	2	2	2	2	2	2	1		4	2	2	2	2	3	3	3	3
588	wt%														60.085	40.311	70.937	56.079	81.41	159.694	149.88	101.962	152	61.979	94.203	79.87		1	1	1	1	1	2	2	2	2	2	2	1		4	2	2	2	2	3	3	3	3
589	wt%														60.085	40.311	70.937	56.079	81.41	159.694	149.88	101.962	152	61.979	94.203	79.87		1	1	1	1	1	2	2	2	2	2	2	1		4	2	2	2	2	3	3	3	3
590	wt%														60.085	40.311	70.937	56.079	81.41	159.694	149.88	101.962	152	61.979	94.203	79.87		1	1	1	1	1	2	2	2	2	2	2	1		4	2	2	2	2	3	3	3	3
591	wt%														60.085	40.311	70.937	56.079	81.41	159.694	149.88	101.962	152	61.979	94.203	79.87		1	1	1	1	1	2	2	2	2	2	2	1		4	2	2	2	2	3	3	3	3
592	wt%														60.085	40.311	70.937	56.079	81.41	159.694	149.88	101.962	152	61.979	94.203	79.87		1	1	1	1	1	2	2	2	2	2	2	1		4	2	2	2	2	3	3	3	3
593	wt%														60.085	40.311	70.937	56.079	81.41	159.694	149.88	101.962	152	61.979	94.203	79.87		1	1	1	1	1	2	2	2	2	2	2	1		4	2	2	2	2	3	3	3	3
594	wt%														60.085	40.311	70.937	56.079	81.41	159.694	149.88	101.962	152	61.979	94.203	79.87		1	1	1	1	1	2	2	2	2	2	2	1		4	2	2	2	2	3	3	3	3
595	wt%														60.085	40.311	70.937	56.079	81.41	159.694	149.88	101.962	152	61.979	94.203	79.87		1	1	1	1	1	2	2	2	2	2	2	1		4	2	2	2	2	3	3	3	3
596	wt%														60.085	40.311	70.937	56.079	81.41	159.694	149.88	101.962	152	61.979	94.203	79.87		1	1	1	1	1	2	2	2	2	2	2	1		4	2	2	2	2	3	3	3	3
597	wt%														60.085	40.311	70.937	56.079	81.41	159.694	149.88	101.962	152	61.979	94.203	79.87		1	1	1	1	1	2	2	2	2	2	2	1		4	2	2	2	2	3	3	3	3
598	wt%														60.085	40.311	70.937	56.079	81.41	159.694	149.88	101.962	152	61.979	94.203	79.87		1	1	1	1	1	2	2	2	2	2	2	1		4	2	2	2	2	3	3	3	3
599	wt%														60.085	40.311	70.937	56.079	81.41	159.694	149.88	101.962	152	61.979	94.203	79.87		1	1	1	1	1	2	2	2	2	2	2	1		4	2	2	2	2	3	3	3	3
600	wt%														60.085	40.311	70.937	56.079	81.41	159.694	149.88	101.962	152	61.979	94.203	79.87		1	1	1	1	1	2	2	2	2	2	2	1		4	2	2	2	2	3	3	3	3
601	wt%														60.085	40.311	70.937	56.079	81.41	159.694	149.88	101.962	152	61.979	94.203	79.87		1	1	1	1	1	2	2	2	2	2	2	1		4	2	2	2	2	3	3	3	3
602	wt%														60.085	40.311	70.937	56.079	81.41	159.694	149.88	101.962	152	61.979	94.203	79.87		1	1	1	1	1	2	2	2	2	2	2	1		4	2	2	2	2	3	3	3	3
603	wt%														60.085	40.311	70.937	56.079	81.41	159.694	149.88	101.962	152	61.979	94.203	79.87		1	1	1	1	1	2	2	2	2	2	2	1		4	2	2	2	2	3	3	3	3
604	wt%														60.085	40.311	70.937	56.079	81.41	159.694	149.88	101.962	152	61.979	94.203	79.87		1	1	1	1	1	2	2	2	2	2	2	1		4	2	2	2	2	3	3	3	3
605	wt%														60.085	40.311	70.937	56.079	81.41	159.694	149.88	101.962	152	61.979	94.203	79.87		1	1	1	1	1	2	2	2	2	2	2	1		4	2	2	2	2	3	3	3	3
606	wt%														60.085	40.311	70.937	56.079	81.41	159.694	149.88	101.962	152	61.979	94.203	79.87		1	1	1	1	1	2	2	2	2	2	2	1		4	2	2	2	2	3	3	3	3
607	wt%														60.085	40.311	70.937	56.079	81.41	159.694	149.88	101.962	152	61.979	94.203	79.87		1	1	1	1	1	2	2	2	2	2	2	1		4	2	2	2	2	3	3	3	3
608	wt%														60.085	40.311	70.937	56.079	81.41	159.694	149.88	101.962	152	61.979	94.203	79.87		1	1	1	1	1	2	2	2	2	2	2	1		4	2	2	2	2	3	3	3	3
609	wt%														60.085	40.311	70.937	56.079	81.41	159.694	149.88	101.962	152	61.979	94.203	79.87		1	1	1	1	1	2	2	2	2	2	2	1		4	2	2	2	2	3	3	3	3
610	wt%														60.085	40.311	70.937	56.079	81.41	159.694	149.88	101.962	152	61.979	94.203	79.87		1	1	1	1	1	2	2	2	2	2	2	1		4	2	2	2	2	3	3	3	3
611	wt%														60.085	40.311	70.937	56.079	81.41	159.694	149.88	101.962	152	61.979	94.203	79.87		1	1	1	1	1	2	2	2	2	2	2	1		4	2	2	2	2	3	3	3	3
612	wt%														60.085	40.311	70.937	56.079	81.41	159.694	149.88	101.962	152	61.979	94.203	79.87		1	1	1	1	1	2	2	2	2	2	2	1		4	2	2	2	2	3	3	3	3
613	wt%														60.085	40.311	70.937	56.079	81.41	159.694	149.88	101.962	152	61.979	94.203	79.87		1	1	1	1	1	2	2	2	2	2	2	1		4	2	2	2	2	3	3	3	3
614	wt%														60.085	40.311	70.937	56.079	81.41	159.694	149.88	101.962	152	61.979	94.203	79.87		1	1	1	1	1	2	2	2	2	2	2	1		4	2	2	2	2	3	3	3	3
615	wt%														60.085	40.311	70.937	56.079	81.41	159.694	149.88	101.962	152	61.979	94.203	79.87		1	1	1	1	1	2	2	2	2	2	2	1		4	2	2	2	2	3	3	3	3
616	wt%														60.085	40.311	70.937	56.079	81.41	159.694	149.88	101.962	152	61.979	94.203	79.87		1	1	1	1	1	2	2	2	2	2	2	1		4	2	2	2	2	3	3	3	3
617	wt%														60.085	40.311	70.937	56.079	81.41	159.694	149.88	101.962	152	61.979	94.203	79.87		1	1	1	1	1	2	2	2	2	2	2	1		4	2	2	2	2	3	3	3	3
618	wt%														60.085	40.311	70.937	56.079	81.41	159.694	149.88	101.962	152	61.979	94.203	79.87		1	1	1	1	1	2	2	2	2	2	2	1		4	2	2	2	2	3	3	3	3
619	wt%														60.085	40.311	70.937	56.079	81.41	159.694	149.88	101.962	152	61.979	94.203	79.87		1	1	1	1	1	2	2	2	2	2	2	1		4	2	2	2	2	3	3	3	3
620	wt%														60.085	40.311	70.937	56.079	81.41	159.694	149.88	101.962	152	61.979	94.203	79.87		1	1	1	1	1	2	2	2	2	2	2	1		4	2	2	2	2	3	3	3	3
621	wt%														60.085	40.311	70.937	56.079	81.41	159.694	149.88	101.962	152	61.979	94.203	79.87		1	1	1	1	1	2	2	2	2	2	2	1		4	2	2	2	2	3	3	3	3
622	wt%														60.085	40.311	70.937	56.079	81.41	159.694	149.88	101.962	152	61.979	94.203	79.87		1	1	1	1	1	2	2	2	2	2	2	1		4	2	2	2	2	3	3	3	3
623	wt%														60.085	40.311	70.937	56.079	81.41	159.694	149.88	101.962	152	61.979	94.203	79.87		1	1	1	1	1	2	2	2	2	2	2	1		4	2	2	2	2	3	3	3	3
624	wt%														60.085	40.311	70.937	56.079	81.41	159.694	149.88	101.962	152	61.979	94.203	79.87		1	1	1	1	1	2	2	2	2	2	2	1		4	2	2	2	2	3	3	3	3
625	wt%														60.085	40.311	70.937	56.079	81.41	159.694	149.88	101.962	152	61.979	94.203	79.87		1	1	1	1	1	2	2	2	2	2	2	1		4	2	2	2	2	3	3	3	3
626	wt%														60.085	40.311	70.937	56.079	81.41	159.694	149.88	101.962	152	61.979	94.203	79.87		1	1	1	1	1	2	2	2	2	2	2	1		4	2	2	2	2	3	3	3	3
627	wt%														60.085	40.311	70.937	56.079	81.41	159.694	149.88	101.962	152	61.979	94.203	79.87		1	1	1	1	1	2	2	2	2	2	2	1		4	2	2	2	2	3	3	3	3
628	wt%														60.085	40.311	70.937	56.079	81.41	159.694	149.88	101.962	152	61.979	94.203	79.87		1	1	1	1	1	2	2	2	2	2	2	1		4	2	2	2	2	3	3	3	3
629	wt%														60.085	40.311	70.937	56.079	81.41	159.694	149.88	101.962	152	61.979	94.203	79.87		1	1	1	1	1	2	2	2	2	2	2	1		4	2	2	2	2	3	3	3	3
630	wt%														60.085	40.311	70.937	56.079	81.41	159.694	149.88	101.962	152	61.979	94.203	79.87		1	1	1	1	1	2	2	2	2	2	2	1		4	2	2	2	2	3	3	3	3
631	wt%														60.085	40.311	70.937	56.079	81.41	159.694	149.88	101.962	152	61.979	94.203	79.87		1	1	1	1	1	2	2	2	2	2	2	1		4	2	2	2	2	3	3	3	3
632	wt%														60.085	40.311	70.937	56.079	81.41	159.694	149.88	101.962	152	61.979	94.203	79.87		1	1	1	1	1	2	2	2	2	2	2	1		4	2	2	2	2	3	3	3	3
633	wt%														60.085	40.311	70.937	56.079	81.41	159.694	149.88	101.962	152	61.979	94.203	79.87		1	1	1	1	1	2	2	2	2	2	2	1		4	2	2	2	2	3	3	3	3
634	wt%														60.085	40.311	70.937	56.079	81.41	159.694	149.88	101.962	152	61.979	94.203	79.87		1	1	1	1	1	2	2	2	2	2	2	1		4	2	2	2	2	3	3	3	3
635	wt%														60.085	40.311	70.937	56.079	81.41	159.694	149.88	101.962	152	61.979	94.203	79.87		1	1	1	1	1	2	2	2	2	2	2	1		4	2	2	2	2	3	3	3	3
636	wt%														60.085	40.311	70.937	56.079	81.41	159.694	149.88	101.962	152	61.979	94.203	79.87		1	1	1	1	1	2	2	2	2	2	2	1		4	2	2	2	2	3	3	3	3
637	wt%														60.085	40.311	70.937	56.079	81.41	159.694	149.88	101.962	152	61.979	94.203	79.87		1	1	1	1	1	2	2	2	2	2	2	1		4	2	2	2	2	3	3	3	3
638	wt%														60.085	40.311	70.937	56.079	81.41	159.694	149.88	101.962	152	61.979	94.203	79.87		1	1	1	1	1	2	2	2	2	2	2	1		4	2	2	2	2	3	3	3	3
639	wt%														60.085	40.311	70.937	56.079	81.41	159.694	149.88	101.962	152	61.979	94.203	79.87		1	1	1	1	1	2	2	2	2	2	2	1		4	2	2	2	2	3	3	3	3
640	wt%														60.085	40.311	70.937	56.079	81.41	159.694	149.88	101.962	152	61.979	94.203	79.87		1	1	1	1	1	2	2	2	2	2	2	1		4	2	2	2	2	3	3	3	3
641	wt%														60.085	40.311	70.937	56.079	81.41	159.694	149.88	101.962	152	61.979	94.203	79.87		1	1	1	1	1	2	2	2	2	2	2	1		4	2	2	2	2	3	3	3	3
642	wt%														60.085	40.311	70.937	56.079	81.41	159.694	149.88	101.962	152	61.979	94.203	79.87		1	1	1	1	1	2	2	2	2	2	2	1		4	2	2	2	2	3	3	3	3
643	wt%														60.085	40.311	70.937	56.079	81.41	159.694	149.88	101.962	152	61.979	94.203	79.87		1	1	1	1	1	2	2	2	2	2	2	1		4	2	2	2	2	3	3	3	3
644	wt%														60.085	40.311	70.937	56.079	81.41	159.694	149.88	101.962	152	61.979	94.203	79.87		1	1	1	1	1	2	2	2	2	2	2	1		4	2	2	2	2	3	3	3	3
645	wt%														60.085	40.311	70.937	56.079	81.41	159.694	149.88	101.962	152	61.979	94.203	79.87		1	1	1	1	1	2	2	2	2	2	2	1		4	2	2	2	2	3	3	3	3
646	wt%														60.085	40.311	70.937	56.079	81.41	159.694	149.88	101.962	152	61.979	94.203	79.87		1	1	1	1	1	2	2	2	2	2	2	1		4	2	2	2	2	3	3	3	3
647	wt%														60.085	40.311	70.937	56.079	81.41	159.694	149.88	101.962	152	61.979	94.203	79.87		1	1	1	1	1	2	2	2	2	2	2	1		4	2	2	2	2	3	3	3	3
648	wt%														60.085	40.311	70.937	56.079	81.41	159.694	149.88	101.962	152	61.979	94.203	79.87		1	1	1	1	1	2	2	2	2	2	2	1		4	2	2	2	2	3	3	3	3
649	wt%														60.085	40.311	70.937	56.079	81.41	159.694	149.88	101.962	152	61.979	94.203	79.87		1	1	1	1	1	2	2	2	2	2	2	1		4	2	2	2	2	3	3	3	3
650	wt%														60.085	40.311	70.937	56.079	81.41	159.694	149.88	101.962	152	61.979	94.203	79.87		1	1	1	1	1	2	2	2	2	2	2	1		4	2	2	2	2	3	3	3	3
651	wt%														60.085	40.311	70.937	56.079	81.41	159.694	149.88	101.962	152	61.979	94.203	79.87		1	1	1	1	1	2	2	2	2	2	2	1		4	2	2	2	2	3	3	3	3
652	wt%														60.085	40.311	70.937	56.079	81.41	159.694	149.88	101.962	152	61.979	94.203	79.87		1	1	1	1	1	2	2	2	2	2	2	1		4	2	2	2	2	3	3	3	3
653	wt%														60.085	40.311	70.937	56.079	81.41	159.694	149.88	101.962	152	61.979	94.203	79.87		1	1	1	1	1	2	2	2	2	2	2	1		4	2	2	2	2	3	3	3	3
654	wt%														60.085	40.311	70.937	56.079	81.41	159.694	149.88	101.962	152	61.979	94.203	79.87		1	1	1	1	1	2	2	2	2	2	2	1		4	2	2	2	2	3	3	3	3
655	wt%														60.085	40.311	70.937	56.079	81.41	159.694	149.88	101.962	152	61.979	94.203	79.87		1	1	1	1	1	2	2	2	2	2	2	1		4	2	2	2	2	3	3	3	3
656	wt%														60.085	40.311	70.937	56.079	81.41	159.694	149.88	101.962	152	61.979	94.203	79.87		1	1	1	1	1	2	2	2	2	2	2	1		4	2	2	2	2	3	3	3	3
657	wt%														60.085	40.311	70.937	56.079	81.41	159.694	149.88	101.962	152	61.979	94.203	79.87		1	1	1	1	1	2	2	2	2	2	2	1		4	2	2	2	2	3	3	3	3
658	wt%														60.085	40.311	70.937	56.079	81.41	159.694	149.88	101.962	152	61.979	94.203	79.87		1	1	1	1	1	2	2	2	2	2	2	1		4	2	2	2	2	3	3	3	3
659	wt%														60.085	40.311	70.937	56.079	81.41	159.694	149.88	101.962	152	61.979	94.203	79.87		1	1	1	1	1	2	2	2	2	2	2	1		4	2	2	2	2	3	3	3	3
660	wt%														60.085	40.311	70.937	56.079	81.41	159.694	149.88	101.962	152	61.979	94.203	79.87		1	1	1	1	1	2	2	2	2	2	2	1		4	2	2	2	2	3	3	3	3
661	wt%														60.085	40.311	70.937	56.079	81.41	159.694	149.88	101.962	152	61.979	94.203	79.87		1	1	1	1	1	2	2	2	2	2	2	1		4	2	2	2	2	3	3	3	3
662	wt%														60.085	40.311	70.937	56.079	81.41	159.694	149.88	101.962	152	61.979	94.203	79.87		1	1	1	1	1	2	2	2	2	2	2	1		4	2	2	2	2	3	3	3	3
663	wt%														60.085	40.311	70.937	56.079	81.41	159.694	149.88	101.962	152	61.979	94.203	79.87		1	1	1	1	1	2	2	2	2	2	2	1		4	2	2	2	2	3	3	3	3
664	wt%														60.085	40.311	70.937	56.079	81.41	159.694	149.88	101.962	152	61.979	94.203	79.87		1	1	1	1	1	2	2	2	2	2	2	1		4	2	2	2	2	3	3	3	3
665	wt%														60.085	40.311	70.937	56.079	81.41	159.694	149.88	101.962	152	61.979	94.203	79.87		1	1	1	1	1	2	2	2	2	2	2	1		4	2	2	2	2	3	3	3	3
666	wt%														60.085	40.311	70.937	56.079	81.41	159.694	149.88	101.962	152	61.979	94.203	79.87		1	1	1	1	1	2	2	2	2	2	2	1		4	2	2	2	2	3	3	3	3
667	wt%														60.085	40.311	70.937	56.079	81.41	159.694	149.88	101.962	152	61.979	94.203	79.87		1	1	1	1	1	2	2	2	2	2	2	1		4	2	2	2	2	3	3	3	3
668	wt%														60.085	40.311	70.937	56.079	81.41	159.694	149.88	101.962	152	61.979	94.203	79.87		1	1	1	1	1	2	2	2	2	2	2	1		4	2	2	2	2	3	3	3	3
669	wt%														60.085	40.311	70.937	56.079	81.41	159.694	149.88	101.962	152	61.979	94.203	79.87		1	1	1	1	1	2	2	2	2	2	2	1		4	2	2	2	2	3	3	3	3
670	wt%														60.085	40.311	70.937	56.079	81.41	159.694	149.88	101.962	152	61.979	94.203	79.87		1	1	1	1	1	2	2	2	2	2	2	1		4	2	2	2	2	3	3	3	3
671	wt%														60.085	40.311	70.937	56.079	81.41	159.694	149.88	101.962	152	61.979	94.203	79.87		1	1	1	1	1	2	2	2	2	2	2	1		4	2	2	2	2	3	3	3	3
672	wt%														60.085	40.311	70.937	56.079	81.41	159.694	149.88	101.962	152	61.979	94.203	79.87		1	1	1	1	1	2	2	2	2	2	2	1		4	2	2	2	2	3	3	3	3
673	wt%														60.085	40.311	70.937	56.079	81.41	159.694	149.88	101.962	152	61.979	94.203	79.87		1	1	1	1	1	2	2	2	2	2	2	1		4	2	2	2	2	3	3	3	3
674	wt%														60.085	40.311	70.937	56.079	81.41	159.694	149.88	101.962	152	61.979	94.203	79.87		1	1	1	1	1	2	2	2	2	2	2	1		4	2	2	2	2	3	3	3	3
675	wt%														60.085	40.311	70.937	56.079	81.41	159.694	149.88	101.962	152	61.979	94.203	79.87		1	1	1	1	1	2	2	2	2	2	2	1		4	2	2	2	2	3	3	3	3
676	wt%														60.085	40.311	70.937	56.079	81.41	159.694	149.88	101.962	152	61.979	94.203	79.87		1	1	1	1	1	2	2	2	2	2	2	1		4	2	2	2	2	3	3	3	3
677	wt%														60.085	40.311	70.937	56.079	81.41	159.694	149.88	101.962	152	61.979	94.203	79.87		1	1	1	1	1	2	2	2	2	2	2	1		4	2	2	2	2	3	3	3	3
678	wt%														60.085	40.311	70.937	56.079	81.41	159.694	149.88	101.962	152	61.979	94.203	79.87		1	1	1	1	1	2	2	2	2	2	2	1		4	2	2	2	2	3	3	3	3
679	wt%														60.085	40.311	70.937	56.079	81.41	159.694	149.88	101.962	152	61.979	94.203	79.87		1	1	1	1	1	2	2	2	2	2	2	1		4	2	2	2	2	3	3	3	3
680	wt%														60.085	40.311	70.937	56.079	81.41	159.694	149.88	101.962	152	61.979	94.203	79.87		1	1	1	1	1	2	2	2	2	2	2	1		4	2	2	2	2	3	3	3	3
681	wt%														60.085	40.311	70.937	56.079	81.41	159.694	149.88	101.962	152	61.979	94.203	79.87		1	1	1	1	1	2	2	2	2	2	2	1		4	2	2	2	2	3	3	3	3
682	wt%														60.085	40.311	70.937	56.079	81.41	159.694	149.88	101.962	152	61.979	94.203	79.87		1	1	1	1	1	2	2	2	2	2	2	1		4	2	2	2	2	3	3	3	3
683	wt%														60.085	40.311	70.937	56.079	81.41	159.694	149.88	101.962	152	61.979	94.203	79.87		1	1	1	1	1	2	2	2	2	2	2	1		4	2	2	2	2	3	3	3	3
684	wt%														60.085	40.311	70.937	56.079	81.41	159.694	149.88	101.962	152	61.979	94.203	79.87		1	1	1	1	1	2	2	2	2	2	2	1		4	2	2	2	2	3	3	3	3
685	wt%														60.085	40.311	70.937	56.079	81.41	159.694	149.88	101.962	152	61.979	94.203	79.87		1	1	1	1	1	2	2	2	2	2	2	1		4	2	2	2	2	3	3	3	3
686	wt%														60.085	40.311	70.937	56.079	81.41	159.694	149.88	101.962	152	61.979	94.203	79.87		1	1	1	1	1	2	2	2	2	2	2	1		4	2	2	2	2	3	3	3	3
687	wt%														60.085	40.311	70.937	56.079	81.41	159.694	149.88	101.962	152	61.979	94.203	79.87		1	1	1	1	1	2	2	2	2	2	2	1		4	2	2	2	2	3	3	3	3
688	wt%														60.085	40.311	70.937	56.079	81.41	159.694	149.88	101.962	152	61.979	94.203	79.87		1	1	1	1	1	2	2	2	2	2	2	1		4	2	2	2	2	3	3	3	3
689	wt%														60.085	40.311	70.937	56.079	81.41	159.694	149.88	101.962	152	61.979	94.203	79.87		1	1	1	1	1	2	2	2	2	2	2	1		4	2	2	2	2	3	3	3	3
690	wt%														60.085	40.311	70.937	56.079	81.41	159.694	149.88	101.962	152	61.979	94.203	79.87		1	1	1	1	1	2	2	2	2	2	2	1		4	2	2	2	2	3	3	3	3
691	wt%														60.085	40.311	70.937	56.079	81.41	159.694	149.88	101.962	152	61.979	94.203	79.87		1	1	1	1	1	2	2	2	2	2	2	1		4	2	2	2	2	3	3	3	3
692	wt%														60.085	40.311	70.937	56.079	81.41	159.694	149.88	101.962	152	61.979	94.203	79.87		1	1	1	1	1	2	2	2	2	2	2	1		4	2	2	2	2	3	3	3	3
693	wt%														60.085	40.311	70.937	56.079	81.41	159.694	149.88	101.962	152	61.979	94.203	79.87		1	1	1	1	1	2	2	2	2	2	2	1		4	2	2	2	2	3	3	3	3
694	wt%														60.085	40.311	70.937	56.079	81.41	159.694	149.88	101.962	152	61.979	94.203	79.87		1	1	1	1	1	2	2	2	2	2	2	1		4	2	2	2	2	3	3	3	3
695	wt%														60.085	40.311	70.937	56.079	81.41	159.694	149.88	101.962	152	61.979	94.203	79.87		1	1	1	1	1	2	2	2	2	2	2	1		4	2	2	2	2	3	3	3	3
696	wt%														60.085	40.311	70.937	56.079	81.41	159.694	149.88	101.962	152	61.979	94.203	79.87		1	1	1	1	1	2	2	2	2	2	2	1		4	2	2	2	2	3	3	3	3
697	wt%														60.085	40.311	70.937	56.079	81.41	159.694	149.88	101.962	152	61.979	94.203	79.87		1	1	1	1	1	2	2	2	2	2	2	1		4	2	2	2	2	3	3	3	3
698	wt%														60.085	40.311	70.937	56.079	81.41	159.694	149.88	101.962	152	61.979	94.203	79.87		1	1	1	1	1	2	2	2	2	2	2	1		4	2	2	2	2	3	3	3	3
699	wt%														60.085	40.311	70.937	56.079	81.41	159.694	149.88	101.962	152	61.979	94.203	79.87		1	1	1	1	1	2	2	2	2	2	2	1		4	2	2	2	2	3	3	3	3
700	wt%														60.085	40.311	70.937	56.079	81.41	159.694	149.88	101.962	152	61.979	94.203	79.87		1	1	1	1	1	2	2	2	2	2	2	1		4	2	2	2	2	3	3	3	3
701	wt%														60.085	40.311	70.937	56.079	81.41	159.694	149.88	101.962	152	61.979	94.203	79.87		1	1	1	1	1	2	2	2	2	2	2	1		4	2	2	2	2	3	3	3	3
702	wt%														60.085	40.311	70.937	56.079	81.41	159.694	149.88	101.962	152	61.979	94.203	79.87		1	1	1	1	1	2	2	2	2	2	2	1		4	2	2	2	2	3	3	3	3
703	wt%														60.085	40.311	70.937	56.079	81.41	159.694	149.88	101.962	152	61.979	94.203	79.87		1	1	1	1	1	2	2	2	2	2	2	1		4	2	2	2	2	3	3	3	3
704	wt%														60.085	40.311	70.937	56.079	81.41	159.694	149.88	101.962	152	61.979	94.203	79.87		1	1	1	1	1	2	2	2	2	2	2	1		4	2	2	2	2	3	3	3	3
705	wt%														60.085	40.311	70.937	56.079	81.41	159.694	149.88	101.962	152	61.979	94.203	79.87		1	1	1	1	1	2	2	2	2	2	2	1		4	2	2	2	2	3	3	3	3
706	wt%														60.085	40.311	70.937	56.079	81.41	159.694	149.88	101.962	152	61.979	94.203	79.87		1	1	1	1	1	2	2	2	2	2	2	1		4	2	2	2	2	3	3	3	3
707	wt%														60.085	40.311	70.937	56.079	81.41	159.694	149.88	101.962	152	61.979	94.203	79.87		1	1	1	1	1	2	2	2	2	2	2	1		4	2	2	2	2	3	3	3	3
708	wt%														60.085	40.311	70.937	56.079	81.41	159.694	149.88	101.962	152	61.979	94.203	79.87		1	1	1	1	1	2	2	2	2	2	2	1		4	2	2	2	2	3	3	3	3
709	wt%														60.085	40.311	70.937	56.079	81.41	159.694	149.88	101.962	152	61.979	94.203	79.87		1	1	1	1	1	2	2	2	2	2	2	1		4	2	2	2	2	3	3	3	3
710	wt%														60.085	40.311	70.937	56.079	81.41	159.694	149.88	101.962	152	61.979	94.203	79.87		1	1	1	1	1	2	2	2	2	2	2	1		4	2	2	2	2	3	3	3	3
711	wt%														60.085	40.311	70.937	56.079	81.41	159.694	149.88	101.962	152	61.979	94.203	79.87		1	1	1	1	1	2	2	2	2	2	2	1		4	2	2	2	2	3	3	3	3
712	wt%														60.085	40.311	70.937	56.079	81.41	159.694	149.88	101.962	152	61.979	94.203	79.87		1	1	1	1	1	2	2	2	2	2	2	1		4	2	2	2	2	3	3	3	3
713	wt%														60.085	40.311	70.937	56.079	81.41	159.694	149.88	101.962	152	61.979	94.203	79.87		1	1	1	1	1	2	2	2	2	2	2	1		4	2	2	2	2	3	3	3	3
714	wt%														60.085	40.311	70.937	56.079	81.41	159.694	149.88	101.962	152	61.979	94.203	79.87		1	1	1	1	1	2	2	2	2	2	2	1		4	2	2	2	2	3	3	3	3
715	wt%														60.085	40.311	70.937	56.079	81.41	159.694	149.88	101.962	152	61.979	94.203	79.87		1	1	1	1	1	2	2	2	2	2	2	1		4	2	2	2	2	3	3	3	3
716	wt%														60.085	40.311	70.937	56.079	81.41	159.694	149.88	101.962	152	61.979	94.203	79.87		1	1	1	1	1	2	2	2	2	2	2	1		4	2	2	2	2	3	3	3	3
717	wt%														60.085	40.311	70.937	56.079	81.41	159.694	149.88	101.962	152	61.979	94.203	79.87		1	1	1	1	1	2	2	2	2	2	2	1		4	2	2	2	2	3	3	3	3
718	wt%														60.085	40.311	70.937	56.079	81.41	159.694	149.88	101.962	152	61.979	94.203	79.87		1	1	1	1	1	2	2	2	2	2	2	1		4	2	2	2	2	3	3	3	3
719	wt%														60.085	40.311	70.937	56.079	81.41	159.694	149.88	101.962	152	61.979	94.203	79.87		1	1	1	1	1	2	2	2	2	2	2	1		4	2	2	2	2	3	3	3	3
720	wt%														60.085	40.311	70.937	56.079	81.41	159.694	149.88	101.962	152	61.979	94.203	79.87		1	1	1	1	1	2	2	2	2	2	2	1		4	2	2	2	2	3	3	3	3
721	wt%														60.085	40.311	70.937	56.079	81.41	159.694	149.88	101.962	152	61.979	94.203	79.87		1	1	1	1	1	2	2	2	2	2	2	1		4	2	2	2	2	3	3	3	3
722	wt%														60.085	40.311	70.937	56.079	81.41	159.694	149.88	101.962	152	61.979	94.203	79.87		1	1	1	1	1	2	2	2	2	2	2	1		4	2	2	2	2	3	3	3	3
723	wt%														60.085	40.311	70.937	56.079	81.41	159.694	149.88	101.962	152	61.979	94.203	79.87		1	1	1	1	1	2	2	2	2	2	2	1		4	2	2	2	2	3	3	3	3
724	wt%														60.085	40.311	70.937	56.079	81.41	159.694	149.88	101.962	152	61.979	94.203	79.87		1	1	1	1	1	2	2	2	2	2	2	1		4	2	2	2	2	3	3	3	3
725	wt%														60.085	40.311	70.937	56.079	81.41	159.694	149.88	101.962	152	61.979	94.203	79.87		1	1	1	1	1	2	2	2	2	2	2	1		4	2	2	2	2	3	3	3	3
726	wt%														60.085	40.311	70.937	56.079	81.41	159.694	149.88	101.962	152	61.979	94.203	79.87		1	1	1	1	1	2	2	2	2	2	2	1		4	2	2	2	2	3	3	3	3
727	wt%														60.085	40.311	70.937	56.079	81.41	159.694	149.88	101.962	152	61.979	94.203	79.87		1	1	1	1	1	2	2	2	2	2	2	1		4	2	2	2	2	3	3	3	3
728	wt%														60.085	40.311	70.937	56.079	81.41	159.694	149.88	101.962	152	61.979	94.203	79.87		1	1	1	1	1	2	2	2	2	2	2	1		4	2	2	2	2	3	3	3	3
729	wt%														60.085	40.311	70.937	56.079	81.41	159.694	149.88	101.962	152	61.979	94.203	79.87		1	1	1	1	1	2	2	2	2	2	2	1		4	2	2	2	2	3	3	3	3
730	wt%														60.085	40.311	70.937	56.079	81.41	159.694	149.88	101.962	152	61.979	94.203	79.87		1	1	1	1	1	2	2	2	2	2	2	1		4	2	2	2	2	3	3	3	3
731	wt%														60.085	40.311	70.937	56.079	81.41	159.694	149.88	101.962	152	61.979	94.203	79.87		1	1	1	1	1	2	2	2	2	2	2	1		4	2	2	2	2	3	3	3	3
732	wt%														60.085	40.311	70.937	56.079	81.41	159.694	149.88	101.962	152	61.979	94.203	79.87		1	1	1	1	1	2	2	2	2	2	2	1		4	2	2	2	2	3	3	3	3
733	wt%														60.085	40.311	70.937	56.079	81.41	159.694	149.88	101.962	152	61.979	94.203	79.87		1	1	1	1	1	2	2	2	2	2	2	1		4	2	2	2	2	3	3	3	3
734	wt%														60.085	40.311	70.937	56.079	81.41	159.694	149.88	101.962	152	61.979	94.203	79.87		1	1	1	1	1	2	2	2	2	2	2	1		4	2	2	2	2	3	3	3	3
735	wt%														60.085	40.311	70.937	56.079	81.41	159.694	149.88	101.962	152	61.979	94.203	79.87		1	1	1	1	1	2	2	2	2	2	2	1		4	2	2	2	2	3	3	3	3
736	wt%														60.085	40.311	70.937	56.079	81.41	159.694	149.88	101.962	152	61.979	94.203	79.87		1	1	1	1	1	2	2	2	2	2	2	1		4	2	2	2	2	3	3	3	3
737	wt%														60.085	40.311	70.937	56.079	81.41	159.694	149.88	101.962	152	61.979	94.203	79.87		1	1	1	1	1	2	2	2	2	2	2	1		4	2	2	2	2	3	3	3	3
738	wt%														60.085	40.311	70.937	56.079	81.41	159.694	149.88	101.962	152	61.979	94.203	79.87		1	1	1	1	1	2	2	2	2	2	2	1		4	2	2	2	2	3	3	3	3
739	wt%														60.085	40.311	70.937	56.079	81.41	159.694	149.88	101.962	152	61.979	94.203	79.87		1	1	1	1	1	2	2	2	2	2	2	1		4	2	2	2	2	3	3	3	3
740	wt%														60.085	40.311	70.937	56.079	81.41	159.694	149.88	101.962	152	61.979	94.203	79.87		1	1	1	1	1	2	2	2	2	2	2	1		4	2	2	2	2	3	3	3	3
741	wt%														60.085	40.311	70.937	56.079	81.41	159.694	149.88	101.962	152	61.979	94.203	79.87		1	1	1	1	1	2	2	2	2	2	2	1		4	2	2	2	2	3	3	3	3
742	wt%														60.085	40.311	70.937	56.079	81.41	159.694	149.88	101.962	152	61.979	94.203	79.87		1	1	1	1	1	2	2	2	2	2	2	1		4	2	2	2	2	3	3	3	3
743	wt%														60.085	40.311	70.937	56.079	81.41	159.694	149.88	101.962	152	61.979	94.203	79.87		1	1	1	1	1	2	2	2	2	2	2	1		4	2	2	2	2	3	3	3	3
744	wt%														60.085	40.311	70.937	56.079	81.41	159.694	149.88	101.962	152	61.979	94.203	79.87		1	1	1	1	1	2	2	2	2	2	2	1		4	2	2	2	2	3	3	3	3
745	wt%														60.085	40.311	70.937	56.079	81.41	159.694	149.88	101.962	152	61.979	94.203	79.87		1	1	1	1	1	2	2	2	2	2	2	1		4	2	2	2	2	3	3	3	3
746	wt%														60.085	40.311	70.937	56.079	81.41	159.694	149.88	101.962	152	61.979	94.203	79.87		1	1	1	1	1	2	2	2	2	2	2	1		4	2	2	2	2	3	3	3	3
747	wt%														60.085	40.311	70.937	56.079	81.41	159.694	149.88	101.962	152	61.979	94.203	79.87		1	1	1	1	1	2	2	2	2	2	2	1		4	2	2	2	2	3	3	3	3
748	wt%														60.085	40.311	70.937	56.079	81.41	159.694	149.88	101.962	152	61.979	94.203	79.87		1	1	1	1	1	2	2	2	2	2	2	1		4	2	2	2	2	3	3	3	3
749	wt%														60.085	40.311	70.937	56.079	81.41	159.694	149.88	101.962	152	61.979	94.203	79.87		1	1	1	1	1	2	2	2	2	2	2	1		4	2	2	2	2	3	3	3	3
750	wt%														60.085	40.311	70.937	56.079	81.41	159.694	149.88	101.962	152	61.979	94.203	79.87		1	1	1	1	1	2	2	2	2	2	2	1		4	2	2	2	2	3	3	3	3
751	wt%														60.085	40.311	70.937	56.079	81.41	159.694	149.88	101.962	152	61.979	94.203	79.87		1	1	1	1	1	2	2	2	2	2	2	1		4	2	2	2	2	3	3	3	3
752	wt%														60.085	40.311	70.937	56.079	81.41	159.694	149.88	101.962	152	61.979	94.203	79.87		1	1	1	1	1	2	2	2	2	2	2	1		4	2	2	2	2	3	3	3	3
753	wt%														60.085	40.311	70.937	56.079	81.41	159.694	149.88	101.962	152	61.979	94.203	79.87		1	1	1	1	1	2	2	2	2	2	2	1		4	2	2	2	2	3	3	3	3
754	wt%														60.085	40.311	70.937	56.079	81.41	159.694	149.88	101.962	152	61.979	94.203	79.87		1	1	1	1	1	2	2	2	2	2	2	1		4	2	2	2	2	3	3	3	3
755	wt%														60.085	40.311	70.937	56.079	81.41	159.694	149.88	101.962	152	61.979	94.203	79.87		1	1	1	1	1	2	2	2	2	2	2	1		4	2	2	2	2	3	3	3	3
756	wt%														60.085	40.311	70.937	56.079	81.41	159.694	149.88	101.962	152	61.979	94.203	79.87		1	1	1	1	1	2	2	2	2	2	2	1		4	2	2	2	2	3	3	3	3
757	wt%														60.085	40.311	70.937	56.079	81.41	159.694	149.88	101.962	152	61.979	94.203	79.87		1	1	1	1	1	2	2	2	2	2	2	1		4	2	2	2	2	3	3	3	3
758	wt%														60.085	40.311	70.937	56.079	81.41	159.694	149.88	101.962	152	61.979	94.203	79.87		1	1	1	1	1	2	2	2	2	2	2	1		4	2	2	2	2	3	3	3	3
759	wt%														60.085	40.311	70.937	56.079	81.41	159.694	149.88	101.962	152	61.979	94.203	79.87		1	1	1	1	1	2	2	2	2	2	2	1		4	2	2	2	2	3	3	3	3
760	wt%														60.085	40.311	70.937	56.079	81.41	159.694	149.88	101.962	152	61.979	94.203	79.87		1	1	1	1	1	2	2	2	2	2	2	1		4	2	2	2	2	3	3	3	3
761	wt%														60.085	40.311	70.937	56.079	81.41	159.694	149.88	101.962	152	61.979	94.203	79.87		1	1	1	1	1	2	2	2	2	2	2	1		4	2	2	2	2	3	3	3	3
762	wt%														60.085	40.311	70.937	56.079	81.41	159.694	149.88	101.962	152	61.979	94.203	79.87		1	1	1	1	1	2	2	2	2	2	2	1		4	2	2	2	2	3	3	3	3
763	wt%														60.085	40.311	70.937	56.079	81.41	159.694	149.88	101.962	152	61.979	94.203	79.87		1	1	1	1	1	2	2	2	2	2	2	1		4	2	2	2	2	3	3	3	3
764	wt%														60.085	40.311	70.937	56.079	81.41	159.694	149.88	101.962	152	61.979	94.203	79.87		1	1	1	1	1	2	2	2	2	2	2	1		4	2	2	2	2	3	3	3	3
765	wt%														60.085	40.311	70.937	56.079	81.41	159.694	149.88	101.962	152	61.979	94.203	79.87		1	1	1	1	1	2	2	2	2	2	2	1		4	2	2	2	2	3	3	3	3
766	wt%														60.085	40.311	70.937	56.079	81.41	159.694	149.88	101.962	152	61.979	94.203	79.87		1	1	1	1	1	2	2	2	2	2	2	1		4	2	2	2	2	3	3	3	3
767	wt%														60.085	40.311	70.937	56.079	81.41	159.694	149.88	101.962	152	61.979	94.203	79.87		1	1	1	1	1	2	2	2	2	2	2	1		4	2	2	2	2	3	3	3	3
768	wt%														60.085	40.311	70.937	56.079	81.41	159.694	149.88	101.962	152	61.979	94.203	79.87		1	1	1	1	1	2	2	2	2	2	2	1		4	2	2	2	2	3	3	3	3
769	wt%														60.085	40.311	70.937	56.079	81.41	159.694	149.88	101.962	152	61.979	94.203	79.87		1	1	1	1	1	2	2	2	2	2	2	1		4	2	2	2	2	3	3	3	3
770	wt%														60.085	40.311	70.937	56.079	81.41	159.694	149.88	101.962	152	61.979	94.203	79.87		1	1	1	1	1	2	2	2	2	2	2	1		4	2	2	2	2	3	3	3	3
771	wt%														60.085	40.311	70.937	56.079	81.41	159.694	149.88	101.962	152	61.979	94.203	79.87		1	1	1	1	1	2	2	2	2	2	2	1		4	2	2	2	2	3	3	3	3
772	wt%														60.085	40.311	70.937	56.079	81.41	159.694	149.88	101.962	152	61.979	94.203	79.87		1	1	1	1	1	2	2	2	2	2	2	1		4	2	2	2	2	3	3	3	3
773	wt%														60.085	40.311	70.937	56.079	81.41	159.694	149.88	101.962	152	61.979	94.203	79.87		1	1	1	1	1	2	2	2	2	2	2	1		4	2	2	2	2	3	3	3	3
774	wt%														60.085	40.311	70.937	56.079	81.41	159.694	149.88	101.962	152	61.979	94.203	79.87		1	1	1	1	1	2	2	2	2	2	2	1		4	2	2	2	2	3	3	3	3
775	wt%														60.085	40.311	70.937	56.079	81.41	159.694	149.88	101.962	152	61.979	94.203	79.87		1	1	1	1	1	2	2	2	2	2	2	1		4	2	2	2	2	3	3	3	3
776	wt%														60.085	40.311	70.937	56.079	81.41	159.694	149.88	101.962	152	61.979	94.203	79.87		1	1	1	1	1	2	2	2	2	2	2	1		4	2	2	2	2	3	3	3	3
777	wt%														60.085	40.311	70.937	56.079	81.41	159.694	149.88	101.962	152	61.979	94.203	79.87		1	1	1	1	1	2	2	2	2	2	2	1		4	2	2	2	2	3	3	3	3
778	wt%														60.085	40.311	70.937	56.079	81.41	159.694	149.88	101.962	152	61.979	94.203	79.87		1	1	1	1	1	2	2	2	2	2	2	1		4	2	2	2	2	3	3	3	3
779	wt%														60.085	40.311	70.937	56.079	81.41	159.694	149.88	101.962	152	61.979	94.203	79.87		1	1	1	1	1	2	2	2	2	2	2	1		4	2	2	2	2	3	3	3	3
780	wt%														60.085	40.311	70.937	56.079	81.41	159.694	149.88	101.962	152	61.979	94.203	79.87		1	1	1	1	1	2	2	2	2	2	2	1		4	2	2	2	2	3	3	3	3
781	wt%														60.085	40.311	70.937	56.079	81.41	159.694	149.88	101.962	152	61.979	94.203	79.87		1	1	1	1	1	2	2	2	2	2	2	1		4	2	2	2	2	3	3	3	3
782	wt%														60.085	40.311	70.937	56.079	81.41	159.694	149.88	101.962	152	61.979	94.203	79.87		1	1	1	1	1	2	2	2	2	2	2	1		4	2	2	2	2	3	3	3	3
783	wt%														60.085	40.311	70.937	56.079	81.41	159.694	149.88	101.962	152	61.979	94.203	79.87		1	1	1	1	1	2	2	2	2	2	2	1		4	2	2	2	2	3	3	3	3
784	wt%														60.085	40.311	70.937	56.079	81.41	159.694	149.88	101.962	152	61.979	94.203	79.87		1	1	1	1	1	2	2	2	2	2	2	1		4	2	2	2	2	3	3	3	3
785	wt%														60.085	40.311	70.937	56.079	81.41	159.694	149.88	101.962	152	61.979	94.203	79.87		1	1	1	1	1	2	2	2	2	2	2	1		4	2	2	2	2	3	3	3	3
786	wt%														60.085	40.311	70.937	56.079	81.41	159.694	149.88	101.962	152	61.979	94.203	79.87		1	1	1	1	1	2	2	2	2	2	2	1		4	2	2	2	2	3	3	3	3
787	wt%														60.085	40.311	70.937	56.079	81.41	159.694	149.88	101.962	152	61.979	94.203	79.87		1	1	1	1	1	2	2	2	2	2	2	1		4	2	2	2	2	3	3	3	3
788	wt%														60.085	40.311	70.937	56.079	81.41	159.694	149.88	101.962	152	61.979	94.203	79.87		1	1	1	1	1	2	2	2	2	2	2	1		4	2	2	2	2	3	3	3	3
789	wt%														60.085	40.311	70.937	56.079	81.41	159.694	149.88	101.962	152	61.979	94.203	79.87		1	1	1	1	1	2	2	2	2	2	2	1		4	2	2	2	2	3	3	3	3
790	wt%														60.085	40.311	70.937	56.079	81.41	159.694	149.88	101.962	152	61.979	94.203	79.87		1	1	1	1	1	2	2	2	2	2	2	1		4	2	2	2	2	3	3	3	3
791	wt%														60.085	40.311	70.937	56.079	81.41	159.694	149.88	101.962	152	61.979	94.203	79.87		1	1	1	1	1	2	2	2	2	2	2	1		4	2	2	2	2	3	3	3	3
792	wt%														60.085	40.311	70.937	56.079	81.41	159.694	149.88	101.962	152	61.979	94.203	79.87		1	1	1	1	1	2	2	2	2	2	2	1		4	2	2	2	2	3	3	3	3
793	wt%														60.085	40.311	70.937	56.079	81.41	159.694	149.88	101.962	152	61.979	94.203	79.87		1	1	1	1	1	2	2	2	2	2	2	1		4	2	2	2	2	3	3	3	3
794	wt%														60.085	40.311	70.937	56.079	81.41	159.694	149.88	101.962	152	61.979	94.203	79.87		1	1	1	1	1	2	2	2	2	2	2	1		4	2	2	2	2	3	3	3	3
795	wt%														60.085	40.311	70.937	56.079	81.41	159.694	149.88	101.962	152	61.979	94.203	79.87		1	1	1	1	1	2	2	2	2	2	2	1		4	2	2	2	2	3	3	3	3
796	wt%														60.085	40.311	70.937	56.079	81.41	159.694	149.88	101.962	152	61.979	94.203	79.87		1	1	1	1	1	2	2	2	2	2	2	1		4	2	2	2	2	3	3	3	3
797	wt%														60.085	40.311	70.937	56.079	81.41	159.694	149.88	101.962	152	61.979	94.203	79.87		1	1	1	1	1	2	2	2	2	2	2	1		4	2	2	2	2	3	3	3	3
798	wt%														60.085	40.311	70.937	56.079	81.41	159.694	149.88	101.962	152	61.979	94.203	79.87		1	1	1	1	1	2	2	2	2	2	2	1		4	2	2	2	2	3	3	3	3
799	wt%														60.085	40.311	70.937	56.079	81.41	159.694	149.88	101.962	152	61.979	94.203	79.87		1	1	1	1	1	2	2	2	2	2	2	1		4	2	2	2	2	3	3	3	3
800	wt%														60.085	40.311	70.937	56.079	81.41	159.694	149.88	101.962	152	61.979	94.203	79.87		1	1	1	1	1	2	2	2	2	2	2	1		4	2	2	2	2	3	3	3	3
801	wt%														60.085	40.311	70.937	56.079	81.41	159.694	149.88	101.962	152	61.979	94.203	79.87		1	1	1	1	1	2	2	2	2	2	2	1		4	2	2	2	2	3	3	3	3
802	wt%														60.085	40.311	70.937	56.079	81.41	159.694	149.88	101.962	152	61.979	94.203	79.87		1	1	1	1	1	2	2	2	2	2	2	1		4	2	2	2	2	3	3	3	3
803	wt%														60.085	40.311	70.937	56.079	81.41	159.694	149.88	101.962	152	61.979	94.203	79.87		1	1	1	1	1	2	2	2	2	2	2	1		4	2	2	2	2	3	3	3	3
804	wt%														60.085	40.311	70.937	56.079	81.41	159.694	149.88	101.962	152	61.979	94.203	79.87		1	1	1	1	1	2	2	2	2	2	2	1		4	2	2	2	2	3	3	3	3
805	wt%														60.085	40.311	70.937	56.079	81.41	159.694	149.88	101.962	152	61.979	94.203	79.87		1	1	1	1	1	2	2	2	2	2	2	1		4	2	2	2	2	3	3	3	3
806	wt%														60.085	40.311	70.937	56.079	81.41	159.694	149.88	101.962	152	61.979	94.203	79.87		1	1	1	1	1	2	2	2	2	2	2	1		4	2	2	2	2	3	3	3	3
807	wt%														60.085	40.311	70.937	56.079	81.41	159.694	149.88	101.962	152	61.979	94.203	79.87		1	1	1	1	1	2	2	2	2	2	2	1		4	2	2	2	2	3	3	3	3
808	wt%														60.085	40.311	70.937	56.079	81.41	159.694	149.88	101.962	152	61.979	94.203	79.87		1	1	1	1	1	2	2	2	2	2	2	1		4	2	2	2	2	3	3	3	3
809	wt%														60.085	40.311	70.937	56.079	81.41	159.694	149.88	101.962	152	61.979	94.203	79.87		1	1	1	1	1	2	2	2	2	2	2	1		4	2	2	2	2	3	3	3	3
810	wt%														60.085	40.311	70.937	56.079	81.41	159.694	149.88	101.962	152	61.979	94.203	79.87		1	1	1	1	1	2	2	2	2	2	2	1		4	2	2	2	2	3	3	3	3
811	wt%														60.085	40.311	70.937	56.079	81.41	159.694	149.88	101.962	152	61.979	94.203	79.87		1	1	1	1	1	2	2	2	2	2	2	1		4	2	2	2	2	3	3	3	3
812	wt%														60.085	40.311	70.937	56.079	81.41	159.694	149.88	101.962	152	61.979	94.203	79.87		1	1	1	1	1	2	2	2	2	2	2	1		4	2	2	2	2	3	3	3	3
813	wt%														60.085	40.311	70.937	56.079	81.41	159.694	149.88	101.962	152	61.979	94.203	79.87		1	1	1	1	1	2	2	2	2	2	2	1		4	2	2	2	2	3	3	3	3
814	wt%														60.085	40.311	70.937	56.079	81.41	159.694	149.88	101.962	152	61.979	94.203	79.87		1	1	1	1	1	2	2	2	2	2	2	1		4	2	2	2	2	3	3	3	3
815	wt%														60.085	40.311	70.937	56.079	81.41	159.694	149.88	101.962	152	61.979	94.203	79.87		1	1	1	1	1	2	2	2	2	2	2	1		4	2	2	2	2	3	3	3	3
816	wt%														60.085	40.311	70.937	56.079	81.41	159.694	149.88	101.962	152	61.979	94.203	79.87		1	1	1	1	1	2	2	2	2	2	2	1		4	2	2	2	2	3	3	3	3
817	wt%														60.085	40.311	70.937	56.079	81.41	159.694	149.88	101.962	152	61.979	94.203	79.87		1	1	1	1	1	2	2	2	2	2	2	1		4	2	2	2	2	3	3	3	3
818	wt%														60.085	40.311	70.937	56.079	81.41	159.694	149.88	101.962	152	61.979	94.203	79.87		1	1	1	1	1	2	2	2	2	2	2	1		4	2	2	2	2	3	3	3	3
819	wt%														60.085	40.311	70.937	56.079	81.41	159.694	149.88	101.962	152	61.979	94.203	79.87		1	1	1	1	1	2	2	2	2	2	2	1		4	2	2	2	2	3	3	3	3
820	wt%														60.085	40.311	70.937	56.079	81.41	159.694	149.88	101.962	152	61.979	94.203	79.87		1	1	1	1	1	2	2	2	2	2	2	1		4	2	2	2	2	3	3	3	3
821	wt%														60.085	40.311	70.937	56.079	81.41	159.694	149.88	101.962	152	61.979	94.203	79.87		1	1	1	1	1	2	2	2	2	2	2	1		4	2	2	2	2	3	3	3	3
822	wt%														60.085	40.311	70.937	56.079	81.41	159.694	149.88	101.962	152	61.979	94.203	79.87		1	1	1	1	1	2	2	2	2	2	2	1		4	2	2	2	2	3	3	3	3
823	wt%														60.085	40.311	70.937	56.079	81.41	159.694	149.88	101.962	152	61.979	94.203	79.87		1	1	1	1	1	2	2	2	2	2	2	1		4	2	2	2	2	3	3	3	3
824	wt%														60.085	40.311	70.937	56.079	81.41	159.694	149.88	101.962	152	61.979	94.203	79.87		1	1	1	1	1	2	2	2	2	2	2	1		4	2	2	2	2	3	3	3	3
825	wt%														60.085	40.311	70.937	56.079	81.41	159.694	149.88	101.962	152	61.979	94.203	79.87		1	1	1	1	1	2	2	2	2	2	2	1		4	2	2	2	2	3	3	3	3
826	wt%														60.085	40.311	70.937	56.079	81.41	159.694	149.88	101.962	152	61.979	94.203	79.87		1	1	1	1	1	2	2	2	2	2	2	1		4	2	2	2	2	3	3	3	3
827	wt%														60.085	40.311	70.937	56.079	81.41	159.694	149.88	101.962	152	61.979	94.203	79.87		1	1	1	1	1	2	2	2	2	2	2	1		4	2	2	2	2	3	3	3	3
828	wt%														60.085	40.311	70.937	56.079	81.41	159.694	149.88	101.962	152	61.979	94.203	79.87		1	1	1	1	1	2	2	2	2	2	2	1		4	2	2	2	2	3	3	3	3
829	wt%														60.085	40.311	70.937	56.079	81.41	159.694	149.88	101.962	152	61.979	94.203	79.87		1	1	1	1	1	2	2	2	2	2	2	1		4	2	2	2	2	3	3	3	3
830	wt%														60.085	40.311	70.937	56.079	81.41	159.694	149.88	101.962	152	61.979	94.203	79.87		1	1	1	1	1	2	2	2	2	2	2	1		4	2	2	2	2	3	3	3	3
831	wt%														60.085	40.311	70.937	56.079	81.41	159.694	149.88	101.962	152	61.979	94.203	79.87		1	1	1	1	1	2	2	2	2	2	2	1		4	2	2	2	2	3	3	3	3
832	wt%														60.085	40.311	70.937	56.079	81.41	159.694	149.88	101.962	152	61.979	94.203	79.87		1	1	1	1	1	2	2	2	2	2	2	1		4	2	2	2	2	3	3	3	3
833	wt%														60.085	40.311	70.937	56.079	81.41	159.694	149.88	101.962	152	61.979	94.203	79.87		1	1	1	1	1	2	2	2	2	2	2	1		4	2	2	2	2	3	3	3	3
834	wt%														60.085	40.311	70.937	56.079	81.41	159.694	149.88	101.962	152	61.979	94.203	79.87		1	1	1	1	1	2	2	2	2	2	2	1		4	2	2	2	2	3	3	3	3
835	wt%														60.085	40.311	70.937	56.079	81.41	159.694	149.88	101.962	152	61.979	94.203	79.87		1	1	1	1	1	2	2	2	2	2	2	1		4	2	2	2	2	3	3	3	3
836	wt%														60.085	40.311	70.937	56.079	81.41	159.694	149.88	101.962	152	61.979	94.203	79.87		1	1	1	1	1	2	2	2	2	2	2	1		4	2	2	2	2	3	3	3	3
837	wt%														60.085	40.311	70.937	56.079	81.41	159.694	149.88	101.962	152	61.979	94.203	79.87		1	1	1	1	1	2	2	2	2	2	2	1		4	2	2	2	2	3	3	3	3
838	wt%														60.085	40.311	70.937	56.079	81.41	159.694	149.88	101.962	152	61.979	94.203	79.87		1	1	1	1	1	2	2	2	2	2	2	1		4	2	2	2	2	3	3	3	3
839	wt%														60.085	40.311	70.937	56.079	81.41	159.694	149.88	101.962	152	61.979	94.203	79.87		1	1	1	1	1	2	2	2	2	2	2	1		4	2	2	2	2	3	3	3	3
840	wt%														60.085	40.311	70.937	56.079	81.41	159.694	149.88	101.962	152	61.979	94.203	79.87		1	1	1	1	1	2	2	2	2	2	2	1		4	2	2	2	2	3	3	3	3
841	wt%														60.085	40.311	70.937	56.079	81.41	159.694	149.88	101.962	152	61.979	94.203	79.87		1	1	1	1	1	2	2	2	2	2	2	1		4	2	2	2	2	3	3	3	3
842	wt%														60.085	40.311	70.937	56.079	81.41	159.694	149.88	101.962	152	61.979	94.203	79.87		1	1	1	1	1	2	2	2	2	2	2	1		4	2	2	2	2	3	3	3	3
843	wt%														60.085	40.311	70.937	56.079	81.41	159.694	149.88	101.962	152	61.979	94.203	79.87		1	1	1	1	1	2	2	2	2	2	2	1		4	2	2	2	2	3	3	3	3
844	wt%														60.085	40.311	70.937	56.079	81.41	159.694	149.88	101.962	152	61.979	94.203	79.87		1	1	1	1	1	2	2	2	2	2	2	1		4	2	2	2	2	3	3	3	3
845	wt%														60.085	40.311	70.937	56.079	81.41	159.694	149.88	101.962	152	61.979	94.203	79.87		1	1	1	1	1	2	2	2	2	2	2	1		4	2	2	2	2	3	3	3	3
846	wt%														60.085	40.311	70.937	56.079	81.41	159.694	149.88	101.962	152	61.979	94.203	79.87		1	1	1	1	1	2	2	2	2	2	2	1		4	2	2	2	2	3	3	3	3
847	wt%														60.085	40.311	70.937	56.079	81.41	159.694	149.88	101.962	152	61.979	94.203	79.87		1	1	1	1	1	2	2	2	2	2	2	1		4	2	2	2	2	3	3	3	3
848	wt%														60.085	40.311	70.937	56.079	81.41	159.694	149.88	101.962	152	61.979	94.203	79.87		1	1	1	1	1	2	2	2	2	2	2	1		4	2	2	2	2	3	3	3	3
849	wt%														60.085	40.311	70.937	56.079	81.41	159.694	149.88	101.962	152	61.979	94.203	79.87		1	1	1	1	1	2	2	2	2	2	2	1		4	2	2	2	2	3	3	3	3
850	wt%														60.085	40.311	70.937	56.079	81.41	159.694	149.88	101.962	152	61.979	94.203	79.87		1	1	1	1	1	2	2	2	2	2	2	1		4	2	2	2	2	3	3	3	3
851	wt%														60.085	40.311	70.937	56.079	81.41	159.694	149.88	101.962	152	61.979	94.203	79.87		1	1	1	1	1	2	2	2	2	2	2	1		4	2	2	2	2	3	3	3	3
852	wt%														60.085	40.311	70.937	56.079	81.41	159.694	149.88	101.962	152	61.979	94.203	79.87		1	1	1	1	1	2	2	2	2	2	2	1		4	2	2	2	2	3	3	3	3
853	wt%														60.085	40.311	70.937	56.079	81.41	159.694	149.88	101.962	152	61.979	94.203	79.87		1	1	1	1	1	2	2	2	2	2	2	1		4	2	2	2	2	3	3	3	3
854	wt%														60.085	40.311	70.937	56.079	81.41	159.694	149.88	101.962	152	61.979	94.203	79.87		1	1	1	1	1	2	2	2	2	2	2	1		4	2	2	2	2	3	3	3	3
855	wt%														60.085	40.311	70.937	56.079	81.41	159.694	149.88	101.962	152	61.979	94.203	79.87		1	1	1	1	1	2	2	2	2	2	2	1		4	2	2	2	2	3	3	3	3
856	wt%														60.085	40.311	70.937	56.079	81.41	159.694	149.88	101.962	152	61.979	94.203	79.87		1	1	1	1	1	2	2	2	2	2	2	1		4	2	2	2	2	3	3	3	3
857	wt%														60.085	40.311	70.937	56.079	81.41	159.694	149.88	101.962	152	61.979	94.203	79.87		1	1	1	1	1	2	2	2	2	2	2	1		4	2	2	2	2	3	3	3	3
858	wt%														60.085	40.311	70.937	56.079	81.41	159.694	149.88	101.962	152	61.979	94.203	79.87		1	1	1	1	1	2	2	2	2	2	2	1		4	2	2	2	2	3	3	3	3
859	wt%														60.085	40.311	70.937	56.079	81.41	159.694	149.88	101.962	152	61.979	94.203	79.87		1	1	1	1	1	2	2	2	2	2	2	1		4	2	2	2	2	3	3	3	3
860	wt%														60.085	40.311	70.937	56.079	81.41	159.694	149.88	101.962	152	61.979	94.203	79.87		1	1	1	1	1	2	2	2	2	2	2	1		4	2	2	2	2	3	3	3	3
861	wt%														60.085	40.311	70.937	56.079	81.41	159.694	149.88	101.962	152	61.979	94.203	79.87		1	1	1	1	1	2	2	2	2	2	2	1		4	2	2	2	2	3	3	3	3
862	wt%														60.085	40.311	70.937	56.079	81.41	159.694	149.88	101.962	152	61.979	94.203	79.87		1	1	1	1	1	2	2	2	2	2	2	1		4	2	2	2	2	3	3	3	3
863	wt%														60.085	40.311	70.937	56.079	81.41	159.694	149.88	101.962	152	61.979	94.203	79.87		1	1	1	1	1	2	2	2	2	2	2	1		4	2	2	2	2	3	3	3	3
864	wt%														60.085	40.311	70.937	56.079	81.41	159.694	149.88	101.962	152	61.979	94.203	79.87		1	1	1	1	1	2	2	2	2	2	2	1		4	2	2	2	2	3	3	3	3
865	wt%														60.085	40.311	70.937	56.079	81.41	159.694	149.88	101.962	152	61.979	94.203	79.87		1	1	1	1	1	2	2	2	2	2	2	1		4	2	2	2	2	3	3	3	3
866	wt%														60.085	40.311	70.937	56.079	81.41	159.694	149.88	101.962	152	61.979	94.203	79.87		1	1	1	1	1	2	2	2	2	2	2	1		4	2	2	2	2	3	3	3	3
867	wt%														60.085	40.311	70.937	56.079	81.41	159.694	149.88	101.962	152	61.979	94.203	79.87		1	1	1	1	1	2	2	2	2	2	2	1		4	2	2	2	2	3	3	3	3
868	wt%														60.085	40.311	70.937	56.079	81.41	159.694	149.88	101.962	152	61.979	94.203	79.87		1	1	1	1	1	2	2	2	2	2	2	1		4	2	2	2	2	3	3	3	3
869	wt%														60.085	40.311	70.937	56.079	81.41	159.694	149.88	101.962	152	61.979	94.203	79.87		1	1	1	1	1	2	2	2	2	2	2	1		4	2	2	2	2	3	3	3	3
870	wt%														60.085	40.311	70.937	56.079	81.41	159.694	149.88	101.962	152	61.979	94.203	79.87		1	1	1	1	1	2	2	2	2	2	2	1		4	2	2	2	2	3	3	3	3
871	wt%														60.085	40.311	70.937	56.079	81.41	159.694	149.88	101.962	152	61.979	94.203	79.87		1	1	1	1	1	2	2	2	2	2	2	1		4	2	2	2	2	3	3	3	3
872	wt%														60.085	40.311	70.937	56.079	81.41	159.694	149.88	101.962	152	61.979	94.203	79.87		1	1	1	1	1	2	2	2	2	2	2	1		4	2	2	2	2	3	3	3	3
873	wt%														60.085	40.311	70.937	56.079	81.41	159.694	149.88	101.962	152	61.979	94.203	79.87		1	1	1	1	1	2	2	2	2	2	2	1		4	2	2	2	2	3	3	3	3
874	wt%														60.085	40.311	70.937	56.079	81.41	159.694	149.88	101.962	152	61.979	94.203	79.87		1	1	1	1	1	2	2	2	2	2	2	1		4	2	2	2	2	3	3	3	3
875	wt%														60.085	40.311	70.937	56.079	81.41	159.694	149.88	101.962	152	61.979	94.203	79.87		1	1	1	1	1	2	2	2	2	2	2	1		4	2	2	2	2	3	3	3	3
876	wt%														60.085	40.311	70.937	56.079	81.41	159.694	149.88	101.962	152	61.979	94.203	79.87		1	1	1	1	1	2	2	2	2	2	2	1		4	2	2	2	2	3	3	3	3
877	wt%														60.085	40.311	70.937	56.079	81.41	159.694	149.88	101.962	152	61.979	94.203	79.87		1	1	1	1	1	2	2	2	2	2	2	1		4	2	2	2	2	3	3	3	3
878	wt%														60.085	40.311	70.937	56.079	81.41	159.694	149.88	101.962	152	61.979	94.203	79.87		1	1	1	1	1	2	2	2	2	2	2	1		4	2	2	2	2	3	3	3	3
879	wt%														60.085	40.311	70.937	56.079	81.41	159.694	149.88	101.962	152	61.979	94.203	79.87		1	1	1	1	1	2	2	2	2	2	2	1		4	2	2	2	2	3	3	3	3
880	wt%														60.085	40.311	70.937	56.079	81.41	159.694	149.88	101.962	152	61.979	94.203	79.87		1	1	1	1	1	2	2	2	2	2	2	1		4	2	2	2	2	3	3	3	3
881	wt%														60.085	40.311	70.937	56.079	81.41	159.694	149.88	101.962	152	61.979	94.203	79.87		1	1	1	1	1	2	2	2	2	2	2	1		4	2	2	2	2	3	3	3	3
882	wt%														60.085	40.311	70.937	56.079	81.41	159.694	149.88	101.962	152	61.979	94.203	79.87		1	1	1	1	1	2	2	2	2	2	2	1		4	2	2	2	2	3	3	3	3
883	wt%														60.085	40.311	70.937	56.079	81.41	159.694	149.88	101.962	152	61.979	94.203	79.87		1	1	1	1	1	2	2	2	2	2	2	1		4	2	2	2	2	3	3	3	3
884	wt%														60.085	40.311	70.937	56.079	81.41	159.694	149.88	101.962	152	61.979	94.203	79.87		1	1	1	1	1	2	2	2	2	2	2	1		4	2	2	2	2	3	3	3	3
885	wt%														60.085	40.311	70.937	56.079	81.41	159.694	149.88	101.962	152	61.979	94.203	79.87		1	1	1	1	1	2	2	2	2	2	2	1		4	2	2	2	2	3	3	3	3
886	wt%														60.085	40.311	70.937	56.079	81.41	159.694	149.88	101.962	152	61.979	94.203	79.87		1	1	1	1	1	2	2	2	2	2	2	1		4	2	2	2	2	3	3	3	3
887	wt%														60.085	40.311	70.937	56.079	81.41	159.694	149.88	101.962	152	61.979	94.203	79.87		1	1	1	1	1	2	2	2	2	2	2	1		4	2	2	2	2	3	3	3	3
888	wt%														60.085	40.311	70.937	56.079	81.41	159.694	149.88	101.962	152	61.979	94.203	79.87		1	1	1	1	1	2	2	2	2	2	2	1		4	2	2	2	2	3	3	3	3
889	wt%														60.085	40.311	70.937	56.079	81.41	159.694	149.88	101.962	152	61.979	94.203	79.87		1	1	1	1	1	2	2	2	2	2	2	1		4	2	2	2	2	3	3	3	3
890	wt%														60.085	40.311	70.937	56.079	81.41	159.694	149.88	101.962	152	61.979	94.203	79.87		1	1	1	1	1	2	2	2	2	2	2	1		4	2	2	2	2	3	3	3	3
891	wt%														60.085	40.311	70.937	56.079	81.41	159.694	149.88	101.962	152	61.979	94.203	79.87		1	1	1	1	1	2	2	2	2	2	2	1		4	2	2	2	2	3	3	3	3
892	wt%														60.085	40.311	70.937	56.079	81.41	159.694	149.88	101.962	152	61.979	94.203	79.87		1	1	1	1	1	2	2	2	2	2	2	1		4	2	2	2	2	3	3	3	3
893	wt%														60.085	40.311	70.937	56.079	81.41	159.694	149.88	101.962	152	61.979	94.203	79.87		1	1	1	1	1	2	2	2	2	2	2	1		4	2	2	2	2	3	3	3	3
894	wt%														60.085	40.311	70.937	56.079	81.41	159.694	149.88	101.962	152	61.979	94.203	79.87		1	1	1	1	1	2	2	2	2	2	2	1		4	2	2	2	2	3	3	3	3
895	wt%														60.085	40.311	70.937	56.079	81.41	159.694	149.88	101.962	152	61.979	94.203	79.87		1	1	1	1	1	2	2	2	2	2	2	1		4	2	2	2	2	3	3	3	3
896	wt%														60.085	40.311	70.937	56.079	81.41	159.694	149.88	101.962	152	61.979	94.203	79.87		1	1	1	1	1	2	2	2	2	2	2	1		4	2	2	2	2	3	3	3	3
897	wt%														60.085	40.311	70.937	56.079	81.41	159.694	149.88	101.962	152	61.979	94.203	79.87		1	1	1	1	1	2	2	2	2	2	2	1		4	2	2	2	2	3	3	3	3
898	wt%														60.085	40.311	70.937	56.079	81.41	159.694	149.88	101.962	152	61.979	94.203	79.87		1	1	1	1	1	2	2	2	2	2	2	1		4	2	2	2	2	3	3	3	3
899	wt%														60.085	40.311	70.937	56.079	81.41	159.694	149.88	101.962	152	61.979	94.203	79.87		1	1	1	1	1	2	2	2	2	2	2	1		4	2	2	2	2	3	3	3	3
900	wt%														60.085	40.311	70.937	56.079	81.41	159.694	149.88	101.962	152	61.979	94.203	79.87		1	1	1	1	1	2	2	2	2	2	2	1		4	2	2	2	2	3	3	3	3
901	wt%														60.085	40.311	70.937	56.079	81.41	159.694	149.88	101.962	152	61.979	94.203	79.87		1	1	1	1	1	2	2	2	2	2	2	1		4	2	2	2	2	3	3	3	3
902	wt%														60.085	40.311	70.937	56.079	81.41	159.694	149.88	101.962	152	61.979	94.203	79.87		1	1	1	1	1	2	2	2	2	2	2	1		4	2	2	2	2	3	3	3	3
903	wt%														60.085	40.311	70.937	56.079	81.41	159.694	149.88	101.962	152	61.979	94.203	79.87		1	1	1	1	1	2	2	2	2	2	2	1		4	2	2	2	2	3	3	3	3
904	wt%														60.085	40.311	70.937	56.079	81.41	159.694	149.88	101.962	152	61.979	94.203	79.87		1	1	1	1	1	2	2	2	2	2	2	1		4	2	2	2	2	3	3	3	3
905	wt%														60.085	40.311	70.937	56.079	81.41	159.694	149.88	101.962	152	61.979	94.203	79.87		1	1	1	1	1	2	2	2	2	2	2	1		4	2	2	2	2	3	3	3	3
906	wt%														60.085	40.311	70.937	56.079	81.41	159.694	149.88	101.962	152	61.979	94.203	79.87		1	1	1	1	1	2	2	2	2	2	2	1		4	2	2	2	2	3	3	3	3
907	wt%														60.085	40.311	70.937	56.079	81.41	159.694	149.88	101.962	152	61.979	94.203	79.87		1	1	1	1	1	2	2	2	2	2	2	1		4	2	2	2	2	3	3	3	3
908	wt%														60.085	40.311	70.937	56.079	81.41	159.694	149.88	101.962	152	61.979	94.203	79.87		1	1	1	1	1	2	2	2	2	2	2	1		4	2	2	2	2	3	3	3	3
909	wt%														60.085	40.311	70.937	56.079	81.41	159.694	149.88	101.962	152	61.979	94.203	79.87		1	1	1	1	1	2	2	2	2	2	2	1		4	2	2	2	2	3	3	3	3
910	wt%														60.085	40.311	70.937	56.079	81.41	159.694	149.88	101.962	152	61.979	94.203	79.87		1	1	1	1	1	2	2	2	2	2	2	1		4	2	2	2	2	3	3	3	3
911	wt%														60.085	40.311	70.937	56.079	81.41	159.694	149.88	101.962	152	61.979	94.203	79.87		1	1	1	1	1	2	2	2	2	2	2	1		4	2	2	2	2	3	3	3	3
912	wt%														60.085	40.311	70.937	56.079	81.41	159.694	149.88	101.962	152	61.979	94.203	79.87		1	1	1	1	1	2	2	2	2	2	2	1		4	2	2	2	2	3	3	3	3
913	wt%														60.085	40.311	70.937	56.079	81.41	159.694	149.88	101.962	152	61.979	94.203	79.87		1	1	1	1	1	2	2	2	2	2	2	1		4	2	2	2	2	3	3	3	3
914	wt%														60.085	40.311	70.937	56.079	81.41	159.694	149.88	101.962	152	61.979	94.203	79.87		1	1	1	1	1	2	2	2	2	2	2	1		4	2	2	2	2	3	3	3	3
915	wt%														60.085	40.311	70.937	56.079	81.41	159.694	149.88	101.962	152	61.979	94.203	79.87		1	1	1	1	1	2	2	2	2	2	2	1		4	2	2	2	2	3	3	3	3
916	wt%														60.085	40.311	70.937	56.079	81.41	159.694	149.88	101.962	152	61.979	94.203	79.87		1	1	1	1	1	2	2	2	2	2	2	1		4	2	2	2	2	3	3	3	3
917	wt%														60.085	40.311	70.937	56.079	81.41	159.694	149.88	101.962	152	61.979	94.203	79.87		1	1	1	1	1	2	2	2	2	2	2	1		4	2	2	2	2	3	3	3	3
918	wt%														60.085	40.311	70.937	56.079	81.41	159.694	149.88	101.962	152	61.979	94.203	79.87		1	1	1	1	1	2	2	2	2	2	2	1		4	2	2	2	2	3	3	3	3
919	wt%														60.085	40.311	70.937	56.079	81.41	159.694	149.88	101.962	152	61.979	94.203	79.87		1	1	1	1	1	2	2	2	2	2	2	1		4	2	2	2	2	3	3	3	3
920	wt%														60.085	40.311	70.937	56.079	81.41	159.694	149.88	101.962	152	61.979	94.203	79.87		1	1	1	1	1	2	2	2	2	2	2	1		4	2	2	2	2	3	3	3	3
921	wt%														60.085	40.311	70.937	56.079	81.41	159.694	149.88	101.962	152	61.979	94.203	79.87		1	1	1	1	1	2	2	2	2	2	2	1		4	2	2	2	2	3	3	3	3
922	wt%														60.085	40.311	70.937	56.079	81.41	159.694	149.88	101.962	152	61.979	94.203	79.87		1	1	1	1	1	2	2	2	2	2	2	1		4	2	2	2	2	3	3	3	3
923	wt%														60.085	40.311	70.937	56.079	81.41	159.694	149.88	101.962	152	61.979	94.203	79.87		1	1	1	1	1	2	2	2	2	2	2	1		4	2	2	2	2	3	3	3	3
924	wt%														60.085	40.311	70.937	56.079	81.41	159.694	149.88	101.962	152	61.979	94.203	79.87		1	1	1	1	1	2	2	2	2	2	2	1		4	2	2	2	2	3	3	3	3
925	wt%														60.085	40.311	70.937	56.079	81.41	159.694	149.88	101.962	152	61.979	94.203	79.87		1	1	1	1	1	2	2	2	2	2	2	1		4	2	2	2	2	3	3	3	3
926	wt%														60.085	40.311	70.937	56.079	81.41	159.694	149.88	101.962	152	61.979	94.203	79.87		1	1	1	1	1	2	2	2	2	2	2	1		4	2	2	2	2	3	3	3	3
927	wt%														60.085	40.311	70.937	56.079	81.41	159.694	149.88	101.962	152	61.979	94.203	79.87		1	1	1	1	1	2	2	2	2	2	2	1		4	2	2	2	2	3	3	3	3
928	wt%														60.085	40.311	70.937	56.079	81.41	159.694	149.88	101.962	152	61.979	94.203	79.87		1	1	1	1	1	2	2	2	2	2	2	1		4	2	2	2	2	3	3	3	3
929	wt%														60.085	40.311	70.937	56.079	81.41	159.694	149.88	101.962	152	61.979	94.203	79.87		1	1	1	1	1	2	2	2	2	2	2	1		4	2	2	2	2	3	3	3	3
930	wt%														60.085	40.311	70.937	56.079	81.41	159.694	149.88	101.962	152	61.979	94.203	79.87		1	1	1	1	1	2	2	2	2	2	2	1		4	2	2	2	2	3	3	3	3
931	wt%														60.085	40.311	70.937	56.079	81.41	159.694	149.88	101.962	152	61.979	94.203	79.87		1	1	1	1	1	2	2	2	2	2	2	1		4	2	2	2	2	3	3	3	3
932	wt%														60.085	40.311	70.937	56.079	81.41	159.694	149.88	101.962	152	61.979	94.203	79.87		1	1	1	1	1	2	2	2	2	2	2	1		4	2	2	2	2	3	3	3	3
933	wt%														60.085	40.311	70.937	56.079	81.41	159.694	149.88	101.962	152	61.979	94.203	79.87		1	1	1	1	1	2	2	2	2	2	2	1		4	2	2	2	2	3	3	3	3
934	wt%														60.085	40.311	70.937	56.079	81.41	159.694	149.88	101.962	152	61.979	94.203	79.87		1	1	1	1	1	2	2	2	2	2	2	1		4	2	2	2	2	3	3	3	3
935	wt%														60.085	40.311	70.937	56.079	81.41	159.694	149.88	101.962	152	61.979	94.203	79.87		1	1	1	1	1	2	2	2	2	2	2	1		4	2	2	2	2	3	3	3	3
936	wt%														60.085	40.311	70.937	56.079	81.41	159.694	149.88	101.962	152	61.979	94.203	79.87		1	1	1	1	1	2	2	2	2	2	2	1		4	2	2	2	2	3	3	3	3
937	wt%														60.085	40.311	70.937	56.079	81.41	159.694	149.88	101.962	152	61.979	94.203	79.87		1	1	1	1	1	2	2	2	2	2	2	1		4	2	2	2	2	3	3	3	3
938	wt%														60.085	40.311	70.937	56.079	81.41	159.694	149.88	101.962	152	61.979	94.203	79.87		1	1	1	1	1	2	2	2	2	2	2	1		4	2	2	2	2	3	3	3	3
939	wt%														60.085	40.311	70.937	56.079	81.41	159.694	149.88	101.962	152	61.979	94.203	79.87		1	1	1	1	1	2	2	2	2	2	2	1		4	2	2	2	2	3	3	3	3
940	wt%														60.085	40.311	70.937	56.079	81.41	159.694	149.88	101.962	152	61.979	94.203	79.87		1	1	1	1	1	2	2	2	2	2	2	1		4	2	2	2	2	3	3	3	3
941	wt%														60.085	40.311	70.937	56.079	81.41	159.694	149.88	101.962	152	61.979	94.203	79.87		1	1	1	1	1	2	2	2	2	2	2	1		4	2	2	2	2	3	3	3	3
942	wt%														60.085	40.311	70.937	56.079	81.41	159.694	149.88	101.962	152	61.979	94.203	79.87		1	1	1	1	1	2	2	2	2	2	2	1		4	2	2	2	2	3	3	3	3
943	wt%														60.085	40.311	70.937	56.079	81.41	159.694	149.88	101.962	152	61.979	94.203	79.87		1	1	1	1	1	2	2	2	2	2	2	1		4	2	2	2	2	3	3	3	3
944	wt%														60.085	40.311	70.937	56.079	81.41	159.694	149.88	101.962	152	61.979	94.203	79.87		1	1	1	1	1	2	2	2	2	2	2	1		4	2	2	2	2	3	3	3	3
945	wt%														60.085	40.311	70.937	56.079	81.41	159.694	149.88	101.962	152	61.979	94.203	79.87		1	1	1	1	1	2	2	2	2	2	2	1		4	2	2	2	2	3	3	3	3
946	wt%														60.085	40.311	70.937	56.079	81.41	159.694	149.88	101.962	152	61.979	94.203	79.87		1	1	1	1	1	2	2	2	2	2	2	1		4	2	2	2	2	3	3	3	3
947	wt%														60.085	40.311	70.937	56.079	81.41	159.694	149.88	101.962	152	61.979	94.203	79.87		1	1	1	1	1	2	2	2	2	2	2	1		4	2	2	2	2	3	3	3	3
948	wt%														60.085	40.311	70.937	56.079	81.41	159.694	149.88	101.962	152	61.979	94.203	79.87		1	1	1	1	1	2	2	2	2	2	2	1		4	2	2	2	2	3	3	3	3
949	wt%														60.085	40.311	70.937	56.079	81.41	159.694	149.88	101.962	152	61.979	94.203	79.87		1	1	1	1	1	2	2	2	2	2	2	1		4	2	2	2	2	3	3	3	3
950	wt%														60.085	40.311	70.937	56.079	81.41	159.694	149.88	101.962	152	61.979	94.203	79.87		1	1	1	1	1	2	2	2	2	2	2	1		4	2	2	2	2	3	3	3	3
951	wt%														60.085	40.311	70.937	56.079	81.41	159.694	149.88	101.962	152	61.979	94.203	79.87		1	1	1	1	1	2	2	2	2	2	2	1		4	2	2	2	2	3	3	3	3
952	wt%														60.085	40.311	70.937	56.079	81.41	159.694	149.88	101.962	152	61.979	94.203	79.87		1	1	1	1	1	2	2	2	2	2	2	1		4	2	2	2	2	3	3	3	3
953	wt%														60.085	40.311	70.937	56.079	81.41	159.694	149.88	101.962	152	61.979	94.203	79.87		1	1	1	1	1	2	2	2	2	2	2	1		4	2	2	2	2	3	3	3	3
954	wt%														60.085	40.311	70.937	56.079	81.41	159.694	149.88	101.962	152	61.979	94.203	79.87		1	1	1	1	1	2	2	2	2	2	2	1		4	2	2	2	2	3	3	3	3
955	wt%														60.085	40.311	70.937	56.079	81.41	159.694	149.88	101.962	152	61.979	94.203	79.87		1	1	1	1	1	2	2	2	2	2	2	1		4	2	2	2	2	3	3	3	3
956	wt%														60.085	40.311	70.937	56.079	81.41	159.694	149.88	101.962	152	61.979	94.203	79.87		1	1	1	1	1	2	2	2	2	2	2	1		4	2	2	2	2	3	3	3	3
957	wt%														60.085	40.311	70.937	56.079	81.41	159.694	149.88	101.962	152	61.979	94.203	79.87		1	1	1	1	1	2	2	2	2	2	2	1		4	2	2	2	2	3	3	3	3
958	wt%														60.085	40.311	70.937	56.079	81.41	159.694	149.88	101.962	152	61.979	94.203	79.87		1	1	1	1	1	2	2	2	2	2	2	1		4	2	2	2	2	3	3	3	3
959	wt%														60.085	40.311	70.937	56.079	81.41	159.694	149.88	101.962	152	61.979	94.203	79.87		1	1	1	1	1	2	2	2	2	2	2	1		4	2	2	2	2	3	3	3	3
960	wt%														60.085	40.311	70.937	56.079	81.41	159.694	149.88	101.962	152	61.979	94.203	79.87		1	1	1	1	1	2	2	2	2	2	2	1		4	2	2	2	2	3	3	3	3
961	wt%														60.085	40.311	70.937	56.079	81.41	159.694	149.88	101.962	152	61.979	94.203	79.87		1	1	1	1	1	2	2	2	2	2	2	1		4	2	2	2	2	3	3	3	3
962	wt%														60.085	40.311	70.937	56.079	81.41	159.694	149.88	101.962	152	61.979	94.203	79.87		1	1	1	1	1	2	2	2	2	2	2	1		4	2	2	2	2	3	3	3	3
963	wt%														60.085	40.311	70.937	56.079	81.41	159.694	149.88	101.962	152	61.979	94.203	79.87		1	1	1	1	1	2	2	2	2	2	2	1		4	2	2	2	2	3	3	3	3
964	wt%														60.085	40.311	70.937	56.079	81.41	159.694	149.88	101.962	152	61.979	94.203	79.87		1	1	1	1	1	2	2	2	2	2	2	1		4	2	2	2	2	3	3	3	3
965	wt%														60.085	40.311	70.937	56.079	81.41	159.694	149.88	101.962	152	61.979	94.203	79.87		1	1	1	1	1	2	2	2	2	2	2	1		4	2	2	2	2	3	3	3	3
966	wt%														60.085	40.311	70.937	56.079	81.41	159.694	149.88	101.962	152	61.979	94.203	79.87		1	1	1	1	1	2	2	2	2	2	2	1		4	2	2	2	2	3	3	3	3
967	wt%														60.085	40.311	70.937	56.079	81.41	159.694	149.88	101.962	152	61.979	94.203	79.87		1	1	1	1	1	2	2	2	2	2	2	1		4	2	2	2	2	3	3	3	3
968	wt%														60.085	40.311	70.937	56.079	81.41	159.694	149.88	101.962	152	61.979	94.203	79.87		1	1	1	1	1	2	2	2	2	2	2	1		4	2	2	2	2	3	3	3	3
969	wt%														60.085	40.311	70.937	56.079	81.41	159.694	149.88	101.962	152	61.979	94.203	79.87		1	1	1	1	1	2	2	2	2	2	2	1		4	2	2	2	2	3	3	3	3
970	wt%														60.085	40.311	70.937	56.079	81.41	159.694	149.88	101.962	152	61.979	94.203	79.87		1	1	1	1	1	2	2	2	2	2	2	1		4	2	2	2	2	3	3	3	3
971	wt%														60.085	40.311	70.937	56.079	81.41	159.694	149.88	101.962	152	61.979	94.203	79.87		1	1	1	1	1	2	2	2	2	2	2	1		4	2	2	2	2	3	3	3	3
972	wt%														60.085	40.311	70.937	56.079	81.41	159.694	149.88	101.962	152	61.979	94.203	79.87		1	1	1	1	1	2	2	2	2	2	2	1		4	2	2	2	2	3	3	3	3
973	wt%														60.085	40.311	70.937	56.079	81.41	159.694	149.88	101.962	152	61.979	94.203	79.87		1	1	1	1	1	2	2	2	2	2	2	1		4	2	2	2	2	3	3	3	3
974	wt%														60.085	40.311	70.937	56.079	81.41	159.694	149.88	101.962	152	61.979	94.203	79.87		1	1	1	1	1	2	2	2	2	2	2	1		4	2	2	2	2	3	3	3	3
975	wt%														60.085	40.311	70.937	56.079	81.41	159.694	149.88	101.962	152	61.979	94.203	79.87		1	1	1	1	1	2	2	2	2	2	2	1		4	2	2	2	2	3	3	3	3
976	wt%														60.085	40.311	70.937	56.079	81.41	159.694	149.88	101.962	152	61.979	94.203	79.87		1	1	1	1	1	2	2	2	2	2	2	1		4	2	2	2	2	3	3	3	3
977	wt%														60.085	40.311	70.937	56.079	81.41	159.694	149.88	101.962	152	61.979	94.203	79.87		1	1	1	1	1	2	2	2	2	2	2	1		4	2	2	2	2	3	3	3	3
978	wt%														60.085	40.311	70.937	56.079	81.41	159.694	149.88	101.962	152	61.979	94.203	79.87		1	1	1	1	1	2	2	2	2	2	2	1		4	2	2	2	2	3	3	3	3
979	wt%														60.085	40.311	70.937	56.079	81.41	159.694	149.88	101.962	152	61.979	94.203	79.87		1	1	1	1	1	2	2	2	2	2	2	1		4	2	2	2	2	3	3	3	3
980	wt%														60.085	40.311	70.937	56.079	81.41	159.694	149.88	101.962	152	61.979	94.203	79.87		1	1	1	1	1	2	2	2	2	2	2	1		4	2	2	2	2	3	3	3	3
981	wt%														60.085	40.311	70.937	56.079	81.41	159.694	149.88	101.962	152	61.979	94.203	79.87		1	1	1	1	1	2	2	2	2	2	2	1		4	2	2	2	2	3	3	3	3
982	wt%														60.085	40.311	70.937	56.079	81.41	159.694	149.88	101.962	152	61.979	94.203	79.87		1	1	1	1	1	2	2	2	2	2	2	1		4	2	2	2	2	3	3	3	3
983	wt%														60.085	40.311	70.937	56.079	81.41	159.694	149.88	101.962	152	61.979	94.203	79.87		1	1	1	1	1	2	2	2	2	2	2	1		4	2	2	2	2	3	3	3	3
984	wt%														60.085	40.311	70.937	56.079	81.41	159.694	149.88	101.962	152	61.979	94.203	79.87		1	1	1	1	1	2	2	2	2	2	2	1		4	2	2	2	2	3	3	3	3
985	wt%														60.085	40.311	70.937	56.079	81.41	159.694	149.88	101.962	152	61.979	94.203	79.87		1	1	1	1	1	2	2	2	2	2	2	1		4	2	2	2	2	3	3	3	3
986	wt%														60.085	40.311	70.937	56.079	81.41	159.694	149.88	101.962	152	61.979	94.203	79.87		1	1	1	1	1	2	2	2	2	2	2	1		4	2	2	2	2	3	3	3	3
987	wt%														60.085	40.311	70.937	56.079	81.41	159.694	149.88	101.962	152	61.979	94.203	79.87		1	1	1	1	1	2	2	2	2	2	2	1		4	2	2	2	2	3	3	3	3
988	wt%														60.085	40.311	70.937	56.079	81.41	159.694	149.88	101.962	152	61.979	94.203	79.87		1	1	1	1	1	2	2	2	2	2	2	1		4	2	2	2	2	3	3	3	3
989	wt%														60.085	40.311	70.937	56.079	81.41	159.694	149.88	101.962	152	61.979	94.203	79.87		1	1	1	1	1	2	2	2	2	2	2	1		4	2	2	2	2	3	3	3	3
990	wt%														60.085	40.311	70.937	56.079	81.41	159.694	149.88	101.962	152	61.979	94.203	79.87		1	1	1	1	1	2	2	2	2	2	2	1		4	2	2	2	2	3	3	3	3
991	wt%														60.085	40.311	70.937	56.079	81.41	159.694	149.88	101.962	152	61.979	94.203	79.87		1	1	1	1	1	2	2	2	2	2	2	1		4	2	2	2	2	3	3	3	3
992	wt%														60.085	40.311	70.937	56.079	81.41	159.694	149.88	101.962	152	61.979	94.203	79.87		1	1	1	1	1	2	2	2	2	2	2	1		4	2	2	2	2	3	3	3	3
993	wt%														60.085	40.311	70.937	56.079	81.41	159.694	149.88	101.962	152	61.979	94.203	79.87		1	1	1	1	1	2	2	2	2	2	2	1		4	2	2	2	2	3	3	3	3
994	wt%														60.085	40.311	70.937	56.079	81.41	159.694	149.88	101.962	152	61.979	94.203	79.87		1	1	1	1	1	2	2	2	2	2	2	1		4	2	2	2	2	3	3	3	3
995	wt%														60.085	40.311	70.937	56.079	81.41	159.694	149.88	101.962	152	61.979	94.203	79.87		1	1	1	1	1	2	2	2	2	2	2	1		4	2	2	2	2	3	3	3	3
996	wt%														60.085	40.311	70.937	56.079	81.41	159.694	149.88	101.962	152	61.979	94.203	79.87		1	1	1	1	1	2	2	2	2	2	2	1		4	2	2	2	2	3	3	3	3
997	wt%														60.085	40.311	70.937	56.079	81.41	159.694	149.88	101.962	152	61.979	94.203	79.87		1	1	1	1	1	2	2	2	2	2	2	1		4	2	2	2	2	3	3	3	3
998	wt%														60.085	40.311	70.937	56.079	81.41	159.694	149.88	101.962	152	61.979	94.203	79.87		1	1	1	1	1	2	2	2	2	2	2	1		4	2	2	2	2	3	3	3	3
999	wt%														60.085	40.311	70.937	56.079	81.41	159.694	149.88	101.962	152	61.979	94.203	79.87		1	1	1	1	1	2	2	2	2	2	2	1		4	2	2	2	2	3	3	3	3
1000	wt%														60.085	40.311	70.937	56.079	81.41	159.694	149.88	101.962	152	61.979	94.203	79.87		1	1	1	1	1	2	2	2	2	2	2	1		4	2	2	2	2	3	3	3	3
1001	wt%														60.085	40.311	70.937	56.079	81.41	159.694	149.88	101.962	152	61.979	94.203	79.87		1	1	1	1	1	2	2	2	2	2	2	1		4	2	2	2	2	3	3	3	3
1002	wt%														60.085	40.311	70.937	56.079	81.41	159.694	149.88	101.962	152	61.979	94.203	79.87		1	1	1	1	1	2	2	2	2	2	2	1		4	2	2	2	2	3	3	3	3
1003	wt%														60.085	40.311	70.937	56.079	81.41	159.694	149.88	101.962	152	61.979	94.203	79.87		1	1	1	1	1	2	2	2	2	2	2	1		4	2	2	2	2	3	3	3	3
1004	wt%														60.085	40.311	70.937	56.079	81.41	159.694	149.88	101.962	152	61.979	94.203	79.87		1	1	1	1	1	2	2	2	2	2	2	1		4	2	2	2	2	3	3	3	3
1005	wt%														60.085	40.311	70.937	56.079	81.41	159.694	149.88	101.962	152	61.979	94.203	79.87		1	1	1	1	1	2	2	2	2	2	2	1		4	2	2	2	2	3	3	3	3
1006	wt%														60.085	40.311	70.937	56.079	81.41	159.694	149.88	101.962	152	61.979	94.203	79.87		1	1	1	1	1	2	2	2	2	2	2	1		4	2	2	2	2	3	3	3	3
1007	wt%														60.085	40.311	70.937	56.079	81.41	159.694	149.88	101.962	152	61.979	94.203	79.87		1	1	1	1	1	2	2	2	2	2	2	1		4	2	2	2	2	3	3	3	3
1008	wt%														60.085	40.311	70.937	56.079	81.41	159.694	149.88	101.962	152	61.979	94.203	79.87		1	1	1	1	1	2	2	2	2	2	2	1		4	2	2	2	2	3	3	3	3
1009	wt%														60.085	40.311	70.937	56.079	81.41	159.694	149.88	101.962	152	61.979	94.203	79.87		1	1	1	1	1	2	2	2	2	2	2	1		4	2	2	2	2	3	3	3	3
1010	wt%														60.085	40.311	70.937	56.079	81.41	159.694	149.88	101.962	152	61.979	94.203	79.87		1	1	1	1	1	2	2	2	2	2	2	1		4	2	2	2	2	3	3	3	3
1011	wt%														60.085	40.311	70.937	56.079	81.41	159.694	149.88	101.962	152	61.979	94.203	79.87		1	1	1	1	1	2	2	2	2	2	2	1		4	2	2	2	2	3	3	3	3
1012	wt%														60.085	40.311	70.937	56.079	81.41	159.694	149.88	101.962	152	61.979	94.203	79.87		1	1	1	1	1	2	2	2	2	2	2	1		4	2	2	2	2	3	3	3	3
1013	wt%														60.085	40.311	70.937	56.079	81.41	159.694	149.88	101.962	152	61.979	94.203	79.87		1	1	1	1	1	2	2	2	2	2	2	1		4	2	2	2	2	3	3	3	3
1014	wt%														60.085	40.311	70.937	56.079	81.41	159.694	149.88	101.962	152	61.979	94.203	79.87		1	1	1	1	1	2	2	2	2	2	2	1		4	2	2	2	2	3	3	3	3
1015	wt%														60.085	40.311	70.937	56.079	81.41	159.694	149.88	101.962	152	61.979	94.203	79.87		1	1	1	1	1	2	2	2	2	2	2	1		4	2	2	2	2	3	3	3	3
1016	wt%														60.085	40.311	70.937	56.079	81.41	159.694	149.88	101.962	152	61.979	94.203	79.87		1	1	1	1	1	2	2	2	2	2	2	1		4	2	2	2	2	3	3	3	3
1017	wt%														60.085	40.311	70.937	56.079	81.41	159.694	149.88	101.962	152	61.979	94.203	79.87		1	1	1	1	1	2	2	2	2	2	2	1		4	2	2	2	2	3	3	3	3
1018	wt%														60.085	40.311	70.937	56.079	81.41	159.694	149.88	101.962	152	61.979	94.203	79.87		1	1	1	1	1	2	2	2	2	2	2	1		4	2	2	2	2	3	3	3	3
1019	wt%														60.085	40.311	70.937	56.079	81.41	159.694	149.88	101.962	152	61.979	94.203	79.87		1	1	1	1	1	2	2	2	2	2	2	1		4	2	2	2	2	3	3	3	3
1020	wt%														60.085	40.311	70.937	56.079	81.41	159.694	149.88	101.962	152	61.979	94.203	79.87		1	1	1	1	1	2	2	2	2	2	2	1		4	2	2	2	2	3	3	3	3
1021	wt%														60.085	40.311	70.937	56.079	81.41	159.694	149.88	101.962	152	61.979	94.203	79.87		1	1	1	1	1	2	2	2	2	2	2	1		4	2	2	2	2	3	3	3	3
1022	wt%														60.085	40.311	70.937	56.079	81.41	159.694	149.88	101.962	152	61.979	94.203	79.87		1	1	1	1	1	2	2	2	2	2	2	1		4	2	2	2	2	3	3	3	3
1023	wt%														60.085	40.311	70.937	56.079	81.41	159.694	149.88	101.962	152	61.979	94.203	79.87		1	1	1	1	1	2	2	2	2	2	2	1		4	2	2	2	2	3	3	3	3
1024	wt%														60.085	40.311	70.937	56.079	81.41	159.694	149.88	101.962	152	61.979	94.203	79.87		1	1	1	1	1	2	2	2	2	2	2	1		4	2	2	2	2	3	3	3	3
1025	wt%														60.085	40.311	70.937	56.079	81.41	159.694	149.88	101.962	152	61.979	94.203	79.87		1	1	1	1	1	2	2	2	2	2	2	1		4	2	2	2	2	3	3	3	3
1026	wt%														60.085	40.311	70.937	56.079	81.41	159.694	149.88	101.962	152	61.979	94.203	79.87		1	1	1	1	1	2	2	2	2	2	2	1		4	2	2	2	2	3	3	3	3
1027	wt%														60.085	40.311	70.937	56.079	81.41	159.694	149.88	101.962	152	61.979	94.203	79.87		1	1	1	1	1	2	2	2	2	2	2	1		4	2	2	2	2	3	3	3	3
1028	wt%														60.085	40.311	70.937	56.079	81.41	159.694	149.88	101.962	152	61.979	94.203	79.87		1	1	1	1	1	2	2	2	2	2	2	1		4	2	2	2	2	3	3	3	3
1029	wt%														60.085	40.311	70.937	56.079	81.41	159.694	149.88	101.962	152	61.979	94.203	79.87		1	1	1	1	1	2	2	2	2	2	2	1		4	2	2	2	2	3	3	3	3
1030	wt%														60.085	40.311	70.937	56.079	81.41	159.694	149.88	101.962	152	61.979	94.203	79.87		1	1	1	1	1	2	2	2	2	2	2	1		4	2	2	2	2	3	3	3	3
1031	wt%														60.085	40.311	70.937	56.079	81.41	159.694	149.88	101.962	152	61.979	94.203	79.87		1	1	1	1	1	2	2	2	2	2	2	1		4	2	2	2	2	3	3	3	3
1032	wt%														60.085	40.311	70.937	56.079	81.41	159.694	149.88	101.962	152	61.979	94.203	79.87		1	1	1	1	1	2	2	2	2	2	2	1		4	2	2	2	2	3	3	3	3
1033	wt%														60.085	40.311	70.937	56.079	81.41	159.694	149.88	101.962	152	61.979	94.203	79.87		1	1	1	1	1	2	2	2	2	2	2	1		4	2	2	2	2	3	3	3	3
1034	wt%														60.085	40.311	70.937	56.079	81.41	159.694	149.88	101.962	152	61.979	94.203	79.87		1	1	1	1	1	2	2	2	2	2	2	1		4	2	2	2	2	3	3	3	3
1035	wt%														60.085	40.311	70.937	56.079	81.41	159.694	149.88	101.962	152	61.979	94.203	79.87		1	1	1	1	1	2	2	2	2	2	2	1		4	2	2	2	2	3	3	3	3
1036	wt%														60.085	40.311	70.937	56.079	81.41	159.694	149.88	101.962	152	61.979	94.203	79.87		1	1	1	1	1	2	2	2	2	2	2	1		4	2	2	2	2	3	3	3	3
1037	wt%														60.085	40.311	70.937	56.079	81.41	159.694	149.88	101.962	152	61.979	94.203	79.87		1	1	1	1	1	2	2	2	2	2	2	1		4	2	2	2	2	3	3	3	3
1038	wt%														60.085	40.311	70.937	56.079	81.41	159.694	149.88	101.962	152	61.979	94.203	79.87		1	1	1	1	1	2	2	2	2	2	2	1		4	2	2	2	2	3	3	3	3
1039	wt%														60.085	40.311	70.937	56.079	81.41	159.694	149.88	101.962	152	61.979	94.203	79.87		1	1	1	1	1	2	2	2	2	2	2	1		4	2	2	2	2	3	3	3	3
1040	wt%														60.085	40.311	70.937	56.079	81.41	159.694	149.88	101.962	152	61.979	94.203	79.87		1	1	1	1	1	2	2	2	2	2	2	1		4	2	2	2	2	3	3	3	3
1041	wt%														60.085	40.311	70.937	56.079	81.41	159.694	149.88	101.962	152	61.979	94.203	79.87		1	1	1	1	1	2	2	2	2	2	2	1		4	2	2	2	2	3	3	3	3
1042	wt%														60.085	40.311	70.937	56.079	81.41	159.694	149.88	101.962	152	61.979	94.203	79.87		1	1	1	1	1	2	2	2	2	2	2	1		4	2	2	2	2	3	3	3	3
1043	wt%														60.085	40.311	70.937	56.079	81.41	159.694	149.88	101.962	152	61.979	94.203	79.87		1	1	1	1	1	2	2	2	2	2	2	1		4	2	2	2	2	3	3	3	3
1044	wt%														60.085	40.311	70.937	56.079	81.41	159.694	149.88	101.962	152	61.979	94.203	79.87		1	1	1	1	1	2	2	2	2	2	2	1		4	2	2	2	2	3	3	3	3
1045	wt%														60.085	40.311	70.937	56.079	81.41	159.694	149.88	101.962	152	61.979	94.203	79.87		1	1	1	1	1	2	2	2	2	2	2	1		4	2	2	2	2	3	3	3	3
1046	wt%														60.085	40.311	70.937	56.079	81.41	159.694	149.88	101.962	152	61.979	94.203	79.87		1	1	1	1	1	2	2	2	2	2	2	1		4	2	2	2	2	3	3	3	3
1047	wt%														60.085	40.311	70.937	56.079	81.41	159.694	149.88	101.962	152	61.979	94.203	79.87		1	1	1	1	1	2	2	2	2	2	2	1		4	2	2	2	2	3	3	3	3
1048	wt%														60.085	40.311	70.937	56.079	81.41	159.694	149.88	101.962	152	61.979	94.203	79.87		1	1	1	1	1	2	2	2	2	2	2	1		4	2	2	2	2	3	3	3	3
1049	wt%														60.085	40.311	70.937	56.079	81.41	159.694	149.88	101.962	152	61.979	94.203	79.87		1	1	1	1	1	2	2	2	2	2	2	1		4	2	2	2	2	3	3	3	3
1050	wt%														60.085	40.311	70.937	56.079	81.41	159.694	149.88	101.962	152	61.979	94.203	79.87		1	1	1	1	1	2	2	2	2	2	2	1		4	2	2	2	2	3	3	3	3
1051	wt%														60.085	40.311	70.937	56.079	81.41	159.694	149.88	101.962	152	61.979	94.203	79.87		1	1	1	1	1	2	2	2	2	2	2	1		4	2	2	2	2	3	3	3	3
1052	wt%														60.085	40.311	70.937	56.079	81.41	159.694	149.88	101.962	152	61.979	94.203	79.87		1	1	1	1	1	2	2	2	2	2	2	1		4	2	2	2	2	3	3	3	3
1053	wt%														60.085	40.311	70.937	56.079	81.41	159.694	149.88	101.962	152	61.979	94.203	79.87		1	1	1	1	1	2	2	2	2	2	2	1		4	2	2	2	2	3	3	3	3
1054	wt%														60.085	40.311	70.937	56.079	81.41	159.694	149.88	101.962	152	61.979	94.203	79.87		1	1	1	1	1	2	2	2	2	2	2	1		4	2	2	2	2	3	3	3	3
1055	wt%														60.085	40.311	70.937	56.079	81.41	159.694	149.88	101.962	152	61.979	94.203	79.87		1	1	1	1	1	2	2	2	2	2	2	1		4	2	2	2	2	3	3	3	3
1056	wt%														60.085	40.311	70.937	56.079	81.41	159.694	149.88	101.962	152	61.979	94.203	79.87		1	1	1	1	1	2	2	2	2	2	2	1		4	2	2	2	2	3	3	3	3
1057	wt%														60.085	40.311	70.937	56.079	81.41	159.694	149.88	101.962	152	61.979	94.203	79.87		1	1	1	1	1	2	2	2	2	2	2	1		4	2	2	2	2	3	3	3	3
1058	wt%														60.085	40.311	70.937	56.079	81.41	159.694	149.88	101.962	152	61.979	94.203	79.87		1	1	1	1	1	2	2	2	2	2	2	1		4	2	2	2	2	3	3	3	3
1059	wt%														60.085	40.311	70.937	56.079	81.41	159.694	149.88	101.962	152	61.979	94.203	79.87		1	1	1	1	1	2	2	2	2	2	2	1		4	2	2	2	2	3	3	3	3
1060	wt%														60.085	40.311	70.937	56.079	81.41	159.694	149.88	101.962	152	61.979	94.203	79.87		1	1	1	1	1	2	2	2	2	2	2	1		4	2	2	2	2	3	3	3	3
1061	wt%														60.085	40.311	70.937	56.079	81.41	159.694	149.88	101.962	152	61.979	94.203	79.87		1	1	1	1	1	2	2	2	2	2	2	1		4	2	2	2	2	3	3	3	3
1062	wt%														60.085	40.311	70.937	56.079	81.41	159.694	149.88	101.962	152	61.979	94.203	79.87		1	1	1	1	1	2	2	2	2	2	2	1		4	2	2	2	2	3	3	3	3
1063	wt%														60.085	40.311	70.937	56.079	81.41	159.694	149.88	101.962	152	61.979	94.203	79.87		1	1	1	1	1	2	2	2	2	2	2	1		4	2	2	2	2	3	3	3	3
1064	wt%														60.085	40.311	70.937	56.079	81.41	159.694	149.88	101.962	152	61.979	94.203	79.87		1	1	1	1	1	2	2	2	2	2	2	1		4	2	2	2	2	3	3	3	3
1065	wt%														60.085	40.311	70.937	56.079	81.41	159.694	149.88	101.962	152	61.979	94.203	79.87		1	1	1	1	1	2	2	2	2	2	2	1		4	2	2	2	2	3	3	3	3
1066	wt%														60.085	40.311	70.937	56.079	81.41	159.694	149.88	101.962	152	61.979	94.203	79.87		1	1	1	1	1	2	2	2	2	2	2	1		4	2	2	2	2	3	3	3	3
1067	wt%														60.085	40.311	70.937	56.079	81.41	159.694	149.88	101.962	152	61.979	94.203	79.87		1	1	1	1	1	2	2	2	2	2	2	1		4	2	2	2	2	3	3	3	3
1068	wt%														60.085	40.311	70.937	56.079	81.41	159.694	149.88	101.962	152	61.979	94.203	79.87		1	1	1	1	1	2	2	2	2	2	2	1		4	2	2	2	2	3	3	3	3
1069	wt%														60.085	40.311	70.937	56.079	81.41	159.694	149.88	101.962	152	61.979	94.203	79.87		1	1	1	1	1	2	2	2	2	2	2	1		4	2	2	2	2	3	3	3	3
1070	wt%														60.085	40.311	70.937	56.079	81.41	159.694	149.88	101.962	152	61.979	94.203	79.87		1	1	1	1	1	2	2	2	2	2	2	1		4	2	2	2	2	3	3	3	3
1071	wt%														60.085	40.311	70.937	56.079	81.41	159.694	149.88	101.962	152	61.979	94.203	79.87		1	1	1	1	1	2	2	2	2	2	2	1		4	2	2	2	2	3	3	3	3
1072	wt%														60.085	40.311	70.937	56.079	81.41	159.694	149.88	101.962	152	61.979	94.203	79.87		1	1	1	1	1	2	2	2	2	2	2	1		4	2	2	2	2	3	3	3	3
1073	wt%														60.085	40.311	70.937	56.079	81.41	159.694	149.88	101.962	152	61.979	94.203	79.87		1	1	1	1	1	2	2	2	2	2	2	1		4	2	2	2	2	3	3	3	3
1074	wt%														60.085	40.311	70.937	56.079	81.41	159.694	149.88	101.962	152	61.979	94.203	79.87		1	1	1	1	1	2	2	2	2	2	2	1		4	2	2	2	2	3	3	3	3
1075	wt%														60.085	40.311	70.937	56.079	81.41	159.694	149.88	101.962	152	61.979	94.203	79.87		1	1	1	1	1	2	2	2	2	2	2	1		4	2	2	2	2	3	3	3	3
1076	wt%														60.085	40.311	70.937	56.079	81.41	159.694	149.88	101.962	152	61.979	94.203	79.87		1	1	1	1	1	2	2	2	2	2	2	1		4	2	2	2	2	3	3	3	3
1077	wt%														60.085	40.311	70.937	56.079	81.41	159.694	149.88	101.962	152	61.979	94.203	79.87		1	1	1	1	1	2	2	2	2	2	2	1		4	2	2	2	2	3	3	3	3
1078	wt%														60.085	40.311	70.937	56.079	81.41	159.694	149.88	101.962	152	61.979	94.203	79.87		1	1	1	1	1	2	2	2	2	2	2	1		4	2	2	2	2	3	3	3	3
1079	wt%														60.085	40.311	70.937	56.079	81.41	159.694	149.88	101.962	152	61.979	94.203	79.87		1	1	1	1	1	2	2	2	2	2	2	1		4	2	2	2	2	3	3	3	3
1080	wt%														60.085	40.311	70.937	56.079	81.41	159.694	149.88	101.962	152	61.979	94.203	79.87		1	1	1	1	1	2	2	2	2	2	2	1		4	2	2	2	2	3	3	3	3
1081	wt%														60.085	40.311	70.937	56.079	81.41	159.694	149.88	101.962	152	61.979	94.203	79.87		1	1	1	1	1	2	2	2	2	2	2	1		4	2	2	2	2	3	3	3	3
1082	wt%														60.085	40.311	70.937	56.079	81.41	159.694	149.88	101.962	152	61.979	94.203	79.87		1	1	1	1	1	2	2	2	2	2	2	1		4	2	2	2	2	3	3	3	3
1083	wt%														60.085	40.311	70.937	56.079	81.41	159.694	149.88	101.962	152	61.979	94.203	79.87		1	1	1	1	1	2	2	2	2	2	2	1		4	2	2	2	2	3	3	3	3
1084	wt%														60.085	40.311	70.937	56.079	81.41	159.694	149.88	101.962	152	61.979	94.203	79.87		1	1	1	1	1	2	2	2	2	2	2	1		4	2	2	2	2	3	3	3	3
1085	wt%														60.085	40.311	70.937	56.079	81.41	159.694	149.88	101.962	152	61.979	94.203	79.87		1	1	1	1	1	2	2	2	2	2	2	1		4	2	2	2	2	3	3	3	3
1086	wt%														60.085	40.311	70.937	56.079	81.41	159.694	149.88	101.962	152	61.979	94.203	79.87		1	1	1	1	1	2	2	2	2	2	2	1		4	2	2	2	2	3	3	3	3
1087	wt%														60.085	40.311	70.937	56.079	81.41	159.694	149.88	101.962	152	61.979	94.203	79.87		1	1	1	1	1	2	2	2	2	2	2	1		4	2	2	2	2	3	3	3	3
1088	wt%														60.085	40.311	70.937	56.079	81.41	159.694	149.88	101.962	152	61.979	94.203	79.87		1	1	1	1	1	2	2	2	2	2	2	1		4	2	2	2	2	3	3	3	3
1089	wt%														60.085	40.311	70.937	56.079	81.41	159.694	149.88	101.962	152	61.979	94.203	79.87		1	1	1	1	1	2	2	2	2	2	2	1		4	2	2	2	2	3	3	3	3
1090	wt%														60.085	40.311	70.937	56.079	81.41	159.694	149.88	101.962	152	61.979	94.203	79.87		1	1	1	1	1	2	2	2	2	2	2	1		4	2	2	2	2	3	3	3	3
1091	wt%														60.085	40.311	70.937	56.079	81.41	159.694	149.88	101.962	152	61.979	94.203	79.87		1	1	1	1	1	2	2	2	2	2	2	1		4	2	2	2	2	3	3	3	3
1092	wt%														60.085	40.311	70.937	56.079	81.41	159.694	149.88	101.962	152	61.979	94.203	79.87		1	1	1	1	1	2	2	2	2	2	2	1		4	2	2	2	2	3	3	3	3
1093	wt%														60.085	40.311	70.937	56.079	81.41	159.694	149.88	101.962	152	61.979	94.203	79.87		1	1	1	1	1	2	2	2	2	2	2	1		4	2	2	2	2	3	3	3	3
1094	wt%														60.085	40.311	70.937	56.079	81.41	159.694	149.88	101.962	152	61.979	94.203	79.87		1	1	1	1	1	2	2	2	2	2	2	1		4	2	2	2	2	3	3	3	3
1095	wt%														60.085	40.311	70.937	56.079	81.41	159.694	149.88	101.962	152	61.979	94.203	79.87		1	1	1	1	1	2	2	2	2	2	2	1		4	2	2	2	2	3	3	3	3
1096	wt%														60.085	40.311	70.937	56.079	81.41	159.694	149.88	101.962	152	61.979	94.203	79.87		1	1	1	1	1	2	2	2	2	2	2	1		4	2	2	2	2	3	3	3	3
1097	wt%														60.085	40.311	70.937	56.079	81.41	159.694	149.88	101.962	152	61.979	94.203	79.87		1	1	1	1	1	2	2	2	2	2	2	1		4	2	2	2	2	3	3	3	3
1098	wt%														60.085	40.311	70.937	56.079	81.41	159.694	149.88	101.962	152	61.979	94.203	79.87		1	1	1	1	1	2	2	2	2	2	2	1		4	2	2	2	2	3	3	3	3
1099	wt%														60.085	40.311	70.937	56.079	81.41	159.694	149.88	101.962	152	61.979	94.203	79.87		1	1	1	1	1	2	2	2	2	2	2	1		4	2	2	2	2	3	3	3	3
[truncated: 73 more columns]
