# Supplementary material
Source: MDPI journal article supplement (https://www.mdpi.com/2076-3263/13/6/170)
Supplement: s1 [file s1 › Titles Of Files S1-S6.pdf]

File S1 The calculation of molecular formula of ilmenite for only one spot analysis.

File S2 The calculation of molecular formulas of ilmenite for several spot analyses.

File S3 The calculation of molecular formula of leached ilmenite for only one spot analysis.

File S4 The calculation of molecular formulas of leached ilmenite for several spot analyses.

File S5 The calculation of molecular formula of pseudorutile/leached pseudorutile for only one spot analysis.

File S6 The calculation of molecular formulas of pseudorutile/leached pseudorutile for several spot analyses.
